# Supplementary material for: Diverse evolutionary pathways challenge the use of collateral sensitivity as a strategy to suppress resistance
Source: eLife. 2023 Sep 22;12:e85023. doi: 10.7554/eLife.85023 (PMC10695565; doi:10.7554/eLife.85023)
Supplement: Figure 1—source data 1. [file elife-85023-fig1-data1.xlsx]

## Sheet: Sheet1
Table 1- Source Data 1. Individual bioreplicates of EC50 values (nM) obtained from dose response assays.
		3D7 A10					DHODH C276Y					DHODH F227L				DHODH F227L/L531F
Compound	Smiles	3D7 A10-Biorep 1	3D7 A10-Biorep 2	3D7 A10-Biorep 3	3D7 A10-Biorep 4	3D7 A10-Biorep 5	DHODH C276Y-Biorep 1	DHODH C276Y-Biorep 2	DHODH C276Y-Biorep 3	DHODH C276Y-Biorep 4	DHODH C276Y-Biorep 5	DHODH F227L-Biorep 1	DHODH F227L-Biorep 2	DHODH F227L-Biorep 3	DHODH F227L-Biorep 4	DHODH F227L/L531F-Biorep 1	DHODH F227L/L531F-Biorep 2	DHODH F227L/L531F-Biorep 3	DHODH F227L/L531F-Biorep 4
Atovaquone		0.48	0.527	0.492	N/A	N/A	0.525	0.473	0.417	N/A	N/A	0.357	0.374	0.453	N/A	0.289	0.334	0.307	N/A
DHA		2.52	2.45	3.6	N/A	N/A	2.73	2.15	3.52	N/A	N/A	2.56	2.27	4.47	N/A	2.44	3.02	4.02	N/A
DSM267		2.03	1.76	1.84	3.4	4.81	21.7	19.6	21	37.6	56.2	21.7	19.8	23.2	36.8	> 501	> 501	>500	>500
Genz669178		3.91	3.96	3.71	N/A	N/A	15.7	15.2	16	N/A	N/A	18.2	19.9	24.4	N/A	16.1	21	16.9	N/A
IDI-6273		347	383	348	N/A	N/A	29.6	37.3	33	N/A	N/A	207	253	260	N/A	1070	1510	968	N/A
Mefloquine		15.1	20.1	17.4	N/A	N/A	16.9	19.1	14.6	N/A	N/A	14.8	18	17.6	N/A	18.4	22.3	15.1	N/A
N16306-26-3	C[C@H](Oc1ccc(cc1)C(=O)c1ccc(F)cc1)C(=O)N1CCc2ccc(cc12)C(F)(F)F	1.42	1.39	1.6	1.72	3.22	0.764	0.509	0.639	1.1	1.06	0.339	0.182	0.377	0.506	0.755	0.753	0.859	0.907
TCMDC-123545	COc1ccc(c(OC)c1)-n1ccnc1SCC(=O)Nc1cccc(c1)C(F)(F)F	77.2	84.5	74.1	82.3	153	32.1	34.4	37.9	58.8	58.3	9.52	9.93	11.8	12	11.9	15.3	10	N/A
TCMDC-123566	CCCn1c(O)nnc1SCC(=O)Nc1cc(ccc1Cl)C(F)(F)F	48.7	45.8	45.7	59.2	100	14.3	16.1	16.1	N/A	N/A	28.3	32	35.9	37	80.6	127	98.4	81.4
TCMDC-123620	CC(Oc1ccc(Cl)cc1C)C(=O)N1CCc2ccccc12	4060	3090	2460	2020	4720	122	63.9	56.8	81.3	94.9	406	279	259	247	1670	1370	972	965
TCMDC-123647	COc1ccccc1-n1c(SCC(=O)Nc2ccccc2F)nc2cccnc12	123	137	121	119	233	10.3	10.4	7.04	12	13.7	44.3	48.2	52	39.5	567	1020	551	N/A
TCMDC-123823	COc1ccccc1-n1ccnc1SCC(=O)Nc1cc(ccc1Cl)C(F)(F)F	3.47	2.61	3.25	N/A	N/A	1.88	1.76	1.77	N/A	N/A	0.629	0.416	0.576	N/A	N/A	0.465	0.578	N/A
TCMDC-123826	Cc1cc(Nc2ccc(Cl)cc2)n2nc(nc2n1)C(F)(F)F	38.7	34.1	37	39.6	76.3	410	513	500	683	761	227	252	243	282	857	1380	893	1220
TCMDC-124402	CCc1nc2nc(C)cc(Nc3cc(C)cc(C)c3)n2n1	82	76.5	65.2	85.5	186	614	663	650	700	1220	409	473	489	833	4370	5210	3640	10400
TCMDC-124417	Cc1nc2nc(C)cc(Nc3ccc(Cl)c(Cl)c3)n2n1	74.4	79.8	70.8	N/A	172	447	454	466	N/A	827	523	563	582	N/A	10700	25000	11300	N/A
TCMDC-124801	Cc1noc(-c2cccs2)c1C(=O)NCCc1cccc(Cl)c1	199	193	168	222	447	71.5	69.2	58.2	85.1	95.1	194	161	182	185	65.2	92.6	56.1	99
TCMDC-125162	Cc1noc2nc(C)nc(Nc3ccc(C)c(Cl)c3)c12	345	340	354	364	944	2780	2330	2570	3420	5070	263	206	331	275	2870	3460	2840	3420
TCMDC-125334	CCCN(Cc1nnc(o1)-c1ccco1)C(=O)C1CCCN(C1)C(=O)c1ccc(Cl)cc1	81.5	106	86.7	100	187	8.91	9.33	8.92	N/A	N/A	23.9	27	33.1	N/A	15	20.7	15	N/A
TCMDC-125433	CC(=O)c1c(C)[nH]cc1Cc1ccccc1Cl	106	97.8	91.7	110	250	2.94	2.64	3.35	N/A	N/A	22	26	23.2	22.9	49.6	69.4	47.1	47.6
TCMDC-125436	COCC(C)n1c(SCC(=O)Nc2cc(ccc2Cl)C(F)(F)F)nc2ccccc2c1=O	245	283	231	367	N/A	284	284	275	N/A	N/A	773	880	1030	N/A	9360	13100	13500	N/A
TCMDC-134843	COCc1ccccc1C(=O)NCCOc1cc(C)cc(C)c1	116	73.5	109	145	228	5.08	4.45	4.92	7.92	6.8	64.8	64.6	70.5	65.9	240	295	208	327
TCMDC-136129	Cc1nc2ccc(cc2c(O)c1C#N)-c1ccc(OC(F)(F)F)cc1	9.51	11.4	11.2	5.58	12.9	50.8	46.1	50.9	26.3	39	44.5	60.5	68.9	23.2	40.8	56.9	60.2	20.5
TCMDC-140907	Cc1sc(CNCCCNc2cc(=O)c3ccccc3[nH]2)c(I)c1C	>499	> 499	> 499	N/A	> 499	> 499	> 499	> 499	>499	>499	> 499	> 499	N/A	781	447	459	> 499	> 499
