# Supplementary material for: Diverse evolutionary pathways challenge the use of collateral sensitivity as a strategy to suppress resistance
Source: eLife. 2023 Sep 22;12:e85023. doi: 10.7554/eLife.85023 (PMC10695565; doi:10.7554/eLife.85023)
Supplement: Figure 2—figure supplement 2—source data 1. — Status column indicates whether the mutation is present at a clonal allele frequency or mixed allele frequency since the samples were bulk populations. [file elife-85023-fig2-figsupp2-data1.xlsx]

## Sheet: Sheet1
Figure 2- figure supplement 2-Data Source 1. Whole-genome sequencing analysis of bulk selected populations. Status column indicates whether the mutation is present at a clonal allele frequency or mixed allele frequency since the samples were bulk populations.
Sample Name	Parent Line	Drug	Chromosome	Position	Gene_Name	Gene_Description	Quality	Ref_Base	Alt_Base	Type	Effect	Impact	Codon_Change	Amino_Acid_Change	Status
3D7_1µM-TCMDC125334-Pulse2-F1	3D7 A10 Parent	TCMDC-125334	Pf3D7_02_v3	934496			4137.16	G	T	SNP	intergenic_region				Mixed
3D7_1µM-TCMDC125334-Pulse2-F1	3D7 A10 Parent	TCMDC-125334	Pf3D7_03_v3	411920			512.56	GA	G	INDEL	intergenic_region			n.411921delA	Mixed
3D7_1µM-TCMDC125334-Pulse2-F1	3D7 A10 Parent	TCMDC-125334	Pf3D7_06_v3	122433			565.44	AT	A	INDEL	intergenic_region			n.122434delT	Mixed
3D7_1µM-TCMDC125334-Pulse2-F1	3D7 A10 Parent	TCMDC-125334	Pf3D7_08_v3	1049223			510.12	AT	A	INDEL	intergenic_region			n.1049224delT	Mixed
3D7_1µM-TCMDC125334-Pulse2-F1	3D7 A10 Parent	TCMDC-125334	Pf3D7_09_v3	991250	PF3D7_0924400	conserved Plasmodium protein, unknown function	501.12	GA	G	INDEL	frameshift_variant		acg/	p.Thr696fs/c.2086delA	Mixed
3D7_1µM-TCMDC125334-Pulse2-F1	3D7 A10 Parent	TCMDC-125334	Pf3D7_11_v3	451906			505.88	CT	C	INDEL	intergenic_region			n.451907delT	Mixed
3D7_1µM-TCMDC125334-Pulse2-F1	3D7 A10 Parent	TCMDC-125334	Pf3D7_12_v3	1221885	PF3D7_1229800	myosin D (MyoD)	532.28	CATT	C	INDEL	inframe_deletion		aat/	p.Asn1472del/c.4414_4416delAAT	Mixed
3D7_1µM-TCMDC125334-Pulse2-F1	3D7 A10 Parent	TCMDC-125334	Pf3D7_13_v3	2663030			663.88	CTTT	C	INDEL	intergenic_region			n.2663031_2663033delTTT	Mixed
3D7_1µM-TCMDC125334-Pulse2-F3	3D7 A10 Parent	TCMDC-125334	Pf3D7_01_v3	561522	PF3D7_0114600	stevor, pseudogene	1801.14	A	T	SNP	missense_variant	MISSENSE	Tat/Aat	p.Tyr5Asn/c.13T>A	Clonal
3D7_1µM-TCMDC125334-Pulse2-F3	3D7 A10 Parent	TCMDC-125334	Pf3D7_02_v3	934496			4137.16	G	T	SNP	intergenic_region				Mixed
3D7_1µM-TCMDC125334-Pulse2-F3	3D7 A10 Parent	TCMDC-125334	Pf3D7_10_v3	333134	PF3D7_1008100	conserved Plasmodium protein, unknown function	8138.14	C	G	SNP	missense_variant	MISSENSE	cCt/cGt	p.Pro630Arg/c.1889C>G	Clonal
3D7_1µM-TCMDC125334-Pulse2-F3	3D7 A10 Parent	TCMDC-125334	Pf3D7_03_v3	411920			512.56	GA	G	INDEL	intergenic_region			n.411921delA	Mixed
3D7_1µM-TCMDC125334-Pulse2-F3	3D7 A10 Parent	TCMDC-125334	Pf3D7_06_v3	122433			565.44	AT	A	INDEL	intergenic_region			n.122434delT	Mixed
3D7_1µM-TCMDC125334-Pulse2-F3	3D7 A10 Parent	TCMDC-125334	Pf3D7_07_v3	144688	PF3D7_0703600	conserved Plasmodium protein, unknown function	977.17	T	TACATATAA	INDEL	intron_variant			c.237+16_237+17insACATATAA	Clonal
3D7_1µM-TCMDC125334-Pulse2-F3	3D7 A10 Parent	TCMDC-125334	Pf3D7_08_v3	1049223			510.12	AT	A	INDEL	intergenic_region			n.1049224delT	Mixed
3D7_1µM-TCMDC125334-Pulse2-F3	3D7 A10 Parent	TCMDC-125334	Pf3D7_09_v3	991250	PF3D7_0924400	conserved Plasmodium protein, unknown function	501.12	GA	G	INDEL	frameshift_variant		acg/	p.Thr696fs/c.2086delA	Mixed
3D7_1µM-TCMDC125334-Pulse2-F3	3D7 A10 Parent	TCMDC-125334	Pf3D7_11_v3	451906			505.88	CT	C	INDEL	intergenic_region			n.451907delT	Mixed
3D7_1µM-TCMDC125334-Pulse2-F3	3D7 A10 Parent	TCMDC-125334	Pf3D7_12_v3	1221885	PF3D7_1229800	myosin D (MyoD)	532.28	CATT	C	INDEL	inframe_deletion		aat/	p.Asn1472del/c.4414_4416delAAT	Mixed
3D7_1µM-TCMDC125334-Pulse2-F3	3D7 A10 Parent	TCMDC-125334	Pf3D7_13_v3	2663030			663.88	CTTT	C	INDEL	intergenic_region			n.2663031_2663033delTTT	Mixed
3D7_1µM-TCMDC125334-Pulse2-F3	3D7 A10 Parent	TCMDC-125334	Pf3D7_14_v3	1380817	PF3D7_1434500	dynein-related AAA-type ATPase, putative	1127.1	ATCATTTTTGTCGTTTTTT	A	INDEL	disruptive_inframe_deletion		gaaaaaaacgacaaaaatgat/gat	p.Glu7277_Asn7282del/c.21831_21848delAAAAAACGACAAAAATGA	Clonal
