# Supplementary material for: Diverse evolutionary pathways challenge the use of collateral sensitivity as a strategy to suppress resistance
Source: eLife journal article supplement (doi:10.7554/elife.85023), 2023-09-22
Supplement: supp [file elife-85023-supp-v1.zip]

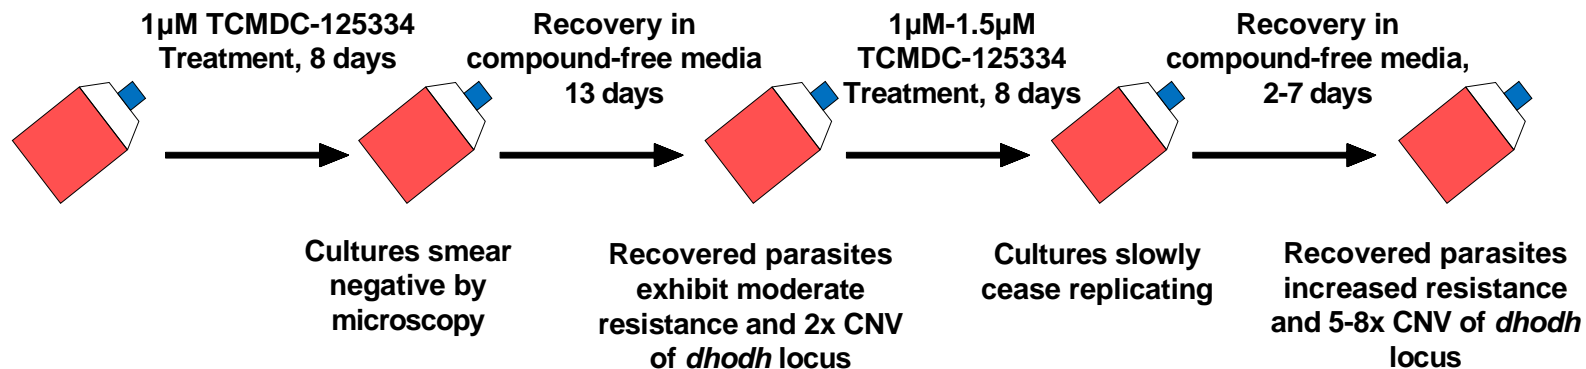

**Dose response of bulk selected populations reported as EC<sub>50</sub> (nM)  $\pm$  StDev (N)**

| Parasite Population | DHODH CNV | TCMDC-125334       | DSM265              | Genz669178          | IDI-6263            | ATV                  | DHA                |
|---------------------|-----------|--------------------|---------------------|---------------------|---------------------|----------------------|--------------------|
| 3D7 A10             | 1         | 106 $\pm$ 11.2 (5) | 3.1 $\pm$ 0.67 (4)  | 6.3 $\pm$ 1.0 (5)   | 462 $\pm$ 49.6 (5)  | 0.44 $\pm$ 0.088 (5) | 3.7 $\pm$ 0.55 (5) |
| Flask 1-Pulse 1     | 2         | 201 $\pm$ 52.0 (6) | 6.7 $\pm$ 0.63 (4)  | 11.0 $\pm$ 2.22 (6) | 868 $\pm$ 273 (6)   | 0.47 $\pm$ 0.17 (6)  | 2.8 $\pm$ 0.69 (6) |
| Flask 2-Pulse 1     | 2         | 188 $\pm$ 40.2 (6) | 6.6 $\pm$ 0.86 (4)  | 11.4 $\pm$ 2.83 (6) | 856 $\pm$ 224 (6)   | 0.53 $\pm$ 0.22 (6)  | 2.9 $\pm$ 0.71 (6) |
| Flask 3-Pulse 1     | 2         | 196 $\pm$ 20.5 (6) | 6.9 $\pm$ 0.32 (4)  | 12.7 $\pm$ 0.48 (6) | 903 $\pm$ 161 (6)   | 0.47 $\pm$ 0.22 (6)  | 2.7 $\pm$ 0.38 (6) |
| Flask 1-Pulse 2     | 6-11      | 391 $\pm$ 292 (3)  | 33.9 $\pm$ 10.1 (3) | 27.3 $\pm$ 21.5 (3) | 2260 $\pm$ 1410 (3) | 0.33 $\pm$ 0.085 (3) | 4.0 $\pm$ 2.2 (3)  |
| Flask 3-Pulse 2     | 6-11      | 528 $\pm$ 339 (7)  | 15.2 $\pm$ 12.0 (4) | 34.5 $\pm$ 21.2 (7) | 2461 $\pm$ 1655 (7) | 0.40 $\pm$ 0.18 (7)  | 3.0 $\pm$ 0.94 (7) |
