# Supplementary material for: Diverse evolutionary pathways challenge the use of collateral sensitivity as a strategy to suppress resistance
Source: eLife journal article supplement (doi:10.7554/elife.85023), 2023-09-22

**A.**

|         | Time on drug | Time to parasitemia first observed |
|---------|--------------|------------------------------------|
| Flask 1 | 9 days       | 7 days                             |
| Flask 2 | 9 days       | 7 days                             |
| Flask 3 | 9 days       | 7 days                             |

**B.**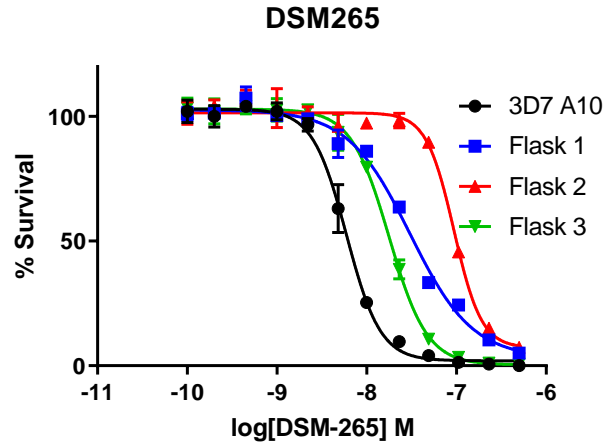

Supplement: supp [file elife-85023-supp-v1.zip]
