# Supplementary material for: Diverse evolutionary pathways challenge the use of collateral sensitivity as a strategy to suppress resistance
Source: eLife journal article supplement (doi:10.7554/elife.85023), 2023-09-22

DHODH front

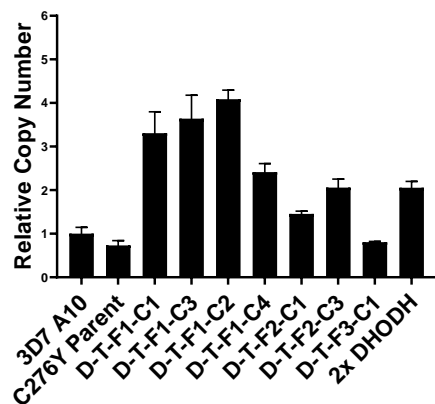

DHODH rear

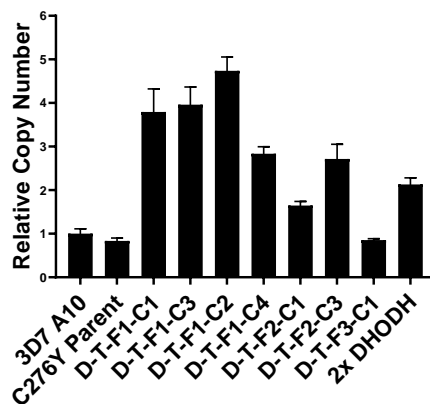

Seryl tRNA synthase

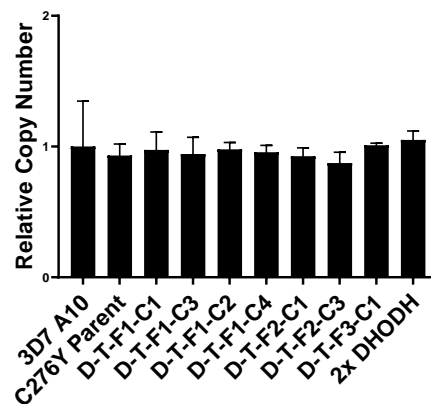

DHODH front

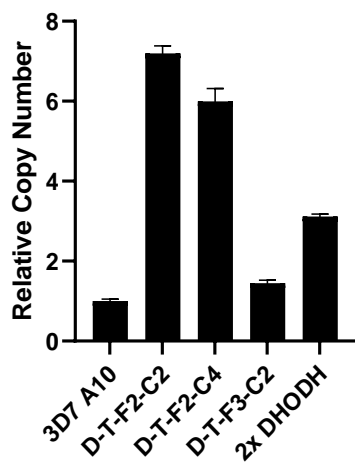

DHODH rear

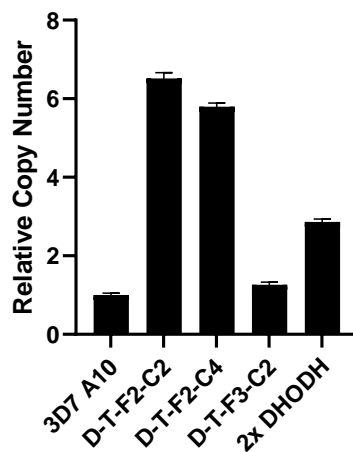

Seryl tRNA synthetase

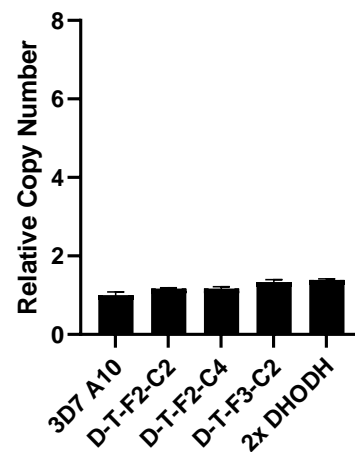

DHODH front

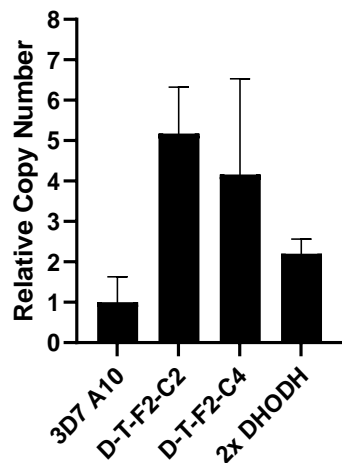

DHODH rear

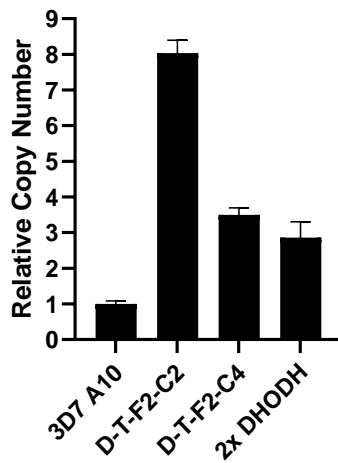

Seryl tRNA synthase

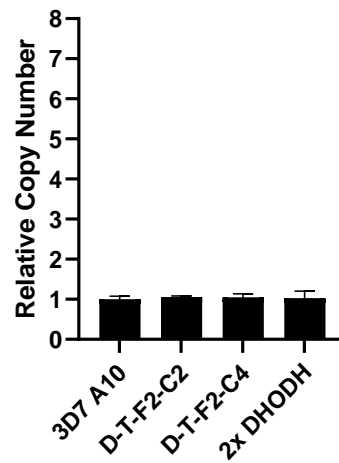

Supplement: supp [file elife-85023-supp-v1.zip]
