# Supplementary material for: Diverse evolutionary pathways challenge the use of collateral sensitivity as a strategy to suppress resistance
Source: eLife journal article supplement (doi:10.7554/elife.85023), 2023-09-22

830nM Pulse Treatment- Clonal Lines

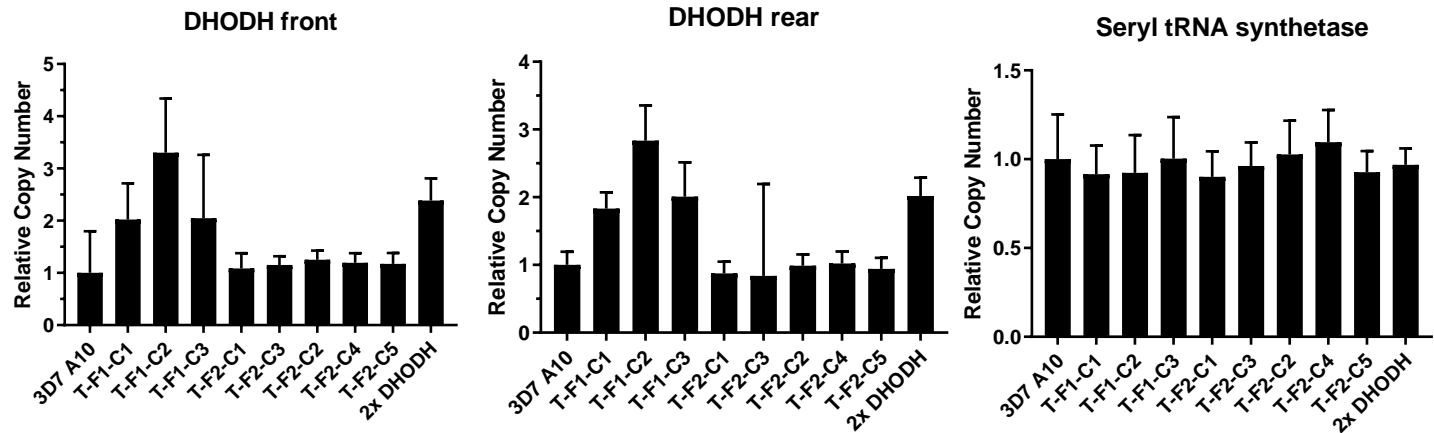

1μM Treatment (Round 1)- Bulk Populations

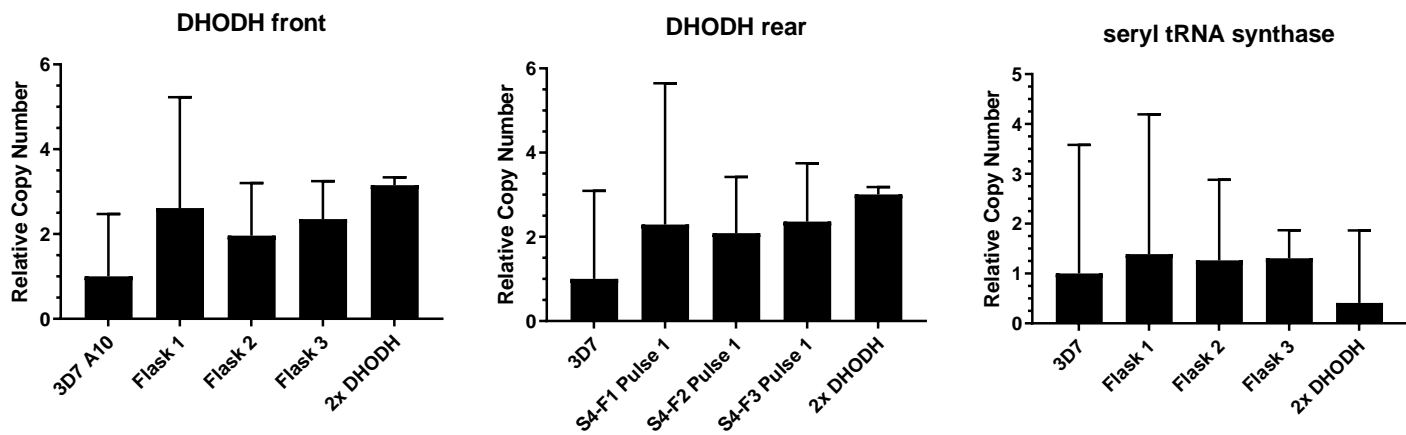

1μM Treatment (Round 2)- Bulk Populations

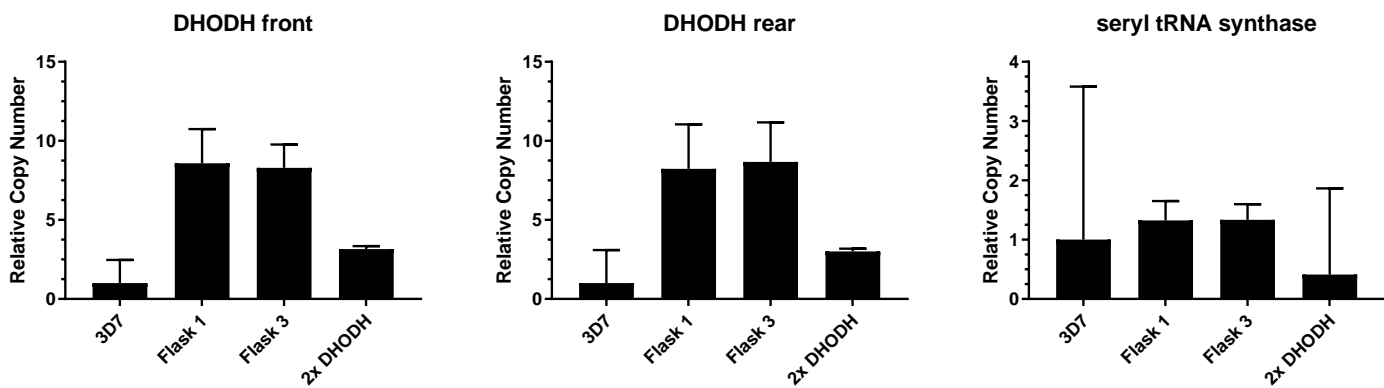

Supplement: supp [file elife-85023-supp-v1.zip]
