# Supplementary material for: Diverse evolutionary pathways challenge the use of collateral sensitivity as a strategy to suppress resistance
Source: eLife. 2023 Sep 22;12:e85023. doi: 10.7554/eLife.85023 (PMC10695565; doi:10.7554/eLife.85023)
Supplement: Table 1—source data 1. [file elife-85023-table1-data1.xlsx]

## Sheet: Sheet1
Table 1- Source Data 1. Individual bioreplicates of EC50 values (nM) obtained from dose response assays. Data is organized in tabs by figure/table of main manuscript
Clone	Biorep Number	TCMDC-125334	DSM265	IDI6273	Gen669178	Dihydroartemisinin	Atovaquone
3D7 A10	Biorep 1	73.7	3.27	216	3.04	2.58	0.34
	Biorep 2	92.3	3.41	356	4.78	4.85	0.609
	Biorep 3	118	3.5	391	5.32	3.88	0.388
	Biorep 4	184	7.09	790	10	1.69	0.792
	Biorep 5	206	5.4	704	10.1	4.68	0.774
	Biorep 6	98.6	3.23	376	6.81	2.81	0.35
	Biorep 7	107	3.13	387	6.19	3.42	0.434
	Biorep 8	128	3.67	466	7.26	3.46	0.469
	Biorep 9	159	6.25	991	10.5	4.87	0.891
	Biorep 10	111	N/A	521	5.38	4.47	0.537
	Biorep 11	110	3.13	430	7.68	3.33	0.412
	Biorep 12	89.5	2.4	413	6.42	3.29	0.329
	Biorep 13	114	3.73	484	5.68	3.6	0.47
	Biorep 14	163	N/A			2.34	0.508
	Biorep 15	187	6.71			4.04	0.735
	Biorep 16	145	4.1			2.81	0.206
	Biorep 17	191	6.27			2.53	0.304
	Biorep 18	199	4.27			2.94	0.389
	Biorep 19	186	6.82			3.75	0.512
T-F1-C1	Biorep 1	342	10.7	1240	24.3	4.14	0.611
	Biorep 2	310	8.29	917	15	2.41	0.335
	Biorep 3	188	5.53	821	11.3	2.09	0.41
T-F1-C2	Biorep 1	592	15.2	1840	37.1	4.44	0.587
	Biorep 2	319	10.7	1450	17.2	1.69	0.392
	Biorep 3	368	11.7	1500	26.8	2.76	0.405
T-F1-C3	Biorep 1	261	8.34	1060	12.2	1.4	0.566
	Biorep 2	300	9.08	1470	14	2.67	0.584
	Biorep 3	334	8.72	1460	26.7	2.37	0.624
T-F2-C1	Biorep 1	583	3.06	7540	43.6	4.01	0.356
	Biorep 2	366	2.71	6290	23.3	2.3	0.221
	Biorep 3	348	1.64	7340	13.1	2.12	0.214
T-F2-C2	Biorep 1	113	3.63	472	5.34	1.5	0.507
	Biorep 2	135	3.92	591	6.33	2.73	0.463
	Biorep 3	163	5.39	652	11.7	3.22	0.569
T-F2-C3	Biorep 1	181	5.99	620	12.4	4.5	0.594
	Biorep 2	290	N/A	414	7.28	3.79	0.477
	Biorep 3	150	3.66	511	7.27	2.54	0.452
	Biorep 4	187	2.68	N/A	4.68	2.56	2.07
T-F2-C4	Biorep 1	194	6.49	924	8.55	2.8	0.659
	Biorep 2	144	4.56	642	7.2	2.69	0.451
	Biorep 3	145	4.17	511	8.35	2.78	0.518
T-F2-C5	Biorep 1	117	3.96	379	10.6	4.08	0.286
	Biorep 2	149	3.05	370	4.64	1.68	0.312
	Biorep 3	162	2.28	463	4.48	3.16	N/A
	Biorep 4	199	2.86	N/A	4.69	1.33	N/A
