# Supplementary material for: Diverse evolutionary pathways challenge the use of collateral sensitivity as a strategy to suppress resistance
Source: eLife. 2023 Sep 22;12:e85023. doi: 10.7554/eLife.85023 (PMC10695565; doi:10.7554/eLife.85023)
Supplement: Table 1—source data 3. — Each entry represents a single clonal mutation that is present in the drug-selected clone but not in the matched parent line (i.e. arose during the drug selection process). [file elife-85023-table1-data3.xlsx]

## Sheet: Sheet1
Table 1- Source Data 3: Homozygous variants identified from in vitro selections by whole-genome sequencing. Each entry represents a single clonal mutation that is present in the drug-selected clone but not in the matched parent line (i.e. arose during the drug selection process).
Sample Name	Parent Line	Chromosome	Position	Gene_Name	Gene_Description	Quality	Ref_Base	Alt_Base	Type	Effect	Impact	Codon_Change	Amino_Acid_Change
TCMDC125334-3D7-T-F1-C1	3D7 A10 Parent	Pf3D7_10_v3	598916	PF3D7_1014800	conserved Plasmodium protein, unknown function	690.88	A	AAT	INDEL	intron_variant			c.755-28_755-27insAT
TCMDC125334-3D7-T-F1-C1	3D7 A10 Parent	Pf3D7_12_v3	430430	PF3D7_1209300	telomere repeat-binding zinc finger protein	22708.8	ACTTGCATCACTTCTTCGG	A	INDEL	disruptive_inframe_deletion		agccgaagaagtgatgcaagt/agt	p.Arg812_Ser817del/c.2433_2450delCCGAAGAAGTGATGCAAG
TCMDC125334-3D7-T-F1-C1	3D7 A10 Parent	Pf3D7_12_v3	1709660	PF3D7_1240400	erythrocyte membrane protein 1, PfEMP1 (VAR)	11343.8	A	ACACCAGCACCAG	INDEL	disruptive_inframe_insertion		cct/ccAGCACCAGCACCt	p.Pro1740_Ser1741insAlaProAlaPro/c.5208_5219dupAGCACCAGCACC
TCMDC125334-3D7-T-F1-C2	3D7 A10 Parent	Pf3D7_03_v3	1056064			735.88	A	T	SNP	intergenic_region
TCMDC125334-3D7-T-F1-C2	3D7 A10 Parent	Pf3D7_08_v3	1472707			5985.35	C	T	SNP	intergenic_region
TCMDC125334-3D7-T-F1-C2	3D7 A10 Parent	Pf3D7_12_v3	430430	PF3D7_1209300	telomere repeat-binding zinc finger protein	22708.8	ACTTGCATCACTTCTTCGG	A	INDEL	disruptive_inframe_deletion		agccgaagaagtgatgcaagt/agt	p.Arg812_Ser817del/c.2433_2450delCCGAAGAAGTGATGCAAG
TCMDC125334-3D7-T-F1-C2	3D7 A10 Parent	Pf3D7_12_v3	1709660	PF3D7_1240400	erythrocyte membrane protein 1, PfEMP1 (VAR)	11343.8	A	ACACCAGCACCAG	INDEL	disruptive_inframe_insertion		cct/ccAGCACCAGCACCt	p.Pro1740_Ser1741insAlaProAlaPro/c.5208_5219dupAGCACCAGCACC
TCMDC125334-3D7-T-F1-C3	3D7 A10 Parent	Pf3D7_07_v3	1015			3013.65	A	G	SNP	intergenic_region			n.1015A>G
TCMDC125334-3D7-T-F1-C3	3D7 A10 Parent	Pf3D7_12_v3	430430	PF3D7_1209300	telomere repeat-binding zinc finger protein	22708.8	ACTTGCATCACTTCTTCGG	A	INDEL	disruptive_inframe_deletion		agccgaagaagtgatgcaagt/agt	p.Arg812_Ser817del/c.2433_2450delCCGAAGAAGTGATGCAAG
TCMDC125334-3D7-T-F1-C3	3D7 A10 Parent	Pf3D7_12_v3	1709660	PF3D7_1240400	erythrocyte membrane protein 1, PfEMP1 (VAR)	11343.8	A	ACACCAGCACCAG	INDEL	disruptive_inframe_insertion		cct/ccAGCACCAGCACCt	p.Pro1740_Ser1741insAlaProAlaPro/c.5208_5219dupAGCACCAGCACC
TCMDC125334-3D7-T-F1-C3	3D7 A10 Parent	Pf3D7_14_v3	983347	PF3D7_1425200	enoyl-CoA hydratase, putative	1131.38	AT	A	INDEL	frameshift_variant		aat/	p.Asn405fs/c.1214delA
TCMDC125334-3D7-T-F2-C1	3D7 A10 Parent	Pf3D7_03_v3	1066799			6857.74	C	T	SNP	intergenic_region
TCMDC125334-3D7-T-F2-C1	3D7 A10 Parent	Pf3D7_03_v3	1066806			6406.74	T	C	SNP	intergenic_region
TCMDC125334-3D7-T-F2-C1	3D7 A10 Parent	Pf3D7_06_v3	131251	PF3D7_0603300	dihydroorotate dehydrogenase, mitochondrial precursor (DHODH)	11600.7	A	C	SNP	missense_variant	MISSENSE	aTt/aGt	p.Ile263Ser/c.788T>G
TCMDC125334-3D7-T-F2-C1	3D7 A10 Parent	Pf3D7_07_v3	278717			9910.91	T	TTATG	INDEL	intergenic_region			n.278717_278718insTATG
TCMDC125334-3D7-T-F2-C2	3D7 A10 Parent	Pf3D7_05_v3	831563			1154.59	AATATAT	A	INDEL	intergenic_region			n.831564_831569delATATAT
TCMDC125334-3D7-T-F2-C2	3D7 A10 Parent	Pf3D7_07_v3	278717			9910.91	T	TTATG	INDEL	intergenic_region			n.278717_278718insTATG
TCMDC125334-3D7-T-F2-C2	3D7 A10 Parent	Pf3D7_09_v3	640036	PF3D7_0915000	type II NADH :Aubiquinone oxidoreductase (NDH2)	9019.94	AT	A	INDEL	frameshift_variant		aat/	p.Asn408fs/c.1223delA
TCMDC125334-3D7-T-F2-C3	3D7 A10 Parent	no clonal mutations
TCMDC125334-3D7-T-F2-C4	3D7 A10 Parent	Pf3D7_03_v3	330349	PF3D7_0307700	conserved Plasmodium protein, unknown function	17688.7	T	A	SNP	missense_variant	MISSENSE	caA/caT	p.Gln1496His/c.4488A>T
TCMDC125334-3D7-T-F2-C4	3D7 A10 Parent	Pf3D7_03_v3	330352	PF3D7_0307700	conserved Plasmodium protein, unknown function	18739.7	A	G	SNP	synonymous_variant	SILENT	gaT/gaC	p.Asp1495Asp/c.4485T>C
TCMDC125334-3D7-T-F2-C4	3D7 A10 Parent	Pf3D7_03_v3	330354	PF3D7_0307700	conserved Plasmodium protein, unknown function	18629.7	C	T	SNP	missense_variant	MISSENSE	Gat/Aat	p.Asp1495Asn/c.4483G>A
TCMDC125334-3D7-T-F2-C4	3D7 A10 Parent	Pf3D7_03_v3	330357	PF3D7_0307700	conserved Plasmodium protein, unknown function	18664.7	A	ATTG	INDEL	inframe_insertion		cag/cagCAA	p.Gln1493dup/c.4479_4480insCAA
TCMDC125334-3D7-T-F2-C4	3D7 A10 Parent	Pf3D7_03_v3	330360	PF3D7_0307700	conserved Plasmodium protein, unknown function	17456.7	GAGC	G	INDEL	inframe_deletion		gct/	p.Ala1492del/c.4474_4476delGCT
TCMDC125334-3D7-T-F2-C4	3D7 A10 Parent	Pf3D7_05_v3	735545			751.8	C	CATAA	INDEL	intergenic_region			n.735545_735546insATAA
TCMDC125334-3D7-T-F2-C4	3D7 A10 Parent	Pf3D7_07_v3	278717			9910.91	T	TTATG	INDEL	intergenic_region			n.278717_278718insTATG
TCMDC125334-3D7-T-F2-C4	3D7 A10 Parent	Pf3D7_08_v3	1472652			3059.36	AG	A	INDEL	intergenic_region
TCMDC125334-3D7-T-F2-C4	3D7 A10 Parent	Pf3D7_09_v3	640036	PF3D7_0915000	type II NADH :Aubiquinone oxidoreductase (NDH2)	9019.94	AT	A	INDEL	frameshift_variant		aat/	p.Asn408fs/c.1223delA
TCMDC125334-3D7-T-F2-C5	3D7 A10 Parent	Pf3D7_03_v3	1066694			3630.01	T	C	SNP	intergenic_region
TCMDC125334-3D7-T-F2-C5	3D7 A10 Parent	Pf3D7_06_v3	506223			982.47	A	AT	INDEL	intergenic_region			n.506223_506224insT
TCMDC125334-3D7-T-F2-C5	3D7 A10 Parent	Pf3D7_07_v3	284060	PF3D7_0705600	RNA helicase, putative	3233.06	A	ATATTAT	INDEL	inframe_insertion		att/aATAATAtt	p.Asn123_Asn124dup/c.368_373dupATAATA
