# Supplementary material for: Diverse evolutionary pathways challenge the use of collateral sensitivity as a strategy to suppress resistance
Source: eLife. 2023 Sep 22;12:e85023. doi: 10.7554/eLife.85023 (PMC10695565; doi:10.7554/eLife.85023)
Supplement: Table 2—source data 1. — Data is organized in tabs by figure/table of main manuscript. [file elife-85023-table2-data1.xlsx]

## Sheet: Sheet1
Table 2- Source Data 1. Individual bioreplicates of EC50 values (nM) obtained from dose response assays. Data is organized in tabs by figure/table of main manuscript
Clone	Biorep Number	TCMDC-125334	DSM265	IDI6273	Gen669178	Dihydroartemisinin	Atovaquone
3D7 A10	Biorep 1	73.7	3.27	216	3.04	2.58	0.34
	Biorep 2	92.3	3.41	356	4.78	4.85	0.609
	Biorep 3	118	3.5	391	5.32	3.88	0.388
	Biorep 4	184	7.09	790	10	1.69	0.792
	Biorep 5	206	5.4	704	10.1	4.68	0.774
	Biorep 6	98.6	3.23	376	6.81	2.81	0.35
	Biorep 7	107	3.13	387	6.19	3.42	0.434
	Biorep 8	128	3.67	466	7.26	3.46	0.469
	Biorep 9	159	6.25	991	10.5	4.87	0.891
	Biorep 10	111	N/A	521	5.38	4.47	0.537
	Biorep 11	110	3.13	430	7.68	3.33	0.412
	Biorep 12	89.5	2.4	413	6.42	3.29	0.329
	Biorep 13	114	3.73	484	5.68	3.6	0.47
	Biorep 14	163	N/A			2.34	0.508
	Biorep 15	187	6.71			4.04	0.735
	Biorep 16	145	4.1			2.81	0.206
	Biorep 17	191	6.27			2.53	0.304
	Biorep 18	199	4.27			2.94	0.389
	Biorep 19	186	6.82			3.75	0.512	140.111	4.49294	501.923	6.85846	3.43895	0.497316
DHODH C276Y Parent*	Biorep 2	10.6	43.2	68	25.1	2.96	0.511
	Biorep 3	N/A	47	39.9	32.4	1.49	0.393
	Biorep 4	N/A	40.3	38	22.3	1.66	0.421
	Biorep 5	N/A	60	46	27.3	1.52	0.484
	Biorep 6	8.91	N/A	29.6	15.7	2.73	0.525
	Biorep 7	9.33	N/A	37.3	15.2	2.15	0.473
	Biorep 8	8.92	N/A	33	16	3.52	0.417
	Biorep 9	13.8				1.91	0.312
	Biorep 10	15.2	82.6			3.48	0.292
	Biorep 11	11.5	70.8			2.61	0.22
	Biorep 12	17.2	92.5			2.72	0.319
	Biorep 13	12.2	52			2.52	0.342
	Biorep 14	16.3	86.4			3.32	0.498	12.396	63.8667	41.6857	22	2.50692	0.400538
C276Y-D-T-F1-C1	Biorep 1	53.9	>200	213	>200	1.53	0.66
	Biorep 2	35.2	>100	144	>200	1.91	0.469
	Biorep 3	44.9	>200	197	>200	2.17	0.712
	Biorep 4	45.2	399			2.14	0.292
	Biorep 5	69	600			2.83	0.75
	Biorep 6	51.3	326			2.69	0.607
	Biorep 7	52.3	432			3.91	0.572	50.2571	439.25	184.667	#DIV/0!	2.45429	0.580286
C276Y-D-T-F1-C2	Biorep 1	93.8	>400	391	>200	3.97	1.02
	Biorep 2	59.9	>100	272	>100	3.94	0.825
	Biorep 3	86.8	>200	373	>400	3.67	1.27
	Biorep 4	58.7	578			2.43	0.331
	Biorep 5	78.9	843			2.68	0.805
	Biorep 6	76.2	527			3.7	1.04
	Biorep 7	57	494			3.35	0.524	73.0429	610.5	345.333	#DIV/0!	3.39143	0.830714
C276Y-D-T-F1-C3	Biorep 1	49.9	>200	245	>200	3.31	0.805
	Biorep 2	54.6	>200	219	>200	2.81	0.827
	Biorep 3	33.2	158	133	129	1.15	0.548
C276Y-D-T-F1-C4	Biorep 1	54.1	>200	176	>200	2.96	0.57
	Biorep 2	33.7	>100	104	>100	2.51	0.388
	Biorep 3	75.6	>400	293	>200	5.81	1.41
C276Y-D-T-F2-C1	Biorep 1	30.2	>100	100	94.2	2.99	0.517
	Biorep 2	33.2	>100	127	106	3.69	0.689
	Biorep 3	43.9	>100	186	151	6.02	0.904
	Biorep 4	24.7	165			2.71	0.315
	Biorep 5	34.4	240			2.97	0.621
	Biorep 6	23.8	131			2.46	0.384
	Biorep 7	27.8	246			1.91	0.479	31.1429	195.5	137.667	117.067	3.25	0.558429
C276Y-D-T-F2-C2	Biorep 1	78.5	>400	319	>200	3.2	0.706
	Biorep 2	49.5	>200	175	>200	2.83	0.235
	Biorep 3	130	>200	485	>200	4.6	1.82
	Biorep 4	63.9	611			2.15	43*
	Biorep 5	64.8	638			2.19	1.67
	Biorep 6	70.8	872			3.61	1
	Biorep 7	72	807			3.46	1.07
	Biorep 8	60	580			2.3	0.344
	Biorep 9	105	1300			3.58	1.58	77.1667	801.333	326.333	#DIV/0!	3.10222	1.05313
C276Y-D-T-F2-C3	Biorep 1	51.6	>100	165	>100	3.1	1.04
	Biorep 2	40.9	>100	176	>100	4.32	0.821
	Biorep 3	36.4	>100	152	>100	2.78	0.72
C276Y-D-T-F2-C4	Biorep 1	65.5	>400	262	>200	2.92	0.683
	Biorep 2	88.7	>400	268	>200	3.38	0.888
	Biorep 3	47.5	263	188	156	1.38	0.44
	Biorep 4	39	362	210	238	1.38	0.318
C276Y-D-T-F3-C1	Biorep 1	81.7	>100	198	41.2	1.92	0.204
	Biorep 2	56.6	N/A	122	74.1	2.46	0.135
	Biorep 3	36.8	> 499	123	69.3	2.78	0.204
	Biorep 4	57.8	7703	188	80	1.55	0.209
	Biorep 5	50.6	7400	150	79.3	1.62	0.25
	Biorep 6	62.9	8300	199	74.3	1.41	0.373
	Biorep 7	68.4	10200			2.36	0.121
	Biorep 8	122	15300			3.62	0.225
	Biorep 9	57.2	6450			2.56	0.19
	Biorep 10	62.1	7940			4.27	0.215	65.61	9041.86	163.333	69.7	2.455	0.2126
C276Y-D-T-F3-C2	Biorep 1	79.1	>500	173	81.9	4.44	0.309
	Biorep 2	114	>500	302	174	4.43	0.317
	Biorep 3	50.1	>500	154	84.3	2.22	0.196
	Biorep 4	45.5	5070	104	46.2	1.23	0.143
	Biorep 5	75.2	11600			2.41	0.137
	Biorep 6	120	14300			3.65	0.277
	Biorep 7	57.3	6630			2.58	0.183
	Biorep 8	69.4	12200			3.89	0.238	76.325	9960	183.25	96.6	3.10625	0.225
C276Y-D-T-F3-C3	Biorep 1	68.1	>500	170	72.7	3.14	0.285
	Biorep 2	51.5	>500	160	139	3.14	0.228
	Biorep 3	49.5	>500	156	89.6	1.87	0.191
	Biorep 4	45.3	>500	208	60.8	6.96	0.242
DHODH F227Y*	Biorep 1	395	965	2000	21.2	1.62	0.254
	Biorep 2	420	1030	2410	16.4	1.68	0.28
	Biorep 3	599	1520	3500	26.7	2.05	0.353
*Previously selected with DSM265 or DSM267; reference: Mandt et al. Science Translational Medicine DOI: 10.1126/scitranslmed.aav1636
