# Supplementary material for: Diverse evolutionary pathways challenge the use of collateral sensitivity as a strategy to suppress resistance
Source: eLife. 2023 Sep 22;12:e85023. doi: 10.7554/eLife.85023 (PMC10695565; doi:10.7554/eLife.85023)
Supplement: Table 2—source data 2. — Denoised log2 copy ratios were calculated across the genic intervals of the full genome for all sequenced samples. Values were calculated using the GATK4.0 CNV detection pipeline. [file elife-85023-table2-data2.xlsx]

## Sheet: Sheet1
Table 2- Source Data 2. Copy number variation analysis based on whole-genome sequencing. Denoised log2 copy ratios were calculated across the genic intervals of the full genome for all sequenced samples. Values were calculated using the GATK4.0 CNV detection pipeline.
Chromosome	Contig_Start	Contig_End	Chromosome	Gene_ID	Gene_Description	DHODH C276Y Parent	TCMDC125334-C276Y-T-F1-C1	TCMDC125334-C276Y-T-F1-C3	TCMDC125334-C276Y-T-F1-C2	TCMDC125334-C276Y-T-F1-C4	TCMDC125334-C276Y-T-F2-C1	TCMDC125334-C276Y-T-F2-C3	TCMDC125334-C276Y-T-F2-C2	TCMDC125334-C276Y-T-F2-C4	TCMDC125334-C276Y-T-F3-C1	TCMDC125334-C276Y-T-F3-C2	TCMDC125334-C276Y-T-F3-C3
Pf3D7_01_v3	29260	37376	Pf3D7_01_v3	PF3D7_0100100	erythrocyte membrane protein 1, PfEMP1	-0.023415	0.060804	0.186568	-0.034677	-0.014276	0.016948	-0.02706	-0.005579	0.181302	0.185833	0.132603	0.181302
Pf3D7_01_v3	42117	46757	Pf3D7_01_v3	PF3D7_0100300	erythrocyte membrane protein 1, PfEMP1	-0.073809	0.027099	0.232865	-0.062194	-0.025942	-0.048663	0.072156	-0.045079	0.174187	0.246562	0.107372	0.174187
Pf3D7_01_v3	50113	51886	Pf3D7_01_v3	PF3D7_0100400	rifin	-0.074601	0.031595	0.182834	-0.114034	-0.042073	-0.010862	-0.038452	-0.065944	0.029047	0.154639	0.009068	0.029047
Pf3D7_01_v3	53530	55256	Pf3D7_01_v3	PF3D7_0100600	rifin	-0.113613	0.056058	0.190784	-0.039642	0.025436	0.064827	0.019842	0.006182	0.150064	0.184846	0.085435	0.150064
Pf3D7_01_v3	59522	61253	Pf3D7_01_v3	PF3D7_0100800	rifin	0.045573	0.059541	0.282189	0.059839	0.064053	0.076966	0.030885	0.045156	0.166522	0.147055	0.172068	0.166522
Pf3D7_01_v3	61937	63650	Pf3D7_01_v3	PF3D7_0100900	rifin	-0.088404	0.033672	0.191478	-0.032801	-0.031088	-0.037626	-0.057596	-0.033178	0.065919	0.220317	0.053985	0.065919
Pf3D7_01_v3	81515	83356	Pf3D7_01_v3	PF3D7_0101600	rifin	-0.027951	-0.000999	0.275416	0.01676	0.012225	0.075899	0.049725	-0.022588	0.165734	0.21052	0.141749	0.165734
Pf3D7_01_v3	89992	91670	Pf3D7_01_v3	PF3D7_0101900	rifin	-0.026199	-0.016156	0.341694	0.019697	-0.007532	0.043405	-0.031101	-0.010342	0.135921	0.100644	0.103483	0.135921
Pf3D7_01_v3	92863	94125	Pf3D7_01_v3	PF3D7_0102000	Plasmodium exported protein (PHISTa), unknown function, pseudogene	-0.055617	0.066155	0.343602	0.030722	0.07609	0.057585	0.072773	-0.034404	0.24393	0.163294	0.203521	0.24393
Pf3D7_01_v3	94800	96149	Pf3D7_01_v3	PF3D7_0102100	stevor, pseudogene	-0.020459	0.020028	0.355536	0.062508	0.022837	0.098893	-0.007116	-0.041603	0.19829	0.285684	0.217436	0.19829
Pf3D7_01_v3	98569	102532	Pf3D7_01_v3	PF3D7_0102200	ring-infected erythrocyte surface antigen	0.034981	0.055092	0.320017	0.024354	0.07351	0.117713	0.089949	0.070056	0.191477	0.05824	0.227759	0.191477
Pf3D7_01_v3	104454	105459	Pf3D7_01_v3	PF3D7_0102300	Plasmodium exported protein, unknown function	-0.040519	-0.140173	0.008015	-0.102087	-0.0063	-0.023548	-0.037726	-0.09269	0.062073	-0.023497	0.056238	0.062073
Pf3D7_01_v3	106947	108598	Pf3D7_01_v3	PF3D7_0102400	lysophospholipase, putative, pseudogene	-0.021988	-0.013782	-0.012169	-0.068718	-0.06854	-0.00633	0.011611	0.004364	0.02821	0.012609	0.029669	0.02821
Pf3D7_01_v3	110500	116049	Pf3D7_01_v3	PF3D7_0102500	erythrocyte binding antigen-181	0.020097	0.030235	0.083471	0.015363	0.028783	0.040707	-0.028638	0.005669	0.123279	0.119295	0.1034	0.123279
Pf3D7_01_v3	118791	121499	Pf3D7_01_v3	PF3D7_0102600	serine/threonine protein kinase, FIKK family	0.016697	-0.023188	-0.053302	-0.109827	-0.059267	0.002923	0.129046	-0.037593	-0.074148	-0.010432	0.130524	-0.074148
Pf3D7_01_v3	124267	125734	Pf3D7_01_v3	PF3D7_0102700	merozoite-associated tryptophan-rich antigen	0.022915	0.009787	0.070295	0.03584	0.024123	0.020933	0.095815	0.036723	0.09931	0.017952	0.078695	0.09931
Pf3D7_01_v3	126068	128391	Pf3D7_01_v3	PF3D7_0102800	seipin domain-containing protein, putative	0.018764	0.055139	0.12474	0.01451	0.045836	0.051934	0.036535	0.078008	0.138335	0.094479	0.10623	0.138335
Pf3D7_01_v3	128710	131090	Pf3D7_01_v3	PF3D7_0102900	aspartate--tRNA ligase	-0.027111	-0.047503	0.01053	-0.008307	-0.000399	-0.052867	-0.013136	-0.023867	-0.042303	-0.027442	0.007652	-0.042303
Pf3D7_01_v3	131836	133874	Pf3D7_01_v3	PF3D7_0103000	vacuolar protein sorting-associated protein VTA1, putative	0.050325	-0.011526	0.002376	0.05928	0.065289	0.004119	-0.006041	0.060545	0.041679	0.207543	0.05399	0.041679
Pf3D7_01_v3	134103	139507	Pf3D7_01_v3	PF3D7_0103100	vacuolar protein sorting-associated protein 51, putative	0.018277	-0.098626	-0.090092	-0.042855	-0.000396	0.014579	-0.057079	-0.043734	-0.039184	-0.103556	0.012035	-0.039184
Pf3D7_01_v3	140412	142469	Pf3D7_01_v3	PF3D7_0103200	nucleoside transporter 4	-0.001336	-0.00616	0.055596	-0.072608	-0.026344	-0.002658	0.028192	0.009388	-0.009477	0.136915	0.050494	-0.009477
Pf3D7_01_v3	143390	146646	Pf3D7_01_v3	PF3D7_0103300	conserved protein, unknown function	-0.00088	0.006915	0.067754	0.063035	-0.034545	-0.016266	0.020199	0.061785	0.038806	0.098664	0.068634	0.038806
Pf3D7_01_v3	147665	153027	Pf3D7_01_v3	PF3D7_0103400	zinc-carboxypeptidase, putative	0.045235	-0.048337	-0.060187	-0.006129	-0.004937	-0.034079	-0.029631	0.001948	-0.074751	-0.08212	-0.004903	-0.074751
Pf3D7_01_v3	153926	160676	Pf3D7_01_v3	PF3D7_0103500	conserved Plasmodium protein, unknown function	0.002777	-0.02962	0.005228	0.035026	-0.015006	-0.060661	0.046782	0.021824	-0.011381	-0.085718	-0.007875	-0.011381
Pf3D7_01_v3	160881	166371	Pf3D7_01_v3	PF3D7_0103600	ATP-dependent RNA helicase, putative	-0.05217	-0.036908	-0.048759	-0.062917	-0.066117	-0.055673	0.011063	-0.013597	-0.061288	0.037616	-0.004953	-0.061288
Pf3D7_01_v3	166372	168883	Pf3D7_01_v3	PF3D7_0103700	L-seryl-tRNA(Sec) kinase, putative	-0.022987	-0.028029	0.003654	-0.041538	0.002531	-0.016793	-0.043348	0.003622	0.002237	0.023677	0.011889	0.002237
Pf3D7_01_v3	168884	171523	Pf3D7_01_v3	PF3D7_0103800	actin-related protein	0.004589	-0.076706	-0.051506	-0.040428	-0.028175	-0.05308	-0.046921	-0.069085	-0.034337	-0.116079	-0.052199	-0.034337
Pf3D7_01_v3	172614	174841	Pf3D7_01_v3	PF3D7_0103900	parasite-infected erythrocyte surface protein	0.067473	-0.052701	-0.001171	-0.008788	-0.008498	-0.050362	-0.044455	0.014742	0.044706	-0.089714	0.047183	0.044706
Pf3D7_01_v3	175359	176626	Pf3D7_01_v3	PF3D7_0104000	thrombospondin-related sporozoite protein	0.022212	0.041436	-0.025665	-0.055388	0.020212	-0.047955	-0.028979	0.001827	0.006703	-0.069826	-0.060835	0.006703
Pf3D7_01_v3	177837	181040	Pf3D7_01_v3	PF3D7_0104100	conserved Plasmodium membrane protein, unknown function	0.089169	0.066974	0.124619	0.083542	0.044959	0.098679	0.030595	0.0575	0.072568	0.059507	0.020768	0.072568
Pf3D7_01_v3	182572	184472	Pf3D7_01_v3	PF3D7_0104200	StAR-related lipid transfer protein	-0.094281	-0.168218	-0.02403	-0.082309	-0.057186	-0.078665	-0.019571	-0.084946	-0.081714	-0.163625	-0.142383	-0.081714
Pf3D7_01_v3	190019	201480	Pf3D7_01_v3	PF3D7_0104300	ubiquitin carboxyl-terminal hydrolase 1, putative	0.022122	0.12295	0.037534	0.042618	-0.118244	-0.019367	0.102878	0.03592	0.085215	-0.027323	0.065883	0.085215
Pf3D7_01_v3	202286	204382	Pf3D7_01_v3	PF3D7_0104400	4-hydroxy-3-methylbut-2-enyl diphosphate reductase	-0.043012	-0.091466	-0.049525	-0.075401	-0.106973	-0.076934	-0.094722	-0.062915	-0.009971	-0.033663	-0.013578	-0.009971
Pf3D7_01_v3	204383	205705	Pf3D7_01_v3	PF3D7_0104500	conserved protein, unknown function	0.027116	0.036193	0.074204	0.074034	0.026321	0.025159	-0.05008	-0.048646	0.097175	0.038381	0.05184	0.097175
Pf3D7_01_v3	205920	210439	Pf3D7_01_v3	PF3D7_0104600	conserved Plasmodium protein, unknown function	0.009289	-0.06571	0.001252	-0.044775	-0.023277	-0.049884	0.002769	-0.016345	0.005896	-0.011286	0.018724	0.005896
Pf3D7_01_v3	210620	213255	Pf3D7_01_v3	PF3D7_0104700	major facilitator superfamily-related transporter, putative	-0.049909	-0.040296	0.001414	-0.03655	-0.010615	-0.040795	-0.009988	0.007633	0.02939	-0.0578	-0.013116	0.02939
Pf3D7_01_v3	215526	217759	Pf3D7_01_v3	PF3D7_0104800	novel putative transporter 1, putative	-0.033878	-0.126257	-0.022736	-0.092243	-0.073833	0.047906	-0.094412	-0.032887	-0.041455	-0.007224	-0.029934	-0.041455
Pf3D7_01_v3	220952	221883	Pf3D7_01_v3	PF3D7_0105100	conserved Apicomplexan protein, unknown function	-0.021345	-0.1382	-0.044678	-0.105134	-0.094689	-0.104847	-0.059848	-0.048012	-0.031876	-0.154591	-0.04501	-0.031876
Pf3D7_01_v3	222004	224210	Pf3D7_01_v3	PF3D7_0105200	heptatricopeptide repeat and RAP domain-containing protein, putative	-0.039623	-0.049269	-0.014477	-0.098526	-0.020922	-0.046769	0.010532	0.007465	-0.026704	0.038211	-0.020642	-0.026704
Pf3D7_01_v3	224860	226029	Pf3D7_01_v3	PF3D7_0105300	cyclase-associated protein	0.013367	-0.019998	-0.011098	0.004363	0.002893	0.017451	0.016632	0.025857	0.041136	-0.050017	0.023853	0.041136
Pf3D7_01_v3	226431	227535	Pf3D7_01_v3	PF3D7_0105400	conserved Plasmodium protein, unknown function	0.19188	0.079009	-0.041784	0.00229	0.101631	0.016155	0.061325	0.159714	-0.0005	0.081408	0.022847	-0.0005
Pf3D7_01_v3	228235	229769	Pf3D7_01_v3	PF3D7_0105500	conserved protein, unknown function	3.9e-05	0.016675	0.026142	-0.02791	-3.5e-05	-0.017878	-0.054633	-0.051536	-0.021184	0.036156	0.040558	-0.021184
Pf3D7_01_v3	230039	234652	Pf3D7_01_v3	PF3D7_0105600	conserved Plasmodium protein, unknown function	-0.028128	-0.021724	0.023211	-0.055602	-0.012264	-0.085536	0.036022	-0.036048	-0.040522	0.041102	0.116241	-0.040522
Pf3D7_01_v3	238416	248107	Pf3D7_01_v3	PF3D7_0105700	asparagine-rich antigen Pfa35-2	-0.000734	-0.161281	-0.016583	-0.10609	-0.117015	-0.041186	-0.044617	-0.024727	-0.105163	-0.292923	-0.00314	-0.105163
Pf3D7_01_v3	248981	252260	Pf3D7_01_v3	PF3D7_0105800	cyclin-dependent kinases regulatory subunit, putative	0.058757	0.053346	0.007921	-0.017742	-0.019524	-0.010265	-0.038613	0.029061	-0.016912	0.078462	0.012601	-0.016912
Pf3D7_01_v3	253334	255180	Pf3D7_01_v3	PF3D7_0105900	3'-5' exonuclease, putative	0.078532	-0.020881	0.016631	0.011073	0.016088	-0.032195	0.016609	0.046979	0.002436	0.002813	0.001421	0.002436
Pf3D7_01_v3	255525	258793	Pf3D7_01_v3	PF3D7_0106000	conserved protein, unknown function	0.02078	0.001716	-0.012844	-0.01027	-0.017507	-0.038599	0.028121	0.004119	0.024159	-0.00262	-0.006987	0.024159
Pf3D7_01_v3	260408	262059	Pf3D7_01_v3	PF3D7_0106100	V-type proton ATPase subunit C, putative	-0.003846	0.060441	-0.095046	-0.016053	-0.028339	-0.028483	0.009907	0.002749	-0.070371	-0.018897	-0.059246	-0.070371
Pf3D7_01_v3	263090	264473	Pf3D7_01_v3	PF3D7_0106200	EF hand domain-containing protein, putative	-0.007317	-0.000297	0.016079	0.015311	0.0168	-0.053111	0.078379	-0.002293	-0.006717	0.065671	-0.001648	-0.006717
Pf3D7_01_v3	264958	269423	Pf3D7_01_v3	PF3D7_0106300	calcium-transporting ATPase	0.0442	0.042122	-0.008983	0.074263	-0.003824	-0.029806	0.030679	0.070437	0.014025	0.009463	0.001349	0.014025
Pf3D7_01_v3	272204	273654	Pf3D7_01_v3	PF3D7_0106400	pre-rRNA-processing protein TSR2, putative	-0.064611	-0.074873	-0.031517	-0.069767	-0.07712	-0.069745	-0.042028	-0.088653	-0.084958	-0.054303	-0.055941	-0.084958
Pf3D7_01_v3	274065	278800	Pf3D7_01_v3	PF3D7_0106500	conserved Plasmodium protein, unknown function	-0.052787	0.07605	0.010054	-0.053268	-0.040239	-0.063986	-0.060357	0.043688	-0.053311	-0.054189	0.01808	-0.053311
Pf3D7_01_v3	278865	280264	Pf3D7_01_v3	PF3D7_0106600	conserved Plasmodium protein, unknown function	-0.033298	-0.011932	0.050931	0.026995	0.00334	0.002613	-0.029177	-0.031602	0.005841	-0.005803	-0.016035	0.005841
Pf3D7_01_v3	280905	285709	Pf3D7_01_v3	PF3D7_0106700	small ribosomal subunit assembling AARP2 protein	0.020341	-0.011152	-0.016192	-0.038083	0.033412	0.09475	-0.108264	-0.071064	0.105945	-0.137841	0.028887	0.105945
Pf3D7_01_v3	286701	289168	Pf3D7_01_v3	PF3D7_0106800	ras-related protein Rab-5C	0.028027	0.006814	-0.026389	0.014128	-0.030758	0.031176	0.063632	0.000794	0.007195	-0.041823	0.022329	0.007195
Pf3D7_01_v3	290136	292840	Pf3D7_01_v3	PF3D7_0106900	2-C-methyl-D-erythritol 4-phosphate cytidylyltransferase, putative	0.082838	0.038314	0.000341	0.000711	0.03976	0.025493	0.060638	-0.040553	0.03566	0.035587	0.028226	0.03566
Pf3D7_01_v3	293392	295134	Pf3D7_01_v3	PF3D7_0107000	centrin-1	0.000535	0.056694	0.073232	-0.00356	0.059032	0.064284	0.058529	0.057575	-0.004484	0.05298	0.031005	-0.004484
Pf3D7_01_v3	295135	297146	Pf3D7_01_v3	PF3D7_0107100	conserved protein, unknown function	0.002551	-0.007032	-0.025394	-0.060484	0.034213	0.011815	-0.037096	0.001506	-0.015226	0.032841	-0.00941	-0.015226
Pf3D7_01_v3	297147	299479	Pf3D7_01_v3	PF3D7_0107200	CCR4 domain-containing protein 3, putative	0.014003	-0.033144	-0.041925	-0.011373	-0.04605	0.002298	0.038525	0.014651	0.018117	-0.127683	-0.043054	0.018117
Pf3D7_01_v3	299480	301118	Pf3D7_01_v3	PF3D7_0107300	conserved Plasmodium protein, unknown function	0.203788	0.160156	0.160331	0.166841	0.13803	0.25436	0.112953	0.108639	0.138761	0.098518	0.172107	0.138761
Pf3D7_01_v3	302687	303648	Pf3D7_01_v3	PF3D7_0107400	ATP synthase-associated protein, putative	0.003653	-0.003899	-0.022861	-0.01667	-0.002164	0.030138	-0.004017	0.000255	0.055745	-0.078454	0.039296	0.055745
Pf3D7_01_v3	304112	309507	Pf3D7_01_v3	PF3D7_0107500	Niemann-Pick type C1-related protein	0.032356	0.009597	-0.044397	0.003137	-0.060335	-0.015545	-0.126312	-0.02849	-0.073205	-0.026649	-0.064727	-0.073205
Pf3D7_01_v3	314368	319655	Pf3D7_01_v3	PF3D7_0107600	eukaryotic translation initiation factor 2-alpha kinase 2, putative	-0.019502	-0.023102	-0.058518	-0.014149	-0.062115	-0.122701	-0.070208	-0.062386	-0.045232	-0.101361	-0.040874	-0.045232
Pf3D7_01_v3	319918	321758	Pf3D7_01_v3	PF3D7_0107700	dolichyl-diphosphooligosaccharide--protein glycosyltransferase subunit OST3/OST6, putative	0.033307	0.034076	-0.008569	-0.047161	-0.03846	-0.014588	-0.067232	0.000153	-0.050535	-0.17703	-0.030692	-0.050535
Pf3D7_01_v3	322121	326234	Pf3D7_01_v3	PF3D7_0107800	double-strand break repair protein MRE11	0.01873	0.006838	0.001998	0.02045	-0.040203	-0.015077	-0.012001	-0.013846	-0.04	0.044524	0.006581	-0.04
Pf3D7_01_v3	326235	327474	Pf3D7_01_v3	PF3D7_0107900	conserved Plasmodium protein, unknown function	0.009229	-0.044282	-0.024451	0.002087	-0.036423	-0.026914	0.009826	-0.01975	-0.010286	-0.136029	0.028905	-0.010286
Pf3D7_01_v3	328181	329808	Pf3D7_01_v3	PF3D7_0108000	proteasome subunit beta type-3, putative	0.089588	-0.025399	0.049835	0.083095	0.035469	-0.017006	-0.006698	-0.062693	0.062002	-0.130257	-0.028004	0.062002
Pf3D7_01_v3	330488	332958	Pf3D7_01_v3	PF3D7_0108100	conserved protein, unknown function	0.03602	-0.029629	-0.06507	0.061342	0.050764	-0.046806	0.040156	0.03033	-0.079498	-0.126525	-0.047102	-0.079498
Pf3D7_01_v3	336918	344083	Pf3D7_01_v3	PF3D7_0108300	conserved Plasmodium protein, unknown function	0.165895	0.020032	-0.074122	0.034593	0.019507	-0.005836	0.165495	0.090534	-0.125546	-0.0199	-0.084108	-0.125546
Pf3D7_01_v3	344150	346790	Pf3D7_01_v3	PF3D7_0108400	mitochondrial carrier protein, putative	-0.042385	-0.020594	0.043546	0.000903	-0.006899	-0.020116	0.163484	0.027999	-0.086299	-0.041831	-0.023515	-0.086299
Pf3D7_01_v3	348920	349852	Pf3D7_01_v3	PF3D7_0108500	conserved Plasmodium protein, unknown function	-0.033791	-0.094462	-0.08998	-0.033291	0.007146	-0.108328	0.011654	-0.009763	-0.093022	-0.134933	-0.164175	-0.093022
Pf3D7_01_v3	349853	351876	Pf3D7_01_v3	PF3D7_0108600	conserved protein, unknown function	-0.020396	-0.026303	-0.017496	-0.022828	0.022506	-0.026389	0.051926	0.02155	-0.123344	-0.10209	-0.082235	-0.123344
Pf3D7_01_v3	352064	356461	Pf3D7_01_v3	PF3D7_0108700	secreted ookinete protein, putative	-0.014221	-0.023419	-0.063753	-0.029879	-0.02493	-0.015017	-0.013441	-0.013338	-0.044988	0.092326	-0.066488	-0.044988
Pf3D7_01_v3	357584	360589	Pf3D7_01_v3	PF3D7_0108800	mitochondrial carrier protein, putative	0.024341	-0.076434	-0.018012	-0.017649	-0.052238	-0.044721	-0.094626	0.097146	0.112654	-0.149994	0.11399	0.112654
Pf3D7_01_v3	363068	364242	Pf3D7_01_v3	PF3D7_0109000	photosensitized INA-labeled protein PHIL1	-0.000493	-0.017751	-0.017236	-0.051845	-0.008778	-0.032415	0.102404	0.047268	-0.08345	0.018055	-0.043973	-0.08345
Pf3D7_01_v3	365360	369045	Pf3D7_01_v3	PF3D7_0109100	LCCL domain-containing protein	-0.053016	-0.074943	-0.124194	-0.089514	-0.050113	-0.067687	-0.005472	0.000261	-0.092292	-0.101564	-0.07225	-0.092292
Pf3D7_01_v3	369230	370428	Pf3D7_01_v3	PF3D7_0109200	cleavage and polyadenylation specificity factor subunit 5, putative	-0.007591	0.015766	-0.006188	0.009324	0.031932	-0.028954	0.081963	0.074125	-0.014613	-0.035082	0.036566	-0.014613
Pf3D7_01_v3	371565	373262	Pf3D7_01_v3	PF3D7_0109300	fatty acid elongation protein, GNS1/SUR4 family, putative	-0.027687	-0.020142	-0.061079	0.035464	-0.031152	0.013152	0.013442	0.034743	-0.148484	-0.253135	-0.124887	-0.148484
Pf3D7_01_v3	374189	375337	Pf3D7_01_v3	PF3D7_0109400	tubulin-specific chaperone a, putative	-0.038514	-0.034837	-0.060137	-0.013242	-0.045585	-0.049209	-0.026112	-0.050206	-0.039584	0.001246	-0.065766	-0.039584
Pf3D7_01_v3	376044	377254	Pf3D7_01_v3	PF3D7_0109500	N-acetyltransferase, GNAT family, putative	-0.096697	-0.078278	-0.068564	-0.062412	-0.155425	-0.082188	-0.052995	-0.017072	-0.093588	-0.084893	-0.066817	-0.093588
Pf3D7_01_v3	380447	382674	Pf3D7_01_v3	PF3D7_0109800	phenylalanine--tRNA ligase alpha subunit	0.011408	-0.00862	-0.043984	0.035056	0.004014	-0.019707	0.054013	0.080028	0.019149	-0.049324	0.046848	0.019149
Pf3D7_01_v3	383034	388156	Pf3D7_01_v3	PF3D7_0109850	phosphatidate cytidylyltransferase, putative	-0.069441	-0.026599	-0.016504	-0.039437	0.066165	-0.006564	0.028592	-0.066101	-0.007744	0.172349	-0.044279	-0.007744
Pf3D7_01_v3	388157	389168	Pf3D7_01_v3	PF3D7_0110000	conserved Plasmodium protein, unknown function	0.02595	-0.00022	0.150899	-0.028559	-0.024149	0.106947	-0.069723	0.084885	0.011543	-0.136112	-0.093685	0.011543
Pf3D7_01_v3	389169	392315	Pf3D7_01_v3	PF3D7_0110100	selenocysteine-specific elongation factor, putative	-0.099212	0.012429	-0.148552	-0.024238	0.014651	-0.069925	0.03262	-0.000524	-0.023799	0.011378	-0.040909	-0.023799
Pf3D7_01_v3	392354	393125	Pf3D7_01_v3	PF3D7_0110200	FAD-linked sulfhydryl oxidase ERV1, putative	0.014403	0.039898	0.046894	0.050563	0.079999	0.003548	0.013123	0.07395	0.040632	-0.059808	0.020537	0.040632
Pf3D7_01_v3	393683	395085	Pf3D7_01_v3	PF3D7_0110400	DNA-directed RNA polymerase II subunit RPB9, putative	0.084501	0.055891	0.050732	0.051688	-0.003458	0.051722	0.095838	0.069582	0.107287	-0.079547	0.087629	0.107287
Pf3D7_01_v3	396341	403856	Pf3D7_01_v3	PF3D7_0110500	bromodomain protein, putative	0.024689	0.029712	0.050915	0.056403	0.052894	0.093982	0.029914	0.058999	0.080218	-0.004307	0.053091	0.080218
Pf3D7_01_v3	405489	412419	Pf3D7_01_v3	PF3D7_0110600	phosphatidylinositol-4-phosphate 5-kinase	-0.052235	-0.026677	-0.015617	0.058694	-0.004511	0.058411	0.024824	0.02026	0.041377	0.115515	0.057406	0.041377
Pf3D7_01_v3	413510	415350	Pf3D7_01_v3	PF3D7_0110700	chromatin assembly factor 1 protein WD40 domain, putative	0.020451	0.047694	-0.003415	0.021635	0.024744	0.01996	0.056676	0.00266	0.051842	0.066941	0.068813	0.051842
Pf3D7_01_v3	417671	419857	Pf3D7_01_v3	PF3D7_0110800	transcription initiation factor TFIIB, putative	-0.010564	0.043704	0.062804	0.040921	0.019946	0.045235	0.059857	0.039745	0.049203	0.083975	0.084084	0.049203
Pf3D7_01_v3	420043	421103	Pf3D7_01_v3	PF3D7_0110900	adenylate kinase-like protein 1	0.05596	0.003789	0.077618	0.026571	0.014908	0.020911	0.031214	0.041233	0.078469	0.078781	0.027376	0.078469
Pf3D7_01_v3	421526	427825	Pf3D7_01_v3	PF3D7_0111000	kinesin-8, putative	0.090908	0.06527	0.030888	0.083438	0.018869	0.055829	-0.00835	0.03884	0.04576	0.02058	0.075401	0.04576
Pf3D7_01_v3	431289	435292	Pf3D7_01_v3	PF3D7_0111300	P-loop containing nucleoside triphosphate hydrolase, putative	-0.083862	-0.02278	0.084553	-0.060719	0.020054	0.063944	0.121864	-0.001433	-0.073152	-0.227826	-0.062398	-0.073152
Pf3D7_01_v3	436158	438814	Pf3D7_01_v3	PF3D7_0111400	conserved Plasmodium protein, unknown function	-0.000694	0.02479	-0.054838	-0.020432	-0.012158	-0.024263	-0.006757	-0.008334	-0.005969	0.012463	-0.017359	-0.005969
Pf3D7_01_v3	439402	441668	Pf3D7_01_v3	PF3D7_0111500	UMP-CMP kinase, putative	-0.022765	-0.05096	-0.106486	-0.031059	-0.033439	-0.066474	-0.03366	-0.100225	-0.074593	-0.036164	-0.033052	-0.074593
Pf3D7_01_v3	445776	449099	Pf3D7_01_v3	PF3D7_0111800	eukaryotic translation initiation factor 4E, putative	0.018352	0.009866	-0.012519	0.053006	0.03797	0.015745	0.029804	0.008327	-0.032949	-0.032288	-0.048119	-0.032949
Pf3D7_01_v3	450739	453368	Pf3D7_01_v3	PF3D7_0112000	TatD-like deoxyribonuclease	-0.004773	-0.027131	-0.044937	0.0511	0.043461	0.024558	0.027009	0.063617	0.04833	0.077421	-0.010156	0.04833
Pf3D7_01_v3	464476	470444	Pf3D7_01_v3	PF3D7_0112200	multidrug resistance-associated protein 1	0.007443	0.036085	0.014165	0.060371	-0.001837	0.005373	-0.020066	-0.013099	-0.032619	-0.007352	-0.028247	-0.032619
Pf3D7_01_v3	473489	475887	Pf3D7_01_v3	PF3D7_0112300	18S ribosomal RNA	-0.010686	0.045048	3.5e-05	0.07141	0.020814	0.043375	0.043704	0.020307	-0.03516	0.119409	-0.040371	-0.03516
Pf3D7_01_v3	476403	477278	Pf3D7_01_v3	PF3D7_0112500	5.8S ribosomal RNA	-0.040389	-0.039958	-0.02297	0.008813	-0.040097	-0.035113	0.012819	-0.080619	-0.040849	-0.00312	-0.009438	-0.040849
Pf3D7_01_v3	477279	481595	Pf3D7_01_v3	PF3D7_0112700	28S ribosomal RNA	-0.085693	0.006483	0.115762	0.010467	-0.023371	0.090838	0.011278	-0.016468	0.125305	0.233084	0.192462	0.125305
Pf3D7_01_v3	481596	482868	Pf3D7_01_v3	PF3D7_0112800	Plasmodium exported protein (hyp11), unknown function	0.006159	0.010039	0.016932	0.043906	-0.043798	-0.022939	-0.030877	-0.055076	0.13777	0.170697	0.0794	0.13777
Pf3D7_01_v3	486250	487436	Pf3D7_01_v3	PF3D7_0112900	Plasmodium exported protein, unknown function	0.005795	0.062313	0.198685	0.118601	0.094879	0.159789	0.056627	0.018699	0.156244	0.141412	0.198184	0.156244
Pf3D7_01_v3	487642	490377	Pf3D7_01_v3	PF3D7_0113000	glutamic acid-rich protein GARP	-0.109914	-0.014163	-0.057801	-0.047296	-0.023928	-0.12512	-0.084704	-0.021553	0.067191	0.071858	0.04337	0.067191
Pf3D7_01_v3	494994	500326	Pf3D7_01_v3	PF3D7_0113100	surface-associated interspersed protein 1.1 (SURFIN 1.1)	-0.076488	-0.136909	-0.115029	-0.029126	-0.110735	-0.122444	-0.112269	-0.097433	-0.105636	0.047917	0.005841	-0.105636
Pf3D7_01_v3	500709	503118	Pf3D7_01_v3	PF3D7_0113200	Plasmodium exported protein, unknown function	0.108033	0.051063	0.098917	0.078595	0.057944	0.018999	0.054446	0.083965	0.108935	0.211572	0.144414	0.108935
Pf3D7_01_v3	504688	507124	Pf3D7_01_v3	PF3D7_0113300	Plasmodium exported protein (hyp1), unknown function	-0.046832	0.011961	0.03472	-0.016137	-0.04852	-0.021547	0.015586	0.009682	0.014395	0.102839	0.038834	0.014395
Pf3D7_01_v3	508002	509998	Pf3D7_01_v3	PF3D7_0113400	Plasmodium exported protein, unknown function	-0.056434	-0.084423	-0.027777	-0.092604	-0.056462	-0.029918	-0.011957	-0.040829	-0.053128	0.006408	-0.04034	-0.053128
Pf3D7_01_v3	511836	518105	Pf3D7_01_v3	PF3D7_0113600	surface-associated interspersed protein 1.2 (SURFIN 1.2), pseudogene	-0.040955	-0.037956	-0.06724	-0.039131	-0.004215	-0.056817	0.018037	0.064024	-0.041918	-0.021158	0.042228	-0.041918
Pf3D7_01_v3	520557	522829	Pf3D7_01_v3	PF3D7_0113700	heat shock protein 40, type II	-0.050557	-0.063539	0.017443	-0.009103	0.000748	-0.034966	0.060261	0.053985	0.048065	0.091819	0.061246	0.048065
Pf3D7_01_v3	526857	536601	Pf3D7_01_v3	PF3D7_0113800	DBL containing protein, unknown function	0.001995	0.042095	0.12382	0.02402	0.007163	0.042369	0.037807	0.0618	0.132248	0.097811	0.115653	0.132248
Pf3D7_01_v3	536859	538275	Pf3D7_01_v3	PF3D7_0113900	CX3CL1-binding protein 1	-0.054107	-0.018836	0.089822	-0.018839	-0.029399	0.005043	0.09798	0.017845	0.02085	0.099097	0.047265	0.02085
Pf3D7_01_v3	542230	547233	Pf3D7_01_v3	PF3D7_0114000	exported protein family 1	-0.039111	-0.010092	0.032062	-0.080158	-0.03554	-0.027042	0.007198	-0.004143	0.001647	0.041443	-0.000858	0.001647
Pf3D7_01_v3	550326	551963	Pf3D7_01_v3	PF3D7_0114200	exported protein family 3	-0.043944	-0.095749	0.07499	-0.111743	-0.088505	-0.034427	0.070535	-0.107545	0.028346	0.014811	0.049559	0.028346
Pf3D7_01_v3	552390	553927	Pf3D7_01_v3	PF3D7_0114300	exported protein family 4, pseudogene	0.007025	0.09324	0.188888	0.045047	0.079952	0.09235	0.141408	0.12623	0.207836	0.125733	0.19571	0.207836
Pf3D7_01_v3	553928	555689	Pf3D7_01_v3	PF3D7_0114400	erythrocyte membrane protein 1 (PfEMP1), exon 2, pseudogene	-0.058801	-0.133843	-0.088448	-0.029368	-0.068262	-0.093898	-0.051948	-0.082645	-0.023001	0.004583	-0.062417	-0.023001
Pf3D7_01_v3	560224	561784	Pf3D7_01_v3	PF3D7_0114600	stevor, pseudogene	-0.076978	-0.026085	-0.059765	-0.097364	-0.086758	-0.113618	0.038552	-0.166758	-0.043087	0.103898	-0.067256	-0.043087
Pf3D7_01_v3	563453	565092	Pf3D7_01_v3	PF3D7_0114700	rifin	-0.03448	-0.13778	-0.006836	-0.138958	-0.076681	-0.115245	0.071065	-0.125666	-0.00859	0.028835	-0.023199	-0.00859
Pf3D7_01_v3	569235	570522	Pf3D7_01_v3	PF3D7_0114800	Plasmodium exported protein (hyp7), unknown function	0.062357	-0.040009	-0.01084	-0.147326	-0.039278	-0.087676	-0.025637	-0.082765	-0.002683	-0.008364	-0.118233	-0.002683
Pf3D7_01_v3	571885	573103	Pf3D7_01_v3	PF3D7_0114900	Plasmodium exported protein, unknown function, pseudogene	0.08304	0.042604	0.064	0.009899	0.065688	0.051818	0.034583	0.032514	0.225249	0.099757	0.178875	0.225249
Pf3D7_01_v3	577454	584039	Pf3D7_01_v3	PF3D7_0115000	surface-associated interspersed protein 1.3 (SURFIN 1.3)	-0.043302	-0.097034	-0.046499	-0.195801	-0.028168	-0.087269	-0.081476	-0.154948	-0.083315	-0.07936	-0.103337	-0.083315
Pf3D7_01_v3	591599	593437	Pf3D7_01_v3	PF3D7_0115200	rifin	0.057348	0.012863	-0.101426	-0.179499	-0.030247	-0.049884	0.097382	-0.011685	0.045927	0.236384	-0.010033	0.045927
Pf3D7_01_v3	594852	596523	Pf3D7_01_v3	PF3D7_0115300	rifin	-0.073728	-0.074701	0.05157	-0.058234	-0.018661	-0.077825	0.062047	-0.04778	0.127946	0.196925	0.026057	0.127946
Pf3D7_01_v3	598215	599722	Pf3D7_01_v3	PF3D7_0115400	stevor	-0.039925	-0.084698	0.195137	-0.060186	0.004494	-0.049956	-0.064254	-0.063721	0.121021	0.008137	0.067004	0.121021
Pf3D7_01_v3	603912	605781	Pf3D7_01_v3	PF3D7_0115600	rifin	-0.004746	-0.179488	0.092172	-0.064774	-0.010573	-0.097624	-0.057362	-0.125483	0.05269	-0.094838	-0.001711	0.05269
Pf3D7_01_v3	607140	615143	Pf3D7_01_v3	PF3D7_0115700	erythrocyte membrane protein 1, PfEMP1	-0.061599	-0.242856	-0.027689	-0.176117	-0.08638	-0.181967	-0.16622	-0.139086	-0.062087	-0.062861	-0.056882	-0.062087
Pf3D7_02_v3	24982	31418	Pf3D7_02_v3	PF3D7_0200100	erythrocyte membrane protein 1, PfEMP1	-0.068602	-0.123627	0.086623	-0.297425	-0.104678	-0.196303	-0.131374	-0.123445	-0.046964	0.1014	-0.03167	-0.046964
Pf3D7_02_v3	32780	34509	Pf3D7_02_v3	PF3D7_0200200	rifin	0.036457	-0.145934	0.181084	-0.026142	-0.041167	-0.037602	-0.069055	-0.069411	0.158956	0.092809	0.128013	0.158956
Pf3D7_02_v3	38037	39553	Pf3D7_02_v3	PF3D7_0200400	stevor	0.030758	-0.035629	0.087439	-0.047387	-0.075182	-0.075542	-0.101583	-0.021337	0.187893	0.11488	0.153245	0.187893
Pf3D7_02_v3	41265	43108	Pf3D7_02_v3	PF3D7_0200500	rifin	0.210405	-0.064445	-0.187097	0.04576	0.054387	0.063371	-0.092932	0.064045	-0.060434	-0.150552	0.076204	-0.060434
Pf3D7_02_v3	45036	46808	Pf3D7_02_v3	PF3D7_0200600	rifin	0.151144	-0.018674	-0.158925	0.13041	0.007157	0.043405	-0.129753	0.055463	0.020532	-0.163032	0.118657	0.020532
Pf3D7_02_v3	48673	50397	Pf3D7_02_v3	PF3D7_0200700	rifin	0.273716	0.05576	-0.105595	0.147531	0.052025	0.05908	-0.066569	0.126239	0.135844	-0.036235	0.170136	0.135844
Pf3D7_02_v3	54004	55505	Pf3D7_02_v3	PF3D7_0200900	stevor, pseudogene	0.175892	-0.175203	0.00571	0.055427	0.108455	0.002585	-0.016815	-0.062792	0.136066	-0.170564	0.087927	0.136066
Pf3D7_02_v3	57094	58671	Pf3D7_02_v3	PF3D7_0201000	rifin	0.153027	-0.112635	-0.252916	0.038223	-0.072298	-0.128892	-0.148186	-0.083252	-0.074635	-0.295648	-0.079376	-0.074635
Pf3D7_02_v3	66279	67795	Pf3D7_02_v3	PF3D7_0201300	stevor	0.008342	-0.146933	-0.222929	-0.07709	-0.111567	-0.16678	-0.131451	-0.084563	-0.079952	-0.26394	-0.057651	-0.079952
Pf3D7_02_v3	109314	110830	Pf3D7_02_v3	PF3D7_0202100	liver stage associated protein 2	0.139548	-0.058835	-0.246764	0.004982	-0.086076	-0.179489	-0.081347	0.014693	-0.153895	-0.510336	-0.109958	-0.153895
Pf3D7_02_v3	112297	113932	Pf3D7_02_v3	PF3D7_0202200	EMP1-trafficking protein	0.040925	-0.250331	-0.254678	-0.056261	-0.075276	-0.153383	-0.166214	-0.104923	-0.123256	-0.454314	-0.192139	-0.123256
Pf3D7_02_v3	116975	118485	Pf3D7_02_v3	PF3D7_0202300	Plasmodium exported protein (hyp11), unknown function	0.09903	-0.118183	-0.16924	-0.037992	-0.027068	-0.102661	-0.073049	-0.070958	-0.076063	-0.213384	-0.065896	-0.076063
Pf3D7_02_v3	120274	124352	Pf3D7_02_v3	PF3D7_0202400	translation-enhancing factor	0.047011	-0.129446	-0.153015	-0.075856	-0.0174	-0.096108	-0.045316	-0.090117	-0.085971	-0.204627	-0.10137	-0.085971
Pf3D7_02_v3	127744	128564	Pf3D7_02_v3	PF3D7_0202500	early transcribed membrane protein 2	0.015255	-0.139795	-0.182554	-0.10847	-0.096425	-0.08962	0.016321	-0.097749	-0.10166	-0.247804	-0.107676	-0.10166
Pf3D7_02_v3	129092	133813	Pf3D7_02_v3	PF3D7_0202600	nucleic acid binding protein, putative	0.058316	0.100985	-0.040968	-0.004416	0.057676	0.028933	0.126525	0.03357	0.070206	-0.002072	0.034234	0.070206
Pf3D7_02_v3	135273	137348	Pf3D7_02_v3	PF3D7_0202700	octaprenyl pyrophosphate synthase	0.270003	0.145238	0.017589	0.031631	0.077346	0.061314	0.007942	0.039375	0.099814	-0.000438	0.089037	0.099814
Pf3D7_02_v3	137349	138639	Pf3D7_02_v3	PF3D7_0202800	conserved Plasmodium protein, unknown function	0.033718	-0.145542	-0.080275	-0.001491	-0.031327	-0.078548	0.042094	-0.00879	-0.008331	-0.133844	-0.04545	-0.008331
Pf3D7_02_v3	138677	141408	Pf3D7_02_v3	PF3D7_0202900	palmitoyltransferase DHHC12, putative	0.027925	-0.047597	-0.045468	-0.02774	0.031327	-0.012342	-0.005226	-0.012384	0.022053	-0.147225	-0.00806	0.022053
Pf3D7_02_v3	141409	147814	Pf3D7_02_v3	PF3D7_0203000	repetitive organellar protein, putative	0.132902	0.065316	0.000303	0.036727	0.033871	0.019376	0.098438	0.055631	0.110636	0.041604	0.047131	0.110636
Pf3D7_02_v3	149274	157231	Pf3D7_02_v3	PF3D7_0203100	protein kinase, putative	-0.014563	-0.153983	-0.09448	-0.108547	5.1e-05	-0.103195	0.021508	-0.081985	-0.074074	-0.016864	-0.081993	-0.074074
Pf3D7_02_v3	157887	159910	Pf3D7_02_v3	PF3D7_0203200	conserved Plasmodium protein, unknown function	0.043382	-0.032153	-0.065423	-0.001892	0.001794	-0.05847	0.008661	-0.045806	-0.066402	-0.125121	-0.046444	-0.066402
Pf3D7_02_v3	160264	161492	Pf3D7_02_v3	PF3D7_0203300	ERCC1 nucleotide excision repair protein, putative	0.035003	0.016577	0.050452	0.024199	0.055543	0.003883	0.03602	0.009858	0.040579	0.06511	0.054417	0.040579
Pf3D7_02_v3	161815	163150	Pf3D7_02_v3	PF3D7_0203400	conserved Plasmodium protein, unknown function	0.157405	0.129373	0.042844	0.10774	0.106876	0.030298	0.139889	0.097455	0.093455	0.15833	0.10208	0.093455
Pf3D7_02_v3	165894	168301	Pf3D7_02_v3	PF3D7_0203600	conserved Plasmodium protein, unknown function	0.117638	0.009595	-0.019888	0.044283	0.005062	-0.067401	0.066431	0.02531	-0.053928	-0.059463	-0.06244	-0.053928
Pf3D7_02_v3	168432	170386	Pf3D7_02_v3	PF3D7_0203700	protein MAK16, putative	-0.110642	-0.099495	-0.047948	-0.073886	-0.062302	-0.091721	-0.150452	-0.096007	-0.083095	-0.167039	-0.070833	-0.083095
Pf3D7_02_v3	171313	175162	Pf3D7_02_v3	PF3D7_0203800	conserved Plasmodium protein, unknown function	0.035279	0.021956	0.115754	0.026397	0.058304	0.064472	0.087143	-0.001285	0.144387	-0.009203	0.036282	0.144387
Pf3D7_02_v3	176317	178550	Pf3D7_02_v3	PF3D7_0203900	5'-3' exonuclease, N-terminal resolvase-like domain, putative	-0.043496	-0.010149	0.005595	-0.031775	0.012006	0.010073	0.052567	-0.014202	0.034841	0.031809	0.025473	0.034841
Pf3D7_02_v3	178705	181776	Pf3D7_02_v3	PF3D7_0204000	condensin-2 complex subunit H2, putative	-0.057979	-0.01698	0.020899	-0.01494	0.051447	-0.060955	-0.029889	-0.015364	-0.004949	-0.006498	0.034738	-0.004949
Pf3D7_02_v3	181978	189365	Pf3D7_02_v3	PF3D7_0204100	Sel1 repeat-containing protein, putative	-0.038863	0.003036	0.047772	0.003921	0.035419	-0.002394	0.085472	0.005655	-0.061318	-0.016357	-0.016694	-0.061318
Pf3D7_02_v3	192568	194449	Pf3D7_02_v3	PF3D7_0204200	conserved Plasmodium protein, unknown function	0.026319	0.020456	0.059824	-0.053665	0.010739	-0.027827	0.051635	0.006735	-0.024373	-0.003277	0.029538	-0.024373
Pf3D7_02_v3	194576	197067	Pf3D7_02_v3	PF3D7_0204300	conserved Plasmodium protein, unknown function	0.070097	0.062124	-0.054569	0.081972	0.0388	-0.034035	0.010024	0.070927	-0.007283	-0.107531	-0.022512	-0.007283
Pf3D7_02_v3	197068	198198	Pf3D7_02_v3	PF3D7_0204400	dynein light chain, putative	0.060832	0.00538	0.047311	-0.006086	0.02422	-0.012135	0.056756	0.062822	-0.004933	-0.019692	0.027507	-0.004933
Pf3D7_02_v3	198199	199820	Pf3D7_02_v3	PF3D7_0204500	aspartate transaminase	0.022837	-0.030994	0.043659	0.030888	0.088395	0.030793	-0.030642	0.011741	-0.045531	-0.005191	-0.087719	-0.045531
Pf3D7_02_v3	200232	204298	Pf3D7_02_v3	PF3D7_0204600	5'-3' exonuclease, putative	0.056011	0.019879	0.062274	0.034226	0.089517	0.07376	0.126246	0.05134	0.06285	0.055665	0.030039	0.06285
Pf3D7_02_v3	205639	207653	Pf3D7_02_v3	PF3D7_0204700	hexose transporter	-0.01393	0.007347	-0.043732	0.029229	-0.001551	-0.046808	0.100802	0.049931	-0.051275	0.017665	-0.036293	-0.051275
Pf3D7_02_v3	209333	211083	Pf3D7_02_v3	PF3D7_0204800	3'-5' exonuclease, putative	0.015903	-0.015007	-0.024107	0.04165	0.01067	0.046832	-0.026674	-0.022607	-0.037577	-0.098723	0.006537	-0.037577
Pf3D7_02_v3	211098	212804	Pf3D7_02_v3	PF3D7_0204900	2-methoxy-6-polyprenyl-1,4-benzoquinol methylase, mitochondrial, putative	-0.091643	-0.070584	-0.063562	-0.062599	-0.044912	-0.051356	0.07139	-0.067484	0.006617	-0.012588	-0.021622	0.006617
Pf3D7_02_v3	212805	214673	Pf3D7_02_v3	PF3D7_0205000	conserved Plasmodium protein, unknown function	-0.133838	0.117236	0.094748	-0.030791	0.007084	0.029489	0.060774	0.006755	-0.07062	0.0244	-0.01715	-0.07062
Pf3D7_02_v3	214674	217598	Pf3D7_02_v3	PF3D7_0205100	conserved Plasmodium protein, unknown function	0.193833	0.303062	0.26643	0.217648	0.227666	0.156321	0.250347	0.223644	0.232277	0.298949	0.222158	0.232277
Pf3D7_02_v3	217632	219157	Pf3D7_02_v3	PF3D7_0205200	MORN repeat protein, putative	-0.103563	-0.02307	0.021479	-0.028735	-0.037438	-0.011121	-0.047644	-0.062858	-0.004028	-0.010383	-0.042543	-0.004028
Pf3D7_02_v3	219440	222506	Pf3D7_02_v3	PF3D7_0205300	conserved Plasmodium protein, unknown function	0.008998	-0.036011	0.020017	0.042318	0.019875	0.018388	0.022031	0.011012	0.035004	0.055732	0.030509	0.035004
Pf3D7_02_v3	223228	225101	Pf3D7_02_v3	PF3D7_0205400	PCI domain-containing protein, putative	-0.039827	-0.04138	-0.040417	-0.012808	-0.011611	-0.03645	-0.001387	-0.026757	0.004267	-0.054072	0.003071	0.004267
Pf3D7_02_v3	225312	226495	Pf3D7_02_v3	PF3D7_0205500	DNA-directed RNA polymerase II 16 kDa subunit, putative	-0.01497	-0.000112	0.053902	0.025331	0.024249	-0.012039	0.00994	0.01127	0.015249	0.002669	-0.038715	0.015249
Pf3D7_02_v3	227775	230182	Pf3D7_02_v3	PF3D7_0205600	conserved Plasmodium protein, unknown function	0.04442	0.017619	0.056248	0.056755	0.009755	0.042598	0.038887	0.038744	0.035788	0.023284	0.049122	0.035788
Pf3D7_02_v3	230891	232629	Pf3D7_02_v3	PF3D7_0205700	RNA-binding protein, putative	-0.035686	-0.025646	-0.065199	-0.028866	-0.025611	0.01765	0.046741	0.034221	-0.045855	-0.033085	-0.006251	-0.045855
Pf3D7_02_v3	232630	233726	Pf3D7_02_v3	PF3D7_0205800	PH domain-containing protein, putative	-0.031689	0.012825	-0.002121	0.028146	-0.00952	0.028612	0.068389	0.027748	0.080544	0.140812	0.089087	0.080544
Pf3D7_02_v3	234987	239031	Pf3D7_02_v3	PF3D7_0205900	26S proteasome regulatory subunit RPN1, putative	0.102974	0.138736	0.246031	0.158412	0.195762	0.170515	0.152475	0.224107	0.252199	0.135673	0.283045	0.252199
Pf3D7_02_v3	239032	244046	Pf3D7_02_v3	PF3D7_0206000	DNA repair protein RAD2, putative	0.03171	0.015813	-0.069072	0.019863	0.01741	0.062675	-0.003951	0.060223	0.106409	0.051522	0.108098	0.106409
Pf3D7_02_v3	245108	246949	Pf3D7_02_v3	PF3D7_0206100	cysteine desulfuration protein SufE	0.013912	0.040657	0.044914	-0.011835	-0.058492	0.02796	-0.023743	0.110071	0.087432	0.065535	0.050627	0.087432
Pf3D7_02_v3	248780	250977	Pf3D7_02_v3	PF3D7_0206200	pantothenate transporter	0.029362	-0.039117	-0.018482	-0.009187	-0.005003	0.00875	0.002307	-0.008055	0.016205	0.037763	0.067182	0.016205
Pf3D7_02_v3	252144	262693	Pf3D7_02_v3	PF3D7_0206300	pentafunctional AROM polypeptide, putative, pseudogene	-0.097225	-0.060707	-0.029742	-0.016639	-0.109439	-0.07792	-0.044714	-0.080092	-0.10625	0.020142	-0.027154	-0.10625
Pf3D7_02_v3	262787	267597	Pf3D7_02_v3	PF3D7_0206500	conserved Plasmodium protein, unknown function	0.034291	0.061866	0.079296	0.068568	0.022433	0.064366	0.018809	0.056581	0.08924	0.036285	0.129088	0.08924
Pf3D7_02_v3	271344	273259	Pf3D7_02_v3	PF3D7_0206700	adenylosuccinate lyase	0.01613	0.024582	0.078634	0.045429	-0.01614	0.076956	0.050145	0.052884	0.06333	0.097221	0.066481	0.06333
Pf3D7_02_v3	273439	274757	Pf3D7_02_v3	PF3D7_0206800	merozoite surface protein 2	-0.0013	-0.007132	0.038605	-0.000314	-0.042259	0.028214	-0.010491	-0.016633	0.054533	0.031874	0.055496	0.054533
Pf3D7_02_v3	275290	276827	Pf3D7_02_v3	PF3D7_0206900	merozoite surface protein 5	0.04805	0.02629	0.090101	0.085029	0.015385	0.010769	-0.000948	0.046882	0.138706	0.064521	0.12029	0.138706
Pf3D7_02_v3	277244	278706	Pf3D7_02_v3	PF3D7_0207000	merozoite surface protein 4	-0.014713	-0.014469	0.028242	-0.016915	-0.024016	0.000934	0.019967	-0.010231	0.009184	0.053999	0.033945	0.009184
Pf3D7_02_v3	281657	287595	Pf3D7_02_v3	PF3D7_0207100	conserved Plasmodium protein, unknown function	0.023817	0.024797	0.10045	0.025009	0.004318	0.054033	0.035364	0.069635	0.103724	0.146248	0.04703	0.103724
Pf3D7_02_v3	289918	292953	Pf3D7_02_v3	PF3D7_0207300	serine repeat antigen 8	-0.003456	-0.015888	0.078372	0.031251	-0.011669	-0.002576	0.051911	0.004675	0.063514	0.070158	0.03739	0.063514
Pf3D7_02_v3	294023	297866	Pf3D7_02_v3	PF3D7_0207400	serine repeat antigen 7	0.062668	0.011885	0.063036	0.025512	0.033513	0.026465	0.033856	0.023236	0.073943	0.127464	0.071291	0.073943
Pf3D7_02_v3	298647	302814	Pf3D7_02_v3	PF3D7_0207500	serine repeat antigen 6	0.125159	-0.021376	0.025868	0.03363	0.095352	0.031784	-0.023095	0.014743	0.02718	-0.019067	0.018141	0.02718
Pf3D7_02_v3	303343	307277	Pf3D7_02_v3	PF3D7_0207600	serine repeat antigen 5	-0.014872	-0.0106	0.05002	-0.037195	-0.005522	0.015683	0.017189	-0.017202	0.015093	0.015351	0.046729	0.015093
Pf3D7_02_v3	308597	312405	Pf3D7_02_v3	PF3D7_0207700	serine repeat antigen 4	0.002166	-0.079018	0.006632	-0.005008	-0.020048	-0.074017	0.013167	-0.015492	-0.019732	-0.067226	-0.017322	-0.019732
Pf3D7_02_v3	313199	316991	Pf3D7_02_v3	PF3D7_0207800	serine repeat antigen 3	-0.04617	-0.069979	0.012508	-0.124596	-0.138626	-0.112911	-0.100939	-0.151302	-0.117339	-0.052977	-0.085289	-0.117339
Pf3D7_02_v3	317346	321560	Pf3D7_02_v3	PF3D7_0207900	serine repeat antigen 2	0.032658	0.003561	-0.027117	0.007335	-0.054715	-0.030831	-0.007902	0.012332	-0.000735	0.029329	-0.057714	-0.000735
Pf3D7_02_v3	322088	325973	Pf3D7_02_v3	PF3D7_0208000	serine repeat antigen 1	0.100868	0.127634	0.156318	0.095289	0.093709	0.042027	0.092106	0.096243	0.205395	0.203054	0.120778	0.205395
Pf3D7_02_v3	327682	335441	Pf3D7_02_v3	PF3D7_0208100	conserved Plasmodium protein, unknown function	0.058246	0.006212	0.119573	0.034468	0.076729	-0.072813	0.129529	0.06192	0.062499	-0.067442	0.052258	0.062499
Pf3D7_02_v3	335442	336831	Pf3D7_02_v3	PF3D7_0208200	KRR1 small subunit processome component, putative	-0.033669	-0.029985	0.024277	-0.017887	-0.017962	-0.017596	-0.0069	-0.054016	0.079577	0.123747	0.037126	0.079577
Pf3D7_02_v3	337308	343137	Pf3D7_02_v3	PF3D7_0208300	conserved Plasmodium protein, unknown function	-0.051483	-0.016226	0.008293	0.001331	-0.033697	-0.045357	-0.011227	0.005435	0.047427	0.063365	0.038956	0.047427
Pf3D7_02_v3	343138	349590	Pf3D7_02_v3	PF3D7_0208400	conserved Plasmodium protein, unknown function	-0.015605	0.05216	0.065328	-0.003963	-0.019756	0.009537	0.02824	0.031724	0.094451	0.224382	0.066876	0.094451
Pf3D7_02_v3	352586	353878	Pf3D7_02_v3	PF3D7_0208500	acyl carrier protein	-0.111935	0.010232	0.038987	-0.056114	-0.031943	0.009504	0.182298	-0.000745	0.017381	0.031658	-0.011406	0.017381
Pf3D7_02_v3	354371	356309	Pf3D7_02_v3	PF3D7_0208600	ribosome-recycling factor	-0.055851	-0.124629	-0.0377	-0.144861	-0.099744	-0.033698	0.002996	-0.135337	-0.035426	-0.138245	-0.025144	-0.035426
Pf3D7_02_v3	356310	358264	Pf3D7_02_v3	PF3D7_0208700	conserved Plasmodium protein, unknown function, unspecified product	-0.016237	-0.03204	-0.008582	-0.056913	-0.047653	-0.061056	0.012505	-0.040456	-0.082856	-0.01262	-0.055103	-0.082856
Pf3D7_02_v3	358892	360099	Pf3D7_02_v3	PF3D7_0208800	conserved Plasmodium protein, unknown function	0.027158	0.039874	-0.029926	0.041203	0.039425	0.027812	0.067264	0.013344	0.00087	-0.00672	-0.031056	0.00087
Pf3D7_02_v3	360578	368604	Pf3D7_02_v3	PF3D7_0208900	6-cysteine protein P230p	-0.003452	0.01868	0.017808	-0.011995	-0.019816	0.005703	-0.029916	-0.003245	0.018794	0.081783	0.016244	0.018794
Pf3D7_02_v3	370188	380095	Pf3D7_02_v3	PF3D7_0209000	6-cysteine protein P230	-0.003309	-0.075163	-0.030835	-0.026477	-0.086536	-0.0519	-0.057056	-0.066168	0.03902	0.116557	0.015929	0.03902
Pf3D7_02_v3	380880	383695	Pf3D7_02_v3	PF3D7_0209100	patatin-like phospholipase, putative	0.020567	0.005107	-0.062206	-0.001941	-0.006846	-0.043677	-0.065445	0.002494	-0.004446	0.094895	0.025726	-0.004446
Pf3D7_02_v3	384615	386830	Pf3D7_02_v3	PF3D7_0209200	exosome complex component MTR3, putative	-0.079446	-0.03527	-0.107966	-0.030335	-0.060495	-0.150275	-0.061104	-0.042676	0.031061	-0.009793	0.017671	0.031061
Pf3D7_02_v3	387023	388287	Pf3D7_02_v3	PF3D7_0209300	2C-methyl-D-erythritol 2,4-cyclodiphosphate synthase	0.005955	0.017935	-0.003407	-0.011126	-0.015223	0.035352	-0.002225	-0.001471	-0.014404	-0.025287	-0.025947	-0.014404
Pf3D7_02_v3	388288	390861	Pf3D7_02_v3	PF3D7_0209400	conserved protein, unknown function	-0.024417	-0.094525	-0.084831	-0.064336	-0.033081	-0.063216	-0.057975	-0.056152	-0.048189	0.008916	-0.020633	-0.048189
Pf3D7_02_v3	391025	393039	Pf3D7_02_v3	PF3D7_0209500	conserved Plasmodium protein, unknown function	-0.00282	0.040764	-0.106529	0.004721	-0.079445	-0.027124	0.064613	-0.016526	-0.120871	-0.013879	-0.062344	-0.120871
Pf3D7_02_v3	393987	398995	Pf3D7_02_v3	PF3D7_0209600	transporter, putative	-0.01168	-0.015996	-0.07729	0.007977	-0.015172	0.028383	0.041303	0.024037	0.000782	-0.113022	-0.043356	0.000782
Pf3D7_02_v3	399903	402109	Pf3D7_02_v3	PF3D7_0209700	RING zinc finger protein, putative	0.022994	-0.023761	-0.067029	0.017923	-0.035847	-0.063562	0.010007	-0.048643	-0.12574	-0.187868	-0.068375	-0.12574
Pf3D7_02_v3	404031	406605	Pf3D7_02_v3	PF3D7_0209800	ATP-dependent RNA helicase UAP56	-0.087197	-0.047483	-0.117722	-0.008289	-0.127201	-0.055515	-0.024291	-0.076271	-0.164721	-0.262444	-0.194354	-0.164721
Pf3D7_02_v3	409733	410478	Pf3D7_02_v3	PF3D7_0210000	secretory complex protein 61 gamma subunit	-0.117746	-0.016853	-0.168625	-0.082295	-0.146898	0.056103	0.055048	-0.068312	-0.075909	0.071978	-0.0997	-0.075909
Pf3D7_02_v3	413069	421387	Pf3D7_02_v3	PF3D7_0210200	conserved Plasmodium protein, unknown function	0.014379	0.011251	0.06889	0.13009	-0.02934	0.086853	0.095202	-0.000771	0.093615	0.215575	0.108236	0.093615
Pf3D7_02_v3	422813	424904	Pf3D7_02_v3	PF3D7_0210300	monocarboxylate transporter, putative	-0.105889	0.06664	0.032897	-0.081919	-0.081558	0.012567	-0.017717	-0.131282	-0.071222	-0.049929	-0.076596	-0.071222
Pf3D7_02_v3	425439	426747	Pf3D7_02_v3	PF3D7_0210400	50S ribosomal protein L33, putative	-0.007619	-0.033651	-0.023172	0.053885	-0.008279	0.016854	0.012999	-0.022074	-0.049018	-0.141989	-0.051258	-0.049018
Pf3D7_02_v3	427240	431780	Pf3D7_02_v3	PF3D7_0210500	conserved Plasmodium protein, unknown function	-0.059833	0.032701	-0.004589	0.064526	-0.130491	-0.021835	-0.043647	-0.02289	-0.004211	-0.119539	0.002907	-0.004211
Pf3D7_02_v3	431791	434336	Pf3D7_02_v3	PF3D7_0210600	conserved protein, unknown function	0.069181	0.091511	0.048204	0.093372	0.031052	0.002367	0.069267	0.100718	0.04817	0.149685	0.002361	0.04817
Pf3D7_02_v3	435800	437244	Pf3D7_02_v3	PF3D7_0210700	syntaxin, Qa-SNARE family	-0.036755	0.039286	0.035535	0.01424	-0.013453	0.048353	-0.017382	-0.012798	-0.063	0.041522	0.003143	-0.063
Pf3D7_02_v3	437505	439252	Pf3D7_02_v3	PF3D7_0210800	conserved Plasmodium protein, unknown function	0.008527	-0.000283	0.032821	0.042855	-0.028188	0.023618	-0.001921	-0.039854	0.031863	0.008659	0.005236	0.031863
Pf3D7_02_v3	441830	443184	Pf3D7_02_v3	PF3D7_0210900	conserved Plasmodium protein, unknown function	-0.015721	0.076868	-0.066144	0.120589	0.069442	0.03619	-0.014336	0.069605	-0.084452	-0.102544	-0.012737	-0.084452
Pf3D7_02_v3	443574	444858	Pf3D7_02_v3	PF3D7_0211000	unspecified product	0.006417	-0.015143	-0.006817	0.003557	0.003344	0.015688	0.027415	0.016772	-0.018592	-0.0464	-0.022518	-0.018592
Pf3D7_02_v3	451501	455347	Pf3D7_02_v3	PF3D7_0211100	conserved Plasmodium protein, unknown function	-0.012244	0.049745	0.026237	0.000908	0.016316	0.059119	0.053378	0.043719	0.060205	0.165201	0.034616	0.060205
Pf3D7_02_v3	455348	456536	Pf3D7_02_v3	PF3D7_0211200	ras-related protein Rab-5A	0.035641	0.034932	0.037521	0.029367	0.028619	0.073202	0.089658	-0.030464	0.032471	0.048004	-0.022259	0.032471
Pf3D7_02_v3	456880	458828	Pf3D7_02_v3	PF3D7_0211300	ubiquinol-cytochrome-c reductase complex assembly factor 1, putative	-0.00781	-0.038373	0.006693	-0.018683	-0.02262	0.005949	-0.018767	-0.068248	-0.05235	-0.0417	-0.103968	-0.05235
Pf3D7_02_v3	458829	461768	Pf3D7_02_v3	PF3D7_0211400	beta-ketoacyl-ACP synthase III	-0.070123	-0.003408	-0.045456	-0.025722	-0.016615	-0.000599	0.007979	0.017306	-0.069236	-0.019899	-0.072719	-0.069236
Pf3D7_02_v3	462913	467150	Pf3D7_02_v3	PF3D7_0211500	GAF domain-related protein, putative	0.023015	0.005741	-0.035026	0.008241	-0.058911	0.042485	-0.064852	-0.003708	0.072576	0.065735	0.014161	0.072576
Pf3D7_02_v3	467597	468726	Pf3D7_02_v3	PF3D7_0211600	UDP-N-acetylglucosamine transferase subunit ALG14, putative	0.017469	0.082069	0.055844	0.067187	0.02285	0.019469	-0.014324	0.030265	0.062568	0.107845	0.086247	0.062568
Pf3D7_02_v3	469540	473741	Pf3D7_02_v3	PF3D7_0211700	tyrosine kinase-like protein, putative	0.036659	0.012045	0.028822	0.050456	0.002161	0.08152	0.017618	0.00828	-0.000943	-0.04616	0.007283	-0.000943
Pf3D7_02_v3	474992	477253	Pf3D7_02_v3	PF3D7_0211800	asparagine--tRNA ligase	0.003501	0.034666	0.011655	0.028622	-0.016519	0.072649	0.040832	-0.008602	0.021358	0.007221	-0.00839	0.021358
Pf3D7_02_v3	477254	479341	Pf3D7_02_v3	PF3D7_0211900	pseudouridine synthase, putative	-0.007883	0.012386	-0.042965	0.010225	0.013699	0.024966	-0.130437	-0.039899	-0.054659	-0.225285	-0.096889	-0.054659
Pf3D7_02_v3	479850	481682	Pf3D7_02_v3	PF3D7_0212000	GDP-fructose:GMP antiporter, putative	-0.104713	-0.056427	-0.017854	-0.030101	-0.064498	0.01992	-0.040043	-0.069845	-0.11053	0.019243	-0.092768	-0.11053
Pf3D7_02_v3	483186	489220	Pf3D7_02_v3	PF3D7_0212100	conserved Plasmodium protein, unknown function	-0.026171	0.039335	0.028637	0.039248	0.006155	0.065675	0.045491	0.029422	0.071081	0.063798	0.049084	0.071081
Pf3D7_02_v3	489654	491068	Pf3D7_02_v3	PF3D7_0212200	ribosomal protein L12, mitochondrial, putative	0.041034	-0.023922	0.019304	0.008991	-0.009418	0.007878	0.01949	0.019658	-0.066992	0.051012	-0.039732	-0.066992
Pf3D7_02_v3	492366	494556	Pf3D7_02_v3	PF3D7_0212300	peptide chain release factor subunit 1, putative	0.052627	-0.095879	0.092203	0.002044	-0.021535	-0.026113	0.055977	-0.027061	0.013623	0.104212	-0.012787	0.013623
Pf3D7_02_v3	494916	508104	Pf3D7_02_v3	PF3D7_0212400	conserved Plasmodium membrane protein, unknown function	0.00753	0.015699	0.109361	0.021078	0.017635	0.088968	-0.023592	0.076067	0.116281	0.055454	0.029141	0.116281
Pf3D7_02_v3	509275	521996	Pf3D7_02_v3	PF3D7_0212500	conserved Plasmodium protein, unknown function	0.013566	0.005895	0.038405	0.00436	0.017113	-0.007865	-0.021292	-0.0134	-0.024614	0.067452	-0.048259	-0.024614
Pf3D7_02_v3	522681	524249	Pf3D7_02_v3	PF3D7_0212600	secreted protein with altered thrombospondin repeat domain	0.006402	-0.025113	0.008448	0.000876	-0.019192	0.006091	0.029569	0.029492	0.040984	0.071047	0.031757	0.040984
Pf3D7_02_v3	524450	526293	Pf3D7_02_v3	PF3D7_0212700	SRR1-like protein	0.172118	0.082069	0.009069	0.118326	0.040282	0.061802	0.000617	0.113763	0.083063	0.113221	0.063141	0.083063
Pf3D7_02_v3	527999	532173	Pf3D7_02_v3	PF3D7_0212800	multidrug efflux pump, putative	0.013795	-0.013052	-0.005695	-0.017169	-0.007266	-0.013979	-0.059168	0.025495	0.047354	-0.000295	0.000427	0.047354
Pf3D7_02_v3	533003	534600	Pf3D7_02_v3	PF3D7_0212900	arginyl-tRNA--protein transferase	-0.015736	0.038353	-0.017389	0.015775	0.030471	0.041976	0.006532	0.045725	0.052398	0.129138	0.038625	0.052398
Pf3D7_02_v3	535396	536396	Pf3D7_02_v3	PF3D7_0213000	conserved protein, unknown function	-0.063709	-0.024939	0.030947	0.012803	-0.034315	0.017221	0.04526	-0.012947	-0.005939	0.139357	-0.00153	-0.005939
Pf3D7_02_v3	537539	539670	Pf3D7_02_v3	PF3D7_0213100	protein SIS1	0.001348	0.00648	0.015943	-0.016145	0.033312	0.040063	-0.009626	-0.020264	0.045622	0.183443	0.042603	0.045622
Pf3D7_02_v3	541680	546145	Pf3D7_02_v3	PF3D7_0213400	protein kinase 7	-0.036169	-0.042133	-0.052545	-0.058589	-0.016537	-0.043935	0.051992	-0.017397	-0.023796	-0.045369	-0.039745	-0.023796
Pf3D7_02_v3	546232	555544	Pf3D7_02_v3	PF3D7_0213600	conserved Plasmodium protein, unknown function	0.020566	0.034999	-0.022059	0.000993	-0.01252	-0.000789	-0.0076	0.029244	-0.060055	0.035257	-0.017749	-0.060055
Pf3D7_02_v3	556798	557946	Pf3D7_02_v3	PF3D7_0213700	conserved protein, unknown function	0.056946	-0.019663	0.024997	-0.000157	0.004776	-0.026331	0.03429	-0.009115	0.010936	0.107848	-0.003339	0.010936
Pf3D7_02_v3	558335	560844	Pf3D7_02_v3	PF3D7_0213800	conserved protein, unknown function	-0.002514	-0.074031	-0.053398	0.024005	-0.019978	-0.009312	-0.073766	-0.056892	0.043051	-0.272305	0.071489	0.043051
Pf3D7_02_v3	560872	564872	Pf3D7_02_v3	PF3D7_0213900	RTR1 domain-containing protein, putative	-0.045917	-0.019097	0.000327	-0.005696	0.01615	-0.013656	0.000104	-0.033129	0.02283	0.061897	-0.006988	0.02283
Pf3D7_02_v3	565871	568144	Pf3D7_02_v3	PF3D7_0214000	T-complex protein 1 subunit theta	-0.105184	-0.050084	-0.010627	-0.046459	-0.110259	-0.005631	0.00549	-0.004202	-0.055678	-0.014201	-0.024037	-0.055678
Pf3D7_02_v3	568279	573565	Pf3D7_02_v3	PF3D7_0214100	protein transport protein SEC31	-0.034862	-0.009939	0.016087	0.012404	0.018168	0.010669	0.036048	0.026213	0.043612	0.075297	0.05514	0.043612
Pf3D7_02_v3	574905	576304	Pf3D7_02_v3	PF3D7_0214200	ribosomal protein L13, mitochondrial	0.069663	0.071869	0.002339	0.058315	-0.015815	0.048364	-0.060609	0.045851	0.089756	0.140836	0.04624	0.089756
Pf3D7_02_v3	578412	586414	Pf3D7_02_v3	PF3D7_0214300	conserved Plasmodium protein, unknown function	0.065651	0.005718	0.131429	0.0781	0.036991	0.087199	0.041269	0.065107	0.040814	0.036965	0.087017	0.040814
Pf3D7_02_v3	586515	589301	Pf3D7_02_v3	PF3D7_0214400	conserved protein, unknown function	-0.046559	-0.023866	0.022653	0.063062	-0.01446	-0.046859	0.039635	0.005258	0.026041	0.102564	0.005408	0.026041
Pf3D7_02_v3	590251	591671	Pf3D7_02_v3	PF3D7_0214500	conserved Plasmodium protein, unknown function	0.123206	0.130598	0.108905	0.111278	-0.008452	0.04325	0.109758	0.073209	-0.006704	0.118618	0.060618	-0.006704
Pf3D7_02_v3	593946	599584	Pf3D7_02_v3	PF3D7_0214600	serine/threonine protein kinase, putative	0.041066	0.043718	0.056265	0.007868	-0.036961	0.002596	-0.062231	-0.016057	-0.026623	-0.047102	-0.026082	-0.026623
Pf3D7_02_v3	599585	601962	Pf3D7_02_v3	PF3D7_0214700	conserved Plasmodium protein, unknown function	-0.042469	-0.024656	0.020959	-0.012936	-0.011281	-0.085769	-0.042312	-0.05945	0.008897	0.023074	0.035143	0.008897
Pf3D7_02_v3	604795	609575	Pf3D7_02_v3	PF3D7_0214800	conserved Plasmodium membrane protein, unknown function	0.010702	0.020325	0.066439	0.007019	0.027613	-0.013611	0.091438	0.040147	0.014586	0.081433	0.003462	0.014586
Pf3D7_02_v3	610375	615622	Pf3D7_02_v3	PF3D7_0214900	rhoptry neck protein 6	0.096902	0.099962	-0.062856	0.040043	-0.060675	0.027038	-0.036516	0.057195	-0.096238	0.097958	-0.014495	-0.096238
Pf3D7_02_v3	616522	619679	Pf3D7_02_v3	PF3D7_0215000	acyl-CoA synthetase	0.02074	0.007244	0.089801	0.014639	0.015335	0.042238	0.070466	0.039353	0.073989	0.068666	0.08252	0.073989
Pf3D7_02_v3	622274	624556	Pf3D7_02_v3	PF3D7_0215100	RING zinc finger protein, putative	-0.056007	-0.005197	0.018678	0.005802	-0.023418	-0.038375	0.061595	0.01532	-0.045907	-0.040546	-0.027082	-0.045907
Pf3D7_02_v3	626726	627960	Pf3D7_02_v3	PF3D7_0215200	conserved Plasmodium protein, unknown function	0.031514	-0.030544	-0.006484	0.102313	0.107251	-0.005209	0.047637	0.047675	-0.019949	-0.034772	-0.017544	-0.019949
Pf3D7_02_v3	628392	631558	Pf3D7_02_v3	PF3D7_0215300	acyl-CoA synthetase	0.053712	-0.008282	-0.013072	0.016019	0.039916	0.017811	0.037683	0.008773	0.005271	0.025031	0.019827	0.005271
Pf3D7_02_v3	634339	637757	Pf3D7_02_v3	PF3D7_0215400	conserved Plasmodium protein, unknown function	-0.013142	-0.058825	-0.029316	0.065652	-0.044367	-0.008448	0.00192	-0.024214	-0.089182	-0.132734	-0.022524	-0.089182
Pf3D7_02_v3	640150	642900	Pf3D7_02_v3	PF3D7_0215500	conserved Plasmodium protein, unknown function	0.165698	0.139253	0.048119	0.107283	0.031891	0.093798	0.120781	0.135974	0.124753	0.033452	0.114176	0.124753
Pf3D7_02_v3	642901	644567	Pf3D7_02_v3	PF3D7_0215600	conserved Plasmodium protein, unknown function	0.027262	-0.008246	-0.004364	0.029428	0.014233	0.017071	-0.007944	0.014338	-0.007942	-0.083378	-0.014538	-0.007942
Pf3D7_02_v3	645679	650335	Pf3D7_02_v3	PF3D7_0215700	DNA-directed RNA polymerase II subunit RPB2, putative	-0.044653	0.027438	0.001401	0.043693	-0.001075	0.069103	0.057954	0.057633	0.006099	-0.009977	-0.005082	0.006099
Pf3D7_02_v3	650413	653612	Pf3D7_02_v3	PF3D7_0215800	origin recognition complex subunit 5	0.024556	-0.051912	-0.042047	0.020827	-0.000466	0.029148	0.015668	-0.027092	0.001133	-0.094703	0.017278	0.001133
Pf3D7_02_v3	654668	657090	Pf3D7_02_v3	PF3D7_0215900	palmitoyltransferase DHHC11, putative	0.016453	0.03072	0.030074	0.012744	0.008921	-0.006124	-0.000677	0.049844	0.044782	0.061442	0.078897	0.044782
Pf3D7_02_v3	658386	664806	Pf3D7_02_v3	PF3D7_0216000	DEAD/DEAH box helicase, putative	0.020377	0.014004	-0.038789	0.005326	-0.02973	0.010066	-0.066655	0.013658	0.019022	0.030025	0.006389	0.019022
Pf3D7_02_v3	664807	668758	Pf3D7_02_v3	PF3D7_0216100	conserved Plasmodium protein, unknown function	-0.015849	0.025976	-0.018541	0.025346	0.027259	0.013932	0.036986	0.022846	0.080942	0.145863	0.081367	0.080942
Pf3D7_02_v3	668759	670091	Pf3D7_02_v3	PF3D7_0216200	conserved Plasmodium protein, unknown function	0.035174	-0.042591	-0.032371	-0.077896	-0.001006	-0.011465	-0.076123	-0.057485	0.000807	-0.091819	0.009059	0.000807
Pf3D7_02_v3	670163	674808	Pf3D7_02_v3	PF3D7_0216300	conserved Plasmodium protein, unknown function	0.015691	-0.024829	-0.037847	-0.002376	0.042832	-0.017472	-0.052375	0.033793	0.013272	-0.001871	0.056412	0.013272
Pf3D7_02_v3	675181	677849	Pf3D7_02_v3	PF3D7_0216400	vacuolar protein sorting-associated protein 45	-0.024845	-0.037397	-0.024377	-0.01414	-0.027809	-0.041377	-0.054472	-0.02179	0.003714	0.088061	-0.023838	0.003714
Pf3D7_02_v3	678237	683953	Pf3D7_02_v3	PF3D7_0216500	conserved Plasmodium protein, unknown function	-0.009548	0.011439	-0.027141	0.026138	-0.027303	0.006291	-0.007745	0.044621	-0.024659	-0.035674	-0.032959	-0.024659
Pf3D7_02_v3	686235	688795	Pf3D7_02_v3	PF3D7_0216600	MtN3-like protein	-0.156752	-0.101764	-0.012612	-0.044466	-0.036736	-0.045268	0.037036	-0.023181	-0.032472	-0.12973	0.055155	-0.032472
Pf3D7_02_v3	690061	695988	Pf3D7_02_v3	PF3D7_0216700	autophagy-related protein 11, putative	-0.070576	0.105218	-0.004721	0.032454	-0.046235	-0.039519	0.076683	-0.000338	0.048175	-0.030956	-0.063706	0.048175
Pf3D7_02_v3	695989	699811	Pf3D7_02_v3	PF3D7_0216800	TMEM121 domain-containing protein, putative	-0.009263	0.014186	-0.041188	0.012736	-0.052993	-1.3e-05	-0.062541	-0.011868	-0.071361	0.002689	-0.125788	-0.071361
Pf3D7_02_v3	700995	702992	Pf3D7_02_v3	PF3D7_0216900	conserved Plasmodium protein, unknown function	-0.005533	0.013224	-0.018951	0.011577	-0.023792	-0.040812	-0.024584	-0.008165	-0.03598	-0.001146	-0.028427	-0.03598
Pf3D7_02_v3	702993	706837	Pf3D7_02_v3	PF3D7_0217000	conserved Plasmodium membrane protein, unknown function	0.124875	0.07828	-0.054392	0.032595	-0.035905	-0.03094	-0.008741	0.028969	-0.046425	0.055879	-0.040164	-0.046425
Pf3D7_02_v3	707488	709596	Pf3D7_02_v3	PF3D7_0217100	ATP synthase subunit alpha, mitochondrial	0.01322	-0.027152	-0.045687	-0.044959	-0.066187	-0.085459	-0.007966	-0.065777	-0.00575	-0.043385	-0.033508	-0.00575
Pf3D7_02_v3	709597	715502	Pf3D7_02_v3	PF3D7_0217200	conserved Plasmodium protein, unknown function	-0.0383	-0.017484	-0.017329	0.016604	-0.060196	-0.056057	-0.067592	0.037101	-0.019221	-0.023453	-0.00742	-0.019221
Pf3D7_02_v3	715548	716799	Pf3D7_02_v3	PF3D7_0217300	AP-2 complex subunit sigma, putative	0.089404	0.112325	0.013996	0.065867	0.05453	0.011023	0.072966	0.037349	-0.015486	0.148546	0.040021	-0.015486
Pf3D7_02_v3	717442	718531	Pf3D7_02_v3	PF3D7_0217400	conserved protein, unknown function	0.021176	0.040193	-0.034795	0.016043	0.047908	-0.009803	0.020827	0.023647	-0.018825	-0.101067	0.02959	-0.018825
Pf3D7_02_v3	720187	722911	Pf3D7_02_v3	PF3D7_0217500	calcium-dependent protein kinase 1	-0.059589	-0.077192	-0.04847	-0.064365	0.002059	-0.113738	-0.041833	-0.026889	-0.10441	-0.084749	-0.083127	-0.10441
Pf3D7_02_v3	723497	730182	Pf3D7_02_v3	PF3D7_0217600	conserved Plasmodium protein, unknown function	0.008421	-0.021156	-0.018031	0.045814	0.020872	-0.001988	0.047575	0.032444	0.027972	-0.010334	0.019512	0.027972
Pf3D7_02_v3	730870	732562	Pf3D7_02_v3	PF3D7_0217700	E2F-associated phosphoprotein, putative	0.098113	0.02289	0.017811	0.098253	0.087116	0.021372	0.112514	0.047885	0.142424	0.042212	0.172328	0.142424
Pf3D7_02_v3	734022	734845	Pf3D7_02_v3	PF3D7_0217800	40S ribosomal protein S26	0.026418	-0.033973	-0.043448	0.024375	0.001676	0.010182	0.001431	-0.000486	0.007864	-0.025353	0.003436	0.007864
Pf3D7_02_v3	735188	737247	Pf3D7_02_v3	PF3D7_0217900	conserved Plasmodium protein, unknown function	0.030512	0.015785	0.020013	0.027288	0.063871	0.074168	0.129584	0.031888	0.054979	0.003008	0.065458	0.054979
Pf3D7_02_v3	738610	740102	Pf3D7_02_v3	PF3D7_0218000	replication factor C subunit 2, putative	0.049754	0.041214	0.07024	0.010089	0.027699	0.115723	0.083985	0.018621	-0.142421	-0.079515	0.004079	-0.142421
Pf3D7_02_v3	740764	742709	Pf3D7_02_v3	PF3D7_0218100	conserved protein, unknown function	0.027603	-0.128822	0.004906	-0.028057	0.009624	0.017396	-0.06196	-0.085834	-0.062606	-0.059946	-0.056259	-0.062606
Pf3D7_02_v3	743039	745962	Pf3D7_02_v3	PF3D7_0218200	SUZ domain-containing protein, putative	0.02417	0.059743	0.071468	0.124833	0.010828	0.055661	0.029779	0.026964	0.089881	-0.21209	0.08878	0.089881
Pf3D7_02_v3	747316	749615	Pf3D7_02_v3	PF3D7_0218300	rRNA methyltransferase, putative	-0.05149	0.001026	-0.002831	0.000813	-0.043958	-0.05887	-0.137517	-0.033523	-0.032354	0.024098	-0.063971	-0.032354
Pf3D7_02_v3	749799	751987	Pf3D7_02_v3	PF3D7_0218400	ATP-dependent RNA helicase DDX47, putative	0.096946	0.033591	0.06298	0.083345	-0.000424	0.031453	0.027563	0.035886	0.070557	0.091613	0.109339	0.070557
Pf3D7_02_v3	752716	753689	Pf3D7_02_v3	PF3D7_0218500	small nuclear ribonucleoprotein Sm D2, putative	0.077233	0.015229	0.022547	0.020143	0.02174	0.021191	0.002586	0.069857	-0.009436	-0.008062	0.038688	-0.009436
Pf3D7_02_v3	755168	762810	Pf3D7_02_v3	PF3D7_0218600	patatin-like phospholipase, putative	-0.019071	-0.056699	-0.004874	-0.071699	0.00991	-0.073175	-0.013149	-0.055067	-0.086508	-0.004189	-0.051689	-0.086508
Pf3D7_02_v3	763241	765441	Pf3D7_02_v3	PF3D7_0218700	pre-mRNA-processing protein 45, putative	-0.013152	-0.050488	-0.096188	-0.042081	-0.118291	-0.058965	0.039147	-0.085748	-0.030724	-0.120994	-0.043311	-0.030724
Pf3D7_02_v3	766140	767265	Pf3D7_02_v3	PF3D7_0218800	ribonuclease P	0.086199	0.120498	0.114827	0.078097	0.090762	0.061459	0.057744	0.112776	0.130991	0.120209	0.120461	0.130991
Pf3D7_02_v3	769511	771291	Pf3D7_02_v3	PF3D7_0219100	saccharopine dehydrogenase, putative	0.021326	0.013014	-0.049226	-0.018499	0.019388	0.014313	-0.038133	-0.033363	-0.031053	-0.027464	-0.050643	-0.031053
Pf3D7_02_v3	774565	776286	Pf3D7_02_v3	PF3D7_0219400	ribosome associated membrane protein RAMP4, putative, unspecified product	-0.010254	0.034947	-0.114472	0.026666	0.055179	0.065441	0.106292	0.0315	0.033496	0.130048	-0.026607	0.033496
Pf3D7_02_v3	776578	778315	Pf3D7_02_v3	PF3D7_0219500	pseudouridine synthase, putative	0.201801	0.095356	0.068181	0.043008	0.099255	0.175398	-0.058804	0.111433	0.003464	-0.08325	-0.00273	0.003464
Pf3D7_02_v3	779168	782382	Pf3D7_02_v3	PF3D7_0219600	replication factor C subunit 1, putative	-0.020909	-0.049336	-0.032855	0.034751	0.052352	0.009323	0.03185	0.001193	-0.00687	-0.039091	-0.052421	-0.00687
Pf3D7_02_v3	783473	785078	Pf3D7_02_v3	PF3D7_0219700	Plasmodium exported protein (PHISTc), unknown function	-0.010471	0.077316	0.04806	0.060871	0.101804	0.087103	0.100991	0.174	0.107632	0.202098	0.085057	0.107632
Pf3D7_02_v3	786620	788190	Pf3D7_02_v3	PF3D7_0219800	Plasmodium exported protein (PHISTc), unknown function	-0.025107	-0.099427	-0.012622	-0.02696	0.069079	-0.048874	0.031451	0.01085	-0.016185	0.010012	-0.049384	-0.016185
Pf3D7_02_v3	791214	792631	Pf3D7_02_v3	PF3D7_0219900	Plasmodium exported protein, unknown function	0.041754	-0.039844	-0.12023	0.030097	-0.040145	-0.070075	-0.009571	-0.053109	-0.014616	-0.039983	-0.129034	-0.014616
Pf3D7_02_v3	796502	801836	Pf3D7_02_v3	PF3D7_0220000	liver stage antigen 3	0.061332	-0.017633	0.035923	0.048626	-0.009898	-0.011226	0.010684	0.022566	0.001779	0.006994	-0.041943	0.001779
Pf3D7_02_v3	804270	807991	Pf3D7_02_v3	PF3D7_0220100	DnaJ protein, putative	0.10887	0.144487	0.089754	0.12884	0.031303	0.037523	0.026665	0.033355	0.03469	-0.167847	0.11265	0.03469
Pf3D7_02_v3	809261	810548	Pf3D7_02_v3	PF3D7_0220200	Plasmodium exported protein, unknown function	0.014857	-0.049762	-0.053709	-0.035919	0.079572	-0.021639	-0.018395	-0.017839	-0.110606	-0.161447	-0.105553	-0.110606
Pf3D7_02_v3	813577	814904	Pf3D7_02_v3	PF3D7_0220300	Plasmodium exported protein, unknown function	0.081653	-0.017073	-0.112399	-0.03601	-0.003634	-0.029629	-0.021843	0.03324	0.001066	-0.079222	-0.048477	0.001066
Pf3D7_02_v3	820179	822791	Pf3D7_02_v3	PF3D7_0220400	DnaJ protein, putative, pseudogene	-0.053442	-0.064049	-0.044174	-0.112727	-0.102631	-0.107274	-0.021404	-0.154769	-0.019897	-0.062401	-0.071003	-0.019897
Pf3D7_02_v3	823575	825114	Pf3D7_02_v3	PF3D7_0220500	Plasmodium exported protein (hyp2), unknown function	0.067167	0.04777	0.126638	0.043213	0.088851	0.125724	0.125814	0.065567	0.113498	0.229741	0.13775	0.113498
Pf3D7_02_v3	830939	832255	Pf3D7_02_v3	PF3D7_0220600	Plasmodium exported protein (hyp9), unknown function	0.005317	-0.014551	0.069127	0.008082	-0.006006	-0.034471	-0.018	-0.003304	0.041069	-0.064191	-0.012444	0.041069
Pf3D7_02_v3	833555	834938	Pf3D7_02_v3	PF3D7_0220700	Plasmodium exported protein (hyp9), unknown function	0.09985	0.155451	0.054426	0.114811	0.039577	0.079115	0.10234	0.028926	0.074396	0.075317	-0.002117	0.074396
Pf3D7_02_v3	838593	844366	Pf3D7_02_v3	PF3D7_0220800	cytoadherence linked asexual protein 2	0.047928	0.025415	-0.03753	-0.033529	-0.092717	0.017426	0.046737	-0.040702	0.028551	0.001036	-0.064561	0.028551
Pf3D7_02_v3	845350	846625	Pf3D7_02_v3	PF3D7_0220900	Plasmodium exported protein, unknown function, pseudogene	0.108605	0.03589	0.090023	0.085943	0.049446	0.064515	-0.030159	-0.026323	0.126339	0.079985	0.055086	0.126339
Pf3D7_02_v3	847842	849369	Pf3D7_02_v3	PF3D7_0221000	Plasmodium exported protein, unknown function	-0.012302	-0.073423	-0.00417	-0.03256	0.042526	-0.12091	-0.031671	-0.11157	-0.113951	-0.081295	-0.009133	-0.113951
Pf3D7_02_v3	850802	852212	Pf3D7_02_v3	PF3D7_0221100	Plasmodium exported protein, unknown function, pseudogene	-0.145475	-0.021734	-0.03507	-0.138258	-0.029835	-0.133341	0.038487	-0.085831	-0.109847	0.050758	-0.180201	-0.109847
Pf3D7_02_v3	854716	855988	Pf3D7_02_v3	PF3D7_0221200	Plasmodium exported protein (hyp15), unknown function	0.134324	0.075557	0.077743	0.084772	0.079641	0.06851	-0.048899	0.095431	0.111443	-0.021164	0.049084	0.111443
Pf3D7_02_v3	857317	858925	Pf3D7_02_v3	PF3D7_0221300	Plasmodium exported protein, unknown function, pseudogene	-0.013971	0.023653	0.181117	-0.020086	0.024151	-0.014985	-0.010036	-0.065251	0.092116	0.043248	0.022019	0.092116
Pf3D7_02_v3	860216	861754	Pf3D7_02_v3	PF3D7_0221400	stevor	-0.014769	0.002194	0.175306	0.013614	0.065035	-0.042156	-0.028614	-0.070912	0.178187	0.069767	0.104677	0.178187
Pf3D7_02_v3	862829	864092	Pf3D7_02_v3	PF3D7_0221500	Pfmc-2TM Maurer's cleft two transmembrane protein, pseudogene	0.012591	-0.098675	0.069302	-0.040801	-0.03401	-0.09728	-0.066404	-0.059831	0.050758	-0.057855	-0.028054	0.050758
Pf3D7_02_v3	865666	866788	Pf3D7_02_v3	PF3D7_0221600	Plasmodium exported protein, unknown function, pseudogene	-0.216364	-0.035075	-0.177658	-0.170463	-0.07074	-0.279522	-0.083367	-0.08271	0.032863	-0.043727	-0.080732	0.032863
Pf3D7_02_v3	869258	871374	Pf3D7_02_v3	PF3D7_0221700	Plasmodium exported protein, unknown function	0.044212	-0.05466	0.147922	0.016995	-0.0139	-0.006961	-0.077953	-0.035101	0.150231	-0.013345	0.147298	0.150231
Pf3D7_02_v3	872881	873569	Pf3D7_02_v3	PF3D7_0221800	hypothetical protein	0.016895	0.002191	0.257078	-0.041219	-0.062747	-0.012873	-0.047406	-0.076045	0.150145	-0.069108	0.112778	0.150145
Pf3D7_02_v3	873667	875428	Pf3D7_02_v3	PF3D7_0221900	erythrocyte membrane protein 1 (PfEMP1), pseudogene	-0.081186	0.052468	0.224795	-0.091087	-0.063499	-0.008783	-0.058519	-0.08786	0.03363	-0.00428	0.023191	0.03363
Pf3D7_02_v3	886375	888052	Pf3D7_02_v3	PF3D7_0222400	rifin, pseudogene	-0.021501	-0.046869	0.202832	-0.020274	-0.04208	-0.000883	-0.070017	-0.030805	0.182999	-0.025515	0.169473	0.182999
Pf3D7_02_v3	889410	890995	Pf3D7_02_v3	PF3D7_0222500	rifin	0.066442	0.137432	0.245099	-0.014795	-0.047468	0.060772	-0.022526	0.098893	0.232954	0.3122	0.135212	0.232954
Pf3D7_02_v3	895976	897670	Pf3D7_02_v3	PF3D7_0222700	rifin	0.126263	0.313495	0.187794	0.160575	0.038346	0.166258	-0.005951	0.329573	0.200017	0.627511	0.151823	0.200017
Pf3D7_02_v3	899180	900695	Pf3D7_02_v3	PF3D7_0222800	stevor	0.072946	0.083634	0.391321	0.073237	0.096655	0.126326	-0.040955	0.108007	0.250873	0.149897	0.241211	0.250873
Pf3D7_02_v3	901244	903103	Pf3D7_02_v3	PF3D7_0222900	erythrocyte membrane protein 1 (PfEMP1), exon 2, pseudogene	-0.019444	-0.003275	0.261927	-0.055702	-0.004225	-0.090139	-0.03526	-0.094437	0.166627	0.06199	0.079499	0.166627
Pf3D7_02_v3	904301	906025	Pf3D7_02_v3	PF3D7_0223100	rifin	0.01712	-0.072421	0.25004	-0.002872	-0.018429	-0.011882	0.019478	-0.030542	0.212849	0.093288	0.162398	0.212849
Pf3D7_02_v3	916102	923898	Pf3D7_02_v3	PF3D7_0223500	erythrocyte membrane protein 1, PfEMP1	0.141781	0.036472	0.136074	0.166688	0.148049	0.043787	0.082022	0.140714	0.133681	0.022704	0.150213	0.133681
Pf3D7_03_v3	36715	44732	Pf3D7_03_v3	PF3D7_0300100	erythrocyte membrane protein 1, PfEMP1	0.063463	-0.000374	0.202944	0.011737	0.061201	0.004219	0.009391	-0.038731	0.089875	0.024637	0.056196	0.089875
Pf3D7_03_v3	61195	62964	Pf3D7_03_v3	PF3D7_0300700	rifin	0.051675	-0.022569	0.201759	0.015355	-0.002924	-0.105918	0.011799	0.003522	0.253316	0.365039	0.101418	0.253316
Pf3D7_03_v3	67678	68932	Pf3D7_03_v3	PF3D7_0300900	stevor-like	0.12856	0.043165	-0.058593	0.116598	0.166093	-0.065053	0.025761	0.072814	0.086556	0.121573	0.035549	0.086556
Pf3D7_03_v3	69210	72169	Pf3D7_03_v3	PF3D7_0301000	acyl-CoA synthetase	0.050658	-0.126644	-0.022211	-0.096345	-0.071376	-0.053262	-0.096581	-0.132288	-0.108627	-0.134893	-0.083487	-0.108627
Pf3D7_03_v3	76244	77724	Pf3D7_03_v3	PF3D7_0301100	Plasmodium exported protein (hyp13), unknown function	-0.028763	-0.011059	0.135865	0.007077	-0.104992	-0.106443	-0.124462	-0.046891	0.099527	0.064798	0.038284	0.099527
Pf3D7_03_v3	77945	80643	Pf3D7_03_v3	PF3D7_0301200	serine/threonine protein kinase, FIKK family	0.095224	-0.019473	-0.013225	-0.032063	-0.005326	-0.029083	-0.038143	-0.018679	0.002003	0.002695	-0.026398	0.002003
Pf3D7_03_v3	81761	83765	Pf3D7_03_v3	PF3D7_0301300	epoxide hydrolase 1	0.130039	0.041283	0.061364	0.060988	0.146651	0.030714	0.099977	0.075188	0.042199	-0.176734	0.001287	0.042199
Pf3D7_03_v3	85055	86381	Pf3D7_03_v3	PF3D7_0301400	Plasmodium exported protein, unknown function	0.02713	-0.060997	0.079318	-0.056037	0.032498	-0.070934	-0.071262	-0.010017	0.01727	-0.176514	0.046935	0.01727
Pf3D7_03_v3	88000	89481	Pf3D7_03_v3	PF3D7_0301500	Plasmodium exported protein, unknown function	0.130092	0.129893	0.006882	0.161577	0.209068	-0.02935	-0.000611	0.150119	0.085818	0.050774	0.078728	0.085818
Pf3D7_03_v3	90865	93713	Pf3D7_03_v3	PF3D7_0301600	Plasmodium exported protein (hyp1), unknown function	-0.050729	-0.004757	-0.042323	-0.092376	-0.027942	-0.140329	0.001187	-0.047916	-0.008746	-0.014865	-0.061049	-0.008746
Pf3D7_03_v3	96318	98157	Pf3D7_03_v3	PF3D7_0301700	Plasmodium exported protein, unknown function	-0.030852	-0.081665	-0.035279	-0.028289	-0.060203	-0.111291	-0.005984	-0.016809	0.02075	0.043516	0.020248	0.02075
Pf3D7_03_v3	104075	105531	Pf3D7_03_v3	PF3D7_0301800	Plasmodium exported protein, unknown function	-0.027772	0.036832	0.069388	-0.028731	0.033775	0.003068	-0.050631	-0.020059	0.000493	-0.164014	0.083986	0.000493
Pf3D7_03_v3	105663	107359	Pf3D7_03_v3	PF3D7_0301900	conserved protein, unknown function	-0.030113	-0.036687	0.039082	-0.04008	-0.039318	-0.04179	0.058358	-0.014747	0.080634	0.09047	0.061722	0.080634
Pf3D7_03_v3	107711	110130	Pf3D7_03_v3	PF3D7_0302000	pre-mRNA-splicing factor PRP46, putative	-0.025059	-0.038747	0.056116	-0.052079	-0.017227	0.010292	-0.047613	-0.042644	0.05885	0.115603	0.072961	0.05885
Pf3D7_03_v3	113820	118336	Pf3D7_03_v3	PF3D7_0302100	serine/threonine protein kinase	0.029413	0.051568	0.135535	0.023515	0.065543	0.055203	0.010357	-0.034493	0.190175	0.128943	0.203214	0.190175
Pf3D7_03_v3	119208	124985	Pf3D7_03_v3	PF3D7_0302200	cytoadherence linked asexual protein 3.2	-0.007482	-0.082387	0.103356	0.018254	0.018535	-0.031476	-0.025785	-0.051893	0.191047	0.031522	0.17137	0.191047
Pf3D7_03_v3	125742	130485	Pf3D7_03_v3	PF3D7_0302300	erythrocyte membrane protein 1 (PfEMP1), pseudogene	0.053865	-0.145998	0.033136	0.050343	-0.024327	-0.089611	-0.071416	-0.035368	0.096838	-0.434775	0.186202	0.096838
Pf3D7_03_v3	132082	133752	Pf3D7_03_v3	PF3D7_0302400	unspecified product	0.02393	-0.048557	0.110481	0.019715	0.032941	0.059524	0.009128	-0.034229	0.163383	0.05698	0.14811	0.163383
Pf3D7_03_v3	135168	140910	Pf3D7_03_v3	PF3D7_0302500	cytoadherence linked asexual protein 3.1	-0.02831	-0.031228	-0.005649	-0.02821	-0.04465	-0.02382	-0.025761	0.002647	-0.0053	0.036117	0.007944	-0.0053
Pf3D7_03_v3	141306	145903	Pf3D7_03_v3	PF3D7_0302600	ABC transporter B family member 4, putative	-0.030169	0.029799	-0.049202	0.005844	0.016064	0.058274	0.055776	0.007662	0.01381	-0.025832	0.037901	0.01381
Pf3D7_03_v3	146122	147306	Pf3D7_03_v3	PF3D7_0302700	CDGSH iron-sulfur domain-containing protein, putative	-0.015551	-0.103059	0.064376	-0.077461	0.065414	-0.012725	0.115197	0.035296	0.065702	0.12691	0.040941	0.065702
Pf3D7_03_v3	147796	149555	Pf3D7_03_v3	PF3D7_0302800	RNA-binding protein, putative	-0.017132	0.015573	0.025789	-0.015597	-0.019916	-0.016961	-0.008643	0.050416	0.014033	0.186485	0.037922	0.014033
Pf3D7_03_v3	151918	156396	Pf3D7_03_v3	PF3D7_0302900	exportin-1, putative	0.057255	0.063544	0.133491	0.009525	0.061882	0.055153	0.101234	0.018211	0.086913	0.210504	0.094248	0.086913
Pf3D7_03_v3	159103	161954	Pf3D7_03_v3	PF3D7_0303000	N-ethylmaleimide-sensitive fusion protein	-0.103296	-0.087115	-0.055117	-0.089946	-0.081591	-0.086181	-0.058797	-0.066305	-0.068582	-0.079408	-0.041134	-0.068582
Pf3D7_03_v3	162528	167353	Pf3D7_03_v3	PF3D7_0303100	CLP1 P-loop domain-containing protein, putative	0.00126	-0.011422	0.059216	-0.011303	-0.003553	-0.00538	-0.007355	-0.001135	0.093224	0.133379	0.086879	0.093224
Pf3D7_03_v3	169321	174550	Pf3D7_03_v3	PF3D7_0303200	HAD superfamily protein, putative	-0.034571	-0.03716	0.042157	0.055312	0.055058	-0.026755	0.013387	-0.047297	0.062264	-0.111542	0.091696	0.062264
Pf3D7_03_v3	174772	176049	Pf3D7_03_v3	PF3D7_0303300	DNA-directed RNA polymerases I, II, and III subunit RPABC2, putative	-0.010561	-0.035315	-0.016204	-0.017312	-0.049053	-0.036081	-0.004743	-0.035697	0.049179	0.004638	-0.047497	0.049179
Pf3D7_03_v3	178170	181377	Pf3D7_03_v3	PF3D7_0303400	palmitoyltransferase DHHC1	0.00105	-0.054783	0.01509	-0.003427	-0.027265	-0.024065	0.027768	0.007604	0.046367	-0.129152	0.036049	0.046367
Pf3D7_03_v3	182481	189661	Pf3D7_03_v3	PF3D7_0303500	spindle pole body protein, putative	0.066155	-0.00834	0.197368	0.074567	0.008435	0.035041	-0.056624	-0.007927	0.020984	-0.005589	0.125785	0.020984
Pf3D7_03_v3	189930	190969	Pf3D7_03_v3	PF3D7_0303600	plasmoredoxin	-0.000118	-0.039962	0.038735	-0.05036	-0.096391	-0.084115	0.020613	-0.017459	0.003685	-0.047467	0.075983	0.003685
Pf3D7_03_v3	190995	192841	Pf3D7_03_v3	PF3D7_0303700	lipoamide acyltransferase component of branched-chain alpha-keto acid dehydrogenase complex	-0.044189	-0.012308	0.001816	-0.062496	-0.029671	-0.087004	-0.000981	-0.01772	-0.017221	0.018859	0.008705	-0.017221
Pf3D7_03_v3	194180	196390	Pf3D7_03_v3	PF3D7_0303800	IBR domain protein, putative	0.041609	0.050674	0.153741	0.027508	0.031866	-0.000623	0.009697	0.05694	0.085871	0.122217	0.093939	0.085871
Pf3D7_03_v3	196391	197688	Pf3D7_03_v3	PF3D7_0303900	phosphatidylethanolamine-binding protein, putative	-0.034929	-0.020857	0.007755	0.016416	-0.01206	0.022826	-0.010985	-0.061234	0.021018	0.074715	0.020145	0.021018
Pf3D7_03_v3	198292	201834	Pf3D7_03_v3	PF3D7_0304000	inner membrane complex protein 1a, putative	-0.10731	-0.050526	-0.06022	-0.11858	-0.088746	-0.082739	-0.083862	-0.06874	-0.092699	-0.050316	-0.097576	-0.092699
Pf3D7_03_v3	204292	206369	Pf3D7_03_v3	PF3D7_0304100	inner membrane complex protein 1e, putative	0.027767	-0.051256	-0.040805	-0.032469	-0.07594	-0.103989	-0.01746	-0.043061	-0.007394	0.047161	-0.019406	-0.007394
Pf3D7_03_v3	207092	209169	Pf3D7_03_v3	PF3D7_0304200	EH domain-containing protein	-0.015378	-0.026996	-0.082811	-0.082197	-0.002978	-0.050066	0.016353	-0.027648	-0.039202	-0.023592	-0.02974	-0.039202
Pf3D7_03_v3	212033	216822	Pf3D7_03_v3	PF3D7_0304300	conserved Plasmodium protein, unknown function	-0.18958	-0.101165	-0.14171	-0.103528	-0.131715	-0.108962	-0.065729	-0.160253	-0.162666	0.090346	-0.117673	-0.162666
Pf3D7_03_v3	217691	218739	Pf3D7_03_v3	PF3D7_0304400	60S ribosomal protein L44	0.101409	0.141794	0.133343	0.122384	0.111908	0.018536	0.161676	0.180675	0.393249	0.231327	0.29046	0.393249
Pf3D7_03_v3	218867	220122	Pf3D7_03_v3	PF3D7_0304500	1-cys-glutaredoxin-like protein-1	0.00225	0.031925	-0.021791	-0.021482	-0.04884	-0.102609	-0.004825	0.029511	0.102874	-0.022522	-0.020775	0.102874
Pf3D7_03_v3	221073	222766	Pf3D7_03_v3	PF3D7_0304600	circumsporozoite (CS) protein	-0.010234	-0.03388	-0.027858	-0.020109	0.026773	-0.045415	0.023965	0.029591	0.103429	-0.058127	0.004377	0.103429
Pf3D7_03_v3	223910	226043	Pf3D7_03_v3	PF3D7_0304700	conserved Plasmodium protein, unknown function	-0.061721	0.00201	0.040547	-0.000116	-0.028704	-0.058904	0.102137	0.049863	0.173431	0.094141	0.124786	0.173431
Pf3D7_03_v3	226807	231595	Pf3D7_03_v3	PF3D7_0304800	conserved Plasmodium membrane protein, unknown function	-0.077739	-0.04325	0.018567	-0.054936	-0.031263	0.033346	-0.014833	-0.032129	-0.018898	0.07314	0.011978	-0.018898
Pf3D7_03_v3	231596	232555	Pf3D7_03_v3	PF3D7_0304900	conserved protein, unknown function	-0.032381	-0.034275	0.004127	-0.029427	-0.017873	-0.009323	-0.018702	-0.003518	0.02581	0.02696	0.063097	0.02581
Pf3D7_03_v3	233808	235584	Pf3D7_03_v3	PF3D7_0305000	elongation factor Ts	0.003468	0.030158	0.003585	0.012882	-0.003229	-0.068842	0.01841	0.049496	-0.014548	0.076602	-0.006182	-0.014548
Pf3D7_03_v3	236084	248520	Pf3D7_03_v3	PF3D7_0305100	conserved Plasmodium protein, unknown function	-0.023159	-0.085722	-0.039715	0.024556	-0.056662	-0.061117	0.029885	0.036338	-0.083572	-0.114763	-0.029789	-0.083572
Pf3D7_03_v3	250992	254911	Pf3D7_03_v3	PF3D7_0305200	conserved Plasmodium protein, unknown function	0.014411	0.051591	0.159051	0.071628	-0.020429	0.116913	0.018165	0.084321	-0.054766	-0.025254	0.005765	-0.054766
Pf3D7_03_v3	255026	258666	Pf3D7_03_v3	PF3D7_0305300	conserved Plasmodium membrane protein, unknown function	-0.036611	0.007461	0.014507	-0.029559	-0.02215	-0.001071	0.014673	-0.016306	-0.019061	-0.025754	0.02615	-0.019061
Pf3D7_03_v3	260082	261285	Pf3D7_03_v3	PF3D7_0305400	conserved protein, unknown function	-0.070011	-0.021109	-0.051424	-0.036609	0.010813	-0.119312	-0.004644	0.024437	-0.044614	-0.035113	-0.06865	-0.044614
Pf3D7_03_v3	261286	273536	Pf3D7_03_v3	PF3D7_0305500	conserved Plasmodium protein, unknown function	0.031424	0.106457	-0.004497	0.072245	0.007567	0.076209	-0.011021	0.071836	0.054261	-0.046972	0.101381	0.054261
Pf3D7_03_v3	275614	277967	Pf3D7_03_v3	PF3D7_0305600	DNA-(apurinic or apyrimidinic site) lyase, putative	-0.00885	-0.005629	-0.020706	-0.044867	0.00645	-0.058097	-0.043731	0.007915	-0.038914	-0.025781	0.0031	-0.038914
Pf3D7_03_v3	278706	280078	Pf3D7_03_v3	PF3D7_0305700	ubiquitin-conjugating enzyme E2, putative	0.04246	-0.011897	0.217696	0.010838	0.078488	0.051411	0.059013	0.024656	0.064411	-0.107645	0.078367	0.064411
Pf3D7_03_v3	281666	285419	Pf3D7_03_v3	PF3D7_0305800	P-loop containing nucleoside triphosphate hydrolase, putative	-0.016075	0.100612	0.101141	-0.032502	0.033811	-0.052185	0.043296	0.0057	-0.062697	0.015985	0.00344	-0.062697
Pf3D7_03_v3	286656	287569	Pf3D7_03_v3	PF3D7_0306000	conserved protein, unknown function	0.029137	0.030338	0.089342	0.033572	0.038308	0.008853	0.071565	0.036125	0.011979	0.097932	0.038506	0.011979
Pf3D7_03_v3	288387	290997	Pf3D7_03_v3	PF3D7_0306100	conserved Plasmodium protein, unknown function	0.050816	-0.005067	0.003324	0.032855	0.11914	0.055137	0.04633	0.068437	-0.005416	0.158922	0.044995	-0.005416
Pf3D7_03_v3	292693	294798	Pf3D7_03_v3	PF3D7_0306200	activator of Hsp90 ATPase	-0.004293	0.010491	0.021284	-0.016911	0.031584	-0.051458	-0.03022	-0.00085	-0.006244	-0.018417	0.044101	-0.006244
Pf3D7_03_v3	294857	296344	Pf3D7_03_v3	PF3D7_0306300	glutaredoxin 1	-0.028761	-0.014491	-0.102595	-0.061121	0.010051	-0.118586	-0.101122	-0.084324	-0.03136	0.038581	-0.03438	-0.03136
Pf3D7_03_v3	298267	300728	Pf3D7_03_v3	PF3D7_0306400	FAD-dependent glycerol-3-phosphate dehydrogenase, putative	0.100302	0.048376	0.088077	0.05706	0.034824	0.02194	0.051063	0.073059	0.072373	-0.069483	0.050885	0.072373
Pf3D7_03_v3	300757	302156	Pf3D7_03_v3	PF3D7_0306500	cytochrome c oxidase subunit ApiCOX35, putative	0.066958	0.105979	0.15895	0.051907	0.05147	0.131184	0.084122	0.064351	0.076126	-0.011832	0.118935	0.076126
Pf3D7_03_v3	302576	303333	Pf3D7_03_v3	PF3D7_0306600	ATP synthase-associated protein, putative	-0.011685	0.039917	-0.032737	-0.032561	0.031897	0.095508	0.04072	0.061229	-0.025282	0.016486	0.047727	-0.025282
Pf3D7_03_v3	305858	308234	Pf3D7_03_v3	PF3D7_0306800	T-complex protein 1 subunit beta	-0.044061	-0.018237	-0.035894	-0.008037	-0.0257	0.005696	0.02132	0.005863	-0.094415	-0.038563	-0.011119	-0.094415
Pf3D7_03_v3	310402	312055	Pf3D7_03_v3	PF3D7_0306900	40S ribosomal protein S23, putative	0.027036	-0.058805	-0.041233	-0.139558	-0.020264	-0.073359	-0.069493	-0.043316	0.019897	-0.031144	0.012291	0.019897
Pf3D7_03_v3	312443	313592	Pf3D7_03_v3	PF3D7_0307100	40S ribosomal protein S12, putative	-0.009777	-0.022989	-0.016069	-0.059973	-0.023146	-0.005278	-0.041398	0.018554	-0.003691	-0.003514	0.043866	-0.003691
Pf3D7_03_v3	314726	316486	Pf3D7_03_v3	PF3D7_0307200	60S ribosomal protein L7, putative	-0.038145	-0.024634	0.049814	-0.03274	-0.009752	0.008104	0.05146	-0.062653	0.120344	0.006332	0.107184	0.120344
Pf3D7_03_v3	318554	320586	Pf3D7_03_v3	PF3D7_0307300	microtubule-associated protein RP/EB family, putative	-0.010357	0.030235	0.035634	0.013063	-0.019822	0.044413	0.007653	0.062045	0.088835	0.015187	0.04745	0.088835
Pf3D7_03_v3	320800	322412	Pf3D7_03_v3	PF3D7_0307400	ATP-dependent Clp protease proteolytic subunit	0.017619	0.086795	0.050888	0.04472	0.025713	0.034909	0.017692	0.056187	0.118058	0.097234	0.114852	0.118058
Pf3D7_03_v3	322683	325086	Pf3D7_03_v3	PF3D7_0307500	spindle and kinetochore-associated protein 2, putative	0.006787	-0.009959	-0.0134	-0.002796	-0.044529	0.011235	-0.01094	0.008856	0.026369	0.102237	-0.023826	0.026369
Pf3D7_03_v3	325672	328585	Pf3D7_03_v3	PF3D7_0307600	conserved Plasmodium protein, unknown function	0.024152	-0.01981	-0.03603	0.007719	-0.009091	-0.00121	-0.029902	-0.001262	-0.021841	-0.075721	-0.024267	-0.021841
Pf3D7_03_v3	328586	335519	Pf3D7_03_v3	PF3D7_0307700	conserved Plasmodium protein, unknown function	-0.019583	-0.025707	-0.025881	-0.030983	-0.033953	-0.072057	0.004586	-0.027367	-0.05392	0.066328	-0.033209	-0.05392
Pf3D7_03_v3	336929	339528	Pf3D7_03_v3	PF3D7_0307800	conserved Plasmodium protein, unknown function	-0.011978	0.010659	-0.014377	-0.044356	-0.019645	-0.003361	-0.006954	-0.006893	-0.06786	-0.102155	-0.035682	-0.06786
Pf3D7_03_v3	339778	351902	Pf3D7_03_v3	PF3D7_0307900	conserved Plasmodium protein, unknown function	0.020674	0.014602	0.038011	0.038067	0.054475	0.01839	0.024031	0.02344	0.021754	0.092084	0.070278	0.021754
Pf3D7_03_v3	353299	355295	Pf3D7_03_v3	PF3D7_0308000	DNA polymerase delta small subunit, putative	-0.02194	-0.079742	-0.026937	-0.020311	-0.052366	-0.021171	-0.006062	-0.050053	0.055697	0.06404	0.042243	0.055697
Pf3D7_03_v3	356069	361704	Pf3D7_03_v3	PF3D7_0308100	zinc finger protein, putative	-0.168672	0.005794	0.007028	0.035762	-0.018687	-0.038703	-0.054487	0.038445	0.016707	0.20909	-0.070236	0.016707
Pf3D7_03_v3	362092	364483	Pf3D7_03_v3	PF3D7_0308200	T-complex protein 1 subunit eta	-0.063469	-0.034294	0.005051	-0.051449	-0.051152	-0.040318	-0.005983	-0.05199	-0.079278	-0.022908	-0.063992	-0.079278
Pf3D7_03_v3	365409	366922	Pf3D7_03_v3	PF3D7_0308300	conserved Plasmodium protein, unknown function	-0.054643	-0.038414	-0.005574	-0.047417	-0.080057	-0.087439	0.001229	-0.033919	-0.048903	-0.004659	-0.077008	-0.048903
Pf3D7_03_v3	369675	371039	Pf3D7_03_v3	PF3D7_0308500	activator of Hsp90 ATPase, putative	0.016403	0.073525	-0.057302	0.008631	0.015175	-0.04026	0.068681	0.074017	0.03591	0.036226	-0.058286	0.03591
Pf3D7_03_v3	372382	374480	Pf3D7_03_v3	PF3D7_0308600	pre-mRNA-processing factor 19, putative	-0.045306	0.023273	0.055924	-0.01298	-0.027471	0.017734	0.01238	-0.006923	0.031924	0.053621	0.021801	0.031924
Pf3D7_03_v3	375556	377687	Pf3D7_03_v3	PF3D7_0308700	conserved protein, unknown function	-0.010453	-0.00554	0.022557	-0.008648	0.037306	0.097319	0.056704	0.04653	0.053101	0.022136	0.041187	0.053101
Pf3D7_03_v3	377795	378767	Pf3D7_03_v3	PF3D7_0308800	conserved protein, unknown function	0.071683	0.084088	0.112152	0.102379	0.089021	0.074204	0.073419	0.067877	0.041858	0.092601	0.068483	0.041858
Pf3D7_03_v3	378880	383540	Pf3D7_03_v3	PF3D7_0308900	splicing factor 3B subunit 1, putative	-0.037455	-0.002238	0.001639	-0.008246	-0.049301	-0.015755	0.039671	0.003236	0.019665	0.000662	-0.010519	0.019665
Pf3D7_03_v3	384125	387049	Pf3D7_03_v3	PF3D7_0309000	dual specificity protein phosphatase	0.072018	0.116587	0.072663	0.053492	0.082279	0.115624	0.12321	0.140355	0.105865	0.107785	0.084641	0.105865
Pf3D7_03_v3	387050	388723	Pf3D7_03_v3	PF3D7_0309100	conserved Plasmodium protein, unknown function	-0.035705	-0.041997	-0.137645	-0.092594	-0.05516	-0.078006	-0.017425	-0.045253	-0.053829	0.031591	-0.021897	-0.053829
Pf3D7_03_v3	388887	394854	Pf3D7_03_v3	PF3D7_0309200	serine/threonine protein kinase, putative	0.106293	-0.025978	0.086084	-0.043403	-0.05345	-0.074899	0.013901	-0.001353	0.074736	-0.10529	0.036523	0.074736
Pf3D7_03_v3	397399	400766	Pf3D7_03_v3	PF3D7_0309300	N2227-like protein, putative	0.044946	0.012846	0.040171	0.034587	0.075829	0.005284	0.10014	0.072398	0.070892	-0.037622	0.058666	0.070892
Pf3D7_03_v3	402683	405690	Pf3D7_03_v3	PF3D7_0309500	asparagine synthetase [glutamine-hydrolyzing], putative	0.009715	0.021522	0.025163	0.041621	0.074908	0.022655	-0.006821	0.046661	0.008651	-0.019824	0.002994	0.008651
Pf3D7_03_v3	407730	408568	Pf3D7_03_v3	PF3D7_0309600	60S acidic ribosomal protein P2	-0.029148	-0.030175	-0.057955	-0.019162	0.00842	-0.020997	-0.003567	-0.00187	-0.025284	-0.114449	0.005205	-0.025284
Pf3D7_03_v3	408852	411178	Pf3D7_03_v3	PF3D7_0309700	SECIS-binding protein 2, putative	0.036386	0.054839	-0.027425	-0.079917	-0.012744	-0.047633	-0.010577	0.051355	-0.095216	0.059442	-0.077997	-0.095216
Pf3D7_03_v3	411839	413998	Pf3D7_03_v3	PF3D7_0309800	YTH domain-containing protein, putative	0.00212	-0.034567	-0.006708	0.009337	0.017684	-0.046825	0.006744	0.018526	-0.030793	0.004864	0.001425	-0.030793
Pf3D7_03_v3	413999	419923	Pf3D7_03_v3	PF3D7_0309900	conserved Plasmodium protein, unknown function	-0.005853	0.006927	0.020247	0.015385	0.009592	0.022231	0.032579	0.051933	0.033903	0.051886	0.039618	0.033903
Pf3D7_03_v3	420447	421765	Pf3D7_03_v3	PF3D7_0310000	50S ribosomal protein L9, apicoplast, putative	-0.039721	0.009217	-0.017866	-0.056625	-0.122758	-0.075182	0.012089	0.003371	-0.091527	0.056143	-0.071352	-0.091527
Pf3D7_03_v3	422129	424930	Pf3D7_03_v3	PF3D7_0310100	calcium-dependent protein kinase 3	0.01808	0.024881	0.032855	0.027099	0.046295	0.049518	0.054055	0.054395	0.038448	-0.043989	0.014763	0.038448
Pf3D7_03_v3	427040	441192	Pf3D7_03_v3	PF3D7_0310200	phd finger protein, putative	-0.014702	-0.006303	-0.037547	0.019454	-0.018875	0.007641	0.021541	-0.004558	-0.028698	-0.034338	-0.033736	-0.028698
Pf3D7_03_v3	442470	446707	Pf3D7_03_v3	PF3D7_0310300	phosphoglycerate mutase, putative	0.091261	-0.031054	0.001564	0.110904	0.1588	0.043129	0.114287	0.090808	0.028774	-0.032396	0.020834	0.028774
Pf3D7_03_v3	447250	451634	Pf3D7_03_v3	PF3D7_0310400	parasite-infected erythrocyte surface protein	0.062367	0.041019	0.013344	-0.016777	-0.032467	0.060095	0.036296	-0.020964	-0.045148	0.035759	-0.076161	-0.045148
Pf3D7_03_v3	452047	459356	Pf3D7_03_v3	PF3D7_0310500	ATP-dependent RNA helicase DHX57, putative	0.122299	0.046142	0.025002	0.107163	0.098266	0.093908	0.094449	0.062931	-0.054255	-0.08296	0.072442	-0.054255
Pf3D7_03_v3	460925	462277	Pf3D7_03_v3	PF3D7_0310600	eukaryotic translation initiation factor 3 subunit K, putative, unspecified product	0.017229	0.037089	-0.050939	0.022836	0.010571	0.034263	0.053794	0.009242	-0.029269	0.028676	0.004949	-0.029269
Pf3D7_03_v3	463076	464468	Pf3D7_03_v3	PF3D7_0310700	trafficking protein particle complex subunit 4, putative	-0.018838	0.012706	-0.041983	-0.036692	-0.07986	0.009478	0.045445	-0.042287	-0.001641	-0.038431	-0.03202	-0.001641
Pf3D7_03_v3	464469	465241	Pf3D7_03_v3	PF3D7_0310800	conserved Plasmodium protein, unknown function	-0.00192	0.035876	0.043122	0.029253	0.042516	0.026101	0.063014	0.027306	0.057862	0.042235	0.053903	0.057862
Pf3D7_03_v3	465835	468695	Pf3D7_03_v3	PF3D7_0310900	conserved Plasmodium protein, unknown function	-0.019933	0.027794	0.034077	0.040545	0.038077	0.069363	0.060355	0.081142	0.015412	-0.007749	-0.006374	0.015412
Pf3D7_03_v3	469037	470368	Pf3D7_03_v3	PF3D7_0311000	conserved Plasmodium protein, unknown function	-0.056478	-0.044964	0.01143	-0.070479	-0.032956	-0.018452	0.011925	-0.016139	-0.066451	0.121894	-0.043493	-0.066451
Pf3D7_03_v3	470610	473411	Pf3D7_03_v3	PF3D7_0311100	pre-mRNA splicing factor, putative	-0.024369	-0.044962	-0.013552	-0.043852	-0.027263	0.008223	0.004183	-0.01484	-0.016576	0.0364	-0.047694	-0.016576
Pf3D7_03_v3	474538	479336	Pf3D7_03_v3	PF3D7_0311200	valine--tRNA ligase, putative	0.018282	-0.024816	-0.019999	0.009329	0.007494	-0.011949	0.063467	0.028391	0.027843	0.051101	-0.034243	0.027843
Pf3D7_03_v3	479872	483703	Pf3D7_03_v3	PF3D7_0311300	phosphatidylinositol 3- and 4-kinase, putative	0.039612	0.053773	0.077302	0.073501	0.042001	0.093281	0.055361	0.03826	0.054315	0.086559	0.086735	0.054315
Pf3D7_03_v3	488554	496760	Pf3D7_03_v3	PF3D7_0311400	kinase-related protein PKRP, putative	0.003198	-0.008791	-0.020241	-0.065162	-0.017532	0.011176	0.010163	-0.06311	-0.076096	0.082403	-0.093873	-0.076096
Pf3D7_03_v3	499352	502525	Pf3D7_03_v3	PF3D7_0311600	dolichyl-diphosphooligosaccharide--protein glycosyltransferase subunit OST1, putative	-0.084159	-0.059981	-0.060452	-0.05118	-0.086357	-0.074145	-0.038482	-0.063056	-0.07682	-0.140892	-0.088244	-0.07682
Pf3D7_03_v3	502526	506098	Pf3D7_03_v3	PF3D7_0311700	plasmepsin VI	0.089848	0.035112	0.098251	0.090393	0.0802	0.110261	0.055284	-0.029127	0.052588	0.016258	0.062953	0.052588
Pf3D7_03_v3	506405	509068	Pf3D7_03_v3	PF3D7_0311800	ATP synthase F0 subunit d-like protein, putative	0.026804	-0.032651	-0.03399	0.031232	-0.016319	-0.053948	0.043576	0.019502	-0.000986	-0.085155	-0.036282	-0.000986
Pf3D7_03_v3	509069	511847	Pf3D7_03_v3	PF3D7_0311900	heptatricopeptide repeat-containing protein, putative	0.096068	-0.028496	-0.07	0.002918	-0.001648	-0.055517	0.022341	-0.001332	0.015945	0.007846	0.005895	0.015945
Pf3D7_03_v3	511880	513201	Pf3D7_03_v3	PF3D7_0312000	conserved protein, unknown function	-0.018862	0.001356	-0.052623	-0.086404	-0.001833	-0.053039	0.044852	0.012561	-0.102727	0.082388	-0.13554	-0.102727
Pf3D7_03_v3	513502	516512	Pf3D7_03_v3	PF3D7_0312100	E3 ubiquitin-protein ligase	-0.022179	0.033946	-0.025485	0.020715	0.031707	0.06057	0.138448	0.085319	0.12835	0.182172	0.028097	0.12835
Pf3D7_03_v3	516543	520753	Pf3D7_03_v3	PF3D7_0312200	tetratricopeptide repeat protein, putative	-0.084543	-0.06186	-0.085449	-0.08052	-0.075105	0.006837	-0.020036	-0.018718	-0.100643	0.085485	-0.090562	-0.100643
Pf3D7_03_v3	521719	523133	Pf3D7_03_v3	PF3D7_0312300	26S proteasome regulatory subunit RPN12, putative	0.010355	0.076407	-0.140928	0.06586	0.106094	0.080311	0.007378	-0.005821	0.041422	-0.067107	0.03962	0.041422
Pf3D7_03_v3	523904	526689	Pf3D7_03_v3	PF3D7_0312400	glycogen synthase kinase 3	0.028367	0.039871	0.052472	0.046323	0.055016	0.047517	0.028607	-0.037907	0.032602	0.069624	0.054157	0.032602
Pf3D7_03_v3	528787	530994	Pf3D7_03_v3	PF3D7_0312500	major facilitator superfamily-related transporter, putative	-0.043246	0.001918	-0.035899	-0.041173	0.064048	0.049735	-0.012005	0.079846	-0.000363	0.088712	0.04489	-0.000363
Pf3D7_03_v3	533989	535488	Pf3D7_03_v3	PF3D7_0312800	60S ribosomal protein L26, putative	0.02335	-0.003839	-0.047509	-0.003389	0.045333	0.005721	-0.021101	0.031404	-0.025218	0.078275	0.00269	-0.025218
Pf3D7_03_v3	535793	537447	Pf3D7_03_v3	PF3D7_0312900	hypothetical protein	-0.030529	0.0664	-0.021538	-0.009445	-0.021585	0.131737	0.085317	0.039923	0.033294	0.272174	0.099102	0.033294
Pf3D7_03_v3	537448	539054	Pf3D7_03_v3	PF3D7_0313000	conserved Plasmodium protein, unknown function	0.111377	0.005395	0.074571	0.05065	0.03454	0.177005	0.087904	0.079104	0.130085	0.088461	0.074425	0.130085
Pf3D7_03_v3	539493	543025	Pf3D7_03_v3	PF3D7_0313100	ubiquitin-protein ligase, putative	-0.147595	-0.088208	-0.10451	-0.084743	-0.050544	-0.078964	-0.027831	-0.026962	-0.065666	-0.150539	-0.082537	-0.065666
Pf3D7_03_v3	543026	543998	Pf3D7_03_v3	PF3D7_0313200	conserved protein, unknown function	-0.025401	-0.021989	-0.025271	-0.051383	-0.078839	0.021642	-0.067179	-0.021026	0.008382	-0.089972	-0.078023	0.008382
Pf3D7_03_v3	543999	545444	Pf3D7_03_v3	PF3D7_0313300	YGGT family protein, putative	0.038197	0.086518	-0.023212	0.0377	-0.004731	0.043092	-0.051971	0.052086	0.064192	-0.015593	-0.03706	0.064192
Pf3D7_03_v3	545578	548432	Pf3D7_03_v3	PF3D7_0313400	conserved Plasmodium protein, unknown function	0.034057	0.106399	0.033546	0.061418	0.054231	0.095465	0.108612	0.085946	0.086671	0.155942	0.017764	0.086671
Pf3D7_03_v3	548468	551703	Pf3D7_03_v3	PF3D7_0313500	Ras-like G protein	0.067562	0.11065	0.09872	0.109651	0.093855	0.151493	0.150531	0.073284	0.1416	0.141077	0.104907	0.1416
Pf3D7_03_v3	551751	554828	Pf3D7_03_v3	PF3D7_0313600	conserved Plasmodium protein, unknown function	-0.02041	-0.0107	0.001752	0.044146	0.000454	0.067961	0.038462	0.017279	0.011111	-0.090481	-0.012144	0.011111
Pf3D7_03_v3	554829	558934	Pf3D7_03_v3	PF3D7_0313700	conserved Plasmodium protein, unknown function, unspecified product	0.076705	0.06348	0.068164	-0.02447	0.048505	0.102085	0.009965	0.11034	0.0169	0.084891	-0.001388	0.0169
Pf3D7_03_v3	559084	562309	Pf3D7_03_v3	PF3D7_0313800	conserved Plasmodium protein, unknown function	0.03827	0.101763	0.009868	0.094465	0.05734	0.109301	0.018014	0.057535	0.110184	-0.025914	0.075215	0.110184
Pf3D7_03_v3	562310	565906	Pf3D7_03_v3	PF3D7_0313900	conserved Plasmodium protein, unknown function	0.035171	0.035522	-0.006946	0.006261	0.030592	0.04838	0.015605	0.044206	-0.011329	-0.034944	-0.011922	-0.011329
Pf3D7_03_v3	566997	569079	Pf3D7_03_v3	PF3D7_0314000	HSP20-like chaperone, putative	-0.082043	-0.062026	-0.102272	-0.080399	-0.058089	0.012348	-0.083834	-0.158755	-0.155065	-0.210941	-0.055506	-0.155065
Pf3D7_03_v3	569080	571301	Pf3D7_03_v3	PF3D7_0314100	vesicle transport v-SNARE protein, putative	-0.025838	0.01615	0.030171	0.030237	-0.062777	0.066207	0.012421	-0.030741	-0.013553	0.149675	0.04751	-0.013553
Pf3D7_03_v3	572416	576915	Pf3D7_03_v3	PF3D7_0314200	conserved Plasmodium protein, unknown function	-0.076831	-0.044991	0.011617	-0.000778	0.023594	0.097876	-0.019543	-0.078306	-0.050226	-0.096399	-0.034346	-0.050226
Pf3D7_03_v3	576916	578616	Pf3D7_03_v3	PF3D7_0314300	DER1-like protein	-0.121836	0.066114	-0.015846	0.101623	-0.066013	0.023749	0.090219	-0.014058	-0.03002	-0.003758	0.014662	-0.03002
Pf3D7_03_v3	579289	580715	Pf3D7_03_v3	PF3D7_0314400	serine/threonine protein phosphatase 6, putative	-0.05494	-0.020024	-0.056357	-0.013425	-0.090347	-0.025641	-0.043283	-0.063055	-0.104945	-0.03469	-0.073281	-0.104945
Pf3D7_03_v3	583976	585418	Pf3D7_03_v3	PF3D7_0314500	conserved Plasmodium protein, unknown function	-0.100888	-0.070956	-0.037221	-0.049226	0.009693	0.078985	0.000245	-0.050763	-0.034251	-0.091148	-0.033725	-0.034251
Pf3D7_03_v3	586305	587581	Pf3D7_03_v3	PF3D7_0314600	conserved protein, unknown function	-0.162571	-0.011573	-0.137312	0.001344	-0.070191	0.059381	-0.062242	-0.026219	-0.080202	-0.077826	-0.021163	-0.080202
Pf3D7_03_v3	588752	592797	Pf3D7_03_v3	PF3D7_0314700	RING finger protein RNF1	-0.013127	0.003269	0.068667	-0.080835	-0.051869	0.052608	0.037477	-0.107967	0.007769	0.103256	0.030249	0.007769
Pf3D7_03_v3	604345	608181	Pf3D7_03_v3	PF3D7_0314800	conserved Plasmodium protein, unknown function	-0.032675	0.013116	0.033923	0.075399	0.078416	0.021212	0.124291	0.094333	0.024096	0.066057	0.080507	0.024096
Pf3D7_03_v3	608633	610968	Pf3D7_03_v3	PF3D7_0314900	conserved Plasmodium membrane protein, unknown function	-0.036981	0.039622	0.049806	0.032167	0.01944	0.050505	-0.001654	0.016877	0.122623	0.14484	0.110529	0.122623
Pf3D7_03_v3	611084	612264	Pf3D7_03_v3	PF3D7_0315000	zinc finger protein, putative	-0.062846	-0.026749	-0.034096	-0.033409	-0.039827	0.00249	-0.00686	-0.046078	-0.072636	0.08279	-0.030635	-0.072636
Pf3D7_03_v3	612489	613672	Pf3D7_03_v3	PF3D7_0315100	eukaryotic translation initiation factor 4E	-0.160834	-0.115716	-0.101498	-0.098555	-0.157115	-0.033212	-0.092964	-0.005666	-0.056291	-0.046523	-0.033215	-0.056291
Pf3D7_03_v3	616222	623066	Pf3D7_03_v3	PF3D7_0315200	circumsporozoite- and TRAP-related protein	0.021405	0.043663	0.031823	0.016325	-0.036151	0.010428	0.043589	0.019534	0.033759	0.128598	0.062415	0.033759
Pf3D7_03_v3	623196	630485	Pf3D7_03_v3	PF3D7_0315300	conserved Plasmodium protein, unknown function	-0.015836	0.059926	0.09598	0.003609	-0.027642	0.056286	0.025882	0.040903	0.040038	0.117305	0.065993	0.040038
Pf3D7_03_v3	630486	631631	Pf3D7_03_v3	PF3D7_0315400	conserved Plasmodium protein, unknown function	-0.056855	-0.059552	0.000491	0.004487	-0.039269	-0.042801	-0.009228	-0.027503	-0.021274	-0.126932	-0.010881	-0.021274
Pf3D7_03_v3	632596	633794	Pf3D7_03_v3	PF3D7_0315500	mitochondrial ribosomal protein L29/L47 precursor, putative	-0.02385	0.036314	-0.061714	-0.048717	-0.006432	0.024954	-0.030171	0.052827	-0.05465	0.05575	-0.034957	-0.05465
Pf3D7_03_v3	635336	637712	Pf3D7_03_v3	PF3D7_0315600	zinc finger protein, putative	-0.056554	-0.064603	-0.091158	-0.018112	-0.067547	-0.144489	-0.06245	-0.044333	-0.190049	-0.163458	-0.153755	-0.190049
Pf3D7_03_v3	638033	641394	Pf3D7_03_v3	PF3D7_0315700	conserved Plasmodium membrane protein, unknown function	0.016309	0.020065	0.090329	0.176637	0.044225	0.088359	-0.000575	0.118205	0.111163	0.140051	0.112918	0.111163
Pf3D7_03_v3	641395	642829	Pf3D7_03_v3	PF3D7_0315800	zinc finger protein, putative	0.013139	0.023279	0.033661	-0.076777	0.001207	0.035507	-0.014758	-0.039638	0.018312	-0.107068	0.018243	0.018312
Pf3D7_03_v3	643936	645518	Pf3D7_03_v3	PF3D7_0315900	conserved Plasmodium protein, unknown function	-0.009985	-0.028894	0.03424	0.01953	0.002149	-0.013258	0.030441	0.016341	0.025023	0.015733	0.012308	0.025023
Pf3D7_03_v3	645671	647094	Pf3D7_03_v3	PF3D7_0316000	microneme associated antigen	0.050386	0.103626	0.061107	0.048912	0.038117	0.108176	0.059109	0.079218	-0.004058	0.003695	0.028804	-0.004058
Pf3D7_03_v3	648385	649690	Pf3D7_03_v3	PF3D7_0316100	mitochondrial ribosomal protein L27 precursor, putative	-0.062147	0.008212	-0.018865	0.007424	-0.014746	0.007045	0.07583	0.045397	0.009415	0.007668	-0.026794	0.009415
Pf3D7_03_v3	649691	657497	Pf3D7_03_v3	PF3D7_0316200	conserved Plasmodium protein, unknown function	0.017506	0.076442	0.090624	0.041223	0.041433	0.083571	0.123878	0.063796	-0.044177	-0.087158	0.020369	-0.044177
Pf3D7_03_v3	658022	661884	Pf3D7_03_v3	PF3D7_0316300	inorganic pyrophosphatase, inorganic pyrophosphatase, putative	0.00864	0.054037	0.002511	0.024802	0.068044	0.047314	0.053949	0.035623	-0.012262	0.022802	-0.007468	-0.012262
Pf3D7_03_v3	661885	665402	Pf3D7_03_v3	PF3D7_0316400	conserved protein, unknown function	-0.118306	0.015087	-0.083945	-0.066353	-0.010844	-0.067721	-0.068082	-0.019105	-0.103126	-0.022382	-0.083724	-0.103126
Pf3D7_03_v3	666756	668641	Pf3D7_03_v3	PF3D7_0316500	kinetochore protein NUF2, putative	-0.004056	-0.000428	-0.05221	0.071964	-0.021542	-0.001987	0.031319	-0.021249	-0.005025	-0.032267	5.7e-05	-0.005025
Pf3D7_03_v3	669052	671123	Pf3D7_03_v3	PF3D7_0316600	formate-nitrite transporter	0.045134	0.057849	-0.005024	0.038665	0.091959	0.011435	-0.023324	0.033942	-0.024052	-0.034352	0.005212	-0.024052
Pf3D7_03_v3	674208	675886	Pf3D7_03_v3	PF3D7_0316700	protein YOP1, putative	-0.039626	0.036233	0.006557	0.078391	0.006892	-0.066817	0.026912	0.086686	-0.057529	0.081109	-0.04351	-0.057529
Pf3D7_03_v3	677592	678724	Pf3D7_03_v3	PF3D7_0316800	40S ribosomal protein S15A, putative	0.03772	0.022665	-0.004917	0.055302	0.017136	0.028294	-0.023669	0.003437	0.017815	0.011669	0.013025	0.017815
Pf3D7_03_v3	678984	681527	Pf3D7_03_v3	PF3D7_0316900	E3 ubiquitin-protein ligase, putative	0.022111	0.027212	-0.025073	0.032393	0.003408	0.038392	-0.016519	-0.016821	-0.021273	0.013905	-0.036795	-0.021273
Pf3D7_03_v3	682545	683935	Pf3D7_03_v3	PF3D7_0317000	proteasome subunit alpha type-3, putative	0.020246	0.008617	0.020343	0.024366	-0.000864	0.018581	0.010673	0.008321	-0.003119	-0.003823	-0.004255	-0.003119
Pf3D7_03_v3	686032	689732	Pf3D7_03_v3	PF3D7_0317100	6-cysteine protein	0.058176	0.033528	0.034959	0.058472	0.028452	0.072237	0.060235	0.040634	-0.03115	0.072533	-0.035696	-0.03115
Pf3D7_03_v3	689904	695065	Pf3D7_03_v3	PF3D7_0317200	cdc2-related protein kinase 4	-0.020239	0.035114	-0.004904	0.017761	-0.018589	0.024554	0.065661	-0.040525	-0.001611	-0.02401	0.012411	-0.001611
Pf3D7_03_v3	699294	709978	Pf3D7_03_v3	PF3D7_0317300	conserved Plasmodium protein, unknown function	-0.031377	-0.066121	0.032227	-0.010254	-0.042193	-0.065846	0.005345	-0.004929	-0.067403	-0.044321	0.046471	-0.067403
Pf3D7_03_v3	712003	714332	Pf3D7_03_v3	PF3D7_0317400	DNA replication complex GINS protein, putative	-0.024679	0.00762	0.006286	0.009647	-0.002754	0.00073	0.01329	0.047225	0.01338	0.054493	0.007117	0.01338
Pf3D7_03_v3	716273	722081	Pf3D7_03_v3	PF3D7_0317500	kinesin-5	0.007416	0.030088	0.004433	0.040871	-0.029427	0.081139	-0.00176	0.02338	0.079903	-0.032981	0.034988	0.079903
Pf3D7_03_v3	724765	726380	Pf3D7_03_v3	PF3D7_0317600	40S ribosomal protein S11, putative	0.066831	0.002167	0.024669	0.05868	0.016556	0.084414	0.006734	0.017944	0.023358	0.064503	0.017625	0.023358
Pf3D7_03_v3	728009	738140	Pf3D7_03_v3	PF3D7_0317700	CPSF (cleavage and polyadenylation specific factor), subunit A, putative	-0.045044	-0.084239	-0.065506	0.050618	-0.029524	-0.002605	0.041591	-0.049863	0.0546	-0.019693	-0.046113	0.0546
Pf3D7_03_v3	738141	739132	Pf3D7_03_v3	PF3D7_0317800	26S proteasome non-ATPase regulatory subunit 9, putative	0.08387	0.07284	0.060127	0.02	0.004433	0.04273	0.083345	-0.005686	0.021263	0.153185	0.046499	0.021263
Pf3D7_03_v3	739178	741962	Pf3D7_03_v3	PF3D7_0317900	conserved protein, unknown function	-0.002347	0.042876	0.040474	-0.002886	0.012256	0.018789	0.01536	0.033747	-0.012461	0.030492	-0.000235	-0.012461
Pf3D7_03_v3	741963	743049	Pf3D7_03_v3	PF3D7_0318000	conserved Plasmodium protein, unknown function	-0.068248	-0.025888	-0.030605	-0.006022	-0.043055	0.00061	-0.046879	-0.019305	-0.050926	0.05133	-0.00746	-0.050926
Pf3D7_03_v3	743679	745303	Pf3D7_03_v3	PF3D7_0318100	stomatin-like protein, putative	0.033162	0.035288	0.033729	0.060884	-0.035386	-0.009848	0.035215	0.05039	0.031297	0.030276	0.001169	0.031297
Pf3D7_03_v3	748215	756088	Pf3D7_03_v3	PF3D7_0318200	DNA-directed RNA polymerase II subunit RPB1	0.009465	0.01058	0.013246	0.020924	-0.019518	-0.019807	0.013979	0.014481	0.012499	-0.010389	0.005579	0.012499
Pf3D7_03_v3	756241	760542	Pf3D7_03_v3	PF3D7_0318300	conserved Plasmodium protein, unknown function	0.000363	0.010295	0.002328	0.009474	-0.04701	-0.047671	-0.017396	-0.007247	-9e-05	-0.006981	0.006378	-9e-05
Pf3D7_03_v3	761443	765689	Pf3D7_03_v3	PF3D7_0318400	conserved Plasmodium protein, unknown function	0.082924	-0.044744	0.082884	0.076676	-0.021503	-0.035004	0.144408	0.041967	0.008468	-0.055968	0.021152	0.008468
Pf3D7_03_v3	767565	782936	Pf3D7_03_v3	PF3D7_0318500	conserved Plasmodium protein, unknown function	0.037421	-0.013537	0.029696	-0.00241	-0.016248	-0.017891	-0.062126	0.008051	-0.075338	0.17179	-0.013434	-0.075338
Pf3D7_03_v3	782937	786415	Pf3D7_03_v3	PF3D7_0318600	cleavage and polyadenylation specificity factor, putative	-0.058953	-0.013701	0.059073	-0.017355	0.03789	-0.046689	0.058616	0.003287	0.079444	0.048862	0.060261	0.079444
Pf3D7_03_v3	788203	789062	Pf3D7_03_v3	PF3D7_0318700	conserved Plasmodium protein, unknown function	0.019375	0.003919	0.034284	0.026838	-0.010626	0.01442	-0.038485	0.031391	0.011693	0.043877	0.020394	0.011693
Pf3D7_03_v3	789608	791558	Pf3D7_03_v3	PF3D7_0318800	triosephosphate isomerase, putative	0.018571	0.065372	0.027311	0.017128	0.003216	0.017842	0.064647	-0.01525	-0.009241	0.073143	0.02648	-0.009241
Pf3D7_03_v3	791590	793731	Pf3D7_03_v3	PF3D7_0318900	conserved protein, unknown function	-0.002782	-0.002894	0.021827	-0.005349	-0.010713	-0.007393	-0.021576	-0.013751	0.060029	0.022915	0.033788	0.060029
Pf3D7_03_v3	795327	801421	Pf3D7_03_v3	PF3D7_0319000	P-type ATPase, putative	-0.003621	0.029608	0.00538	-0.020145	0.034645	-0.029815	0.054458	0.003384	-0.024734	0.076817	-0.046307	-0.024734
Pf3D7_03_v3	802010	802833	Pf3D7_03_v3	PF3D7_0319100	E3 ubiquitin-protein ligase RBX1, putative	0.036926	0.099832	0.091966	0.048509	0.030104	0.044388	0.059845	0.021626	0.059577	0.09099	0.073537	0.059577
Pf3D7_03_v3	803342	806562	Pf3D7_03_v3	PF3D7_0319200	CCR4 domain-containing protein 4, putative	0.011704	0.060562	0.089831	0.005882	-0.021039	0.043978	0.041301	0.017335	-0.028404	-0.006585	0.054164	-0.028404
Pf3D7_03_v3	807027	808109	Pf3D7_03_v3	PF3D7_0319300	ubiquitin-conjugating enzyme E2, putative	0.007686	0.122983	0.098702	-0.052811	0.023527	0.065483	0.157333	0.072563	-0.004921	0.137785	0.057997	-0.004921
Pf3D7_03_v3	809831	814422	Pf3D7_03_v3	PF3D7_0319400	kinesin-8, putative	0.017163	0.007996	0.039737	0.045229	0.018304	0.052547	0.03162	0.055042	0.04557	0.044876	0.088196	0.04557
Pf3D7_03_v3	815319	817105	Pf3D7_03_v3	PF3D7_0319500	RNA-binding protein, putative	-0.066297	0.057793	0.040746	0.071768	0.046211	0.026937	0.000642	0.1053	-0.008095	-0.172875	0.094258	-0.008095
Pf3D7_03_v3	817663	818945	Pf3D7_03_v3	PF3D7_0319600	elongation factor 1-delta, putative	0.004173	0.007776	0.069016	0.106424	0.010973	0.065918	0.122838	0.11319	0.117102	0.069078	0.114309	0.117102
Pf3D7_03_v3	820458	830939	Pf3D7_03_v3	PF3D7_0319700	ABC transporter I family member 1, putative	-0.016518	0.034391	0.038835	0.08556	-0.037395	0.020095	-0.017334	-0.008925	-0.01891	0.007034	0.027738	-0.01891
Pf3D7_03_v3	830940	832759	Pf3D7_03_v3	PF3D7_0319800	conserved Plasmodium protein, unknown function	0.081376	-0.045178	0.073088	0.098331	0.052811	-0.014683	-0.056204	0.083927	0.017256	-0.028885	0.120008	0.017256
Pf3D7_03_v3	833583	835027	Pf3D7_03_v3	PF3D7_0319900	conserved protein, unknown function	0.065757	0.070866	0.060902	0.114455	-0.018275	0.059822	0.025409	0.029352	0.030182	-0.100975	0.115622	0.030182
Pf3D7_03_v3	837057	838521	Pf3D7_03_v3	PF3D7_0320000	protein phosphatase inhibitor 2	-0.010682	0.014811	0.038833	-0.019123	-0.053559	-0.045824	-0.009038	-0.013202	-0.014023	-0.029428	0.017936	-0.014023
Pf3D7_03_v3	840112	842008	Pf3D7_03_v3	PF3D7_0320100	protein transport protein SEC22	-0.008979	-0.024667	-9.8e-05	-0.013472	0.002271	-0.001916	-0.011997	-0.029285	0.022966	0.018227	0.03259	0.022966
Pf3D7_03_v3	842289	844540	Pf3D7_03_v3	PF3D7_0320200	CPW-WPC family protein	0.070621	0.025666	0.06048	0.082312	0.075478	0.079579	-0.0058	0.063371	0.06245	-0.029169	0.052248	0.06245
Pf3D7_03_v3	845463	847570	Pf3D7_03_v3	PF3D7_0320300	T-complex protein 1 subunit epsilon	-0.005581	-0.071282	-0.027218	-0.041718	-0.016295	-0.059753	-0.027646	-0.050053	-0.080589	-0.095561	0.042081	-0.080589
Pf3D7_03_v3	847997	857754	Pf3D7_03_v3	PF3D7_0320400	oocyst capsule protein Cap380	-0.008097	0.068073	0.046956	0.04558	0.022122	0.04869	0.078132	0.072707	0.100146	0.111753	0.066532	0.100146
Pf3D7_03_v3	860563	862352	Pf3D7_03_v3	PF3D7_0320500	nicotinamidase, putative	-0.095674	-0.120568	-0.039971	-0.093552	-0.050036	-0.10669	-0.114112	-0.059093	-0.05433	-0.125156	-0.084076	-0.05433
Pf3D7_03_v3	862491	864082	Pf3D7_03_v3	PF3D7_0320600	conserved protein, unknown function	0.103242	0.036245	0.095955	0.105802	0.123774	0.140116	0.086896	0.113852	0.137647	0.133151	0.078567	0.137647
Pf3D7_03_v3	864764	866670	Pf3D7_03_v3	PF3D7_0320700	signal peptidase complex subunit 2	-0.028197	-0.036029	0.001615	0.010129	-0.016233	-0.058871	-0.026508	0.069421	0.034327	-0.214998	0.007777	0.034327
Pf3D7_03_v3	870567	872592	Pf3D7_03_v3	PF3D7_0320800	ATP-dependent RNA helicase DDX6	0.02425	-0.017924	0.051132	-0.035486	0.041705	-0.008185	0.022549	0.074108	0.07312	-0.044813	0.091413	0.07312
Pf3D7_03_v3	874963	876545	Pf3D7_03_v3	PF3D7_0320900	histone H2A.Z	0.062833	0.055123	0.112736	0.068505	0.054408	0.048657	0.096894	0.103105	0.104957	0.248202	0.123233	0.104957
Pf3D7_03_v3	877485	879735	Pf3D7_03_v3	PF3D7_0321000	conserved protein, unknown function	-0.007214	-0.03637	-0.043408	-0.066583	-0.003097	-0.05852	0.049812	0.011441	0.005608	-0.214115	0.019461	0.005608
Pf3D7_03_v3	879736	885743	Pf3D7_03_v3	PF3D7_0321100	conserved Plasmodium protein, unknown function	0.045712	-0.009595	0.041546	0.063775	0.00545	0.020427	0.08017	0.030624	0.074784	0.050664	0.077244	0.074784
Pf3D7_03_v3	886712	889226	Pf3D7_03_v3	PF3D7_0321200	UDP-N-acetylglucosamine--dolichyl-phosphate N-acetylglucosaminephosphotransferase, putative	0.024446	-0.04119	0.001994	-0.006962	-0.036933	-0.058067	-0.021878	0.00344	0.015033	0.062021	0.038501	0.015033
Pf3D7_03_v3	889764	893014	Pf3D7_03_v3	PF3D7_0321300	conserved Plasmodium protein, unknown function	0.004932	0.039565	0.082948	0.053298	0.008972	0.026494	0.014956	0.030748	0.063558	0.108685	0.08251	0.063558
Pf3D7_03_v3	894511	896329	Pf3D7_03_v3	PF3D7_0321400	protein kinase, putative	0.05646	0.012818	0.00051	0.03823	0.040304	0.012628	0.060763	0.026074	0.033256	0.060083	0.04248	0.033256
Pf3D7_03_v3	896330	900020	Pf3D7_03_v3	PF3D7_0321500	peptidase, putative	0.019544	-0.003808	0.055404	-0.002688	0.030393	0.029369	0.058173	0.026019	0.077577	0.11022	0.06605	0.077577
Pf3D7_03_v3	900607	903566	Pf3D7_03_v3	PF3D7_0321600	ATP-dependent RNA helicase DDX42, putative	0.044561	0.0205	0.044387	0.023278	-0.018047	0.04196	0.052617	0.027879	0.02624	0.094409	0.047678	0.02624
Pf3D7_03_v3	903567	910368	Pf3D7_03_v3	PF3D7_0321700	conserved Plasmodium protein, unknown function	-0.024728	0.069923	0.134235	0.031714	-0.01969	0.037648	0.129547	0.046461	0.035922	-0.044656	0.04725	0.035922
Pf3D7_03_v3	912666	921286	Pf3D7_03_v3	PF3D7_0321800	WD repeat-containing protein, putative	0.006693	0.051951	0.008603	-0.022017	0.009618	0.014445	0.050215	0.060384	0.035716	0.049486	0.026212	0.035716
Pf3D7_03_v3	922724	928192	Pf3D7_03_v3	PF3D7_0321900	cyclic amine resistance locus protein	0.067711	0.008511	0.074483	0.088904	0.037473	-0.024888	0.03885	0.012518	0.081729	0.142975	0.102136	0.081729
Pf3D7_03_v3	928394	929409	Pf3D7_03_v3	PF3D7_0322000	peptidyl-prolyl cis-trans isomerase	0.02817	0.035078	0.064046	0.084847	0.028608	0.016913	0.066139	0.055277	0.070414	0.117445	0.080826	0.070414
Pf3D7_03_v3	930390	932665	Pf3D7_03_v3	PF3D7_0322100	mRNA-capping enzyme subunit beta	0.044443	-0.038746	0.016885	-0.012886	-0.060373	-0.037395	-0.002738	0.012698	-0.046597	-0.002853	-0.083673	-0.046597
Pf3D7_03_v3	932938	937256	Pf3D7_03_v3	PF3D7_0322200	conserved Plasmodium protein, unknown function	0.045435	-0.002993	0.003492	-0.024982	-0.076302	-0.038991	-0.067075	-0.006852	-0.1051	0.023106	0.013178	-0.1051
Pf3D7_03_v3	937962	940423	Pf3D7_03_v3	PF3D7_0322300	diacylglycerol O-acyltransferase	0.07057	0.005211	0.07015	0.06468	0.055607	-0.02098	0.03173	0.05959	0.0657	0.027947	0.044119	0.0657
Pf3D7_03_v3	942295	945419	Pf3D7_03_v3	PF3D7_0322400	regulator of initiation factor 2 (eIF2)	0.049504	0.043229	0.088213	0.054019	0.067355	0.036768	0.044735	0.048467	0.114026	0.072051	0.060848	0.114026
Pf3D7_03_v3	945420	947001	Pf3D7_03_v3	PF3D7_0322500	iron-sulfur assembly protein, putative	-0.043693	0.095774	0.077502	0.028981	0.04293	0.029458	0.083376	-0.027714	0.043149	0.068372	0.113388	0.043149
Pf3D7_03_v3	948124	952828	Pf3D7_03_v3	PF3D7_0322600	conserved Plasmodium protein, unknown function	0.071786	-0.015624	0.130482	0.015952	0.008363	0.028987	-0.034181	-0.002065	0.102741	0.132082	0.04488	0.102741
Pf3D7_03_v3	952829	962617	Pf3D7_03_v3	PF3D7_0322700	conserved Plasmodium protein, unknown function	0.041038	0.049779	0.088821	0.016414	0.048301	0.020003	0.045089	0.065986	0.077542	0.063773	0.060235	0.077542
Pf3D7_03_v3	963851	965378	Pf3D7_03_v3	PF3D7_0322800	conserved Plasmodium protein, unknown function	0.032811	-0.06596	-0.008724	0.013466	0.056008	-0.019581	-0.062908	-0.011599	0.038049	-0.056884	-0.029364	0.038049
Pf3D7_03_v3	965379	966752	Pf3D7_03_v3	PF3D7_0322900	40S ribosomal protein S3A, putative	0.04707	-0.070691	-0.053627	0.043282	5e-05	-0.121411	-0.073673	-0.012689	-0.032819	-0.196608	-0.100229	-0.032819
Pf3D7_03_v3	970916	976044	Pf3D7_03_v3	PF3D7_0323100	conserved Plasmodium protein, unknown function	0.053152	0.005945	0.041365	-0.010585	-0.021486	-0.030254	-0.007142	-0.019393	0.054667	0.055991	0.006111	0.054667
Pf3D7_03_v3	976620	978445	Pf3D7_03_v3	PF3D7_0323200	conserved Plasmodium protein, unknown function	0.005029	-0.031375	-0.017456	0.027229	0.023408	-0.04148	-0.030992	-0.036827	0.000504	0.127994	-0.055008	0.000504
Pf3D7_03_v3	978720	980488	Pf3D7_03_v3	PF3D7_0323300	conserved protein, unknown function	-0.024884	0.060535	0.067988	0.061479	0.060177	0.018881	0.048338	0.00758	0.076135	-0.086173	0.059494	0.076135
Pf3D7_03_v3	980489	984216	Pf3D7_03_v3	PF3D7_0323400	Rh5 interacting protein	0.121659	0.093402	0.056222	0.07332	0.078737	-0.010982	0.021418	0.059696	0.079672	0.145752	0.030953	0.079672
Pf3D7_03_v3	986015	987860	Pf3D7_03_v3	PF3D7_0323500	survival motor neuron-like protein	0.043946	-0.096683	-0.019441	0.061272	0.058193	0.020663	0.013754	0.005984	0.027648	-0.112499	-0.020222	0.027648
Pf3D7_03_v3	988381	991132	Pf3D7_03_v3	PF3D7_0323600	conserved Plasmodium protein, unknown function	-0.036357	0.040402	0.128557	-0.027257	-0.048457	-0.030149	-0.097963	-0.098062	0.033455	0.053254	0.004381	0.033455
Pf3D7_03_v3	991294	993875	Pf3D7_03_v3	PF3D7_0323700	U4/U6.U5 tri-snRNP-associated protein 1, putative	0.044262	0.016091	0.310293	-0.016855	0.043699	0.060225	-0.07336	-0.059596	0.08999	0.041466	0.114467	0.08999
Pf3D7_03_v3	998399	1001832	Pf3D7_03_v3	PF3D7_0323800	conserved Plasmodium protein, unknown function	0.041633	-0.048998	0.131726	-0.022423	0.043661	-0.019219	-0.058622	0.015621	0.129263	-0.086206	0.027627	0.129263
Pf3D7_03_v3	1002622	1004517	Pf3D7_03_v3	PF3D7_0323900	erythrocyte membrane protein 1 (PfEMP1), exon 2, pseudogene	0.004341	0.015676	0.372561	-0.023371	0.058199	0.073282	0.063934	0.043046	0.086978	0.108868	0.071812	0.086978
Pf3D7_03_v3	1018624	1020223	Pf3D7_03_v3	PF3D7_0324500	rifin	0.000271	0.006405	0.153064	-1e-06	-0.013126	-0.047647	-0.102596	-0.073655	0.133038	0.148068	0.151012	0.133038
Pf3D7_03_v3	1023780	1025661	Pf3D7_03_v3	PF3D7_0324700	erythrocyte membrane protein 1 (PfEMP1), exon 2, pseudogene	0.028752	-0.032315	0.081349	-0.011698	-0.058096	-0.089083	-0.150258	-0.015655	0.168938	0.092856	0.132374	0.168938
Pf3D7_03_v3	1027321	1029179	Pf3D7_03_v3	PF3D7_0324800	rifin	0.040204	-0.104825	0.081856	-0.037414	-0.103196	-0.144714	-0.161856	-0.059851	0.281262	0.093489	0.208426	0.281262
Pf3D7_03_v3	1030572	1038504	Pf3D7_03_v3	PF3D7_0324900	erythrocyte membrane protein 1, PfEMP1	-0.205608	-0.158203	0.091251	-0.157819	-0.21392	-0.172668	-0.070554	-0.172192	0.071917	0.00137	-0.002005	0.071917
Pf3D7_04_v3	28456	37927	Pf3D7_04_v3	PF3D7_0400100	erythrocyte membrane protein 1, PfEMP1	-0.017906	-0.054787	0.18381	-0.041729	-0.035421	-0.005293	-0.030721	-0.057199	0.225544	0.105423	0.1371	0.225544
Pf3D7_04_v3	38705	40404	Pf3D7_04_v3	PF3D7_0400200	erythrocyte membrane protein 1 (PfEMP1), exon 2, pseudogene	0.036924	-0.017259	0.05553	-0.065575	-0.034637	-0.049476	-0.069692	-0.043926	0.183873	0.170476	0.139266	0.183873
Pf3D7_04_v3	41782	43624	Pf3D7_04_v3	PF3D7_0400300	rifin	-0.032672	-0.01616	0.192167	-0.098023	0.025445	-0.10754	-0.024671	-0.061805	0.135232	0.072589	0.059298	0.135232
Pf3D7_04_v3	45305	57110	Pf3D7_04_v3	PF3D7_0400400	erythrocyte membrane protein 1, PfEMP1	-0.045515	0.000324	0.271135	-0.028596	-0.009393	-0.025928	0.030569	-0.068468	0.160384	0.152323	0.16455	0.160384
Pf3D7_04_v3	59386	61175	Pf3D7_04_v3	PF3D7_0400500	rifin	-0.138615	-0.004126	0.230819	-0.092838	-0.059083	-0.058037	-0.006827	-0.06434	0.134667	0.142867	0.065747	0.134667
Pf3D7_04_v3	69711	71363	Pf3D7_04_v3	PF3D7_0400900	rifin	-0.036342	-0.107959	0.094033	-0.062105	-0.063469	-0.138601	-0.07411	-0.091624	0.035245	0.002653	0.016074	0.035245
Pf3D7_04_v3	73018	74590	Pf3D7_04_v3	PF3D7_0401000	rifin	0.064443	0.039419	0.153434	-0.00731	-0.034492	0.007341	0.026179	-0.044064	0.170748	0.064447	0.127287	0.170748
Pf3D7_04_v3	78943	80701	Pf3D7_04_v3	PF3D7_0401200	rifin	0.022732	-0.028476	0.17949	0.016666	0.024121	-0.016571	0.000429	-0.041923	0.157078	0.126035	0.140735	0.157078
Pf3D7_04_v3	81997	83825	Pf3D7_04_v3	PF3D7_0401300	rifin	-0.004134	-0.069641	0.313135	0.005664	0.001109	-0.011656	-0.016746	-0.048921	0.093367	-0.066094	0.081501	0.093367
Pf3D7_04_v3	85147	86858	Pf3D7_04_v3	PF3D7_0401400	rifin	0.022597	-0.018494	0.165939	-0.030656	0.007272	-0.014952	-0.028867	-0.020185	0.068538	0.053199	-0.00825	0.068538
Pf3D7_04_v3	88903	90434	Pf3D7_04_v3	PF3D7_0401500	stevor, pseudogene	-0.034444	-0.025509	0.016396	-0.142239	-0.024719	0.005069	0.045704	-0.04086	0.012556	0.085744	0.031317	0.012556
Pf3D7_04_v3	92326	94059	Pf3D7_04_v3	PF3D7_0401600	rifin	-0.013595	-0.030611	0.02127	-0.070084	-0.079208	-0.086258	-0.062481	-0.045985	-0.049903	-0.022601	-0.13366	-0.049903
Pf3D7_04_v3	100434	102360	Pf3D7_04_v3	PF3D7_0401700	Plasmodium exported protein, unknown function, pseudogene	-0.048688	-0.031858	0.032516	-0.093824	0.000855	-0.003899	-0.060755	-0.038799	0.082853	0.093212	0.036154	0.082853
Pf3D7_04_v3	103492	105853	Pf3D7_04_v3	PF3D7_0401800	Plasmodium exported protein (PHISTb), unknown function	0.165678	0.190241	0.179691	0.147236	0.213124	0.161331	0.147204	0.150285	0.401786	0.224334	0.334502	0.401786
Pf3D7_04_v3	108130	111545	Pf3D7_04_v3	PF3D7_0401900	acyl-CoA synthetase	0.02053	-0.028882	-0.065428	-0.108434	0.031963	-0.05983	-0.051226	-0.041754	-0.003168	0.07032	-0.040411	-0.003168
Pf3D7_04_v3	114351	116308	Pf3D7_04_v3	PF3D7_0402000	Plasmodium exported protein (PHISTa), unknown function	-0.100309	-0.030674	0.048533	-0.049689	-0.018387	-0.014436	-0.060455	-0.023923	0.041751	0.057192	-0.015189	0.041751
Pf3D7_04_v3	123338	125714	Pf3D7_04_v3	PF3D7_0402100	Plasmodium exported protein (PHISTb), unknown function	-0.049809	-0.041352	-0.059744	-0.13714	-0.070464	-0.151438	-0.020359	-0.049569	-0.175468	-0.069554	-0.096983	-0.175468
Pf3D7_04_v3	127462	134718	Pf3D7_04_v3	PF3D7_0402200	surface-associated interspersed protein 4.1 (SURFIN 4.1), pseudogene	-0.021523	-0.045985	0.036449	-0.027106	0.005836	0.014655	-0.015126	-0.005577	0.058543	-0.001908	0.058077	0.058543
Pf3D7_04_v3	137390	146903	Pf3D7_04_v3	PF3D7_0402300	reticulocyte binding protein homologue 1	0.023095	-0.051263	-0.005625	-0.024649	-0.022868	-0.007693	0.04827	0.071259	-0.001158	0.008665	0.0125	-0.001158
Pf3D7_04_v3	147240	148630	Pf3D7_04_v3	PF3D7_0402400	Plasmodium exported protein, unknown function	-0.044504	-0.068619	-0.013581	-0.089299	-0.004698	-0.000327	-0.030269	0.028462	-0.159584	-0.314465	0.021015	-0.159584
Pf3D7_04_v3	155627	157234	Pf3D7_04_v3	PF3D7_0402500	rifin, pseudogene	0.056088	-0.094567	0.058507	-0.03273	0.007635	-0.017817	-0.027957	-0.017168	0.027867	0.02597	0.055118	0.027867
Pf3D7_04_v3	159029	160564	Pf3D7_04_v3	PF3D7_0402600	stevor	0.077676	0.005411	0.08712	-0.050578	-0.021891	0.009522	-0.006176	0.010709	0.002652	-0.034502	-0.060629	0.002652
Pf3D7_04_v3	162261	163974	Pf3D7_04_v3	PF3D7_0402700	rifin, pseudogene	-0.067137	-0.008945	0.054908	-0.047871	-0.073918	-0.013559	0.021185	-0.046698	0.072174	0.090286	0.075987	0.072174
Pf3D7_04_v3	166743	172204	Pf3D7_04_v3	PF3D7_0402800	erythrocyte membrane protein 1 (PfEMP1), pseudogene	0.025119	0.037177	0.103189	0.03318	0.044183	0.038342	-0.033791	0.051628	0.130956	0.088916	0.130417	0.130956
Pf3D7_04_v3	175138	177502	Pf3D7_04_v3	PF3D7_0403100	regulator of chromosome condensation, putative	0.022874	-0.010319	-0.000421	-0.104277	-0.089787	-0.104215	-0.01614	-0.016296	-0.042577	-0.042866	-0.031988	-0.042577
Pf3D7_04_v3	178268	180315	Pf3D7_04_v3	PF3D7_0403200	pre-mRNA splicing factor, putative	0.014917	0.025737	-0.053826	-0.052806	0.010765	-0.022385	0.034379	0.076249	-0.02171	-0.000448	-0.030939	-0.02171
Pf3D7_04_v3	182620	194962	Pf3D7_04_v3	PF3D7_0403400	conserved Plasmodium protein, unknown function	0.031321	-0.055587	-0.016441	0.010737	-0.00717	-0.028142	-0.022611	-0.013992	0.02577	-0.010814	0.031641	0.02577
Pf3D7_04_v3	195293	196995	Pf3D7_04_v3	PF3D7_0403500	ubiquitin specific protease, putative	-0.024213	0.053921	0.023671	0.004574	0.037288	-0.114078	0.004744	0.021347	0.02953	-0.072419	0.080167	0.02953
Pf3D7_04_v3	197596	201458	Pf3D7_04_v3	PF3D7_0403600	conserved Plasmodium protein, unknown function	0.008247	0.006782	-0.011669	-0.024972	-0.002837	-0.016994	-0.017647	0.02914	-0.016429	-0.0023	0.005199	-0.016429
Pf3D7_04_v3	205978	209644	Pf3D7_04_v3	PF3D7_0403700	pre-mRNA-splicing factor CLF1, putative	-0.05197	0.015457	-0.010117	-0.040791	-0.005874	0.000955	0.049494	0.016505	0.036324	0.148583	0.032101	0.036324
Pf3D7_04_v3	211400	214104	Pf3D7_04_v3	PF3D7_0403800	alpha/beta hydrolase, putative	0.054744	0.003468	-0.038676	0.022597	0.004355	-0.006995	0.026174	0.034159	0.004397	0.035722	-0.005623	0.004397
Pf3D7_04_v3	218837	223088	Pf3D7_04_v3	PF3D7_0403900	SET domain protein, putative	-0.018171	-0.002591	-0.001971	-0.029226	-0.017543	-0.002141	-0.043878	-0.042789	-0.0329	-0.026129	-0.034265	-0.0329
Pf3D7_04_v3	223461	224381	Pf3D7_04_v3	PF3D7_0404000	conserved Plasmodium protein, unknown function	0.143227	0.136116	0.049207	0.086357	0.092151	0.109292	0.139024	-0.005288	0.029729	0.222725	0.14673	0.029729
Pf3D7_04_v3	224529	231983	Pf3D7_04_v3	PF3D7_0404100	AP2 domain transcription factor AP2-SP2, putative	0.021845	-0.015511	0.004864	0.03848	-0.075005	0.014884	-0.037444	0.030254	0.031708	-0.172141	0.025126	0.031708
Pf3D7_04_v3	232345	233499	Pf3D7_04_v3	PF3D7_0404200	conserved Plasmodium protein, unknown function	-0.093339	-0.090976	-0.033473	-0.100245	-0.124148	-0.050541	-0.01008	-0.04799	-0.158881	-0.103646	-0.158496	-0.158881
Pf3D7_04_v3	233764	237263	Pf3D7_04_v3	PF3D7_0404300	conserved Plasmodium protein, unknown function	0.160116	0.143343	0.045351	0.095304	0.060964	0.043421	-0.01121	0.098388	0.090124	0.108115	0.094778	0.090124
Pf3D7_04_v3	238110	239749	Pf3D7_04_v3	PF3D7_0404400	6-cysteine protein P36	0.029516	0.021883	0.046811	-0.056121	-0.007786	-0.05649	-0.036713	-0.026199	-0.008313	0.048196	0.015843	-0.008313
Pf3D7_04_v3	240661	242597	Pf3D7_04_v3	PF3D7_0404500	6-cysteine protein P52	0.015739	0.006828	0.046062	-0.004093	0.064168	0.024383	-0.040563	0.054622	-0.00533	0.104637	0.076683	-0.00533
Pf3D7_04_v3	247481	260300	Pf3D7_04_v3	PF3D7_0404600	conserved Plasmodium membrane protein, unknown function	0.069324	-0.01553	-0.001048	0.025018	0.039713	0.027939	-0.00888	0.034221	0.0403	-0.045443	0.028708	0.0403
Pf3D7_04_v3	260301	263668	Pf3D7_04_v3	PF3D7_0404700	dipeptidyl aminopeptidase 3	-0.03338	0.036927	0.018587	-0.048268	-0.002888	-0.010727	0.010815	-0.005346	-0.042863	-0.057853	-0.017581	-0.042863
Pf3D7_04_v3	264055	266420	Pf3D7_04_v3	PF3D7_0404800	conserved Plasmodium protein, unknown function	0.058151	0.081146	0.011026	0.002627	-0.042053	-0.013262	-0.022124	-0.001178	0.101924	0.066818	0.034125	0.101924
Pf3D7_04_v3	266994	268630	Pf3D7_04_v3	PF3D7_0404900	6-cysteine protein P41	0.00863	-0.025674	0.003359	0.000131	-0.012721	-0.002574	0.013019	-0.001084	0.066927	0.071683	-0.01929	0.066927
Pf3D7_04_v3	268710	271384	Pf3D7_04_v3	PF3D7_0405000	ATP-dependent RNA helicase DDX51, putative	0.065667	-0.017903	0.081949	0.03718	0.027583	0.039095	-0.074529	0.021159	0.039493	-0.043715	-0.029052	0.039493
Pf3D7_04_v3	272005	277074	Pf3D7_04_v3	PF3D7_0405100	protein transport protein Sec24B, putative	-0.023216	-0.004918	0.029956	0.006603	0.005832	-0.011346	-0.011215	-0.01869	0.001862	0.095745	-0.021795	0.001862
Pf3D7_04_v3	278822	282193	Pf3D7_04_v3	PF3D7_0405200	ag-1 blood stage membrane protein homologue	0.027823	0.016531	0.024653	-0.023876	0.056154	0.035756	-0.03011	0.001468	0.022347	0.129056	0.021449	0.022347
Pf3D7_04_v3	282194	288547	Pf3D7_04_v3	PF3D7_0405300	liver specific protein 2, putative	0.020528	0.055263	0.05154	0.030631	0.01701	-0.002394	0.022725	0.011025	0.048308	0.101159	0.023227	0.048308
Pf3D7_04_v3	291001	301117	Pf3D7_04_v3	PF3D7_0405400	pre-mRNA-processing-splicing factor 8, putative	-0.02701	0.006577	0.024568	0.01287	-0.031782	0.0063	-0.020907	-0.015444	0.052261	0.055168	0.016872	0.052261
Pf3D7_04_v3	301118	302517	Pf3D7_04_v3	PF3D7_0405500	conserved Plasmodium protein, unknown function	0.089809	0.067757	0.061125	0.025385	0.091463	-0.048104	-0.011552	-0.049446	0.070146	0.105637	0.038101	0.070146
Pf3D7_04_v3	303079	305544	Pf3D7_04_v3	PF3D7_0405600	TMEM33 domain-containing protein, putative	-0.006542	0.01876	0.031981	0.018498	-0.010294	-0.014238	0.067347	0.066274	-0.033957	0.035549	-0.010969	-0.033957
Pf3D7_04_v3	305545	313243	Pf3D7_04_v3	PF3D7_0405700	lysine decarboxylase, putative	-0.013706	-0.001745	0.001742	-0.022525	-0.000304	0.020103	0.042791	0.005615	-0.045326	-0.029328	-0.029482	-0.045326
Pf3D7_04_v3	316290	319428	Pf3D7_04_v3	PF3D7_0405900	apical sushi protein	0.057904	0.09546	0.053384	0.039785	0.019044	0.016397	0.084637	0.086343	0.068897	0.151913	0.060094	0.068897
Pf3D7_04_v3	320769	322795	Pf3D7_04_v3	PF3D7_0406000	conserved protein, unknown function	-0.055424	0.005835	0.010026	-0.055337	-0.026673	0.040427	0.051018	-0.005233	-0.023719	-0.010191	-0.036137	-0.023719
Pf3D7_04_v3	323017	325475	Pf3D7_04_v3	PF3D7_0406100	V-type proton ATPase subunit B	-0.010648	0.057925	0.114202	0.033036	0.06566	0.055613	0.115509	0.104201	0.048031	0.029763	0.107415	0.048031
Pf3D7_04_v3	328966	329939	Pf3D7_04_v3	PF3D7_0406200	sexual stage-specific protein precursor	-0.007861	0.006035	0.036641	-0.038065	0.011125	-0.026989	-0.00653	0.059092	-0.018877	-0.115651	-0.021705	-0.018877
Pf3D7_04_v3	331793	334069	Pf3D7_04_v3	PF3D7_0406400	cytosolic glyoxalase II	-0.058303	-0.062977	-0.02256	-0.019494	-0.067302	-0.041263	-0.052158	-0.006756	-0.05293	0.002913	-0.009121	-0.05293
Pf3D7_04_v3	334070	344304	Pf3D7_04_v3	PF3D7_0406500	NYN domain-containing protein, putative	0.024255	0.032433	-0.000995	0.021188	0.022165	0.021137	0.041605	0.064183	0.05123	0.08776	0.073685	0.05123
Pf3D7_04_v3	347208	351513	Pf3D7_04_v3	PF3D7_0406700	conserved Plasmodium protein, unknown function	-0.008791	-0.021784	-0.073416	0.007055	-0.029955	-0.000746	-0.000369	0.010054	-0.016131	-0.028548	-0.035349	-0.016131
Pf3D7_04_v3	351514	353233	Pf3D7_04_v3	PF3D7_0406800	ribosomal protein L25, putative	0.046292	-0.058778	0.006498	0.039276	0.022741	0.008446	0.010882	0.059357	-0.016364	0.039073	0.016555	-0.016364
Pf3D7_04_v3	353405	360128	Pf3D7_04_v3	PF3D7_0406900	conserved Plasmodium protein, unknown function	-0.027831	0.003009	-0.024795	-0.015265	-0.027963	-0.033665	-0.015243	0.014874	-0.028901	-0.010439	-0.026318	-0.028901
Pf3D7_04_v3	360297	362014	Pf3D7_04_v3	PF3D7_0407000	conserved Plasmodium protein, unknown function	0.035846	-0.134428	-0.136196	-0.069623	-0.066489	-0.20353	-0.01905	-0.107295	-0.13435	-0.083168	-0.104312	-0.13435
Pf3D7_04_v3	362051	363520	Pf3D7_04_v3	PF3D7_0407100	methyltransferase, putative	-0.148406	-0.059747	0.07751	-0.091985	-0.009278	-0.085493	0.040324	-0.050917	-0.030587	-0.040842	-0.005049	-0.030587
Pf3D7_04_v3	363521	365183	Pf3D7_04_v3	PF3D7_0407200	peptidyl-tRNA hydrolase 2, putative	-0.033737	0.026602	0.108304	0.113257	0.028092	0.092403	0.1174	0.059577	0.172468	0.036355	0.034914	0.172468
Pf3D7_04_v3	366129	367591	Pf3D7_04_v3	PF3D7_0407300	transcription factor, putative	0.049452	0.08741	-0.012366	0.051492	-0.009407	0.008884	-0.021189	0.069115	0.03272	-0.013176	-0.012816	0.03272
Pf3D7_04_v3	369635	371520	Pf3D7_04_v3	PF3D7_0407500	mitochondrial carrier protein, putative	0.027677	-0.039514	0.077989	0.062022	0.053107	0.175542	0.036388	0.020309	0.059989	-0.056008	0.008755	0.059989
Pf3D7_04_v3	372789	376927	Pf3D7_04_v3	PF3D7_0407600	conserved Plasmodium protein, unknown function	0.072423	0.034672	0.078997	0.114194	0.01805	0.053667	0.062817	0.052935	0.037588	-0.0308	0.017697	0.037588
Pf3D7_04_v3	377231	383337	Pf3D7_04_v3	PF3D7_0407700	conserved Plasmodium protein, unknown function	0.007804	0.032403	-0.002249	0.049307	-0.025819	-0.049501	0.032643	0.016676	-0.006063	0.037394	-0.02441	-0.006063
Pf3D7_04_v3	384674	391056	Pf3D7_04_v3	PF3D7_0407800	conserved Plasmodium protein, unknown function	-0.014306	-0.011162	-0.02408	-0.065499	-0.062049	-0.059386	0.002758	-0.012419	0.009109	0.024742	-0.004849	0.009109
Pf3D7_04_v3	391097	393600	Pf3D7_04_v3	PF3D7_0407900	AAA family ATPase, putative	-0.014319	-0.045532	0.000347	-0.038176	-0.030792	-0.018177	0.036153	0.009816	-0.070271	-0.053709	-0.009677	-0.070271
Pf3D7_04_v3	397078	400943	Pf3D7_04_v3	PF3D7_0408100	conserved Plasmodium protein, unknown function	0.03893	0.016749	0.06297	0.060884	0.028844	0.045673	0.02879	0.070231	0.030853	0.037964	0.043819	0.030853
Pf3D7_04_v3	401216	403480	Pf3D7_04_v3	PF3D7_0408200	conserved Plasmodium protein, unknown function	0.018162	-0.00228	-0.010701	0.013118	-0.070929	0.009956	-0.026295	0.003321	0.013429	0.010509	-0.023331	0.013429
Pf3D7_04_v3	403481	405616	Pf3D7_04_v3	PF3D7_0408300	zinc finger Ran-binding domain-containing protein 2, putative	-0.017303	-0.002384	0.031443	-0.062487	-0.01256	-0.045655	0.046439	-0.050855	0.044477	0.070517	0.032475	0.044477
Pf3D7_04_v3	405983	408159	Pf3D7_04_v3	PF3D7_0408400	conserved protein, unknown function	0.036687	-0.012081	-0.01822	0.002041	0.01645	0.02883	0.067149	0.040726	0.066524	-0.070768	0.035542	0.066524
Pf3D7_04_v3	408429	410947	Pf3D7_04_v3	PF3D7_0408500	flap endonuclease 1	0.024479	0.013597	0.051695	-0.012314	-0.005414	0.035381	-0.00565	0.029583	0.036516	0.061973	0.033308	0.036516
Pf3D7_04_v3	413153	416607	Pf3D7_04_v3	PF3D7_0408600	sporozoite invasion-associated protein 1	0.039556	0.022645	0.075657	0.013816	0.009858	-0.006439	0.039218	-0.013479	0.063921	0.096869	0.069557	0.063921
Pf3D7_04_v3	417122	421074	Pf3D7_04_v3	PF3D7_0408700	perforin-like protein 1	-0.041426	-0.0633	-0.032206	-0.055598	-0.073426	-0.069659	0.002809	-0.009666	0.019876	0.021452	0.023045	0.019876
Pf3D7_04_v3	421761	423208	Pf3D7_04_v3	PF3D7_0408800	conserved Plasmodium protein, unknown function	0.039405	0.033561	0.00514	-0.002204	-0.059084	0.066835	0.013114	-0.015672	0.021704	0.032564	0.031897	0.021704
Pf3D7_04_v3	424050	427429	Pf3D7_04_v3	PF3D7_0408900	tRNA N6-adenosine threonylcarbamoyltransferase	-0.023932	0.003654	0.055046	0.007554	-0.015048	-0.008017	0.079373	-0.005313	0.071379	0.055964	0.057209	0.071379
Pf3D7_04_v3	427430	435617	Pf3D7_04_v3	PF3D7_0409000	conserved Plasmodium protein, unknown function	0.019404	-0.026638	-0.024581	-0.020371	-0.015144	0.04195	0.003795	-0.005923	0.005634	-0.051464	0.023885	0.005634
Pf3D7_04_v3	435967	438231	Pf3D7_04_v3	PF3D7_0409100	U4/U6 small nuclear ribonucleoprotein PRP31, putative	0.001534	-0.006235	0.011749	-0.011618	-0.053196	-0.001839	-0.014665	-0.021656	0.054998	0.076346	0.034962	0.054998
Pf3D7_04_v3	438637	440585	Pf3D7_04_v3	PF3D7_0409200	protein SOF1, putative	0.042138	0.008594	0.043967	0.068492	-0.003363	0.063959	0.007824	-0.062398	0.051159	0.060742	0.021614	0.051159
Pf3D7_04_v3	440718	444492	Pf3D7_04_v3	PF3D7_0409300	methyltransferase, putative	0.001081	-0.011174	-0.068783	-0.071893	-0.041129	0.008979	-0.054932	0.003091	0.065976	0.050483	-0.059199	0.065976
Pf3D7_04_v3	445750	448268	Pf3D7_04_v3	PF3D7_0409400	chaperone protein DnaJ	-0.046595	-0.039967	0.029368	-0.029363	-0.055209	-0.038978	-0.02473	-0.023235	0.007415	0.007705	-0.033985	0.007415
Pf3D7_04_v3	448939	450883	Pf3D7_04_v3	PF3D7_0409500	NAD(P)-binding protein, putative	-0.03419	-0.050827	-0.062983	-0.003552	-0.072224	-0.099113	-0.040708	-0.001244	-0.025697	-0.115534	-0.09195	-0.025697
Pf3D7_04_v3	451884	455821	Pf3D7_04_v3	PF3D7_0409600	replication protein A1, large subunit	-0.064439	-0.069286	-0.133797	-0.068613	-0.038822	-0.04731	0.049677	0.005103	-0.062409	-0.026698	-0.131652	-0.062409
Pf3D7_04_v3	456672	458270	Pf3D7_04_v3	PF3D7_0409700	peptide chain release factor 2	-0.045659	-0.042647	-0.006824	-0.036496	-0.013115	-0.056015	0.02379	0.057309	-0.017295	-0.054459	-0.023115	-0.017295
Pf3D7_04_v3	459460	461687	Pf3D7_04_v3	PF3D7_0409800	zinc finger protein, putative	-0.042757	-0.019605	-0.064545	-0.173861	-0.004594	-0.084475	-0.025907	-0.013019	-0.085641	-0.05851	-0.152142	-0.085641
Pf3D7_04_v3	461741	464207	Pf3D7_04_v3	PF3D7_0409900	actin-like protein, putative	-0.088932	-0.042958	0.001807	-0.10957	-0.039819	-0.034069	0.032716	-0.039202	-0.028165	0.039287	-0.050597	-0.028165
Pf3D7_04_v3	464482	467589	Pf3D7_04_v3	PF3D7_0410000	erythrocyte vesicle protein 1	-0.098529	-0.071203	-0.017648	-0.126522	-0.084688	0.036838	-0.008706	-0.010476	-0.012428	-0.058776	-0.050096	-0.012428
Pf3D7_04_v3	470278	473846	Pf3D7_04_v3	PF3D7_0410300	protein phosphatase PPM1, putative	-0.120214	-0.059081	-0.073294	-0.085702	0.005412	-0.117686	-0.040414	-0.04833	-0.04821	-0.068992	-0.06736	-0.04821
Pf3D7_04_v3	474292	475751	Pf3D7_04_v3	PF3D7_0410400	exosome complex component RRP4	-0.011014	-0.033257	-0.0373	-0.026128	0.012459	-0.028907	0.007029	-0.022167	-0.036412	-0.100246	-0.108486	-0.036412
Pf3D7_04_v3	475752	476835	Pf3D7_04_v3	PF3D7_0410500	conserved Plasmodium protein, unknown function	0.031225	-0.000811	-0.036282	-0.07082	0.074601	0.030257	-0.078303	0.039352	-0.068753	0.060456	0.120824	-0.068753
Pf3D7_04_v3	478778	480718	Pf3D7_04_v3	PF3D7_0410600	conserved protein, unknown function	0.025481	-0.005755	-0.041654	-0.056041	-0.068688	-0.074862	-0.104838	-0.059698	-0.014668	0.01967	-0.009448	-0.014668
Pf3D7_04_v3	480927	484141	Pf3D7_04_v3	PF3D7_0410700	ribosome biogenesis GTPase A, putative	-0.082481	0.009957	-0.101358	-0.117223	-0.059414	-0.069137	-0.061122	0.008684	-0.12524	-0.040979	-0.025994	-0.12524
Pf3D7_04_v3	485582	489978	Pf3D7_04_v3	PF3D7_0410800	conserved Plasmodium protein, unknown function	-0.076781	-0.045054	-0.114175	-0.093551	-0.050061	-0.020707	0.001414	-0.021816	-0.119016	-0.15047	-0.114111	-0.119016
Pf3D7_04_v3	490192	493625	Pf3D7_04_v3	PF3D7_0410900	conserved Plasmodium protein, unknown function	-0.02494	0.002808	-0.059016	-0.053792	-0.070215	0.030752	-0.013081	0.02134	-0.010853	-0.083958	-0.016944	-0.010853
Pf3D7_04_v3	498918	504130	Pf3D7_04_v3	PF3D7_0411000	conserved Plasmodium protein, unknown function	-0.041563	-0.049618	-0.03143	-0.080755	-0.033905	-0.022264	0.00389	0.030014	-0.053619	-0.041473	-0.064213	-0.053619
Pf3D7_04_v3	504228	505345	Pf3D7_04_v3	PF3D7_0411100	mediator of RNA polymerase II transcription subunit 8, putative	-0.047433	-0.011086	-0.046706	-0.030466	-0.057259	-0.040946	-0.151841	-0.012319	-0.024032	-0.141811	-0.073842	-0.024032
Pf3D7_04_v3	505683	509920	Pf3D7_04_v3	PF3D7_0411200	PP-loop family protein, putative	-0.022315	0.022147	-0.015838	-0.028255	0.003316	0.013376	-0.005803	0.024422	0.024354	-0.014263	0.01851	0.024354
Pf3D7_04_v3	510130	512798	Pf3D7_04_v3	PF3D7_0411300	conserved Plasmodium protein, unknown function	-0.084524	-0.083172	-0.020684	-0.084254	-0.065602	-0.084195	-0.062877	-0.08311	-0.041503	-0.010038	0.000461	-0.041503
Pf3D7_04_v3	512904	517318	Pf3D7_04_v3	PF3D7_0411400	DEAD box ATP-dependent RNA helicase, putative	0.032189	0.02627	0.058153	0.043756	0.094226	-0.004478	0.093191	0.055192	0.106153	0.046355	0.06347	0.106153
Pf3D7_04_v3	519582	525868	Pf3D7_04_v3	PF3D7_0411800	conserved Plasmodium protein, unknown function	0.018693	-0.001481	-0.033014	9.5e-05	-0.013523	0.018089	0.017616	0.017727	0.028152	-0.003793	0.038	0.028152
Pf3D7_04_v3	527942	534735	Pf3D7_04_v3	PF3D7_0411900	DNA polymerase alpha catalytic subunit A	-0.034583	-0.015749	0.008192	0.001727	-0.011006	-0.06048	0.022006	-0.002116	0.039476	0.066377	0.046391	0.039476
Pf3D7_04_v3	536524	539360	Pf3D7_04_v3	PF3D7_0412000	LITAF-like zinc finger protein, putative	-0.060591	-0.024196	-0.041841	-0.097549	-0.061339	-0.07649	0.031613	-0.006638	-0.08889	0.005569	-0.020254	-0.08889
Pf3D7_04_v3	539938	541448	Pf3D7_04_v3	PF3D7_0412100	30S ribosomal protein S12, mitochondrial, putative	-0.029602	-0.09521	0.014488	-0.051608	-0.087638	-0.04159	-0.033361	-0.074093	-0.083474	-0.090453	-0.085894	-0.083474
Pf3D7_04_v3	541561	543059	Pf3D7_04_v3	PF3D7_0412200	conserved Plasmodium protein, unknown function	-0.11473	-0.1336	-0.057888	-0.054298	-0.148571	-0.043683	-0.024868	-0.057286	-0.057612	-0.028283	0.009198	-0.057612
Pf3D7_04_v3	543375	545497	Pf3D7_04_v3	PF3D7_0412300	phosphopantothenoylcysteine synthetase, putative	-0.023387	0.004847	-0.06257	-0.006108	-0.03966	0.011173	-0.046184	-0.017489	-0.004655	0.125132	0.089476	-0.004655
Pf3D7_04_v3	545737	554060	Pf3D7_04_v3	PF3D7_0412400	erythrocyte membrane protein 1, PfEMP1	-0.012396	0.06263	0.282828	0.062055	0.036321	0.068619	0.038262	0.025611	0.260295	0.242406	0.257854	0.260295
Pf3D7_04_v3	559137	560888	Pf3D7_04_v3	PF3D7_0412600	rifin, pseudogene	-0.002993	0.061961	0.112983	0.028653	0.064589	0.139758	0.050137	0.095469	0.281362	0.363951	0.269064	0.281362
Pf3D7_04_v3	561417	569592	Pf3D7_04_v3	PF3D7_0412700	erythrocyte membrane protein 1, PfEMP1	0.066282	0.102194	0.221053	0.081527	0.080349	0.118476	0.077268	0.130815	0.319331	0.244938	0.297213	0.319331
Pf3D7_04_v3	591699	600099	Pf3D7_04_v3	PF3D7_0413100	erythrocyte membrane protein 1, PfEMP1	0.04355	0.185415	0.394305	0.198035	0.08168	0.224905	0.121481	0.117894	0.348475	0.327179	0.312735	0.348475
Pf3D7_04_v3	602916	604706	Pf3D7_04_v3	PF3D7_0413200	rifin	0.04414	0.008182	0.244966	0.030752	-0.008636	0.099664	-0.019432	0.043592	0.06455	0.07353	0.108126	0.06455
Pf3D7_04_v3	608905	610683	Pf3D7_04_v3	PF3D7_0413300	rifin	0.098091	0.036363	0.113883	0.041842	0.078964	0.045553	0.064982	0.076861	0.055878	-0.100206	0.082956	0.055878
Pf3D7_04_v3	612548	614319	Pf3D7_04_v3	PF3D7_0413400	erythrocyte membrane protein 1 (PfEMP1), exon 1, pseudogene	-0.010774	-0.022615	-0.026249	-0.026034	-0.048892	-0.06318	0.043054	-0.034886	0.017374	0.041211	0.029675	0.017374
Pf3D7_04_v3	615106	616493	Pf3D7_04_v3	PF3D7_0413500	phosphoglucomutase-2	-0.051232	-0.029176	0.028634	0.064043	-0.047089	0.060301	-0.014896	-0.005358	-0.033554	0.051361	0.052635	-0.033554
Pf3D7_04_v3	616664	618600	Pf3D7_04_v3	PF3D7_0413600	26S protease regulatory subunit 6B, putative	-0.099886	0.001402	-0.035662	0.033002	-0.017234	0.046319	0.062058	-0.052083	0.031735	0.024564	0.023483	0.031735
Pf3D7_04_v3	619536	621052	Pf3D7_04_v3	PF3D7_0413700	lysine decarboxylase-like protein, putative	-0.10131	-0.025267	-0.196623	-0.025786	-0.144909	-0.040326	-0.017102	-0.133672	-0.1069	0.121713	-0.061918	-0.1069
Pf3D7_04_v3	621844	623052	Pf3D7_04_v3	PF3D7_0413800	50S ribosomal protein L10, putative	-0.066412	-0.070808	0.003243	0.028779	-0.057226	-0.135067	-0.033567	-0.073588	-0.0712	-0.201573	-0.123807	-0.0712
Pf3D7_04_v3	623053	626476	Pf3D7_04_v3	PF3D7_0413900	ubiquitin carboxyl-terminal hydrolase 13, putative	-0.07234	-0.026488	-0.010589	0.055201	-0.050678	-0.015044	-0.032808	-0.0469	-0.084816	-0.048192	-0.018673	-0.084816
Pf3D7_04_v3	626641	633376	Pf3D7_04_v3	PF3D7_0414000	structural maintenance of chromosomes protein 3, putative	-0.072288	0.017276	-0.044361	-0.007844	-0.065857	0.0027	-0.006373	-0.055111	-0.083466	-0.056319	-0.09984	-0.083466
Pf3D7_04_v3	633779	639155	Pf3D7_04_v3	PF3D7_0414100	conserved Plasmodium membrane protein, unknown function	0.016494	0.023403	-0.011396	0.063166	0.041322	0.072777	0.030175	0.003935	0.015537	-0.113878	-0.000376	0.015537
Pf3D7_04_v3	647139	648638	Pf3D7_04_v3	PF3D7_0414200	calmodulin-like protein	0.008741	0.01057	-0.105088	0.082468	0.019043	0.092943	-0.034154	-0.01084	-0.02828	-0.198919	-0.034695	-0.02828
Pf3D7_04_v3	652100	653804	Pf3D7_04_v3	PF3D7_0414400	conserved Plasmodium protein, unknown function	0.080627	0.064083	-0.008209	0.049085	0.062916	0.104924	0.021455	0.020474	-0.067416	0.08814	-0.034471	-0.067416
Pf3D7_04_v3	654775	657564	Pf3D7_04_v3	PF3D7_0414500	RNA-binding protein, putative	-0.009334	0.031694	-0.016051	0.012123	-0.05032	0.006327	-0.039168	0.009004	-0.035737	0.178366	-0.096625	-0.035737
Pf3D7_04_v3	658370	659788	Pf3D7_04_v3	PF3D7_0414600	acylated pleckstrin-homology domain-containing protein, putative	0.027464	-0.017071	0.03534	-0.073226	-0.091143	0.051982	-0.001309	-0.082498	-0.046878	-0.037981	-0.048568	-0.046878
Pf3D7_04_v3	660374	662769	Pf3D7_04_v3	PF3D7_0414700	GTP-binding protein, putative	0.016087	-0.038636	-0.024873	0.020805	-0.03787	0.016343	-0.041163	-0.05883	-0.048897	0.061851	-0.100109	-0.048897
Pf3D7_04_v3	663166	664265	Pf3D7_04_v3	PF3D7_0414800	conserved Plasmodium protein, unknown function	-0.010842	-0.018971	-0.10755	0.038183	-0.025108	-0.022409	0.072169	0.017457	-0.054957	0.048296	-0.069533	-0.054957
Pf3D7_04_v3	665723	668362	Pf3D7_04_v3	PF3D7_0414900	armadillo-domain containing rhoptry protein	-0.002222	0.070656	0.048058	0.087913	0.032403	0.182078	0.075952	0.062177	0.069181	0.196785	0.041725	0.069181
Pf3D7_04_v3	668363	669967	Pf3D7_04_v3	PF3D7_0415000	arsenical pump-driving ATPase, putative	-0.157835	-0.205064	-0.145754	-0.05281	-0.093802	-0.081362	-0.06748	-0.082083	-0.20515	-0.122572	-0.076909	-0.20515
Pf3D7_04_v3	670633	672312	Pf3D7_04_v3	PF3D7_0415100	conserved protein, unknown function	-0.067955	-0.076901	0.069811	0.007986	-0.047755	0.028749	-0.0789	-0.018435	0.006863	-0.099064	0.033294	0.006863
Pf3D7_04_v3	672313	679388	Pf3D7_04_v3	PF3D7_0415200	conserved Plasmodium protein, unknown function	0.047767	0.049458	0.012591	0.067736	-0.002446	0.081044	0.062227	0.01746	0.026753	0.030502	0.053963	0.026753
Pf3D7_04_v3	681560	686191	Pf3D7_04_v3	PF3D7_0415300	cdc2-related protein kinase 3	-0.025137	-0.026623	0.035633	0.052742	-0.018814	0.045071	-0.008558	0.002415	0.035824	0.044454	0.019036	0.035824
Pf3D7_04_v3	686192	687290	Pf3D7_04_v3	PF3D7_0415400	coatomer subunit zeta, putative	-0.066197	-0.180246	-0.011029	-0.021067	0.004088	0.072929	0.048033	-0.01957	-0.090298	-0.130283	-0.109454	-0.090298
Pf3D7_04_v3	687942	689303	Pf3D7_04_v3	PF3D7_0415500	nuclear cap-binding protein subunit 2, putative	-0.015597	-0.015562	-0.051986	0.017201	-0.032225	-0.000253	0.012077	0.006284	0.072251	0.095225	-0.015722	0.072251
Pf3D7_04_v3	689390	690579	Pf3D7_04_v3	PF3D7_0415600	GTP:AMP phosphotransferase	0.090586	0.159542	0.100838	0.097734	0.045994	0.156577	0.216585	0.135322	-0.011561	0.199743	0.13482	-0.011561
Pf3D7_04_v3	690881	692766	Pf3D7_04_v3	PF3D7_0415700	conserved Plasmodium protein, unknown function	-0.079524	-0.076161	-0.058979	-0.035372	-0.058875	0.024374	0.021224	-0.037583	-0.039056	-0.037891	-0.066969	-0.039056
Pf3D7_04_v3	693656	696783	Pf3D7_04_v3	PF3D7_0415800	RING zinc finger protein, putative	-0.069406	0.006788	-0.077704	0.020803	-0.034317	0.041556	-0.007373	0.031363	-0.003738	-0.103914	-0.009533	-0.003738
Pf3D7_04_v3	697668	699018	Pf3D7_04_v3	PF3D7_0415900	60S ribosomal protein L15, putative	-0.059991	-0.01284	0.029159	-0.007545	0.016649	-0.017861	-0.049371	-0.007641	-0.020392	-0.037583	-0.0143	-0.020392
Pf3D7_04_v3	701276	704412	Pf3D7_04_v3	PF3D7_0416000	RNA-binding protein, putative	-0.048896	0.029673	0.012389	0.02051	0.043043	0.001297	-0.066676	0.013163	-0.054893	0.008446	-0.088119	-0.054893
Pf3D7_04_v3	706279	709234	Pf3D7_04_v3	PF3D7_0416100	glutamyl-tRNA(Gln) amidotransferase subunit A	-0.07551	-0.057064	-0.029701	-0.058392	-0.039285	-0.045526	0.018841	-0.003019	-0.050284	-0.014172	-0.060729	-0.050284
Pf3D7_04_v3	709235	710333	Pf3D7_04_v3	PF3D7_0416200	conserved protein, unknown function	-0.105481	-0.067357	-0.056866	-0.112791	-0.021762	-0.061632	-0.027029	-0.042977	-0.099544	0.062053	-0.124794	-0.099544
Pf3D7_04_v3	710842	715739	Pf3D7_04_v3	PF3D7_0416300	DNA helicase MCM9, putative	-0.01603	-0.007277	-0.047003	-0.02001	-0.05505	-0.011206	0.016538	0.040667	-0.078213	-0.101678	-0.089011	-0.078213
Pf3D7_04_v3	717952	722863	Pf3D7_04_v3	PF3D7_0416400	histone acetyltransferase, putative	-0.030289	0.007469	0.011553	-0.025708	-0.035374	0.021867	0.022937	-0.01561	0.00571	-0.034588	-0.035825	0.00571
Pf3D7_04_v3	722864	724492	Pf3D7_04_v3	PF3D7_0416500	repressor of RNA polymerase III transcription MAF1	-0.060538	-0.004635	-0.008442	-0.034752	0.058252	0.00479	0.03323	0.063145	0.011257	-0.142088	-0.110618	0.011257
Pf3D7_04_v3	726015	727378	Pf3D7_04_v3	PF3D7_0416600	prohibitin-like protein PHBL, putative	-0.001966	-0.165729	-0.090773	-0.091977	-0.084544	-0.070398	-0.095851	-0.075804	-0.140297	-0.10567	-0.160781	-0.140297
Pf3D7_04_v3	727460	728229	Pf3D7_04_v3	PF3D7_0416700	CDGSH iron-sulfur domain-containing protein, putative	0.015385	0.053408	-0.074958	0.058063	0.013068	-0.012105	0.120435	0.075043	0.110688	0.221267	0.072432	0.110688
Pf3D7_04_v3	729712	731473	Pf3D7_04_v3	PF3D7_0416800	small GTP-binding protein sar1	0.033357	-0.070838	0.047299	0.002407	0.002229	-0.05241	7.3e-05	0.033612	-0.018816	-0.023167	0.018692	-0.018816
Pf3D7_04_v3	732202	740122	Pf3D7_04_v3	PF3D7_0416900	conserved Plasmodium protein, unknown function	0.03663	0.028743	-0.014755	0.034661	0.037764	0.025657	0.063591	0.032615	0.104361	0.079735	0.057779	0.104361
Pf3D7_04_v3	741899	743341	Pf3D7_04_v3	PF3D7_0417000	conserved Plasmodium protein, unknown function	-0.081132	-0.041265	-0.127609	-0.025855	-0.168444	-0.084694	-0.087067	-0.081958	-0.087776	0.025187	-0.065388	-0.087776
Pf3D7_04_v3	743361	745887	Pf3D7_04_v3	PF3D7_0417100	mRNA-binding protein PUF2	0.011209	-0.007931	-0.080705	0.065651	-0.030713	0.044733	0.029149	0.006822	0.046321	-0.006127	0.042993	0.046321
Pf3D7_04_v3	747838	750164	Pf3D7_04_v3	PF3D7_0417200	bifunctional dihydrofolate reductase-thymidylate synthase	-0.024846	-0.034068	-0.030128	0.00706	-0.034717	0.009046	-0.033158	-0.015718	-0.033796	-0.042631	-0.06526	-0.033796
Pf3D7_04_v3	750610	753962	Pf3D7_04_v3	PF3D7_0417300	LETM1-like protein, putative	-0.025959	-0.027153	0.035701	0.015263	0.039875	0.05802	0.046268	0.007366	0.026728	0.05705	0.053128	0.026728
Pf3D7_04_v3	756044	776853	Pf3D7_04_v3	PF3D7_0417400	conserved Plasmodium protein, unknown function	0.035958	-0.023237	-0.016281	0.035853	0.001433	0.024914	0.020576	-0.002231	0.013153	-0.039009	0.020096	0.013153
Pf3D7_04_v3	776950	779674	Pf3D7_04_v3	PF3D7_0417500	memo-like protein	0.068007	0.168013	0.14378	0.191942	0.109783	0.153423	0.097345	0.128638	0.208551	0.155147	0.143114	0.208551
Pf3D7_04_v3	780000	783496	Pf3D7_04_v3	PF3D7_0417600	conserved Plasmodium protein, unknown function	0.024107	0.030996	0.029008	0.038607	0.035834	0.061848	0.076832	0.081614	0.008611	-0.019573	0.011833	0.008611
Pf3D7_04_v3	783944	786680	Pf3D7_04_v3	PF3D7_0417700	conserved Plasmodium protein, unknown function	-0.04119	0.055469	0.046153	0.081041	0.037841	-0.008554	-0.024732	0.055954	-0.024517	-0.20252	0.059803	-0.024517
Pf3D7_04_v3	786993	789592	Pf3D7_04_v3	PF3D7_0417800	cdc2-related protein kinase 1	-0.082761	-0.052646	0.004113	-0.020635	-0.028522	-0.012658	-0.029813	-0.036238	-0.0951	-0.067793	-0.018767	-0.0951
Pf3D7_04_v3	790474	793235	Pf3D7_04_v3	PF3D7_0417900	conserved Plasmodium protein, unknown function	0.031598	0.04769	0.00805	0.085962	0.017403	-0.012432	-0.012367	0.083985	0.007444	-0.117175	0.03311	0.007444
Pf3D7_04_v3	793577	810320	Pf3D7_04_v3	PF3D7_0418000	conserved Plasmodium protein, unknown function	0.062287	0.039538	0.022599	0.074537	-0.002665	0.033749	0.030034	0.050113	0.005991	-0.002559	0.013432	0.005991
Pf3D7_04_v3	810745	814892	Pf3D7_04_v3	PF3D7_0418100	protein SOC1, putative	0.092013	0.032647	0.017599	0.04774	0.026415	0.079428	0.041824	0.090604	0.025721	0.072612	0.040066	0.025721
Pf3D7_04_v3	817150	818939	Pf3D7_04_v3	PF3D7_0418200	eukaryotic translation initiation factor 3 subunit M, putative	-0.040777	0.013388	0.05715	0.084636	0.065971	0.119815	0.056051	0.006262	0.110262	0.229011	0.057957	0.110262
Pf3D7_04_v3	819112	822590	Pf3D7_04_v3	PF3D7_0418300	conserved Plasmodium protein, unknown function	-0.018399	0.015213	0.036531	-0.002668	0.008184	0.018005	0.020689	0.040079	0.011909	0.070699	0.033083	0.011909
Pf3D7_04_v3	829713	830791	Pf3D7_04_v3	PF3D7_0418400	conserved Plasmodium protein, unknown function	0.082639	0.149383	0.133352	0.212734	0.125363	0.186489	0.201141	0.161574	0.196784	0.114408	0.152635	0.196784
Pf3D7_04_v3	830792	832678	Pf3D7_04_v3	PF3D7_0418500	trafficking protein particle complex subunit 3, putative	0.055972	0.053736	-0.023609	0.016887	-0.015348	0.057655	-0.011847	-0.050714	0.017764	-0.01978	0.027939	0.017764
Pf3D7_04_v3	834144	840679	Pf3D7_04_v3	PF3D7_0418600	regulator of chromosome condensation, putative	-0.024537	-0.079259	-0.039607	-0.018754	-0.031501	-0.062777	-0.059712	-0.028021	-0.010427	0.00695	0.013305	-0.010427
Pf3D7_04_v3	840946	843155	Pf3D7_04_v3	PF3D7_0418700	RNA-binding protein NOB1, putative	-0.046552	-0.051878	-0.070323	-0.023298	-0.080237	-0.030279	-0.006546	-0.018192	-0.072849	-0.055592	-0.047383	-0.072849
Pf3D7_04_v3	843312	845419	Pf3D7_04_v3	PF3D7_0418800	MOLO1 domain-containing protein, putative	0.091067	0.009611	0.000637	0.043364	0.034421	0.070232	0.088449	0.074388	0.001689	0.214597	0.02907	0.001689
Pf3D7_04_v3	846981	849309	Pf3D7_04_v3	PF3D7_0418900	conserved protein, unknown function	0.090073	0.071914	-0.031769	0.109819	0.013445	0.024626	0.069429	0.056543	0.103534	0.075489	0.073641	0.103534
Pf3D7_04_v3	849543	852376	Pf3D7_04_v3	PF3D7_0419000	conserved Plasmodium protein, unknown function	0.046931	0.015029	0.038085	0.072825	0.090305	0.05626	0.021759	0.023358	-0.026781	0.092776	0.035255	-0.026781
Pf3D7_04_v3	852377	853816	Pf3D7_04_v3	PF3D7_0419100	conserved Plasmodium protein, unknown function	-0.022637	-0.021597	0.015311	0.03606	0.002876	-0.008086	-0.100995	-0.019064	-0.061271	-0.115641	-0.013309	-0.061271
Pf3D7_04_v3	855648	857299	Pf3D7_04_v3	PF3D7_0419300	conserved Plasmodium protein, unknown function	-0.051277	-0.019669	-0.042768	-0.026521	0.00643	-0.013503	0.010837	-0.014643	-0.01553	0.093867	0.002705	-0.01553
Pf3D7_04_v3	857748	866207	Pf3D7_04_v3	PF3D7_0419400	conserved Plasmodium protein, unknown function	0.035783	0.012473	-0.024032	0.037176	0.063185	0.043543	0.019179	0.026066	-0.008769	0.02016	0.034206	-0.008769
Pf3D7_04_v3	866251	868361	Pf3D7_04_v3	PF3D7_0419500	conserved Plasmodium membrane protein, unknown function	0.095199	0.009152	-0.027128	-0.039213	0.025289	-0.069954	-0.00691	-0.026525	0.002495	-0.076338	0.009986	0.002495
Pf3D7_04_v3	870487	872123	Pf3D7_04_v3	PF3D7_0419600	ran-specific GTPase-activating protein 1, putative	0.125464	0.063016	0.064282	0.103126	0.087329	0.099851	0.033641	0.076736	0.116731	0.073614	0.097791	0.116731
Pf3D7_04_v3	872888	874365	Pf3D7_04_v3	PF3D7_0419700	apical merozoite protein	0.143695	0.087496	0.102835	0.062568	0.190637	0.093621	0.009726	0.037937	0.020586	-0.341718	0.068632	0.020586
Pf3D7_04_v3	874561	875771	Pf3D7_04_v3	PF3D7_0419800	60S ribosomal protein L7ae/L30e, putative	-0.100078	-0.091762	-0.117395	-0.126657	-0.024888	-0.121183	-0.080192	-0.053188	-0.022172	-0.262142	-0.030501	-0.022172
Pf3D7_04_v3	877772	894116	Pf3D7_04_v3	PF3D7_0419900	phosphatidylinositol 4-kinase, putative	0.047741	-0.013289	-0.00179	0.029691	0.026272	0.068099	0.036773	0.035396	0.020359	-0.060328	0.03584	0.020359
Pf3D7_04_v3	894362	904974	Pf3D7_04_v3	PF3D7_0420000	zinc finger protein, putative	0.058288	0.008309	-0.015858	0.052431	0.004542	0.017329	0.012467	0.039408	-0.01804	0.005306	0.008143	-0.01804
Pf3D7_04_v3	906806	909051	Pf3D7_04_v3	PF3D7_0420100	serine/threonine protein kinase RIO2	0.002403	-0.020427	-0.027959	-0.05069	-0.005478	-0.054389	0.023311	-0.018012	0.02038	-0.119246	-0.022253	0.02038
Pf3D7_04_v3	909937	912221	Pf3D7_04_v3	PF3D7_0420200	holo-[acyl-carrier-protein] synthase, putative	0.065579	0.019059	-0.015582	0.060997	0.056784	0.009423	-0.01871	0.027097	-0.033528	-0.10315	0.065617	-0.033528
Pf3D7_04_v3	917740	928661	Pf3D7_04_v3	PF3D7_0420300	AP2 domain transcription factor, putative	-0.023706	-0.012474	0.009975	0.005675	-0.004312	0.024597	-0.002808	-0.003868	-0.021642	-0.011462	0.006935	-0.021642
Pf3D7_04_v3	929090	930272	Pf3D7_04_v3	PF3D7_0420400	ribosome-recycling factor	0.021902	-0.033525	-0.002503	-0.043134	-0.049386	-0.022891	-0.017602	-0.052677	0.033417	0.056047	0.070097	0.033417
Pf3D7_04_v3	930273	931858	Pf3D7_04_v3	PF3D7_0420500	conserved Plasmodium protein, unknown function	-0.044005	-0.036159	-0.013186	-0.029802	-0.109403	-0.048582	-0.039427	-0.062279	0.034196	0.059152	-0.013875	0.034196
Pf3D7_04_v3	932213	934494	Pf3D7_04_v3	PF3D7_0420600	conserved Plasmodium protein, unknown function	-0.008226	0.027268	0.053433	0.052174	0.076742	0.015804	0.036098	0.013594	0.110829	0.05556	0.104899	0.110829
Pf3D7_04_v3	934781	942125	Pf3D7_04_v3	PF3D7_0420700	erythrocyte membrane protein 1, PfEMP1	0.021334	0.091338	0.112648	0.056448	0.00943	0.016735	0.030489	0.05299	0.220583	0.194918	0.212754	0.220583
Pf3D7_04_v3	957817	965861	Pf3D7_04_v3	PF3D7_0421100	erythrocyte membrane protein 1, PfEMP1	-0.204845	-0.639752	0.186949	-0.452682	-0.101077	-2.01237	0.163162	-0.302032	0.353992	-0.814581	0.04666	0.353992
Pf3D7_04_v3	966837	968523	Pf3D7_04_v3	PF3D7_0421200	rifin	0.142691	0.300497	0.48245	0.270115	0.221192	0.234843	0.899536	0.995516	0.386912	0.363962	0.370276	0.386912
Pf3D7_04_v3	968781	976841	Pf3D7_04_v3	PF3D7_0421300	erythrocyte membrane protein 1, PfEMP1	0.208562	0.308641	0.409398	0.228587	0.207001	0.230686	0.931648	1.06331	0.359006	0.452063	0.309915	0.359006
Pf3D7_04_v3	981573	983240	Pf3D7_04_v3	PF3D7_0421500	rifin, pseudogene	0.07314	0.251499	0.285411	0.154993	0.162008	0.154765	0.57953	0.773713	0.264033	0.381367	0.24177	0.264033
Pf3D7_04_v3	985885	987644	Pf3D7_04_v3	PF3D7_0421600	erythrocyte membrane protein 1 (PfEMP1)-like pseudogene	0.036854	-0.020416	0.116064	-0.002024	0.041879	0.102035	0.03218	0.003674	0.132506	0.154834	0.136162	0.132506
Pf3D7_04_v3	987645	994610	Pf3D7_04_v3	PF3D7_0421700	conserved Plasmodium protein, unknown function	0.004389	-0.089482	0.025785	-0.058136	-0.001591	-0.022749	-0.094247	-0.079786	0.006043	-0.087279	-0.035348	0.006043
Pf3D7_04_v3	998397	1000435	Pf3D7_04_v3	PF3D7_0422000	steroid dehydrogenase, putative	-0.007555	-0.054167	-0.043406	-0.039825	0.026155	0.006595	-0.092774	-0.032488	0.031551	-0.089839	0.027827	0.031551
Pf3D7_04_v3	1001363	1003020	Pf3D7_04_v3	PF3D7_0422100	transmembrane emp24 domain-containing protein, putative	0.146503	0.022141	0.011152	0.09865	0.048933	0.064003	-0.045689	-0.011356	0.065882	0.055393	6.9e-05	0.065882
Pf3D7_04_v3	1004212	1017497	Pf3D7_04_v3	PF3D7_0422200	erythrocyte membrane-associated antigen	0.004793	0.020041	-0.01314	-0.020853	0.070878	0.06765	0.016766	0.034396	-0.012365	0.058787	-0.067391	-0.012365
Pf3D7_04_v3	1022237	1024416	Pf3D7_04_v3	PF3D7_0422300	alpha tubulin 2	0.030396	-0.031009	-0.001536	-0.003478	0.006393	-0.019742	-0.023542	-0.001001	-0.016211	-0.040511	0.034505	-0.016211
Pf3D7_04_v3	1026398	1027649	Pf3D7_04_v3	PF3D7_0422400	40S ribosomal protein S19	0.054126	0.047572	0.06839	0.0802	0.065651	0.05955	0.053067	0.116869	0.127275	-0.006846	0.170967	0.127275
Pf3D7_04_v3	1029079	1038203	Pf3D7_04_v3	PF3D7_0422500	pre-mRNA-splicing helicase BRR2, putative	0.005115	-0.022482	-0.11454	-0.048562	-0.043747	-0.113797	-0.02891	-0.032718	-0.00423	-0.06593	0.05296	-0.00423
Pf3D7_04_v3	1040220	1041892	Pf3D7_04_v3	PF3D7_0422700	eukaryotic initiation factor 4A-III, putative	-0.01491	-0.013674	0.015704	4.5e-05	0.000594	-0.007803	-0.019846	-0.025879	0.008366	0.011711	0.027018	0.008366
Pf3D7_04_v3	1042314	1045138	Pf3D7_04_v3	PF3D7_0422800	serpentine receptor, putative	0.014346	0.047885	0.075783	0.009487	0.08112	0.011475	0.062983	0.075613	0.016177	-0.029297	0.050277	0.016177
Pf3D7_04_v3	1045139	1046946	Pf3D7_04_v3	PF3D7_0422900	methyltransferase, putative	-0.031807	0.04751	0.067615	-0.015474	0.030189	0.054495	0.03282	0.016419	-0.025791	0.036147	0.010227	-0.025791
Pf3D7_04_v3	1047446	1048728	Pf3D7_04_v3	PF3D7_0423000	conserved Plasmodium protein, unknown function	0.021034	0.101968	0.043505	0.106925	0.115663	0.075689	0.1161	0.08901	0.021808	0.031944	0.038741	0.021808
Pf3D7_04_v3	1049020	1050144	Pf3D7_04_v3	PF3D7_0423100	AP-4 complex subunit sigma, putative	0.007619	-0.06737	0.009117	0.003882	-0.018176	-0.022163	-0.027245	0.037025	-0.107891	-0.041705	-0.01366	-0.107891
Pf3D7_04_v3	1051326	1053256	Pf3D7_04_v3	PF3D7_0423300	conserved Plasmodium protein, unknown function	0.076838	0.065415	0.026938	0.118762	0.137527	0.027285	0.018418	0.08725	0.130708	0.013295	0.177223	0.130708
Pf3D7_04_v3	1055415	1056568	Pf3D7_04_v3	PF3D7_0423400	apical asparagine-rich protein AARP	-0.06638	-0.149576	-0.108333	-0.132148	-0.075601	-0.132158	-0.056508	-0.053723	-0.076968	-0.004554	-0.138004	-0.076968
Pf3D7_04_v3	1058747	1060801	Pf3D7_04_v3	PF3D7_0423500	glideosome associated protein with multiple membrane spans 2	-0.027922	-0.047118	-0.078018	-0.063598	0.047962	-0.147443	-0.070769	0.019606	-0.046015	-0.151342	-0.112769	-0.046015
Pf3D7_04_v3	1061540	1066878	Pf3D7_04_v3	PF3D7_0423600	conserved Plasmodium protein, unknown function	-0.031535	-0.063144	-0.045938	-0.078967	-0.019558	-0.066922	-0.025492	-0.020164	0.041753	0.001112	0.038574	0.041753
Pf3D7_04_v3	1071185	1072095	Pf3D7_04_v3	PF3D7_0423700	early transcribed membrane protein 4	0.040068	-0.012215	-0.064245	-0.068612	-0.033267	-0.025355	-0.060641	0.022858	-0.012305	-0.059485	0.045131	-0.012305
Pf3D7_04_v3	1076097	1077730	Pf3D7_04_v3	PF3D7_0423800	cysteine-rich protective antigen	0.078038	0.0801	-0.081756	0.030602	0.067031	-0.067769	-0.117325	-0.00238	-0.107732	-0.163093	-0.01106	-0.107732
Pf3D7_04_v3	1077731	1078738	Pf3D7_04_v3	PF3D7_0423900	probable protein, unknown function	0.004277	-0.036633	-0.121508	-0.100127	-0.028038	-0.088422	-0.020744	-0.079493	-0.111887	0.015739	-0.083128	-0.111887
Pf3D7_04_v3	1080709	1082276	Pf3D7_04_v3	PF3D7_0424000	Plasmodium exported protein (PHISTc), unknown function	-0.030296	0.019773	0.078057	0.013256	0.034764	-0.015203	0.038336	0.053963	0.038581	0.020764	0.063294	0.038581
Pf3D7_04_v3	1082277	1084400	Pf3D7_04_v3	PF3D7_0424100	reticulocyte binding protein homologue 5	0.023125	-0.100943	-0.080251	-0.106183	-0.046153	-0.077919	-0.050961	-0.062755	-0.067969	-0.15278	-0.057793	-0.067969
Pf3D7_04_v3	1085729	1091527	Pf3D7_04_v3	PF3D7_0424200	reticulocyte binding protein homologue 4	-0.016693	-0.077206	-0.043041	-0.073025	-0.042382	-0.078483	-0.040798	0.015152	-0.025606	-0.055986	-0.044231	-0.025606
Pf3D7_04_v3	1092888	1098085	Pf3D7_04_v3	PF3D7_0424300	erythrocyte binding antigen-165, pseudogene	-0.024489	-0.049628	0.041746	-0.038065	-0.01021	-0.026892	0.029016	0.004297	0.016983	-0.023642	-0.023196	0.016983
Pf3D7_04_v3	1099561	1107361	Pf3D7_04_v3	PF3D7_0424400	surface-associated interspersed protein 4.2 (SURFIN 4.2)	0.023896	0.003093	0.094997	0.012174	-0.001802	-0.000605	-0.008055	0.031514	0.029979	0.029269	0.052961	0.029979
Pf3D7_04_v3	1109810	1112543	Pf3D7_04_v3	PF3D7_0424500	serine/threonine protein kinase, FIKK family	0.028162	0.002815	0.010497	-0.038374	0.020503	-0.003818	0.01199	-0.027852	-0.050226	-0.080949	-0.077463	-0.050226
Pf3D7_04_v3	1113095	1114736	Pf3D7_04_v3	PF3D7_0424600	Plasmodium exported protein (PHISTb), unknown function	-0.046943	-0.090449	-0.094431	-0.019874	-0.0971	-0.042495	-0.069579	-0.082525	-0.096732	-0.100461	-0.112351	-0.096732
Pf3D7_04_v3	1118180	1122664	Pf3D7_04_v3	PF3D7_0424700	serine/threonine protein kinase, FIKK family	0.092368	0.159442	0.231048	0.150868	0.154879	0.161335	0.134247	0.104009	0.155233	0.163621	0.164496	0.155233
Pf3D7_04_v3	1123736	1125254	Pf3D7_04_v3	PF3D7_0424800	Plasmodium exported protein (PHISTb), unknown function	0.050374	-0.007003	-0.01113	-0.005206	-0.098984	0.03869	0.010508	-0.080053	-0.054518	-0.050184	-0.027581	-0.054518
Pf3D7_04_v3	1127529	1129052	Pf3D7_04_v3	PF3D7_0424900	Plasmodium exported protein (PHISTa), unknown function	0.082339	-0.068394	-0.06464	0.010324	-0.025191	-0.058299	0.009566	-0.060292	-0.08479	-0.064987	-0.038046	-0.08479
Pf3D7_04_v3	1129410	1131143	Pf3D7_04_v3	PF3D7_0425000	Plasmodium exported protein, unknown function, pseudogene	-0.049296	-0.084233	-0.009496	-0.018472	-0.077392	-0.046995	-0.03342	-0.133269	-0.134669	-0.010846	-0.176186	-0.134669
Pf3D7_04_v3	1136336	1137635	Pf3D7_04_v3	PF3D7_0425200	Plasmodium exported protein (hyp15), unknown function	0.005261	-0.06852	-0.02038	0.056012	-0.084897	-0.025501	-0.045306	-0.044297	-0.00054	-0.072484	-0.11405	-0.00054
Pf3D7_04_v3	1140972	1142346	Pf3D7_04_v3	PF3D7_0425300	Plasmodium exported protein (PHISTa), unknown function, pseudogene	0.08943	-0.032783	0.030628	0.041144	-0.086095	-0.012908	-0.123476	-0.024727	-0.111216	-0.200245	-0.065331	-0.111216
Pf3D7_04_v3	1143742	1145074	Pf3D7_04_v3	PF3D7_0425400	Plasmodium exported protein (PHISTa), unknown function	0.051891	-0.042437	0.008179	-0.011148	0.012238	0.032019	0.024866	0.010748	0.015764	0.000947	-0.100658	0.015764
Pf3D7_04_v3	1156173	1168071	Pf3D7_04_v3	PF3D7_0425800	erythrocyte membrane protein 1, PfEMP1	-0.075996	-0.048506	0.091634	-0.059356	-0.132484	-0.069895	-0.077667	-0.067799	-0.056333	0.045122	0.010592	-0.056333
Pf3D7_04_v3	1172803	1180476	Pf3D7_04_v3	PF3D7_0426000	erythrocyte membrane protein 1, PfEMP1	-0.028238	-0.133808	0.22496	-0.055327	-0.101834	-0.059896	-0.144567	-0.042525	0.004166	-0.074564	-0.017536	0.004166
Pf3D7_05_v3	20679	28706	Pf3D7_05_v3	PF3D7_0500100	erythrocyte membrane protein 1, PfEMP1	-0.008286	-0.055118	0.139528	-0.035929	-0.036523	-0.06122	-0.091105	-0.02712	0.221053	0.088878	0.20256	0.221053
Pf3D7_05_v3	32806	34628	Pf3D7_05_v3	PF3D7_0500400	rifin	0.250469	0.050881	0.456674	0.319909	0.659024	0.255362	0.003612	0.124544	0.470328	0.107729	0.462005	0.470328
Pf3D7_05_v3	36214	37814	Pf3D7_05_v3	PF3D7_0500500	rifin	0.171228	0.05214	0.334109	0.203713	-2.08908	0.164262	-0.020709	0.085283	0.450962	0.171708	0.414982	0.450962
Pf3D7_05_v3	39193	40738	Pf3D7_05_v3	PF3D7_0500600	stevor, pseudogene	0.093231	0.024811	0.166141	0.064998	0.008836	-0.021942	-0.057028	0.04234	0.315441	0.044911	0.265048	0.315441
Pf3D7_05_v3	43077	48011	Pf3D7_05_v3	PF3D7_0500800	mature parasite-infected erythrocyte surface antigen	0.080786	-0.103934	0.178039	-0.06818	0.014515	-0.054333	-0.096121	-0.079475	0.202925	-0.002968	0.129386	0.202925
Pf3D7_05_v3	50172	52760	Pf3D7_05_v3	PF3D7_0500900	serine/threonine protein kinase, FIKK family	-0.025594	-0.136499	0.090895	-0.077623	-0.082464	-0.150757	-0.1024	-0.114443	0.033872	-0.072055	-0.000605	0.033872
Pf3D7_05_v3	55591	57122	Pf3D7_05_v3	PF3D7_0501000	Plasmodium exported protein, unknown function	0.098699	-0.120873	0.06834	-0.067083	-0.023083	-0.111587	-0.084772	0.014528	0.048914	-0.135058	0.047168	0.048914
Pf3D7_05_v3	57787	59976	Pf3D7_05_v3	PF3D7_0501100	heat shock protein 40, type II	0.039023	-0.110275	-0.090843	-0.11919	-0.033462	-0.087821	-0.087319	-0.092507	-0.046845	-0.165813	-0.126911	-0.046845
Pf3D7_05_v3	63815	65739	Pf3D7_05_v3	PF3D7_0501200	parasite-infected erythrocyte surface protein	0.041097	-0.025719	-0.069716	-0.001809	-0.03627	-0.095804	-0.023702	-0.001107	0.043686	0.045304	-0.021164	0.043686
Pf3D7_05_v3	68680	70363	Pf3D7_05_v3	PF3D7_0501300	skeleton-binding protein 1	-0.066222	-0.138512	-0.077575	-0.161016	-0.122268	-0.174621	-0.130723	-0.094893	-0.119828	-0.117014	-0.175555	-0.119828
Pf3D7_05_v3	74259	80092	Pf3D7_05_v3	PF3D7_0501400	interspersed repeat antigen	-0.016626	-0.1833	-0.106888	-0.079732	-0.0217	-0.206863	-0.04881	-0.085139	-0.116971	-0.026785	-0.191283	-0.116971
Pf3D7_05_v3	80884	82586	Pf3D7_05_v3	PF3D7_0501500	rhoptry-associated protein 3	-0.063406	-0.086527	-0.0593	-0.10235	-0.041001	-0.08284	-0.06525	-0.108844	-0.017148	0.030808	-0.083301	-0.017148
Pf3D7_05_v3	83791	85487	Pf3D7_05_v3	PF3D7_0501600	rhoptry-associated protein 2	0.043862	0.012812	-0.037428	-0.083453	0.063927	-0.035043	0.04024	0.068715	-0.079011	0.059751	-0.012	-0.079011
Pf3D7_05_v3	86570	89451	Pf3D7_05_v3	PF3D7_0501700	anaphase-promoting complex subunit 3, putative	0.159154	0.07092	0.097826	0.068783	0.124154	0.05806	0.029129	0.094133	0.174713	0.005289	0.138408	0.174713
Pf3D7_05_v3	91111	94841	Pf3D7_05_v3	PF3D7_0501800	chromatin assembly factor 1 subunit A	0.275852	0.348705	0.446235	0.295374	0.312104	0.27779	0.385902	0.351292	0.639679	0.577857	0.557654	0.639679
Pf3D7_05_v3	94911	96883	Pf3D7_05_v3	PF3D7_0501900	conserved protein, unknown function	-0.070341	-0.162643	-0.072127	-0.058973	-0.068972	-0.134098	-0.121646	-0.174031	0.055468	0.006803	-0.040087	0.055468
Pf3D7_05_v3	97407	102044	Pf3D7_05_v3	PF3D7_0502000	vacuolar protein sorting-associated protein 11, putative	0.00226	-0.106558	-0.022017	-0.060475	-0.064183	-0.053657	-0.045453	-0.095417	-0.002667	0.032078	-0.041874	-0.002667
Pf3D7_05_v3	102045	103147	Pf3D7_05_v3	PF3D7_0502100	HCNGP-like protein	-0.037871	-0.05181	-0.073844	-0.056687	-0.021306	-0.163598	-0.016154	-0.086129	0.019224	-0.062781	-0.059634	0.019224
Pf3D7_05_v3	104006	105987	Pf3D7_05_v3	PF3D7_0502200	protein Mpv17, putative	0.017712	0.007038	0.001931	-0.035491	0.01901	-0.104203	0.028542	0.027095	-0.007545	0.039161	-0.030497	-0.007545
Pf3D7_05_v3	106825	108188	Pf3D7_05_v3	PF3D7_0502300	conserved Plasmodium protein, unknown function	0.124513	0.111168	0.062051	-0.014234	0.081977	0.011312	0.076045	0.035268	0.12896	-0.101275	0.011566	0.12896
Pf3D7_05_v3	109648	111941	Pf3D7_05_v3	PF3D7_0502400	merozoite surface protein 8	-0.014436	-0.085759	-0.024125	-0.050015	-0.009479	-0.049175	-0.053025	0.088631	-0.027396	-0.144336	-0.07546	-0.027396
Pf3D7_05_v3	113899	116183	Pf3D7_05_v3	PF3D7_0502500	conserved Plasmodium protein, unknown function	0.055694	0.089548	-0.000661	0.007499	0.024933	0.033061	-0.063714	0.052593	0.012949	-0.015095	-0.00522	0.012949
Pf3D7_05_v3	116201	120038	Pf3D7_05_v3	PF3D7_0502600	conserved Plasmodium protein, unknown function	-0.03372	-0.03657	-0.119623	-0.070438	0.002357	-0.123321	-0.078198	-0.028552	-0.053896	-0.208481	-0.142223	-0.053896
Pf3D7_05_v3	120039	121705	Pf3D7_05_v3	PF3D7_0502700	conserved protein, unknown function	0.078236	-0.069614	0.084747	0.018385	0.006953	0.005692	-0.06466	0.064014	0.088795	-0.021538	0.097007	0.088795
Pf3D7_05_v3	123098	124154	Pf3D7_05_v3	PF3D7_0502900	Tim10/DDP family zinc finger protein, putative	-0.000165	0.003802	-0.118124	-0.059365	-0.02692	-0.043855	0.008725	0.002143	-0.094413	0.013278	-0.106223	-0.094413
Pf3D7_05_v3	124866	126764	Pf3D7_05_v3	PF3D7_0503000	50S ribosomal protein L28, apicoplast, putative	0.066414	0.010712	-0.013432	0.033144	0.032396	-0.01406	0.075532	0.043688	0.063912	-0.066874	0.062428	0.063912
Pf3D7_05_v3	126814	128927	Pf3D7_05_v3	PF3D7_0503100	4-diphosphocytidyl-2-C-methyl-D-erythritol kinase, putative	0.072294	-0.000414	-0.01757	0.015663	0.017338	-0.021411	-0.043745	-0.003397	0.04886	-0.094517	0.025398	0.04886
Pf3D7_05_v3	130203	133642	Pf3D7_05_v3	PF3D7_0503200	conserved Plasmodium protein, unknown function	0.066966	0.009468	0.077871	-0.039765	0.036188	-0.04463	-0.022425	0.010391	0.050864	0.06543	0.070908	0.050864
Pf3D7_05_v3	134754	136180	Pf3D7_05_v3	PF3D7_0503300	serine/arginine-rich splicing factor 12	0.037828	0.147767	0.033703	-0.028547	-0.057437	0.041191	0.133971	-0.019097	0.024511	-0.000574	0.102286	0.024511
Pf3D7_05_v3	140460	141721	Pf3D7_05_v3	PF3D7_0503400	actin-depolymerizing factor 1	0.05119	0.040385	0.075971	0.103791	0.024379	0.026439	-0.037211	-0.047355	0.086042	0.117563	0.118065	0.086042
Pf3D7_05_v3	142621	145673	Pf3D7_05_v3	PF3D7_0503500	protein kinase, putative	0.024194	0.017889	0.046648	0.099238	0.059922	0.010532	0.011662	0.037841	0.136982	0.116469	0.118122	0.136982
Pf3D7_05_v3	146389	150381	Pf3D7_05_v3	PF3D7_0503600	myosin B	0.028529	-0.054109	-0.038848	-0.011016	-0.009654	-0.040032	-0.054808	-0.035069	-0.013798	-0.131926	-0.014737	-0.013798
Pf3D7_05_v3	151172	152634	Pf3D7_05_v3	PF3D7_0503800	60S ribosomal protein L31	0.085314	0.078443	0.050265	0.050033	-0.028991	0.012263	0.028131	0.036651	0.091091	0.005565	0.046621	0.091091
Pf3D7_05_v3	153639	156307	Pf3D7_05_v3	PF3D7_0503900	conserved Plasmodium protein, unknown function	0.093215	0.057332	0.004001	0.015419	-0.018376	-0.111797	-0.089053	-0.018269	-0.051285	-0.215558	-0.143264	-0.051285
Pf3D7_05_v3	157375	165218	Pf3D7_05_v3	PF3D7_0504000	cation transporting P-ATPase	0.005208	-0.02892	-0.037013	0.012175	0.018819	-0.070254	-0.011903	-0.023367	0.004497	-0.057106	-0.021596	0.004497
Pf3D7_05_v3	165400	166892	Pf3D7_05_v3	PF3D7_0504100	AN1-type zinc finger protein, putative	0.024501	-0.015851	-0.01881	-0.027163	-0.044173	-0.069464	-0.037339	-0.025218	-0.008915	0.061125	-0.027685	-0.008915
Pf3D7_05_v3	167399	169525	Pf3D7_05_v3	PF3D7_0504200	ATP-dependent RNA helicase DDX27, putative	0.032686	-0.047403	0.044659	0.007747	0.049219	0.02583	0.002468	0.043575	0.015475	0.090665	0.022001	0.015475
Pf3D7_05_v3	169526	170840	Pf3D7_05_v3	PF3D7_0504300	conserved Plasmodium protein, unknown function	-0.033277	0.004442	0.024475	0.024265	-0.042475	0.058377	-0.007233	0.026021	-0.04342	0.000925	-0.025919	-0.04342
Pf3D7_05_v3	171900	174667	Pf3D7_05_v3	PF3D7_0504400	ATP-dependent helicase, putative	0.037589	-0.010674	0.048268	-0.000542	-0.019099	-0.00532	0.014751	0.011235	0.037245	0.02022	0.017592	0.037245
Pf3D7_05_v3	174739	176683	Pf3D7_05_v3	PF3D7_0504500	MOLO1 domain-containing protein, putative	0.086198	-0.016221	0.057666	0.095707	-0.011783	0.024873	-0.027165	0.027556	0.087632	-0.037335	0.118927	0.087632
Pf3D7_05_v3	177160	178805	Pf3D7_05_v3	PF3D7_0504600	2-oxoisovalerate dehydrogenase subunit beta, mitochondrial, putative	0.0174	-0.028267	-0.04897	-0.022954	-0.056935	0.050879	-0.038169	-0.006336	-0.005922	0.013535	0.082074	-0.005922
Pf3D7_05_v3	180171	187641	Pf3D7_05_v3	PF3D7_0504700	centrosomal protein CEP120, putative	0.08814	0.010597	0.050252	-0.050549	-0.03918	0.029636	-0.01583	0.043636	-0.067848	-0.262733	0.006136	-0.067848
Pf3D7_05_v3	187642	204982	Pf3D7_05_v3	PF3D7_0504800	conserved Plasmodium protein, unknown function	0.064073	0.001199	-0.01721	-0.030389	-0.041185	-0.00673	-0.04129	-0.03931	0.046505	0.150844	0.054273	0.046505
Pf3D7_05_v3	206200	208625	Pf3D7_05_v3	PF3D7_0504900	conserved protein, unknown function	0.066696	0.02071	0.038353	0.04664	-0.099544	0.025816	-0.015402	0.002455	0.09611	0.1615	0.119017	0.09611
Pf3D7_05_v3	208812	218439	Pf3D7_05_v3	PF3D7_0505000	MMS19-like protein, putative	0.015177	0.00821	0.062553	-0.005079	-0.029581	-0.027415	0.007506	-0.019735	0.034874	-0.047716	0.094019	0.034874
Pf3D7_05_v3	220589	229503	Pf3D7_05_v3	PF3D7_0505100	trafficking protein particle complex subunit 8, putative	0.015999	0.120506	0.121908	0.080418	0.038388	0.076162	0.074016	0.134367	0.120033	0.157425	0.145558	0.120033
Pf3D7_05_v3	230445	232642	Pf3D7_05_v3	PF3D7_0505200	actin-like protein, putative	-0.007742	0.00575	-0.017641	0.007734	-0.00723	-0.008454	0.011729	0.017408	0.0143	0.022899	0.043049	0.0143
Pf3D7_05_v3	233565	235896	Pf3D7_05_v3	PF3D7_0505300	UDP-N-acetylglucosamine transporter, putative	0.07927	0.035156	0.093937	0.105835	-0.026862	0.025043	-0.01869	0.009844	-0.017679	-0.060898	0.011923	-0.017679
Pf3D7_05_v3	235897	238615	Pf3D7_05_v3	PF3D7_0505400	conserved protein, unknown function	0.029627	0.023408	0.025399	0.006947	0.009365	0.028239	0.030146	0.073362	-0.001855	-0.031138	0.029915	-0.001855
Pf3D7_05_v3	239206	244130	Pf3D7_05_v3	PF3D7_0505500	DNA mismatch repair protein MSH6, putative	-0.019615	-0.004615	-0.009563	0.01154	-0.007464	-0.038565	-0.002649	-0.017653	-0.054089	-0.038073	-0.006452	-0.054089
Pf3D7_05_v3	245683	247184	Pf3D7_05_v3	PF3D7_0505600	conserved protein, unknown function	-0.07121	-0.025432	-0.00136	0.0132	-0.006705	-0.00401	-0.028955	-0.073483	-0.011268	-0.006516	0.038635	-0.011268
Pf3D7_05_v3	247551	250825	Pf3D7_05_v3	PF3D7_0505700	conserved Plasmodium membrane protein, unknown function	0.012531	0.045941	0.034358	0.059143	0.036994	0.036483	0.068659	0.000964	0.057103	-0.07923	0.10261	0.057103
Pf3D7_05_v3	251797	252856	Pf3D7_05_v3	PF3D7_0505800	small ubiquitin-related modifier	-0.066831	-0.021885	-0.044174	0.010386	-0.075593	-0.039816	-0.025731	-0.009763	0.002184	0.044733	-0.006195	0.002184
Pf3D7_05_v3	254223	255767	Pf3D7_05_v3	PF3D7_0505900	mediator of RNA polymerase II transcription subunit 11, putative	-0.011486	-0.03274	0.041593	0.005253	-0.04903	-0.006889	-0.011406	-0.019546	0.024755	0.05026	0.012725	0.024755
Pf3D7_05_v3	255975	257563	Pf3D7_05_v3	PF3D7_0506000	conserved Plasmodium protein, unknown function	-0.011092	0.085129	0.015418	0.078159	-0.104977	0.016649	0.187531	0.028183	0.025096	-0.111318	-0.01432	0.025096
Pf3D7_05_v3	257564	259081	Pf3D7_05_v3	PF3D7_0506100	60S ribosomal subunit protein L24, putative	0.031022	0.040038	0.013968	0.025659	0.028336	0.016674	0.024197	0.054583	-0.000826	0.012484	0.021892	-0.000826
Pf3D7_05_v3	259514	260854	Pf3D7_05_v3	PF3D7_0506200	TATA-box-binding protein	0.125163	0.116283	0.042314	0.030361	0.068206	0.029323	0.069309	0.056618	-0.006829	0.126905	0.005877	-0.006829
Pf3D7_05_v3	260855	262428	Pf3D7_05_v3	PF3D7_0506300	conserved protein, unknown function	0.012673	0.000433	-0.06926	-0.027046	0.016741	-0.051498	0.022985	-0.009153	-0.119923	-0.088106	-0.121556	-0.119923
Pf3D7_05_v3	262429	264175	Pf3D7_05_v3	PF3D7_0506400	conserved Plasmodium protein, unknown function	0.025201	0.148201	0.091943	0.063251	0.081686	0.159959	0.035332	0.062023	0.070724	0.054454	0.090138	0.070724
Pf3D7_05_v3	265345	278559	Pf3D7_05_v3	PF3D7_0506500	conserved Plasmodium protein, unknown function	0.128595	0.081893	0.004939	0.021793	0.091883	0.078089	0.132916	0.039932	0.093804	0.271831	0.027519	0.093804
Pf3D7_05_v3	278560	279745	Pf3D7_05_v3	PF3D7_0506600	histone deacetylase, putative, pseudogene	-0.04044	-0.049303	-0.139302	-0.041412	-0.042066	-0.074523	0.065049	-0.065476	-0.119222	-0.04563	-0.108592	-0.119222
Pf3D7_05_v3	280636	283595	Pf3D7_05_v3	PF3D7_0506700	GTPase-activating protein, putative	0.005082	0.020915	0.074869	0.078852	0.021184	0.010591	0.030354	0.060067	0.073743	-0.004448	0.03732	0.073743
Pf3D7_05_v3	284441	288273	Pf3D7_05_v3	PF3D7_0506800	transcription factor 25, putative	-0.045035	-4.9e-05	-0.050648	0.003218	-0.033045	-0.000169	0.015395	0.064516	0.049562	0.152124	-0.018323	0.049562
Pf3D7_05_v3	288526	291305	Pf3D7_05_v3	PF3D7_0506900	rhomboid protease ROM4	0.039738	0.015563	0.005153	0.010804	0.01422	0.017482	0.042563	0.014896	0.018217	0.048594	0.070593	0.018217
Pf3D7_05_v3	294418	296153	Pf3D7_05_v3	PF3D7_0507100	60S ribosomal protein L4	-0.042249	-0.015938	-0.067282	-0.053442	-0.012959	-0.049489	-0.030876	-0.100496	0.126654	0.079841	0.015212	0.126654
Pf3D7_05_v3	298177	300986	Pf3D7_05_v3	PF3D7_0507200	subtilisin-like protease 3	-0.030832	-0.010743	-0.002458	0.009912	-0.024976	-0.000252	-0.0094	0.009066	0.1014	0.207503	0.100302	0.1014
Pf3D7_05_v3	301680	304861	Pf3D7_05_v3	PF3D7_0507300	subtilisin-like ookinete protein SOPT	0.051712	-0.002667	0.047583	-0.014142	0.035646	0.046576	0.01674	0.026845	0.064602	0.043596	0.065665	0.064602
Pf3D7_05_v3	305711	306672	Pf3D7_05_v3	PF3D7_0507400	conserved Plasmodium protein, unknown function	0.028394	0.03872	0.129313	0.028721	0.021814	0.069164	0.071828	0.053805	0.109433	0.054689	0.096808	0.109433
Pf3D7_05_v3	307240	309806	Pf3D7_05_v3	PF3D7_0507500	subtilisin-like protease 1	-0.068115	-0.006079	0.061858	0.057269	0.022807	0.00431	-0.022071	0.017974	0.001956	-0.133017	-0.004903	0.001956
Pf3D7_05_v3	312949	315407	Pf3D7_05_v3	PF3D7_0507600	protein CAF40, putative	-0.041437	0.051073	-0.010265	-0.016198	0.006512	-0.014592	0.003646	0.025079	0.038383	0.04416	0.037503	0.038383
Pf3D7_05_v3	316516	318611	Pf3D7_05_v3	PF3D7_0507700	nuclear protein localization protein 4, putative	-0.018009	-0.035831	-0.088296	-0.087964	-0.082641	-0.023838	-0.010634	-0.066663	-0.069569	-0.046864	-0.038264	-0.069569
Pf3D7_05_v3	321989	327072	Pf3D7_05_v3	PF3D7_0507800	conserved protein, unknown function	0.120567	0.169325	0.15882	0.174272	0.04892	0.246959	0.100578	0.089205	0.126696	-0.066735	0.174268	0.126696
Pf3D7_05_v3	328492	329965	Pf3D7_05_v3	PF3D7_0508000	6-cysteine protein	0.012443	-0.069312	-0.058346	-0.024745	-0.001998	-0.030414	-0.047759	-0.01245	-0.002436	-0.101337	-0.010238	-0.002436
Pf3D7_05_v3	331430	336954	Pf3D7_05_v3	PF3D7_0508100	SET domain protein, putative	-0.028281	0.027041	-0.010012	-0.029129	-0.022633	-0.029639	0.06751	0.014632	-0.055367	-0.065399	-0.053216	-0.055367
Pf3D7_05_v3	337176	339275	Pf3D7_05_v3	PF3D7_0508200	longevity-assurance (LAG1) protein, putative	-0.015228	-0.011206	-0.098709	-0.071198	-0.097832	-0.042576	-0.050105	-0.035633	-0.101067	-0.023571	-0.052244	-0.101067
Pf3D7_05_v3	341955	343483	Pf3D7_05_v3	PF3D7_0508300	triose phosphate transporter	-0.02079	-0.017822	-0.042493	-0.037838	-0.049391	-0.037306	-0.004714	-0.029254	-0.121154	-0.044248	-0.041311	-0.121154
Pf3D7_05_v3	344681	346981	Pf3D7_05_v3	PF3D7_0508400	conserved protein, unknown function	-0.035642	-0.043389	-0.126712	-0.03404	-0.094864	-0.059495	-0.092461	-0.061654	-0.068906	0.062888	-0.068562	-0.068906
Pf3D7_05_v3	346982	355289	Pf3D7_05_v3	PF3D7_0508500	guanidine nucleotide exchange factor	0.035108	0.03276	0.003782	0.039349	0.005418	0.005033	0.008984	0.005234	0.030259	0.079835	0.033131	0.030259
Pf3D7_05_v3	355972	357260	Pf3D7_05_v3	PF3D7_0508600	conserved protein, unknown function	0.045489	0.010412	-0.050855	-0.006834	-0.075015	-0.037292	-0.048409	-0.026203	-0.049402	0.063591	-0.032212	-0.049402
Pf3D7_05_v3	358011	362983	Pf3D7_05_v3	PF3D7_0508700	pre-mRNA-processing ATP-dependent RNA helicase PRP5, putative	0.021773	0.026166	0.035083	0.01198	-0.012118	0.031689	-0.005834	0.052854	0.087968	0.198364	0.037302	0.087968
Pf3D7_05_v3	363338	364692	Pf3D7_05_v3	PF3D7_0508800	single-stranded DNA-binding protein	0.031907	0.002834	0.009272	-0.033449	-0.047303	-0.002967	0.049284	-0.018583	0.015061	0.0907	0.025552	0.015061
Pf3D7_05_v3	366772	376640	Pf3D7_05_v3	PF3D7_0508900	conserved Plasmodium protein, unknown function	-0.007866	-0.021127	0.014829	-0.042312	-0.047775	-0.02254	-0.064119	-0.014295	-0.020056	-0.009079	-0.024066	-0.020056
Pf3D7_05_v3	376641	378702	Pf3D7_05_v3	PF3D7_0509000	alpha-soluble NSF attachment protein, putative	-0.054863	-0.063535	-0.047192	-0.048198	-0.093491	-0.113169	-0.032024	-0.084193	0.018695	0.020088	-0.025985	0.018695
Pf3D7_05_v3	380827	386453	Pf3D7_05_v3	PF3D7_0509100	structural maintenance of chromosomes protein 4, putative	0.049898	0.025526	0.033101	0.017526	0.034061	0.029937	0.043728	0.026454	-0.015728	-0.006079	-0.006228	-0.015728
Pf3D7_05_v3	386706	388600	Pf3D7_05_v3	PF3D7_0509200	leucine-rich repeat protein	0.004636	0.031749	0.029713	0.052766	0.050571	0.023166	0.016677	0.007922	-0.004127	-0.199756	-0.02976	-0.004127
Pf3D7_05_v3	388601	389441	Pf3D7_05_v3	PF3D7_0509300	conserved Plasmodium protein, unknown function	-0.006533	0.011657	0.041922	0.021443	-0.016428	0.039221	0.053751	0.048834	0.016994	0.028889	0.051196	0.016994
Pf3D7_05_v3	389664	399247	Pf3D7_05_v3	PF3D7_0509400	RNA polymerase I	0.077013	0.063411	0.082998	-0.022614	-0.012646	0.047932	0.020919	0.036034	0.035606	0.136159	0.050407	0.035606
Pf3D7_05_v3	401187	403021	Pf3D7_05_v3	PF3D7_0509500	ERCC4 domain-containing protein, putative	-0.026534	0.014059	0.042234	-0.013346	-0.026263	0.013474	-0.003848	-0.017746	-0.030385	0.031149	-0.007283	-0.030385
Pf3D7_05_v3	403092	405801	Pf3D7_05_v3	PF3D7_0509600	asparagine--tRNA ligase	0.120825	0.064082	0.119373	0.060808	0.045937	0.0667	-0.037943	0.016075	0.0554	0.052636	0.158926	0.0554
Pf3D7_05_v3	405802	408147	Pf3D7_05_v3	PF3D7_0509700	conserved Plasmodium protein, unknown function	0.049452	0.030152	0.065353	0.010829	-0.080257	0.023294	-0.022526	0.033045	-0.032302	0.098221	0.021455	-0.032302
Pf3D7_05_v3	410018	415558	Pf3D7_05_v3	PF3D7_0509800	phosphatidylinositol 4-kinase	0.006886	0.06128	0.074707	0.029419	0.041598	0.079065	0.044743	0.022289	-0.011967	0.134519	0.017015	-0.011967
Pf3D7_05_v3	416115	417559	Pf3D7_05_v3	PF3D7_0509900	conserved protein, unknown function	-0.057366	-0.093328	0.024274	-0.057902	-0.03762	0.053238	-0.111509	-0.037311	-0.075141	-0.023313	-0.04625	-0.075141
Pf3D7_05_v3	417886	421675	Pf3D7_05_v3	PF3D7_0510000	conserved Plasmodium protein, unknown function	-0.019388	-0.017849	-0.002356	-0.012046	-0.037797	-0.014766	-0.016328	-0.04236	-0.066159	-0.013646	-0.109593	-0.066159
Pf3D7_05_v3	422496	430603	Pf3D7_05_v3	PF3D7_0510100	conserved protein, unknown function	-0.058724	0.054749	-0.01111	-0.021654	-0.02529	-0.018803	-0.025907	-0.038853	-0.031638	0.129615	-0.035747	-0.031638
Pf3D7_05_v3	437245	439988	Pf3D7_05_v3	PF3D7_0510200	peptidyl-prolyl cis-trans isomerase	-0.034676	-0.008932	0.033806	-0.020682	-0.01005	-0.016314	-0.003036	0.010427	-0.081618	-0.002284	-0.02074	-0.081618
Pf3D7_05_v3	440529	442129	Pf3D7_05_v3	PF3D7_0510300	stripes inner membrane complex protein, putative	0.043998	0.048791	-0.057805	-0.042992	-0.051442	-0.139974	-0.018734	0.001678	-0.068312	-0.019047	-0.005237	-0.068312
Pf3D7_05_v3	444010	445781	Pf3D7_05_v3	PF3D7_0510400	PDCD2 domain-containing protein, putative	0.032003	0.009267	0.095327	-0.005146	-0.00621	0.00037	0.026938	0.045345	-0.008406	-0.137799	-0.019255	-0.008406
Pf3D7_05_v3	445782	448752	Pf3D7_05_v3	PF3D7_0510500	topoisomerase I	0.012222	0.049317	-0.034915	-0.014323	0.021482	0.048607	0.056205	0.02971	0.000396	-0.002374	0.016054	0.000396
Pf3D7_05_v3	459051	460594	Pf3D7_05_v3	PF3D7_0510700	conserved Plasmodium protein, unknown function	-0.074047	0.066774	0.025722	-0.046598	-0.030322	0.076288	0.04365	-0.002675	-0.015813	0.011774	-0.00329	-0.015813
Pf3D7_05_v3	460767	464649	Pf3D7_05_v3	PF3D7_0510800	WD repeat-containing protein, putative	0.033519	0.037299	0.061125	0.101218	0.023072	0.102755	0.028237	0.031376	0.073767	0.074648	0.11237	0.073767
Pf3D7_05_v3	467335	468350	Pf3D7_05_v3	PF3D7_0511000	translationally-controlled tumor protein homolog	-0.079969	-0.045652	-0.041196	-0.00182	-0.030344	0.020784	-0.066227	-0.050534	-0.013555	-0.01538	-0.008972	-0.013555
Pf3D7_05_v3	469026	470092	Pf3D7_05_v3	PF3D7_0511100	conserved Plasmodium protein, unknown function	-0.094242	-0.025285	-0.030484	-0.014844	-0.064138	-0.054849	-0.080789	-0.116869	0.005944	0.102777	0.032691	0.005944
Pf3D7_05_v3	470805	474272	Pf3D7_05_v3	PF3D7_0511200	stearoyl-CoA desaturase	-0.034815	-0.04041	-0.131789	-0.046723	-0.130602	0.004288	-0.079631	-0.049016	-0.067047	-0.052705	-0.050552	-0.067047
Pf3D7_05_v3	474273	479132	Pf3D7_05_v3	PF3D7_0511300	MORN repeat protein, putative	-0.124122	-0.019389	-0.070117	-0.046343	-0.079155	0.007352	-0.061395	-0.025938	-0.045234	0.061979	-0.040094	-0.045234
Pf3D7_05_v3	481173	482818	Pf3D7_05_v3	PF3D7_0511400	conserved Plasmodium protein, unknown function	0.009097	0.079873	0.060739	-0.00493	0.062662	0.122763	0.017614	0.083974	0.074086	0.09089	0.035106	0.074086
Pf3D7_05_v3	486352	517023	Pf3D7_05_v3	PF3D7_0511500	RNA pseudouridylate synthase, putative	-0.002919	-0.021857	-0.042538	0.096077	0.050574	0.004628	0.133208	0.06309	0.002792	-0.303857	-0.077488	0.002792
Pf3D7_05_v3	517024	518135	Pf3D7_05_v3	PF3D7_0511600	apical rhoptry neck protein	-0.06112	-0.013135	-0.047602	-0.047309	-0.02468	-0.035594	-0.023366	-0.088171	-0.045428	-0.009293	-0.039248	-0.045428
Pf3D7_05_v3	518879	520328	Pf3D7_05_v3	PF3D7_0511700	EKC/KEOPS complex subunit CGI121	-0.059132	-0.048941	-0.047394	-0.071981	-0.040593	-0.011535	-0.022949	-0.094627	-0.098525	-0.046312	-0.125367	-0.098525
Pf3D7_05_v3	520470	522943	Pf3D7_05_v3	PF3D7_0511800	inositol-3-phosphate synthase	0.060577	0.089052	0.014469	0.043545	0.035567	0.082164	0.156668	0.125137	0.002428	0.055726	0.05313	0.002428
Pf3D7_05_v3	524776	527428	Pf3D7_05_v3	PF3D7_0511900	conserved Plasmodium protein, unknown function	0.007639	0.010287	0.029578	0.026853	0.018855	0.036468	0.024074	0.037135	-0.008677	-0.001662	0.00497	-0.008677
Pf3D7_05_v3	527429	528756	Pf3D7_05_v3	PF3D7_0512000	prefoldin subunit 6, putative	-0.149495	-0.013449	-0.118955	0.043652	-0.056121	-0.176176	0.00139	-0.029444	-0.120905	-0.193194	-0.113868	-0.120905
Pf3D7_05_v3	528757	529659	Pf3D7_05_v3	PF3D7_0512100	conserved protein, unknown function	-0.000105	-0.020638	-0.011168	0.138316	-0.063498	0.068753	0.070451	0.058762	-0.036482	0.078704	-0.017212	-0.036482
Pf3D7_05_v3	529684	532151	Pf3D7_05_v3	PF3D7_0512200	glutathione synthetase	-0.003445	-0.004385	-0.034883	-0.02278	-0.012418	-0.02666	0.00427	0.007257	-0.059792	-0.086236	-0.075217	-0.059792
Pf3D7_05_v3	533306	534588	Pf3D7_05_v3	PF3D7_0512300	CDK-activating kinase assembly factor MAT1	0.004994	0.051475	0.05975	0.001136	0.019109	0.025719	0.032636	0.047704	0.077381	-0.115371	0.01854	0.077381
Pf3D7_05_v3	536023	537227	Pf3D7_05_v3	PF3D7_0512400	conserved Plasmodium protein, unknown function	0.075622	0.115787	0.058389	0.022237	0.027861	0.101243	0.02101	0.082079	0.111939	0.099136	0.088315	0.111939
Pf3D7_05_v3	539481	542843	Pf3D7_05_v3	PF3D7_0512500	conserved Plasmodium protein, unknown function	0.073166	-0.05814	0.017091	-0.033755	-0.079356	0.028195	-0.021093	-0.10646	0.035033	-0.07453	-0.010542	0.035033
Pf3D7_05_v3	544290	546243	Pf3D7_05_v3	PF3D7_0512600	ras-related protein Rab-1B	-0.083135	-0.047052	-0.078232	-0.094947	-0.065345	-0.046035	0.003531	-0.031447	-0.157101	-0.122615	-0.112997	-0.157101
Pf3D7_05_v3	546484	547829	Pf3D7_05_v3	PF3D7_0512700	orotate phosphoribosyltransferase	-0.096657	-0.072789	-0.087024	-0.070746	-0.006392	-0.098658	-0.080223	0.040427	-0.122797	-0.090136	-0.096339	-0.122797
Pf3D7_05_v3	548156	553590	Pf3D7_05_v3	PF3D7_0512800	conserved Plasmodium protein, unknown function	-0.052898	-0.065525	-0.088403	0.008916	0.041423	0.006891	0.051681	-0.000414	-0.109711	-0.066425	-0.096418	-0.109711
Pf3D7_05_v3	553740	555025	Pf3D7_05_v3	PF3D7_0512900	AKAP-like protein	0.024798	0.047338	0.046933	0.098186	0.053553	-0.015121	0.040171	0.031972	-0.020091	-0.001412	0.019365	-0.020091
Pf3D7_05_v3	555026	556323	Pf3D7_05_v3	PF3D7_0513000	conserved protein, unknown function	0.067531	0.074798	0.103598	0.054303	0.088767	0.149981	0.056683	0.080761	0.069931	-0.035546	0.030695	0.069931
Pf3D7_05_v3	556789	558262	Pf3D7_05_v3	PF3D7_0513100	conserved protein, unknown function	-0.062199	-0.093602	-0.066104	-0.184209	-0.057156	0.004425	-0.079499	-0.060422	-0.151285	-0.205698	-0.107735	-0.151285
Pf3D7_05_v3	559263	568634	Pf3D7_05_v3	PF3D7_0513200	conserved Plasmodium protein, unknown function	0.033939	0.051554	0.046281	0.00662	0.032409	0.027288	0.040169	0.084739	-0.003466	0.032972	0.04621	-0.003466
Pf3D7_05_v3	568932	570169	Pf3D7_05_v3	PF3D7_0513300	purine nucleoside phosphorylase	0.024666	0.100183	-0.080564	0.001276	0.0399	-0.014317	0.049507	-0.100636	-0.074419	-0.139075	-0.024742	-0.074419
Pf3D7_05_v3	570808	572911	Pf3D7_05_v3	PF3D7_0513400	GTP-binding protein, putative	-0.068905	-0.084462	-0.093587	-0.041597	0.05001	-0.019085	-0.008503	-0.015585	-0.061805	0.011563	-0.08876	-0.061805
Pf3D7_05_v3	573338	574498	Pf3D7_05_v3	PF3D7_0513500	mitochondrial import inner membrane translocase subunit TIM16, putative	-0.051859	-0.051615	0.042656	0.001434	-0.035402	-0.021769	-0.069196	-0.054613	-0.011468	0.074527	-0.014975	-0.011468
Pf3D7_05_v3	574691	578755	Pf3D7_05_v3	PF3D7_0513600	deoxyribodipyrimidine photo-lyase, putative	0.000978	-0.001716	-0.006622	0.005624	-0.006181	0.013248	-0.053299	-0.015084	0.000184	-0.025218	-0.020259	0.000184
Pf3D7_05_v3	580977	584374	Pf3D7_05_v3	PF3D7_0513700	secreted ookinete protein, putative	0.03951	0.062083	0.058614	0.075387	0.042852	0.087777	0.016709	0.024419	0.069223	-0.020806	0.045116	0.069223
Pf3D7_05_v3	585107	586230	Pf3D7_05_v3	PF3D7_0513800	ras-related protein Rab-1A	0.056384	0.053007	0.028311	0.048538	0.054537	0.090674	0.044821	0.123743	0.052664	0.03188	0.087825	0.052664
Pf3D7_05_v3	587502	588799	Pf3D7_05_v3	PF3D7_0513900	conserved protein, unknown function	0.025919	0.046251	0.050451	0.041379	0.079412	0.073727	0.031547	0.0572	0.082247	0.062829	0.047248	0.082247
Pf3D7_05_v3	588800	591019	Pf3D7_05_v3	PF3D7_0514000	tubulin--tyrosine ligase, putative	-0.040246	-0.001986	-0.029921	-0.050845	0.029376	-0.014455	0.024056	-0.022893	-0.056502	-0.019156	-0.022925	-0.056502
Pf3D7_05_v3	591088	595913	Pf3D7_05_v3	PF3D7_0514100	ATP-dependent DNA helicase UvrD	-0.124117	0.043912	-0.088364	-0.092859	-0.017523	-0.032849	0.088619	-0.023717	-0.037284	0.003839	0.013205	-0.037284
Pf3D7_05_v3	596568	599671	Pf3D7_05_v3	PF3D7_0514200	conserved Plasmodium protein, unknown function	0.044339	0.017776	0.032079	0.042393	0.045491	0.032962	0.035783	0.08359	0.003359	-0.207596	0.041165	0.003359
Pf3D7_05_v3	599797	603683	Pf3D7_05_v3	PF3D7_0514300	aspartate--tRNA ligase, putative	0.068725	0.030229	-0.007461	0.001072	0.062449	0.050363	0.017374	-0.026566	-0.023105	-0.031897	0.035125	-0.023105
Pf3D7_05_v3	604777	606580	Pf3D7_05_v3	PF3D7_0514500	conserved Plasmodium membrane protein, unknown function	0.000887	0.017896	-0.014633	-0.005305	-0.000647	0.011894	0.005106	0.041869	0.012636	0.089104	-0.025492	0.012636
Pf3D7_05_v3	606855	608701	Pf3D7_05_v3	PF3D7_0514600	ribose-5-phosphate isomerase, putative	-0.051681	0.04481	-0.009296	-0.045461	0.07718	0.008715	-0.017555	0.014039	-0.0089	0.068196	-0.055772	-0.0089
Pf3D7_05_v3	609839	615021	Pf3D7_05_v3	PF3D7_0514700	MORN repeat protein, putative	-0.040075	0.001963	-0.043549	0.034743	0.038899	0.006521	0.008808	0.026215	-0.014717	0.045995	-0.005165	-0.014717
Pf3D7_05_v3	615032	618243	Pf3D7_05_v3	PF3D7_0514800	inositol polyphosphate multikinase, putative	-0.03497	-0.021492	-0.077862	-0.103857	0.009478	-0.0543	-0.020645	-0.071031	-0.117175	-0.090652	-0.094724	-0.117175
Pf3D7_05_v3	618379	620195	Pf3D7_05_v3	PF3D7_0514900	conserved Plasmodium protein, unknown function	0.008203	-0.062282	0.068062	-0.023136	0.010665	0.062904	0.043548	-0.026556	0.015609	0.144922	0.040896	0.015609
Pf3D7_05_v3	620560	623606	Pf3D7_05_v3	PF3D7_0515000	pre-mRNA-splicing factor CWC2, putative	0.100202	0.080641	0.038882	0.068003	0.086585	0.077101	0.089154	0.035077	0.078823	0.036463	0.054111	0.078823
Pf3D7_05_v3	624469	626731	Pf3D7_05_v3	PF3D7_0515100	rhomboid protease ROM9	0.007457	0.041315	-0.09034	0.007681	0.030001	-0.052149	0.027434	0.077741	0.043974	-0.086846	0.050717	0.043974
Pf3D7_05_v3	627048	628211	Pf3D7_05_v3	PF3D7_0515200	conserved Plasmodium protein, unknown function	0.039917	-0.095076	0.038031	-0.034506	-0.01402	-0.071205	-0.020786	-0.062909	-0.01281	0.028686	-0.009989	-0.01281
Pf3D7_05_v3	628731	635632	Pf3D7_05_v3	PF3D7_0515300	phosphatidylinositol 3-kinase	-0.073055	-0.013746	-0.077889	-0.013534	-0.047108	-0.058387	0.009907	-0.047587	0.076115	0.189354	0.009823	0.076115
Pf3D7_05_v3	637104	640631	Pf3D7_05_v3	PF3D7_0515400	conserved protein, unknown function	0.132416	-0.010453	0.114046	0.136055	0.099454	0.084945	0.125221	0.098054	0.168233	0.059808	0.141495	0.168233
Pf3D7_05_v3	640887	644935	Pf3D7_05_v3	PF3D7_0515500	amino acid transporter, putative	-0.003668	-0.057723	-0.038464	0.013516	-0.029464	-0.093936	-0.087034	-0.06376	-0.154075	-0.137095	-0.0849	-0.154075
Pf3D7_05_v3	646409	652356	Pf3D7_05_v3	PF3D7_0515600	conserved Plasmodium protein, unknown function	-0.029862	-0.059026	-0.0486	-0.067267	0.012932	-0.027494	-0.034182	-0.054529	-0.043157	-0.073159	-0.044707	-0.043157
Pf3D7_05_v3	653716	655586	Pf3D7_05_v3	PF3D7_0515700	glideosome-associated protein 40, putative	0.035457	0.036886	0.043877	0.032122	0.058222	0.019228	0.073139	0.060709	0.061086	0.067351	0.068428	0.061086
Pf3D7_05_v3	658173	658927	Pf3D7_05_v3	PF3D7_0515800	BolA-like protein, putative	-0.041662	-0.062735	-0.079741	-0.08757	-0.056918	-0.044604	-0.009865	-0.030539	-0.118906	-0.126542	-0.053344	-0.118906
Pf3D7_05_v3	659900	661386	Pf3D7_05_v3	PF3D7_0515900	NLI interacting factor-like phosphatase, putative	-0.029129	-0.031678	-0.041126	0.016186	-0.017962	0.026875	-0.00652	-0.033453	-0.006623	-0.02701	-0.089525	-0.006623
Pf3D7_05_v3	663301	667167	Pf3D7_05_v3	PF3D7_0516000	RAP protein, putative	-0.029228	-0.029968	-0.024323	-0.034826	-0.070297	-0.027923	-0.025813	-0.057602	-0.058444	-0.172389	-0.06954	-0.058444
Pf3D7_05_v3	667236	675111	Pf3D7_05_v3	PF3D7_0516100	cation-transporting ATPase 1	0.043437	0.071756	0.036826	0.038915	0.058038	0.083989	0.110936	0.070747	-0.038598	-0.056654	-0.080939	-0.038598
Pf3D7_05_v3	675559	676864	Pf3D7_05_v3	PF3D7_0516200	40S ribosomal protein S11	-0.004178	-0.077389	-0.075456	-0.054058	0.015992	-0.111989	-0.016953	-0.001302	-0.120094	-0.141228	-0.133302	-0.120094
Pf3D7_05_v3	678660	681192	Pf3D7_05_v3	PF3D7_0516300	tRNA pseudouridine synthase, putative	-0.122618	0.02356	-0.10145	-0.085594	-0.022529	-0.047106	-0.002171	-0.067203	-0.163338	-0.102697	-0.130612	-0.163338
Pf3D7_05_v3	681193	682687	Pf3D7_05_v3	PF3D7_0516400	phosducin-like protein 1, putative	-0.032921	-0.020657	0.004839	-0.042311	-0.037274	0.016619	0.00924	-0.051843	-0.034611	-0.078935	-0.074944	-0.034611
Pf3D7_05_v3	683458	686109	Pf3D7_05_v3	PF3D7_0516500	major facilitator superfamily domain-containing protein, putative	0.050489	0.057009	-0.045587	0.103982	0.008106	0.110455	-0.069315	0.02294	0.011906	0.076768	0.002771	0.011906
Pf3D7_05_v3	686560	691892	Pf3D7_05_v3	PF3D7_0516600	sporozoite surface antigen MB2	-0.139165	-0.100885	-0.050258	-0.086406	-0.049606	-0.030698	-0.015307	-0.094871	-0.095929	-0.039848	-0.083043	-0.095929
Pf3D7_05_v3	694242	699028	Pf3D7_05_v3	PF3D7_0516700	ubiquitin carboxyl-terminal hydrolase 2, putative	-0.106904	0.054578	-0.103761	0.071953	0.022524	0.01792	-0.052642	0.021177	0.008387	-0.171361	-0.020401	0.008387
Pf3D7_05_v3	699870	707506	Pf3D7_05_v3	PF3D7_0516800	AP2 domain transcription factor AP2-O2, putative	-0.10252	-0.097968	-0.091384	-0.124629	-0.098633	-0.050731	-0.083334	-0.079979	-0.069154	-0.069119	-0.135326	-0.069154
Pf3D7_05_v3	712512	714022	Pf3D7_05_v3	PF3D7_0516900	60S ribosomal protein L2	-0.041258	-0.025269	-0.00872	-0.027282	-0.035278	-0.00326	0.013119	-0.003249	0.011464	-0.028051	-0.007076	0.011464
Pf3D7_05_v3	715515	716925	Pf3D7_05_v3	PF3D7_0517000	60S ribosomal protein L12, putative	0.02857	0.010955	-0.070118	-0.051899	-0.049264	0.003299	-0.014043	0.014104	-0.009066	0.000173	-0.030224	-0.009066
Pf3D7_05_v3	718175	720105	Pf3D7_05_v3	PF3D7_0517100	conserved protein, unknown function	-0.009572	-0.015879	-0.076542	-0.017879	-0.017559	-0.028395	0.006328	0.020816	-0.057595	-0.100664	-0.06489	-0.057595
Pf3D7_05_v3	720493	722891	Pf3D7_05_v3	PF3D7_0517200	conserved Plasmodium protein, unknown function	0.010362	-0.012676	0.047322	0.038144	0.062778	0.071035	0.12394	0.098867	0.077572	-0.161723	0.064932	0.077572
Pf3D7_05_v3	724431	726001	Pf3D7_05_v3	PF3D7_0517300	serine/arginine-rich splicing factor 1	-0.01973	0.019974	-0.003478	0.037448	0.035902	-0.009921	-0.013404	0.014161	0.034597	-0.048437	-0.020467	0.034597
Pf3D7_05_v3	731157	735412	Pf3D7_05_v3	PF3D7_0517400	FACT complex subunit SPT16, putative	-0.009189	-0.043756	-0.023485	-0.040714	-0.057874	-0.097349	-0.000341	-0.038258	-0.02488	-0.154241	0.020039	-0.02488
Pf3D7_05_v3	735637	738650	Pf3D7_05_v3	PF3D7_0517500	UTP--glucose-1-phosphate uridylyltransferase, putative	-0.030681	0.007787	-0.054118	-0.021738	-0.019143	-0.051239	0.029358	-0.002303	-0.082617	-0.005365	-0.123938	-0.082617
Pf3D7_05_v3	739906	741284	Pf3D7_05_v3	PF3D7_0517600	F-actin-capping protein subunit beta, putative	0.024654	0.025581	0.021035	0.032465	0.020508	-0.020605	0.039347	0.083552	0.064021	-0.126401	0.053777	0.064021
Pf3D7_05_v3	742929	745563	Pf3D7_05_v3	PF3D7_0517700	eukaryotic translation initiation factor 3 subunit B, putative	-0.014946	-0.004135	-0.011724	-0.035813	-0.044115	-0.025329	0.018797	0.020444	-0.026049	0.020621	-0.011871	-0.026049
Pf3D7_05_v3	745564	746884	Pf3D7_05_v3	PF3D7_0517800	apicortin, putative	-0.083297	-0.074244	-0.13819	-0.035724	-0.029105	-0.056787	-0.008769	-0.060011	-0.017277	-0.066146	-0.04769	-0.017277
Pf3D7_05_v3	747545	749927	Pf3D7_05_v3	PF3D7_0517900	zinc finger protein, putative	-0.122139	0.029486	-0.012881	-0.061606	-0.03344	0.009129	-0.036159	-0.029369	0.076078	0.079204	0.018049	0.076078
Pf3D7_05_v3	750411	752685	Pf3D7_05_v3	PF3D7_0518000	NOSIP domain-containing protein, putative	0.013251	-0.017673	-0.005485	-0.02472	0.014206	-0.004218	-0.008219	-0.006219	-0.055942	-0.059181	-0.02142	-0.055942
Pf3D7_05_v3	753048	757794	Pf3D7_05_v3	PF3D7_0518100	protein AMR2	0.084561	0.092499	0.050894	0.114967	0.053412	0.073014	0.046701	0.030792	0.072063	0.14088	0.066877	0.072063
Pf3D7_05_v3	758253	759148	Pf3D7_05_v3	PF3D7_0518200	SWIB/MDM2 domain-containing protein	0.03233	-0.010217	0.025771	0.000889	0.052574	-0.020126	0.043605	0.014762	0.028251	0.039984	-0.018312	0.028251
Pf3D7_05_v3	759581	761248	Pf3D7_05_v3	PF3D7_0518300	proteasome subunit beta type-1, putative	0.000148	-0.122148	-0.086663	-0.062208	-0.036668	-0.062723	-0.010981	-0.019141	-0.004177	-0.109085	-0.035598	-0.004177
Pf3D7_05_v3	761853	763042	Pf3D7_05_v3	PF3D7_0518400	cyclin, putative	0.027048	0.009574	-0.043803	0.0185	0.072795	-0.005829	0.031337	0.006076	0.006401	0.031207	-0.013301	0.006401
Pf3D7_05_v3	763282	767153	Pf3D7_05_v3	PF3D7_0518500	ATP-dependent RNA helicase DDX23, putative	0.023715	0.11957	0.018693	0.04259	-0.015318	-0.078205	-0.050673	0.003539	-0.000174	-0.061341	-0.050592	-0.000174
Pf3D7_05_v3	769060	773390	Pf3D7_05_v3	PF3D7_0518600	WD repeat-containing protein 26, putative	-0.020864	-0.038011	-0.089472	0.009116	-0.046529	-0.052511	-0.006103	-0.060525	-0.033721	0.039866	0.014713	-0.033721
Pf3D7_05_v3	773825	780688	Pf3D7_05_v3	PF3D7_0518700	mRNA-binding protein PUF1	0.02728	0.060357	-0.052904	-0.030376	0.07103	-0.011552	0.000576	0.070961	-0.020327	0.060154	-0.043309	-0.020327
Pf3D7_05_v3	783388	785241	Pf3D7_05_v3	PF3D7_0518800	secreted ookinete protein, putative	-0.084538	-0.072615	-0.021029	-0.026545	-0.054925	-0.059858	-0.006211	-0.027885	-0.027527	0.00431	-0.034806	-0.027527
Pf3D7_05_v3	785414	786815	Pf3D7_05_v3	PF3D7_0518900	conserved protein, unknown function	-0.031229	-0.044556	-0.055442	-0.070534	-0.062171	-0.095566	-0.022094	-0.044418	-0.065692	-0.054328	-0.067322	-0.065692
Pf3D7_05_v3	788349	789730	Pf3D7_05_v3	PF3D7_0519000	histone RNA hairpin-binding protein, putative	-0.065535	-0.031891	-0.079775	-0.114241	-0.046484	-0.047578	-0.020867	-0.030097	-0.026687	-0.052771	-0.028736	-0.026687
Pf3D7_05_v3	790149	791023	Pf3D7_05_v3	PF3D7_0519100	50S ribosomal protein L14, mitochondrial, putative	-0.037463	0.022752	-0.009533	-0.043278	0.028017	-0.008416	0.047056	0.016997	-0.09159	-0.044831	-0.079083	-0.09159
Pf3D7_05_v3	791469	793186	Pf3D7_05_v3	PF3D7_0519200	V-type proton ATPase 16 kDa proteolipid subunit	-0.044114	-0.034356	-0.035823	-0.083029	-0.050041	-0.068496	-0.054827	-0.078783	-0.090367	-0.040163	-0.168441	-0.090367
Pf3D7_05_v3	795277	797723	Pf3D7_05_v3	PF3D7_0519300	protoheme IX farnesyltransferase, putative	-0.059015	-0.058226	-0.067162	-0.141734	-0.029212	-0.003869	-0.075242	-0.030293	-0.159057	-0.20749	-0.151555	-0.159057
Pf3D7_05_v3	797786	799025	Pf3D7_05_v3	PF3D7_0519400	40S ribosomal protein S24	-0.110928	-0.059432	-0.131122	-0.156425	-0.0483	-0.132187	-0.034547	-0.100308	-0.111368	-0.062718	-0.140311	-0.111368
Pf3D7_05_v3	801200	809377	Pf3D7_05_v3	PF3D7_0519500	CCR4 domain-containing protein 1, putative	0.016732	-0.034133	0.079995	0.123554	0.06659	0.184848	0.125626	0.029175	0.083141	0.1051	0.057268	0.083141
Pf3D7_05_v3	812398	815165	Pf3D7_05_v3	PF3D7_0519600	zinc finger protein, putative	-0.062223	-0.06151	-0.002752	-0.066539	-0.048736	-0.070693	0.002884	-0.021823	-0.038088	-0.101293	-0.076519	-0.038088
Pf3D7_05_v3	816816	819389	Pf3D7_05_v3	PF3D7_0519700	FoP domain-containing protein, putative	0.034744	-0.110032	-0.076561	-0.021055	-0.013013	-0.08206	-0.071708	-0.107242	0.067726	-0.10964	-0.059371	0.067726
Pf3D7_05_v3	820469	823158	Pf3D7_05_v3	PF3D7_0519800	EELM2 domain-containing protein, putative	0.036263	-0.013027	0.007576	-0.016898	-0.005196	0.0078	-0.003233	0.008765	-0.010227	-0.023706	0.031785	-0.010227
Pf3D7_05_v3	825585	827662	Pf3D7_05_v3	PF3D7_0519900	conserved protein, unknown function	0.13751	0.093885	0.054112	-0.04303	0.091304	0.015142	0.035125	0.10581	0.058382	0.050599	0.023432	0.058382
Pf3D7_05_v3	828703	830133	Pf3D7_05_v3	PF3D7_0520000	40S ribosomal protein S9, putative	0.053446	0.026187	-0.009511	-0.069884	-0.008693	-0.039586	0.020884	0.02975	0.047223	0.002332	-0.072842	0.047223
Pf3D7_05_v3	831367	834593	Pf3D7_05_v3	PF3D7_0520100	protein phosphatase PPM9, putative	-0.059663	-0.057946	-0.040282	-0.051222	-0.033363	-0.075737	-0.0296	-0.038649	-0.036468	-0.039058	-0.068992	-0.036468
Pf3D7_05_v3	835064	837657	Pf3D7_05_v3	PF3D7_0520200	mediator of RNA polymerase II transcription subunit 17, putative	0.053329	0.024082	-0.055547	-0.007388	-0.035012	-0.046603	0.036706	-0.022469	-0.017664	-0.156548	-0.060928	-0.017664
Pf3D7_05_v3	838178	839333	Pf3D7_05_v3	PF3D7_0520300	U6 snRNA-associated Sm-like protein LSm2, putative	0.081545	-0.111065	0.050886	0.066092	0.020469	0.027172	0.024105	0.020813	-0.057277	-0.123219	-0.027534	-0.057277
Pf3D7_05_v3	839405	840810	Pf3D7_05_v3	PF3D7_0520400	single-stranded DNA-binding protein, putative	0.005596	0.04188	0.001893	0.034596	0.059714	0.039789	0.07975	0.071243	0.053137	0.093186	0.102665	0.053137
Pf3D7_05_v3	841473	842905	Pf3D7_05_v3	PF3D7_0520500	phosphomethylpyrimidine kinase, putative	0.016285	0.031187	0.001511	0.047012	0.023169	-0.030548	0.023516	-0.000504	-0.054313	0.031238	0.003272	-0.054313
Pf3D7_05_v3	843336	845067	Pf3D7_05_v3	PF3D7_0520600	bis(5'-nucleosyl)-tetraphosphatase [asymmetrical]	0.051565	-0.042641	0.073545	0.076713	0.044763	0.018334	-0.033125	0.03346	-0.073873	-0.137952	-0.030678	-0.073873
Pf3D7_05_v3	845593	849017	Pf3D7_05_v3	PF3D7_0520700	CDC73 domain-containing protein, putative	0.008133	-0.012293	0.028422	0.068415	0.036506	0.049318	0.048601	0.102184	-0.027548	0.03225	-0.008041	-0.027548
Pf3D7_05_v3	849612	856276	Pf3D7_05_v3	PF3D7_0520800	conserved protein, unknown function	-0.021941	-0.118608	-0.041002	-0.079805	0.012091	-0.039904	0.004349	0.007299	-0.0787	-0.232357	-0.048472	-0.0787
Pf3D7_05_v3	856788	858727	Pf3D7_05_v3	PF3D7_0520900	adenosylhomocysteinase	-0.011269	-0.075683	-0.075798	-0.014078	-0.009901	-0.005211	0.008442	-0.028284	-0.048605	-0.152761	-0.006787	-0.048605
Pf3D7_05_v3	859123	861313	Pf3D7_05_v3	PF3D7_0521000	conserved Plasmodium protein, unknown function	-0.004233	-0.033296	0.021304	0.008589	0.038153	0.047317	0.042988	0.061189	0.01132	0.041963	-0.002658	0.01132
Pf3D7_05_v3	861680	867833	Pf3D7_05_v3	PF3D7_0521100	conserved Plasmodium protein, unknown function	0.007498	-0.056504	0.02405	0.012019	-0.025294	-0.029542	-0.081103	0.006092	0.010328	-0.014281	0.03126	0.010328
Pf3D7_05_v3	868642	870031	Pf3D7_05_v3	PF3D7_0521200	conserved protein, unknown function	-0.046094	-0.024305	-0.054649	-0.012761	0.018914	0.031305	0.034553	0.014605	-0.02829	-0.101565	-0.065477	-0.02829
Pf3D7_05_v3	870032	874820	Pf3D7_05_v3	PF3D7_0521300	zinc finger protein, putative	-0.021653	-0.054856	-0.050324	-0.050754	-0.052785	-0.090834	-0.040843	-0.045897	-0.069818	-0.040976	-0.028372	-0.069818
Pf3D7_05_v3	875623	877811	Pf3D7_05_v3	PF3D7_0521400	conserved protein, unknown function	-0.044252	-0.024314	-0.023036	0.085596	-0.029874	-0.069264	-0.024444	-0.030502	0.013154	-0.065324	0.024053	0.013154
Pf3D7_05_v3	877818	879913	Pf3D7_05_v3	PF3D7_0521500	ribosomal large subunit pseudouridylate synthase, putative	-0.018082	-0.030349	-0.042236	0.025312	0.013394	-0.010158	0.022552	0.005527	0.020703	-0.052184	0.036286	0.020703
Pf3D7_05_v3	882126	885151	Pf3D7_05_v3	PF3D7_0521700	ATP-dependent RNA helicase DDX1, putative	-0.111073	-0.0558	-0.147262	-0.122397	-0.106417	-0.069718	-0.042903	-0.10077	-0.094656	-0.073895	-0.019508	-0.094656
Pf3D7_05_v3	885464	888444	Pf3D7_05_v3	PF3D7_0521800	AFG1-like ATPase, putative	-0.00963	0.022244	0.003982	-0.019786	0.009444	-0.036187	0.04471	-0.005068	-0.029212	0.082747	-0.020159	-0.029212
Pf3D7_05_v3	888445	895394	Pf3D7_05_v3	PF3D7_0521900	conserved Plasmodium protein, unknown function	0.024713	0.008239	0.012721	-0.020137	0.005292	0.020941	0.008774	0.038138	-0.017506	0.075389	0.031853	-0.017506
Pf3D7_05_v3	895768	897190	Pf3D7_05_v3	PF3D7_0522000	conserved Plasmodium protein, unknown function	0.011554	-0.0112	0.006115	0.024763	-0.054477	-0.00417	-0.048962	-0.055744	-0.033039	0.0313	-0.007153	-0.033039
Pf3D7_05_v3	897215	900006	Pf3D7_05_v3	PF3D7_0522100	conserved Plasmodium protein, unknown function	-0.013998	-0.051233	-0.167055	-0.085477	-0.054836	-0.074502	-0.029466	-0.000779	-0.086749	-0.04041	-0.060161	-0.086749
Pf3D7_05_v3	901164	902393	Pf3D7_05_v3	PF3D7_0522200	transcription initiation factor TFIID subunit 10, putative	-0.016776	-0.122104	-0.031984	-0.042755	0.014582	0.002764	-0.143769	-0.097874	-0.051114	-0.07316	0.025848	-0.051114
Pf3D7_05_v3	902394	905094	Pf3D7_05_v3	PF3D7_0522300	18S rRNA (guanine-N(7))-methyltransferase, putative	-0.061513	-0.047604	-0.107471	-0.063105	-0.024754	-0.062787	0.02744	0.00809	-0.069103	-0.017573	-0.034863	-0.069103
Pf3D7_05_v3	907587	936565	Pf3D7_05_v3	PF3D7_0522400	conserved Plasmodium protein, unknown function	0.000464	0.052176	0.098087	0.047314	0.069833	0.059036	0.051533	0.076622	0.117821	0.101648	0.057026	0.117821
Pf3D7_05_v3	936981	938287	Pf3D7_05_v3	PF3D7_0522500	50S ribosomal protein L17, apicoplast, putative	0.000491	-0.033772	-0.064337	-0.00123	-0.016193	0.002091	-0.02288	0.017506	0.016817	-0.060931	-0.002259	0.016817
Pf3D7_05_v3	939999	941950	Pf3D7_05_v3	PF3D7_0522600	inner membrane complex protein	0.033714	0.014168	0.042034	0.038561	0.03304	-0.00171	-0.013487	-0.006992	0.070624	0.000475	0.024701	0.070624
Pf3D7_05_v3	942517	944028	Pf3D7_05_v3	PF3D7_0522700	iron-sulfur assembly protein	0.008365	-0.07697	-0.091095	-0.036477	-0.006812	-0.042956	-0.007731	0.014253	-0.01418	0.003214	0.007381	-0.01418
Pf3D7_05_v3	944029	945181	Pf3D7_05_v3	PF3D7_0522800	pre-mRNA-splicing factor BUD31, putative	-0.045347	0.069195	-0.019512	-0.014657	-0.012984	-0.041033	-0.069249	-0.05739	0.009901	0.122449	0.086812	0.009901
Pf3D7_05_v3	948701	953859	Pf3D7_05_v3	PF3D7_0522900	zinc finger protein, putative	0.011506	-0.061258	0.048224	-0.003331	-0.023482	-0.093262	0.075863	-0.012158	0.021718	0.119812	-0.114262	0.021718
Pf3D7_05_v3	957640	962399	Pf3D7_05_v3	PF3D7_0523000	multidrug resistance protein 1	-0.012244	0.023016	-0.062639	-0.018263	-0.026692	-0.015741	0.02424	0.049574	0.017001	0.018254	-0.015309	0.017001
Pf3D7_05_v3	962977	965294	Pf3D7_05_v3	PF3D7_0523100	mitochondrial-processing peptidase subunit alpha, putative	0.0068	0.001704	-0.047239	-0.011194	0.038447	-0.006968	0.014533	0.017327	0.057485	0.061441	0.004143	0.057485
Pf3D7_05_v3	965873	969987	Pf3D7_05_v3	PF3D7_0523200	heptatricopeptide repeat-containing protein, putative	0.016107	-0.010981	-0.071739	-0.001804	-0.051354	-0.061198	-0.063	-0.021247	-0.01113	-0.033488	-0.073253	-0.01113
Pf3D7_05_v3	970016	971212	Pf3D7_05_v3	PF3D7_0523300	cytochrome c oxidase subunit ApiCOX18, putative	0.019452	-0.056832	-0.062964	0.019439	-0.033147	-0.014918	0.006111	-0.00125	0.058864	-0.114457	-0.014673	0.058864
Pf3D7_05_v3	973268	976126	Pf3D7_05_v3	PF3D7_0523400	DnaJ protein, putative	0.053957	0.018012	0.187633	0.104662	0.020526	0.139034	0.061427	0.036161	0.109045	0.263506	0.110675	0.109045
Pf3D7_05_v3	976440	978065	Pf3D7_05_v3	PF3D7_0523500	dynein light chain Tctex-type, putative	-0.004837	0.010196	-0.002877	-0.020648	0.004373	-0.037964	0.013917	-0.02667	-0.028227	0.049948	-0.009956	-0.028227
Pf3D7_05_v3	978415	980120	Pf3D7_05_v3	PF3D7_0523600	conserved protein, unknown function	-0.111013	-0.092919	-0.021996	-0.051442	-0.031027	-0.102332	-0.105516	-0.116495	-0.14838	-0.371421	-0.051271	-0.14838
Pf3D7_05_v3	980504	985604	Pf3D7_05_v3	PF3D7_0523700	conserved Plasmodium membrane protein, unknown function	0.080221	0.03527	0.026387	-0.016162	-0.015137	-0.047901	-0.108231	0.001906	-0.00352	0.075076	-0.03657	-0.00352
Pf3D7_05_v3	989755	992309	Pf3D7_05_v3	PF3D7_0523800	divalent metal transporter, putative	-0.006557	-0.030057	0.038352	-0.001225	0.050911	-0.005345	-0.003899	0.013607	-0.018679	-0.008018	-0.038833	-0.018679
Pf3D7_05_v3	993183	994857	Pf3D7_05_v3	PF3D7_0523900	MerC domain-containing protein, putative	-0.010056	0.021684	-0.018827	0.010745	0.01255	-0.019939	-0.002133	0.048544	-0.007698	0.010213	0.001207	-0.007698
Pf3D7_05_v3	998503	1002374	Pf3D7_05_v3	PF3D7_0524000	karyopherin beta	-0.008948	-0.12421	-0.001051	-0.033479	-0.062963	-0.020409	-0.112351	-0.087788	-0.097304	-0.112703	0.026037	-0.097304
Pf3D7_05_v3	1003987	1008358	Pf3D7_05_v3	PF3D7_0524100	conserved Plasmodium protein, unknown function	-0.033605	-0.014048	-0.031029	-0.061084	-0.027718	-0.072296	-0.020247	-0.033114	-0.077133	-0.029186	-0.086877	-0.077133
Pf3D7_05_v3	1008386	1009654	Pf3D7_05_v3	PF3D7_0524200	conserved Plasmodium membrane protein, unknown function	0.022992	0.013455	-0.039387	0.008615	0.020224	-0.040032	-0.044443	0.030469	-0.007099	-0.161213	-0.044745	-0.007099
Pf3D7_05_v3	1010701	1012421	Pf3D7_05_v3	PF3D7_0524300	conserved Plasmodium protein, unknown function	-0.017118	0.007873	-0.000577	-0.003923	0.036439	0.082333	0.023421	0.072814	0.081166	0.137211	0.075896	0.081166
Pf3D7_05_v3	1013203	1014800	Pf3D7_05_v3	PF3D7_0524400	ribosome-interacting GTPase 1, putative	0.094679	0.049612	-0.010919	-0.034333	0.038035	0.019099	0.085388	0.059216	-0.023409	0.011677	0.036109	-0.023409
Pf3D7_05_v3	1017559	1018832	Pf3D7_05_v3	PF3D7_0524600	50S ribosomal protein L12, apicoplast, putative	-0.04451	-0.072367	-0.076765	-0.071642	-0.007149	-0.015872	-0.107158	-0.025298	-0.108361	-0.19144	-0.020398	-0.108361
Pf3D7_05_v3	1019335	1020152	Pf3D7_05_v3	PF3D7_0524700	mitochondrial import receptor subunit TOM22, putative	0.045343	-0.00543	0.067744	0.022778	-0.011221	-0.029456	0.044606	0.085309	0.009676	-0.00673	0.059667	0.009676
Pf3D7_05_v3	1021158	1024557	Pf3D7_05_v3	PF3D7_0524800	ubiquitin fusion degradation protein 1, putative	-0.005557	-0.013989	-0.069349	-0.109796	-0.024464	-0.107682	-0.124304	-0.031741	0.093671	0.070167	-0.006883	0.093671
Pf3D7_05_v3	1027146	1030612	Pf3D7_05_v3	PF3D7_0524900	S-adenosyl-L-methionine-dependent tRNA 4-demethylwyosine synthase, putative	-0.018992	-0.013085	-0.084576	-0.06209	-0.065012	-0.059181	-0.062219	-0.000356	-0.047886	-0.149811	-0.046002	-0.047886
Pf3D7_05_v3	1035979	1038593	Pf3D7_05_v3	PF3D7_0525000	zinc finger protein, putative	0.015894	0.02893	0.016849	0.019242	0.021545	-0.036154	0.041119	0.008856	0.026922	0.041321	0.026473	0.026922
Pf3D7_05_v3	1041495	1044016	Pf3D7_05_v3	PF3D7_0525100	acyl-CoA synthetase	-0.06347	-0.028911	-0.066959	-0.108278	-0.116473	-0.103121	-0.075289	-0.067572	-0.078774	-0.008437	-0.055439	-0.078774
Pf3D7_05_v3	1045212	1051503	Pf3D7_05_v3	PF3D7_0525200	structural maintenance of chromosomes protein 6, putative	-0.037205	-0.062318	-0.006053	-0.023871	0.005764	-0.039231	-0.004676	-0.00615	-0.002571	-0.093174	-0.038239	-0.002571
Pf3D7_05_v3	1052218	1054163	Pf3D7_05_v3	PF3D7_0525300	conserved protein, unknown function	-0.041139	-0.081746	-0.091543	-0.07575	-0.022261	-0.039375	-0.056434	-0.055979	-0.030127	-0.029751	-0.034504	-0.030127
Pf3D7_05_v3	1057401	1059304	Pf3D7_05_v3	PF3D7_0525400	7-helix-1 protein	0.014568	-0.035137	-0.105523	-0.049202	-0.101905	-0.063398	-0.121446	-0.083693	-0.038973	-0.10986	-0.103636	-0.038973
Pf3D7_05_v3	1059668	1065759	Pf3D7_05_v3	PF3D7_0525500	WD repeat-containing protein, putative	0.024455	-0.068521	-0.081305	0.000463	-0.005982	-0.120676	-0.012856	-0.019875	-0.015006	-0.086245	-0.054618	-0.015006
Pf3D7_05_v3	1066276	1067962	Pf3D7_05_v3	PF3D7_0525600	RNA methyltransferase, putative	0.022181	-0.052299	-0.013385	0.024423	0.03988	-0.005983	-0.008139	0.001335	-0.095178	-0.175273	-0.083366	-0.095178
Pf3D7_05_v3	1068266	1069535	Pf3D7_05_v3	PF3D7_0525700	conserved protein, unknown function	-0.023641	-0.032043	-0.061227	-0.044406	-0.078425	0.052226	-0.033798	-0.049172	-0.038736	-0.083932	-0.085272	-0.038736
Pf3D7_05_v3	1070997	1072399	Pf3D7_05_v3	PF3D7_0525800	inner membrane complex protein 1g, putative	0.037163	0.036845	0.066431	0.044934	-0.068682	0.021559	-0.111496	-0.076206	-0.060392	0.011278	-0.053655	-0.060392
Pf3D7_05_v3	1073396	1075778	Pf3D7_05_v3	PF3D7_0525900	NIMA related kinase 2	0.0926	-0.014357	-0.066832	0.004013	-0.016332	-0.03779	-0.059802	0.047635	0.015503	-0.071827	0.009052	0.015503
Pf3D7_05_v3	1075779	1078583	Pf3D7_05_v3	PF3D7_0526000	RAP protein, putative	0.127855	0.047601	0.121925	0.084662	0.072131	0.087603	0.081905	0.012038	0.078852	0.051667	0.050916	0.078852
Pf3D7_05_v3	1079529	1081258	Pf3D7_05_v3	PF3D7_0526100	conserved Plasmodium membrane protein, unknown function	0.014355	-0.01842	-0.00082	0.025989	-0.035947	-0.06715	-0.040168	-0.013263	-0.018194	-0.145965	-0.033856	-0.018194
Pf3D7_05_v3	1081308	1084066	Pf3D7_05_v3	PF3D7_0526200	ADP-ribosylation factor GTPase-activating protein, putative	0.02648	0.003447	-0.088664	-0.00664	-0.041985	0.042286	-0.07048	0.088316	-0.02529	-0.101604	-0.070927	-0.02529
Pf3D7_05_v3	1085373	1086844	Pf3D7_05_v3	PF3D7_0526300	WD repeat-containing protein 55, putative	0.029141	-0.024296	0.000924	0.08327	0.06857	0.042558	-0.009997	0.047427	0.090138	0.054916	0.0542	0.090138
Pf3D7_05_v3	1088173	1089758	Pf3D7_05_v3	PF3D7_0526400	conserved Plasmodium protein, unknown function	0.016069	-0.004033	-0.070056	-0.048178	-0.079493	-0.121954	-0.044088	-0.035275	-0.067095	-0.058364	-0.095707	-0.067095
Pf3D7_05_v3	1090680	1095334	Pf3D7_05_v3	PF3D7_0526500	conserved Plasmodium protein, unknown function	-0.015719	-0.076269	0.055905	0.047052	0.006841	0.021313	-0.019251	0.00535	-0.017202	-0.044978	0.069287	-0.017202
Pf3D7_05_v3	1100953	1115027	Pf3D7_05_v3	PF3D7_0526600	conserved Plasmodium protein, unknown function	0.011891	0.014548	0.048481	0.030051	0.021764	0.001296	0.003943	0.055867	0.059189	-0.042357	0.042772	0.059189
Pf3D7_05_v3	1117011	1119901	Pf3D7_05_v3	PF3D7_0526700	conserved protein, unknown function	0.056387	0.052622	0.034943	0.071328	0.0231	0.013633	-0.022395	0.020474	0.065974	0.0377	0.066756	0.065974
Pf3D7_05_v3	1120454	1122060	Pf3D7_05_v3	PF3D7_0526800	conserved Plasmodium protein, unknown function	-0.027099	0.018054	-0.040092	-0.08462	0.002873	-0.04921	0.021757	-0.001273	0.007457	0.085378	0.002564	0.007457
Pf3D7_05_v3	1123360	1124845	Pf3D7_05_v3	PF3D7_0526900	transmembrane emp24 domain-containing protein, putative	-0.000961	0.043168	0.060829	-0.036539	0.005275	-0.01399	0.075388	0.085295	-0.015067	0.033001	-0.00197	-0.015067
Pf3D7_05_v3	1124849	1128396	Pf3D7_05_v3	PF3D7_0527000	DNA replication licensing factor MCM3, putative	0.041055	0.029062	0.103586	0.041126	0.001554	-0.003518	-0.13589	-0.007201	0.057524	0.120129	0.031398	0.057524
Pf3D7_05_v3	1129709	1131004	Pf3D7_05_v3	PF3D7_0527100	ubiquitin-conjugating enzyme E2 N, putative	-0.02456	0.025719	0.143234	0.02017	0.032921	0.042887	0.031445	0.021666	0.013762	-0.026902	0.002067	0.013762
Pf3D7_05_v3	1132687	1135104	Pf3D7_05_v3	PF3D7_0527200	ubiquitin carboxyl-terminal hydrolase 14	0.097035	0.138622	0.143162	0.116814	0.117144	0.100889	0.048689	0.171452	0.119013	0.174513	0.137028	0.119013
Pf3D7_05_v3	1135726	1138120	Pf3D7_05_v3	PF3D7_0527300	methionine aminopeptidase 1a, putative	-0.060872	-0.094932	-0.080075	-0.03444	0.022198	-0.085336	-0.059224	-0.083715	-0.030646	-0.078901	-0.074855	-0.030646
Pf3D7_05_v3	1140377	1141404	Pf3D7_05_v3	PF3D7_0527400	conserved Plasmodium protein, unknown function	-0.048548	-0.058143	-0.112283	-0.109207	0.026925	-0.008031	0.027183	-0.027911	-0.091691	0.009947	-0.121646	-0.091691
Pf3D7_05_v3	1143368	1145608	Pf3D7_05_v3	PF3D7_0527500	Hsc70-interacting protein	-0.100784	-0.062912	-0.103298	-0.11764	-0.113624	-0.046344	-0.073238	-0.066849	-0.111848	0.022517	-0.142749	-0.111848
Pf3D7_05_v3	1145609	1149060	Pf3D7_05_v3	PF3D7_0527600	conserved Plasmodium protein, unknown function	0.124075	0.092749	0.07077	0.119804	0.134681	0.099748	0.015498	0.073394	0.177378	0.124529	0.189644	0.177378
Pf3D7_05_v3	1153426	1155923	Pf3D7_05_v3	PF3D7_0527900	ATP-dependent RNA helicase DDX41, putative	-0.099041	-0.035895	-0.04492	-0.086347	0.006354	-0.090552	-0.060699	-0.088795	0.016943	0.016084	-0.054101	0.016943
Pf3D7_05_v3	1157590	1161803	Pf3D7_05_v3	PF3D7_0528100	AP-1 complex subunit beta, putative	-0.026184	-0.060492	0.005692	-0.008137	0.031376	-0.005995	-0.011349	-0.003246	0.054719	-0.008619	0.039203	0.054719
Pf3D7_05_v3	1163158	1165322	Pf3D7_05_v3	PF3D7_0528200	eukaryotic translation initiation factor 3 subunit E, putative	-0.028205	0.018374	0.009637	0.031462	0.02896	0.065248	0.052207	0.025518	0.057648	0.113841	0.041852	0.057648
Pf3D7_05_v3	1166270	1168260	Pf3D7_05_v3	PF3D7_0528300	conserved protein, unknown function	-0.101279	-0.042903	-0.069709	-0.10895	-0.026303	-0.083588	-0.099438	-0.069584	-0.01454	-0.081939	-0.067565	-0.01454
Pf3D7_05_v3	1171409	1174140	Pf3D7_05_v3	PF3D7_0528400	palmitoyltransferase DHHC7	-0.003552	0.01409	-0.009033	-0.00604	0.021834	-0.045347	-0.041019	0.002488	0.012028	0.002257	-0.012226	0.012028
Pf3D7_05_v3	1174657	1177536	Pf3D7_05_v3	PF3D7_0528500	F-actin-capping protein subunit alpha, putative	0.065764	0.001603	0.065696	0.031322	0.064567	0.037705	0.050838	0.026572	0.071377	-0.041592	0.014463	0.071377
Pf3D7_05_v3	1178026	1179140	Pf3D7_05_v3	PF3D7_0528700	peptidyl-prolyl cis-trans isomerase	-0.006312	0.033644	0.001511	0.047704	-0.015826	0.026063	-0.015109	-0.008447	0.06733	0.109066	0.086891	0.06733
Pf3D7_05_v3	1180175	1182288	Pf3D7_05_v3	PF3D7_0528800	nucleolar preribosomal GTPase, putative	-0.037747	-0.024691	0.049213	-0.068961	-0.040716	-0.020378	0.026936	0.069414	-0.001337	-0.110798	0.001503	-0.001337
Pf3D7_05_v3	1183666	1185889	Pf3D7_05_v3	PF3D7_0528900	conserved protein, unknown function	0.033701	-0.001023	-0.04264	-0.028066	0.061015	-0.027483	-0.036044	0.016468	0.01544	0.062329	-0.00341	0.01544
Pf3D7_05_v3	1186537	1189196	Pf3D7_05_v3	PF3D7_0529000	conserved Plasmodium protein, unknown function	0.044104	0.029282	-0.032704	-0.00725	0.050257	0.096764	-0.021132	0.039511	0.047822	-0.019324	0.057458	0.047822
Pf3D7_05_v3	1190750	1191932	Pf3D7_05_v3	PF3D7_0529100	thioredoxin-like protein, putative	0.045443	0.074132	0.005812	-0.047066	0.06198	0.043404	0.026394	0.009563	0.009699	0.002891	0.009547	0.009699
Pf3D7_05_v3	1192723	1195582	Pf3D7_05_v3	PF3D7_0529200	sugar transporter, putative	0.047823	0.1287	-0.026656	0.04061	0.024742	0.040427	0.096544	0.054221	0.084913	0.072421	0.072568	0.084913
Pf3D7_05_v3	1196065	1197639	Pf3D7_05_v3	PF3D7_0529300	apicoplast TIC22 protein	0.009736	-0.025692	-0.036505	-0.026973	-0.048984	-0.076306	-0.030578	0.053077	-0.03685	0.044752	0.013485	-0.03685
Pf3D7_05_v3	1198915	1205437	Pf3D7_05_v3	PF3D7_0529400	conserved Plasmodium protein, unknown function	0.045107	-0.022126	-0.025082	-0.022509	-0.017157	-0.054906	-0.017536	0.023531	-0.069353	-0.049969	0.05808	-0.069353
Pf3D7_05_v3	1206223	1207929	Pf3D7_05_v3	PF3D7_0529500	cell cycle regulator protein, putative	0.070199	0.060042	-0.007141	-0.03081	0.036094	0.008217	0.010614	0.050815	0.016543	0.061571	0.050595	0.016543
Pf3D7_05_v3	1208756	1212352	Pf3D7_05_v3	PF3D7_0529700	heptatricopeptide repeat-containing protein, putative	-0.003336	0.007789	0.052484	0.01586	0.003047	0.018349	0.005161	0.034296	0.088437	0.166792	0.123055	0.088437
Pf3D7_05_v3	1213283	1219626	Pf3D7_05_v3	PF3D7_0529800	conserved Plasmodium protein, unknown function	-0.017429	-0.05302	-0.010689	-0.048607	-0.022405	-0.040716	-0.010321	-0.100777	-0.009002	-0.07009	-0.014934	-0.009002
Pf3D7_05_v3	1220527	1222242	Pf3D7_05_v3	PF3D7_0529900	RING zinc finger protein, putative	0.006965	0.094357	0.058032	0.034492	0.063502	0.011604	0.070386	0.085143	0.071436	0.123429	0.077777	0.071436
Pf3D7_05_v3	1224348	1225141	Pf3D7_05_v3	PF3D7_0530000	conserved Plasmodium protein, unknown function	-0.049251	-0.051711	0.006603	-0.023419	0.034538	0.005485	0.020427	-0.066885	0.074318	0.229017	0.054736	0.074318
Pf3D7_05_v3	1226633	1228007	Pf3D7_05_v3	PF3D7_0530100	SNARE protein, putative	0.051204	-0.003698	0.008319	-0.094485	-0.023599	-0.094185	-0.076696	0.007733	-0.092198	-0.21775	-0.042641	-0.092198
Pf3D7_05_v3	1228827	1230901	Pf3D7_05_v3	PF3D7_0530200	phosphoenolpyruvate/phosphate translocator	0.07029	0.023452	0.06151	0.008121	0.083725	0.011213	-0.035612	0.052475	0.020099	0.070104	0.016666	0.020099
Pf3D7_05_v3	1233151	1238336	Pf3D7_05_v3	PF3D7_0530300	conserved Plasmodium membrane protein, unknown function	0.02369	-0.021746	0.014321	0.003192	0.010754	-0.038772	0.007115	0.004039	0.033856	0.035487	-0.001448	0.033856
Pf3D7_05_v3	1238383	1244237	Pf3D7_05_v3	PF3D7_0530400	conserved Plasmodium protein, unknown function	0.024116	-0.009628	0.044948	0.043591	0.049977	-0.005915	0.010647	-0.015017	0.038438	-0.028539	0.012737	0.038438
Pf3D7_05_v3	1244501	1248363	Pf3D7_05_v3	PF3D7_0530500	conserved Plasmodium membrane protein, unknown function	0.049431	-0.065941	0.044823	0.029841	0.013176	-0.041117	0.024816	-0.00376	-0.009896	-0.115589	0.000216	-0.009896
Pf3D7_05_v3	1248364	1250211	Pf3D7_05_v3	PF3D7_0530600	XAP-5 DNA binding protein, putative	0.021331	-0.008437	0.118204	0.071746	-0.006403	0.04146	0.036266	0.027223	0.125205	0.006713	0.06556	0.125205
Pf3D7_05_v3	1250487	1254440	Pf3D7_05_v3	PF3D7_0530700	conserved Plasmodium protein, unknown function	0.069989	0.051965	0.092098	0.064945	0.031248	0.033306	0.035121	0.052914	0.078375	0.107494	0.045094	0.078375
Pf3D7_05_v3	1254971	1257488	Pf3D7_05_v3	PF3D7_0530800	CPW-WPC family protein	0.036548	-0.019496	0.093423	0.056932	0.041013	-0.011436	0.017421	0.028275	0.084211	0.18922	0.022683	0.084211
Pf3D7_05_v3	1257489	1266000	Pf3D7_05_v3	PF3D7_0530900	formin 1	0.055797	0.031044	0.021335	-0.041289	0.008967	0.008633	0.012662	-0.005074	0.03878	0.044017	-0.006151	0.03878
Pf3D7_05_v3	1267160	1269789	Pf3D7_05_v3	PF3D7_0531000	SURF1 domain-containing protein, putative	0.087991	0.061197	0.07994	0.055177	0.055118	0.040125	0.089962	-0.009845	0.054111	0.023618	-0.04283	0.054111
Pf3D7_05_v3	1270138	1278734	Pf3D7_05_v3	PF3D7_0531100	conserved Plasmodium protein, unknown function	0.022493	-0.048351	-0.045923	-0.036374	-0.004195	-0.046035	-0.046285	0.000366	-0.046923	-0.087688	-0.063032	-0.046923
Pf3D7_05_v3	1279708	1280849	Pf3D7_05_v3	PF3D7_0531200	ribosomal protein S16, mitochondrial, putative	0.051756	0.118848	0.149229	0.175383	0.159197	0.103876	0.071372	0.127892	0.093108	0.221958	0.00942	0.093108
Pf3D7_05_v3	1281039	1282422	Pf3D7_05_v3	PF3D7_0531300	conserved Plasmodium protein, unknown function	-0.011585	-0.137743	-0.043874	-0.112802	-0.069394	-0.059493	-0.040213	-0.104387	-0.078741	-0.211462	-0.120628	-0.078741
Pf3D7_05_v3	1282423	1286356	Pf3D7_05_v3	PF3D7_0531400	conserved Plasmodium protein, unknown function	-0.057762	-0.03536	0.01237	-0.05149	-0.006829	-0.045099	-0.011136	-0.043842	0.046758	-0.044105	-0.012615	0.046758
Pf3D7_05_v3	1289455	1291692	Pf3D7_05_v3	PF3D7_0531600	18S ribosomal RNA	0.142789	0.096386	0.213929	0.069968	0.132034	0.132899	0.179815	0.116075	0.146024	0.103136	0.245714	0.146024
Pf3D7_05_v3	1292410	1296449	Pf3D7_05_v3	PF3D7_0532000	28S ribosomal RNA	0.114202	0.045803	0.243925	0.150608	0.015492	0.130241	-0.003178	0.097371	0.180869	-0.126671	0.199948	0.180869
Pf3D7_05_v3	1300974	1302019	Pf3D7_05_v3	PF3D7_0532100	early transcribed membrane protein 5	0.163038	0.002339	-0.032758	0.009635	0.048524	-0.077002	-0.118507	-0.024073	-0.061984	-0.252351	-0.06784	-0.061984
Pf3D7_05_v3	1303412	1304776	Pf3D7_05_v3	PF3D7_0532200	Plasmodium exported protein (PHISTc), unknown function	-0.041399	-0.184762	-0.19549	-0.093545	-0.073505	-0.107639	-0.149925	-0.108077	-0.114037	-0.090008	-0.152504	-0.114037
Pf3D7_05_v3	1308028	1310190	Pf3D7_05_v3	PF3D7_0532300	Plasmodium exported protein (PHISTb), unknown function	0.084563	-0.041608	-0.154229	-0.014639	-0.019057	-0.086556	-0.144064	-0.06064	-0.04928	-0.149506	-0.062862	-0.04928
Pf3D7_05_v3	1312221	1314404	Pf3D7_05_v3	PF3D7_0532400	lysine-rich membrane-associated PHISTb protein	0.072568	-0.139928	-0.17196	-0.049664	-0.057268	-0.162651	-0.088917	-0.076586	-0.133673	-0.205275	-0.070293	-0.133673
Pf3D7_05_v3	1318281	1319479	Pf3D7_05_v3	PF3D7_0532600	Plasmodium exported protein, unknown function	0.032534	-0.169242	-0.228693	-0.131005	-0.093655	-0.016192	-0.154261	-0.102662	0.082469	-0.310215	-0.015382	0.082469
Pf3D7_05_v3	1322150	1323499	Pf3D7_05_v3	PF3D7_0532700	erythrocyte membrane protein 1 (PfEMP1), pseudogene	-0.013299	-0.126718	-0.378474	-0.122769	-0.084313	-0.140831	-0.107885	-0.062414	-0.137529	-0.334076	-0.177904	-0.137529
Pf3D7_05_v3	1323989	1325277	Pf3D7_05_v3	PF3D7_0532800	stevor, pseudogene	0.128505	-0.173929	-0.224675	0.054825	0.001791	-0.142327	-0.160529	0.037711	0.029211	-0.186899	0.017804	0.029211
Pf3D7_05_v3	1325995	1327679	Pf3D7_05_v3	PF3D7_0532900	rifin	0.116413	-0.119626	-0.162709	0.055756	-0.002406	-0.03106	-0.095143	0.028203	0.175601	-0.139132	0.090426	0.175601
Pf3D7_05_v3	1329305	1331058	Pf3D7_05_v3	PF3D7_0533000	rifin, pseudogene	0.141158	-0.047106	-0.047642	0.133831	-0.010204	-0.014213	-0.080758	0.063183	0.048319	-0.208208	0.047828	0.048319
Pf3D7_05_v3	1333220	1343214	Pf3D7_05_v3	PF3D7_0533100	erythrocyte membrane protein 1 (PfEMP1), pseudogene	0.212334	0.064324	0.099632	0.166741	0.095358	0.061404	0.013503	0.10246	0.215321	0.052819	0.253928	0.215321
Pf3D7_06_v3	403	1682	Pf3D7_06_v3	PF3D7_0600100	erythrocyte membrane protein 1 (PfEMP1), pseudogene	-0.002166	-0.0126	0.335612	-0.04183	-0.044939	-0.031807	0.037247	-0.023713	0.209419	0.224953	0.159527	0.209419
Pf3D7_06_v3	3253	13085	Pf3D7_06_v3	PF3D7_0600200	erythrocyte membrane protein 1, PfEMP1	-0.15645	-0.053625	0.125924	-0.17933	-0.12018	-0.087491	-0.050213	-0.129	-0.008695	0.075617	-0.040263	-0.008695
Pf3D7_06_v3	14815	16660	Pf3D7_06_v3	PF3D7_0600300	rifin	-0.039496	-0.014	0.191312	-0.09538	-0.016891	-0.003156	-0.122819	-0.050657	0.092815	0.101716	0.113562	0.092815
Pf3D7_06_v3	18336	22971	Pf3D7_06_v3	PF3D7_0600400	erythrocyte membrane protein 1, PfEMP1	0.195173	0.166121	0.338355	0.22155	0.517689	0.264372	0.096002	0.110037	0.430001	0.238395	0.397273	0.430001
Pf3D7_06_v3	29368	31724	Pf3D7_06_v3	PF3D7_0600600	erythrocyte membrane protein 1 (PfEMP1), exon 2	0.051894	0.08522	0.387595	0.152694	0.530195	0.218499	0.059878	-0.00633	0.245141	0.103967	0.266029	0.245141
Pf3D7_06_v3	31725	33494	Pf3D7_06_v3	PF3D7_0600700	rifin	-0.090119	0.064695	0.324138	0.012975	0.081489	0.081714	0.078783	0.063737	0.316536	0.248381	0.263942	0.316536
Pf3D7_06_v3	35105	36845	Pf3D7_06_v3	PF3D7_0600800	rifin, pseudogene	0.003091	0.014398	-0.047923	-0.049558	-0.050135	0.036005	-0.007743	0.037948	-0.019776	0.077842	0.001767	-0.019776
Pf3D7_06_v3	70698	72185	Pf3D7_06_v3	PF3D7_0601700	Plasmodium exported protein (PHISTa), unknown function, pseudogene	0.026473	-0.11054	0.035256	0.114164	-0.039226	-0.117858	-0.076345	-0.010353	0.100491	-0.068239	0.104166	0.100491
Pf3D7_06_v3	77940	79034	Pf3D7_06_v3	PF3D7_0601900	conserved Plasmodium protein, unknown function	0.030479	0.027628	0.027092	-0.025636	0.048213	0.776184	0.057024	0.072113	0.043272	0.110144	0.032864	0.043272
Pf3D7_06_v3	82359	87172	Pf3D7_06_v3	PF3D7_0602000	zinc finger protein, putative	-0.055763	-0.041207	0.022275	-0.069596	-0.07039	0.834997	-0.043978	-0.096221	-0.021504	0.06449	0.009644	-0.021504
Pf3D7_06_v3	92256	96918	Pf3D7_06_v3	PF3D7_0602100	ATP-dependent RNA helicase, putative	-0.080257	-0.082612	-0.047773	-0.027464	-0.078382	0.821231	-0.036224	-0.076	-0.051007	0.087348	-0.010318	-0.051007
Pf3D7_06_v3	97640	99201	Pf3D7_06_v3	PF3D7_0602200	MYND-type zinc finger protein, putative	-0.046146	-0.166478	0.072866	-0.094348	-0.062484	0.821484	-0.055896	-0.176779	0.012803	-0.16796	-0.029027	0.012803
Pf3D7_06_v3	99531	100975	Pf3D7_06_v3	PF3D7_0602300	liver merozoite formation protein, putative	-0.050328	-0.034741	-0.012724	-0.030867	-0.009492	0.853768	-0.036238	-0.037897	0.041355	0.149091	0.047343	0.041355
Pf3D7_06_v3	101135	104811	Pf3D7_06_v3	PF3D7_0602400	elongation factor G	0.052056	0.036838	0.107666	0.00146	0.041619	0.958453	0.053332	0.065619	0.116686	0.239931	0.115687	0.116686
Pf3D7_06_v3	105253	106839	Pf3D7_06_v3	PF3D7_0602500	geranylgeranyl transferase type-2 subunit beta, putative	0.041862	0.008025	0.047839	0.023875	0.01476	0.894101	0.031467	0.000425	0.017594	0.058507	0.07455	0.017594
Pf3D7_06_v3	106840	111914	Pf3D7_06_v3	PF3D7_0602600	SAC3 domain-containing protein, putative	0.050005	-0.070508	-0.049254	-0.065722	-0.065883	0.834156	0.020239	-0.063795	-0.086827	0.067109	-0.03326	-0.086827
Pf3D7_06_v3	113574	115474	Pf3D7_06_v3	PF3D7_0602700	conserved Plasmodium protein, unknown function	-0.026435	0.034376	-0.019926	-0.075845	0.017869	0.910688	-0.005532	-0.002993	0.033503	-0.004816	0.061076	0.033503
Pf3D7_06_v3	115834	118274	Pf3D7_06_v3	PF3D7_0602800	JmjC domain-containing protein, putative	-0.012813	-0.000523	-0.015635	0.022933	-0.019786	0.863418	0.076448	0.005675	-0.018433	-0.001485	0.039484	-0.018433
Pf3D7_06_v3	118388	120453	Pf3D7_06_v3	PF3D7_0602900	conserved Plasmodium protein, unknown function	0.048975	-0.133064	-0.006121	-0.025918	0.023892	0.891715	-0.049538	-0.041669	-0.077719	-0.251192	-0.058074	-0.077719
Pf3D7_06_v3	122384	124662	Pf3D7_06_v3	PF3D7_0603000	conserved Plasmodium protein, unknown function	-0.034065	-0.047526	-0.061108	-0.107417	0.045321	0.848995	0.11527	-0.008268	-0.030722	-0.088875	-0.039666	-0.030722
Pf3D7_06_v3	125208	127066	Pf3D7_06_v3	PF3D7_0603100	RNA-binding protein, putative	-0.025951	1.67317	1.75351	1.93049	1.358	0.863308	1.35679	1.89695	0.003196	0.052489	0.040025	0.003196
Pf3D7_06_v3	128371	130182	Pf3D7_06_v3	PF3D7_0603200	mitochondrial chaperone BCS1, putative	-0.074936	1.66491	1.758	1.93229	1.32523	0.836162	1.35612	1.90624	0.011907	0.064545	0.04988	0.011907
Pf3D7_06_v3	130183	132288	Pf3D7_06_v3	PF3D7_0603300	dihydroorotate dehydrogenase	-0.032068	1.70182	1.77541	2.00852	1.39393	0.855883	1.43528	1.97685	-0.056868	0.00633	-0.001967	-0.056868
Pf3D7_06_v3	132900	136711	Pf3D7_06_v3	PF3D7_0603400	trophozoite exported protein 1	-0.058416	1.65083	1.73326	1.9085	1.35347	0.854299	1.40604	1.91237	-0.004198	0.075819	-0.003529	-0.004198
Pf3D7_06_v3	138943	140768	Pf3D7_06_v3	PF3D7_0603500	cation/H+ antiporter	0.046314	1.7686	1.7834	2.02621	1.40363	0.899541	1.43443	2.01449	0.045883	0.081306	0.050467	0.045883
Pf3D7_06_v3	141168	149193	Pf3D7_06_v3	PF3D7_0603600	conserved Plasmodium protein, unknown function	0.044401	1.71956	1.80729	2.02249	1.39846	0.871964	1.40783	1.99415	0.056458	0.019482	0.052204	0.056458
Pf3D7_06_v3	150805	152463	Pf3D7_06_v3	PF3D7_0603700	phenylalanine--tRNA ligase	0.064253	0.03823	0.027554	0.047386	0.021876	0.895996	0.011609	-0.006576	0.079388	0.173823	0.051092	0.079388
Pf3D7_06_v3	152464	160705	Pf3D7_06_v3	PF3D7_0603800	centrosomal protein CEP76, putative	0.082119	-0.057	-0.051125	0.0869	-0.030194	0.785932	0.06909	0.054433	0.024946	-0.05514	0.010893	0.024946
Pf3D7_06_v3	161004	162631	Pf3D7_06_v3	PF3D7_0603900	conserved Plasmodium protein, unknown function	0.028606	0.006335	0.022183	0.010656	-0.011144	0.594629	0.034884	0.016436	0.000594	0.018489	-0.021573	0.000594
Pf3D7_06_v3	163578	170110	Pf3D7_06_v3	PF3D7_0604000	conserved Plasmodium protein, unknown function	0.028291	0.029928	0.009949	-0.007926	0.009452	0.006782	0.037677	-0.000988	0.011106	0.01151	0.009137	0.011106
Pf3D7_06_v3	171051	177490	Pf3D7_06_v3	PF3D7_0604100	AP2 domain transcription factor	-0.008071	0.031419	0.057254	-0.026889	0.013358	0.012	-0.024277	0.01416	0.044106	0.029161	0.027394	0.044106
Pf3D7_06_v3	180686	181731	Pf3D7_06_v3	PF3D7_0604200	mitochondrial ribosomal protein L41, putative	-0.066111	-0.024258	0.027826	-0.100634	-0.00289	-0.022692	0.011673	-0.002991	0.002723	0.036856	-0.007216	0.002723
Pf3D7_06_v3	181966	184714	Pf3D7_06_v3	PF3D7_0604300	conserved Plasmodium protein, unknown function	-0.014759	0.018041	-0.012593	-0.018669	0.013476	-0.001092	0.034431	0.00863	0.021347	0.008943	0.02701	0.021347
Pf3D7_06_v3	184715	186093	Pf3D7_06_v3	PF3D7_0604400	conserved protein, unknown function	-0.010883	0.052134	0.029503	-0.00961	-0.016276	0.062794	0.078583	0.038559	0.016843	0.058873	-0.008507	0.016843
Pf3D7_06_v3	188762	198328	Pf3D7_06_v3	PF3D7_0604500	conserved Plasmodium protein, unknown function	0.015226	0.086108	0.04687	0.02696	-0.029931	0.023441	-0.047225	0.020743	0.091642	0.066359	0.038521	0.091642
Pf3D7_06_v3	198612	204497	Pf3D7_06_v3	PF3D7_0604600	DNA helicase, putative	0.046216	-0.030019	-0.057055	0.008083	-0.008122	-0.006485	-0.050733	-0.005057	0.002738	-0.192149	0.049643	0.002738
Pf3D7_06_v3	204498	206457	Pf3D7_06_v3	PF3D7_0604700	glyoxalase I-like protein GILP	0.03364	-0.081947	0.071918	0.129617	0.109848	0.028725	0.04721	0.029761	0.076472	0.068236	0.067727	0.076472
Pf3D7_06_v3	206605	211409	Pf3D7_06_v3	PF3D7_0604800	RAP protein, putative	0.001735	0.051792	0.042083	0.060474	0.006188	0.026308	0.072518	0.024847	-0.000859	0.054113	0.020032	-0.000859
Pf3D7_06_v3	212165	213282	Pf3D7_06_v3	PF3D7_0604900	conserved Plasmodium protein, unknown function	-0.110578	-0.018548	-0.007372	-0.068043	-0.042918	-0.034932	-0.011397	-0.080907	-0.019337	0.08883	-0.014774	-0.019337
Pf3D7_06_v3	213308	214392	Pf3D7_06_v3	PF3D7_0605000	50S ribosomal protein L24, putative	0.055454	-0.018794	0.113655	0.082	0.071343	0.045609	-0.051975	-0.061417	0.104536	0.117284	0.070415	0.104536
Pf3D7_06_v3	216990	219757	Pf3D7_06_v3	PF3D7_0605100	RNA-binding protein, putative	0.021301	0.070308	0.120217	0.048944	0.06372	0.128927	0.116164	0.079264	0.160183	0.218539	0.183037	0.160183
Pf3D7_06_v3	220157	222063	Pf3D7_06_v3	PF3D7_0605200	conserved protein, unknown function	0.043066	0.00442	0.0148	0.03433	0.04531	0.036583	0.098983	0.028002	0.060983	0.100054	0.050049	0.060983
Pf3D7_06_v3	222489	224450	Pf3D7_06_v3	PF3D7_0605300	serine/threonine protein kinase	0.011778	0.017193	-0.000715	-0.000462	-0.017623	-0.020935	0.001458	0.045838	0.015777	0.059334	-0.017529	0.015777
Pf3D7_06_v3	225221	227696	Pf3D7_06_v3	PF3D7_0605500	cyclin dependent kinase binding protein, putative	-0.025873	-0.073285	-0.053215	-0.090249	-0.084905	-0.080263	-0.051756	-0.060333	-0.017294	0.011596	-0.077117	-0.017294
Pf3D7_06_v3	227882	235085	Pf3D7_06_v3	PF3D7_0605600	nucleoside diphosphate kinase, putative	0.052534	0.014193	-0.00882	-0.022443	-0.038437	-0.029175	0.015908	0.031869	0.01039	0.050858	0.009134	0.01039
Pf3D7_06_v3	236147	237501	Pf3D7_06_v3	PF3D7_0605700	conserved Plasmodium protein, unknown function	0.058272	0.001168	0.035406	0.070063	-0.028338	-0.032207	-0.059569	-0.024317	-0.053746	0.082937	-0.047701	-0.053746
Pf3D7_06_v3	237561	244771	Pf3D7_06_v3	PF3D7_0605800	DNA repair protein RAD50, putative	0.014379	0.018305	-4.4e-05	0.009711	0.01829	-0.007803	0.072737	0.035463	0.039571	0.090233	0.050355	0.039571
Pf3D7_06_v3	247390	249416	Pf3D7_06_v3	PF3D7_0605900	long chain polyunsaturated fatty acid elongation enzyme, putative	0.07453	0.078485	0.038455	0.071989	0.016761	-0.008741	0.05068	0.058145	0.081877	0.151336	0.079788	0.081877
Pf3D7_06_v3	250362	254053	Pf3D7_06_v3	PF3D7_0606000	conserved Plasmodium protein, unknown function	-0.039408	-0.036726	-0.010761	-0.056691	0.010087	-0.055724	-0.07789	-0.046651	-0.031687	0.096487	-0.013751	-0.031687
Pf3D7_06_v3	257354	260224	Pf3D7_06_v3	PF3D7_0606100	RNA-binding protein, putative	-0.026098	0.033994	0.049701	-0.001394	0.004057	0.043795	0.047259	0.043918	0.053316	0.028371	0.002377	0.053316
Pf3D7_06_v3	260781	262195	Pf3D7_06_v3	PF3D7_0606200	ubiquitin-conjugating enzyme E2 PEX4, putative	0.022595	0.014296	-0.012306	0.011648	0.041332	0.020279	0.013856	0.015024	-0.002057	-0.011569	-0.002468	-0.002057
Pf3D7_06_v3	265589	268649	Pf3D7_06_v3	PF3D7_0606500	polypyrimidine tract-binding protein, putative	0.001347	0.008887	0.011454	0.02163	0.014639	-0.001933	0.02931	-0.007823	0.049649	0.016472	-0.036463	0.049649
Pf3D7_06_v3	270082	278012	Pf3D7_06_v3	PF3D7_0606600	conserved Plasmodium protein, unknown function	0.005357	-0.030112	-0.034633	0.031058	0.073062	0.041068	0.011397	0.001304	0.055867	0.105043	0.030624	0.055867
Pf3D7_06_v3	281799	287267	Pf3D7_06_v3	PF3D7_0606700	coatomer alpha subunit, putative	-0.008289	-0.05618	-0.116662	-0.091916	0.049266	-0.055075	0.070298	-0.028489	0.011899	-0.204383	-0.04078	0.011899
Pf3D7_06_v3	288127	289526	Pf3D7_06_v3	PF3D7_0606800	VFT protein	0.030533	0.009538	0.022769	0.001796	-0.006479	-0.005982	0.008827	-0.019601	0.066828	0.101788	0.003229	0.066828
Pf3D7_06_v3	290176	291335	Pf3D7_06_v3	PF3D7_0606900	glutaredoxin-like protein	0.055259	0.033467	0.035458	-0.002707	0.054301	0.03745	0.031904	0.003469	-0.033365	-0.007518	-0.083004	-0.033365
Pf3D7_06_v3	293614	297047	Pf3D7_06_v3	PF3D7_0607000	translation initiation factor IF-2, putative	-0.020909	-0.110009	-0.083406	-0.053984	-0.036092	-0.070946	0.048415	-0.042129	-0.046111	0.006071	-0.049913	-0.046111
Pf3D7_06_v3	297691	301447	Pf3D7_06_v3	PF3D7_0607100	MYND-type zinc finger protein, putative	0.095266	-0.030751	-0.065483	-0.044254	-0.022493	-0.027814	-0.000563	0.032702	-0.082564	-0.007316	-0.08697	-0.082564
Pf3D7_06_v3	301624	303540	Pf3D7_06_v3	PF3D7_0607200	RING zinc finger protein, putative	0.030609	0.004174	-0.031488	-0.021053	-0.051761	-0.028821	-0.000488	-0.043999	-0.08451	-0.047789	-0.045239	-0.08451
Pf3D7_06_v3	304388	306213	Pf3D7_06_v3	PF3D7_0607300	uroporphyrinogen III decarboxylase	-0.052493	-0.056459	-0.072526	-0.016277	-0.034798	0.007546	0.021143	0.020039	-0.01062	-0.047638	-0.021382	-0.01062
Pf3D7_06_v3	306214	310211	Pf3D7_06_v3	PF3D7_0607400	G-protein associated signal transduction protein, putative	-0.003855	0.024644	0.019879	0.025945	0.00571	0.033318	0.02698	0.005302	0.003922	0.1395	0.04107	0.003922
Pf3D7_06_v3	311300	313365	Pf3D7_06_v3	PF3D7_0607500	4-hydroxybenzoate polyprenyltransferase, putative	0.008459	0.001547	0.04141	0.018328	0.045243	0.015716	0.035483	0.002528	0.01242	-0.013543	0.030084	0.01242
Pf3D7_06_v3	313606	317132	Pf3D7_06_v3	PF3D7_0607600	spindle assembly abnormal protein 6, putative	0.030916	-0.01768	-0.004819	0.028743	-0.001864	-0.005598	-0.003527	0.00047	0.026986	0.037091	-0.011664	0.026986
Pf3D7_06_v3	320490	329248	Pf3D7_06_v3	PF3D7_0607700	conserved Plasmodium protein, unknown function	0.032541	-0.01311	-0.009725	0.011206	-0.050565	-0.019093	0.034069	-0.048592	-0.022715	-0.076068	-0.024373	-0.022715
Pf3D7_06_v3	329287	331975	Pf3D7_06_v3	PF3D7_0607800	GTP-binding protein, putative	-0.004459	0.149117	0.082672	0.096236	0.070949	0.071001	0.023022	0.060476	0.117473	0.25382	0.086878	0.117473
Pf3D7_06_v3	332093	335020	Pf3D7_06_v3	PF3D7_0607900	conserved Plasmodium protein, unknown function	0.047231	0.001613	0.022923	0.046463	0.010263	0.006932	0.005518	0.035472	0.110551	0.012451	0.090325	0.110551
Pf3D7_06_v3	335021	337580	Pf3D7_06_v3	PF3D7_0608000	diphthine methyltransferase, putative	-0.003952	0.012318	0.06759	0.107146	-0.047255	-0.043504	0.047583	0.043963	-0.004467	0.171712	-0.011583	-0.004467
Pf3D7_06_v3	337581	341817	Pf3D7_06_v3	PF3D7_0608100	conserved Plasmodium protein, unknown function	0.070793	0.016481	0.058193	0.024094	0.022189	0.061432	0.028914	-0.029338	0.04387	-0.213208	0.051503	0.04387
Pf3D7_06_v3	341818	343016	Pf3D7_06_v3	PF3D7_0608200	conserved Plasmodium protein, unknown function	-0.058912	-0.039168	-0.079596	0.027504	-0.077989	0.027087	0.042197	-0.014299	-0.010966	-0.004335	-0.072301	-0.010966
Pf3D7_06_v3	343017	347757	Pf3D7_06_v3	PF3D7_0608300	heptatricopeptide repeat-containing protein, putative	-0.014408	-0.003979	-0.043514	-0.02986	-0.045603	0.002759	0.021983	-0.083872	-0.085187	0.038154	-0.055201	-0.085187
Pf3D7_06_v3	347760	349621	Pf3D7_06_v3	PF3D7_0608310	sorting assembly machinery 50 kDa subunit, putative	-0.028081	-0.001278	0.038997	0.087545	-0.004121	0.007932	0.088829	0.057247	-0.003633	0.072057	-0.037183	-0.003633
Pf3D7_06_v3	349696	350765	Pf3D7_06_v3	PF3D7_0608400	conserved Plasmodium protein, unknown function	0.070517	0.007888	-0.047239	0.064281	-0.067012	0.097402	0.087231	0.053043	-0.010248	0.083255	0.037152	-0.010248
Pf3D7_06_v3	351530	353025	Pf3D7_06_v3	PF3D7_0608500	proteasome subunit alpha type-2, putative	-0.022374	-0.014151	0.044183	-0.009263	-0.014523	-0.043828	0.059071	0.004747	0.025962	0.127389	-0.023434	0.025962
Pf3D7_06_v3	354979	356526	Pf3D7_06_v3	PF3D7_0608600	conserved Plasmodium protein, unknown function	0.016135	0.024628	0.106638	0.084687	0.020301	0.0318	0.092466	0.044066	0.093886	-0.06144	0.097653	0.093886
Pf3D7_06_v3	358141	360453	Pf3D7_06_v3	PF3D7_0608700	T-complex protein 1 subunit zeta	0.032566	-0.035743	0.045755	0.05327	-0.021956	0.018668	0.052474	0.041937	0.045042	-0.034611	0.01762	0.045042
Pf3D7_06_v3	362385	364129	Pf3D7_06_v3	PF3D7_0608800	ornithine aminotransferase	-0.020578	-0.013453	0.019879	0.029803	-0.010764	0.051009	0.03878	0.012448	0.025328	0.045074	0.015592	0.025328
Pf3D7_06_v3	365037	368709	Pf3D7_06_v3	PF3D7_0608900	conserved Plasmodium protein, unknown function	-0.021184	-0.02384	0.0425	-0.038097	-0.052296	-0.060145	-0.031855	-0.045466	-0.052924	0.099558	-0.073879	-0.052924
Pf3D7_06_v3	370011	388704	Pf3D7_06_v3	PF3D7_0609000	nucleoporin NUP637, putative	-0.027369	0.081742	0.046396	-0.000487	-0.021537	-0.026647	-0.02138	-0.009317	-0.015767	0.163105	0.012915	-0.015767
Pf3D7_06_v3	388705	390998	Pf3D7_06_v3	PF3D7_0609100	zinc transporter ZIP1, putative	-0.067629	-0.053678	-0.047702	-0.008198	-0.029523	-0.029919	0.011191	-0.031702	-0.023199	0.058118	-0.105773	-0.023199
Pf3D7_06_v3	392741	394861	Pf3D7_06_v3	PF3D7_0609200	citrate synthase-like protein, putative	-0.00115	0.012823	-0.105341	0.01183	-0.080234	-0.028149	-0.030502	0.062619	-0.03623	-0.030675	-0.023436	-0.03623
Pf3D7_06_v3	395992	399539	Pf3D7_06_v3	PF3D7_0609300	conserved Plasmodium protein, unknown function	-0.03413	-0.016604	-0.022888	-0.009475	-0.007277	0.007441	0.043076	0.007094	-0.024807	0.079254	-0.006363	-0.024807
Pf3D7_06_v3	399563	401874	Pf3D7_06_v3	PF3D7_0609400	mitochondrial cardiolipin synthase, putative	-0.025755	-0.063138	-0.030042	-0.038217	-0.042771	0.011706	0.068048	0.013608	-0.003555	0.020771	-0.02407	-0.003555
Pf3D7_06_v3	402472	407492	Pf3D7_06_v3	PF3D7_0609500	conserved Plasmodium protein, unknown function	-0.063204	-0.038892	-0.049089	-0.055995	-0.055855	-0.006808	-0.032804	-0.015444	-0.010456	0.096633	-0.04063	-0.010456
Pf3D7_06_v3	407791	412252	Pf3D7_06_v3	PF3D7_0609600	conserved Plasmodium protein, unknown function	0.036552	-0.019159	-0.017423	-0.028838	-0.023081	-0.040179	-0.030124	-0.017524	0.062325	0.135255	0.043742	0.062325
Pf3D7_06_v3	413402	420031	Pf3D7_06_v3	PF3D7_0609700	conserved Plasmodium protein, unknown function	-0.036208	0.00571	-0.008589	0.020829	-0.022566	0.028129	0.019125	0.018653	0.048636	0.042171	0.003909	0.048636
Pf3D7_06_v3	420907	422872	Pf3D7_06_v3	PF3D7_0609800	palmitoyltransferase DHHC2, putative	-0.027907	-0.053527	0.003424	0.042163	0.030328	0.029709	-0.042803	-0.075918	0.057845	0.006299	0.036785	0.057845
Pf3D7_06_v3	425555	432108	Pf3D7_06_v3	PF3D7_0609900	conserved Plasmodium protein, unknown function	-0.077944	-0.018438	0.001188	-0.015461	-0.036922	-0.027108	0.044162	-0.044187	0.083398	0.131107	0.016428	0.083398
Pf3D7_06_v3	432758	434428	Pf3D7_06_v3	PF3D7_0610000	mitochondrial ribosomal protein L19 precursor, putative	0.011638	0.049891	-0.047447	-0.066912	0.007029	0.03164	-0.015039	0.050025	-0.00263	0.027338	-0.041285	-0.00263
Pf3D7_06_v3	434557	436715	Pf3D7_06_v3	PF3D7_0610100	pre-mRNA-splicing factor SLU7, putative	-0.126973	0.076518	0.062041	0.044888	-0.015282	-0.000149	0.034226	0.020769	-0.057479	-0.097162	-0.014192	-0.057479
Pf3D7_06_v3	437413	440795	Pf3D7_06_v3	PF3D7_0610200	RNA-binding protein 25, putative	-0.111491	0.0172	-0.058126	-0.030131	0.003067	-0.02241	-0.062776	-0.080387	-0.061184	0.063503	-0.024464	-0.061184
Pf3D7_06_v3	444497	445407	Pf3D7_06_v3	PF3D7_0610400	histone H3	-0.108407	-0.006575	0.014211	-0.012579	-0.068936	-0.0135	-0.021619	-0.034823	-0.024515	0.055877	-0.074171	-0.024515
Pf3D7_06_v3	445511	446613	Pf3D7_06_v3	PF3D7_0610500	peptidyl-tRNA hydrolase PTRHD1, putative	-0.028998	-0.062497	-0.00278	-0.033896	-0.043113	0.004928	-0.011013	-0.025093	0.003681	0.068806	-0.015919	0.003681
Pf3D7_06_v3	449041	451711	Pf3D7_06_v3	PF3D7_0610600	calcium-dependent protein kinase 2	-0.057348	-3.6e-05	-0.069398	-0.066289	-0.046297	0.004093	-0.052505	-0.000883	-0.027317	0.048633	-0.043006	-0.027317
Pf3D7_06_v3	453559	455939	Pf3D7_06_v3	PF3D7_0610800	transketolase	-0.06526	-0.019489	-0.077725	-0.072704	-0.020531	-0.064523	-0.069554	-0.060865	-0.151041	-0.078853	-0.135929	-0.151041
Pf3D7_06_v3	456497	460839	Pf3D7_06_v3	PF3D7_0610900	transcription elongation factor SPT5, putative	-0.047339	-0.002043	-0.010101	0.084089	0.03957	0.032455	0.022911	-0.067967	0.031792	0.108991	-0.087076	0.031792
Pf3D7_06_v3	463314	464926	Pf3D7_06_v3	PF3D7_0611000	SNARE associated Golgi protein, putative	0.019507	0.062312	0.102185	0.039133	0.027724	0.072791	0.029816	-0.011802	-0.027422	-0.029937	-0.06333	-0.027422
Pf3D7_06_v3	465948	466699	Pf3D7_06_v3	PF3D7_0611100	succinate dehydrogenase subunit 3, putative	-0.099435	-0.025474	-0.062366	-0.022424	-0.09764	0.002174	-0.003787	-0.021071	-0.04797	-0.136248	-0.062627	-0.04797
Pf3D7_06_v3	467231	468892	Pf3D7_06_v3	PF3D7_0611200	AP2 domain transcription factor, putative	-0.148846	0.020916	-0.108323	-0.04355	-0.068258	0.076778	0.021209	-0.100172	-0.082989	-0.061522	-0.020939	-0.082989
Pf3D7_06_v3	469799	471441	Pf3D7_06_v3	PF3D7_0611300	ATP synthase-associated protein, putative	-0.050951	0.019678	-0.085183	-0.052626	-0.054155	-0.002379	-0.083634	-0.027477	-0.060935	-0.146212	-0.059998	-0.060935
Pf3D7_06_v3	471442	474400	Pf3D7_06_v3	PF3D7_0611400	SWIB/MDM2 domain-containing protein	-0.031016	0.006176	-0.047126	0.005977	0.025628	-0.023471	0.024013	0.02055	-0.055227	-0.055708	-0.076742	-0.055227
Pf3D7_06_v3	482575	484157	Pf3D7_06_v3	PF3D7_0611500	conserved protein, unknown function	0.016376	-0.006017	-0.05768	0.019951	0.006475	-0.035316	0.005741	-0.026276	0.046746	0.065241	0.114956	0.046746
Pf3D7_06_v3	484864	487316	Pf3D7_06_v3	PF3D7_0611600	basal complex transmembrane protein 1	0.016839	0.1192	0.041452	0.146946	0.11967	0.074912	0.03668	0.080314	0.095507	0.242435	0.134249	0.095507
Pf3D7_06_v3	490608	501390	Pf3D7_06_v3	PF3D7_0611800	conserved Plasmodium protein, unknown function	0.006245	0.046477	-0.051908	0.079699	0.04188	0.057134	0.042723	0.046514	0.002026	0.050859	-0.002922	0.002026
Pf3D7_06_v3	506130	507438	Pf3D7_06_v3	PF3D7_0611900	lsm12, putative	0.010202	0.041334	-0.035364	-0.028796	0.01109	0.030419	0.031552	0.025853	-0.02319	0.007265	-0.011725	-0.02319
Pf3D7_06_v3	507439	508536	Pf3D7_06_v3	PF3D7_0612000	conserved Plasmodium protein, unknown function	-0.119901	-0.037822	-0.080153	-0.146004	-0.032784	0.003605	0.10878	-0.07697	-0.026326	-0.022084	0.002547	-0.026326
Pf3D7_06_v3	508910	511380	Pf3D7_06_v3	PF3D7_0612100	eukaryotic translation initiation factor 3 subunit L, putative	-0.065248	-0.004618	-0.060517	0.014428	0.049732	0.045381	-0.004118	-0.00482	-0.024824	-0.066052	-0.100017	-0.024824
Pf3D7_06_v3	512722	519798	Pf3D7_06_v3	PF3D7_0612200	leucine-rich repeat protein	0.048962	-0.030242	0.031732	0.037867	0.05074	0.007452	0.016309	-0.012291	-0.002793	-0.132841	-0.076119	-0.002793
Pf3D7_06_v3	521168	522119	Pf3D7_06_v3	PF3D7_0612400	conserved Plasmodium protein, unknown function	-0.029138	0.105493	0.032977	0.02399	0.082421	0.127447	0.142248	0.121079	0.003487	0.09852	0.033807	0.003487
Pf3D7_06_v3	523407	525355	Pf3D7_06_v3	PF3D7_0612600	cytoplasmic tRNA 2-thiolation protein 1, putative	-0.092362	-0.045607	0.005223	-0.011444	-0.082975	0.002053	0.024202	-0.02287	-0.003079	-0.013639	0.000799	-0.003079
Pf3D7_06_v3	525737	527280	Pf3D7_06_v3	PF3D7_0612700	6-cysteine protein P12	0.001644	0.050878	0.029341	0.064521	0.019905	0.039425	0.086004	-0.003152	-0.000441	-0.160076	-0.025029	-0.000441
Pf3D7_06_v3	527810	529425	Pf3D7_06_v3	PF3D7_0612800	6-cysteine protein	-0.12328	-0.022587	-0.008849	-0.047046	-0.040132	-0.041458	-0.039267	-0.121147	-0.113175	-0.131664	-0.137058	-0.113175
Pf3D7_06_v3	530876	533436	Pf3D7_06_v3	PF3D7_0612900	nucleolar GTP-binding protein 1, putative	-0.025286	-0.006555	0.019207	0.007253	-0.008601	0.073055	-0.024651	0.031426	-0.058584	-0.053819	0.003949	-0.058584
Pf3D7_06_v3	533657	535614	Pf3D7_06_v3	PF3D7_0613000	conserved Plasmodium protein, unknown function	-0.024031	-0.024828	-0.026899	-0.014188	-0.03674	-0.051276	-0.036488	-0.012935	0.001292	-0.010161	-0.008362	0.001292
Pf3D7_06_v3	537528	538835	Pf3D7_06_v3	PF3D7_0613100	conserved Plasmodium protein, unknown function	0.046419	0.027141	0.188565	0.097553	0.055884	0.110759	0.141803	0.073422	0.181927	0.120032	0.107915	0.181927
Pf3D7_06_v3	539054	539875	Pf3D7_06_v3	PF3D7_0613200	conserved Plasmodium protein, unknown function	0.017343	0.054815	0.079514	0.023846	0.04652	0.019527	0.05903	0.05208	0.090316	0.144735	0.0614	0.090316
Pf3D7_06_v3	539876	545048	Pf3D7_06_v3	PF3D7_0613300	rhoptry protein ROP14	-0.032587	0.031743	0.021447	0.033658	0.029126	-0.060656	0.007345	0.027455	0.023328	0.0243	0.002744	0.023328
Pf3D7_06_v3	546714	547991	Pf3D7_06_v3	PF3D7_0613400	50S ribosomal protein L18, apicoplast, putative	-0.000225	0.059753	0.031174	-0.004334	0.016437	0.010435	0.061012	0.011204	0.102657	0.167297	0.06383	0.102657
Pf3D7_06_v3	548030	552621	Pf3D7_06_v3	PF3D7_0613500	AP-3 complex subunit beta, putative	-0.022181	-0.008371	0.012137	0.021246	-0.023534	0.005837	-0.011566	0.051419	0.028887	0.031057	0.01271	0.028887
Pf3D7_06_v3	554207	558478	Pf3D7_06_v3	PF3D7_0613600	conserved Plasmodium protein, unknown function	-0.019355	0.029931	-0.004568	0.032293	-0.017768	0.023616	0.018392	0.034114	0.030571	0.089174	-0.003677	0.030571
Pf3D7_06_v3	559099	561710	Pf3D7_06_v3	PF3D7_0613700	syntaxin-binding protein, putative	-0.087081	-0.038602	-0.044501	-0.020724	-0.033245	0.013968	-0.046157	-0.042227	-0.035921	-0.001469	-0.028151	-0.035921
Pf3D7_06_v3	565889	579214	Pf3D7_06_v3	PF3D7_0613800	AP2 domain transcription factor, putative	-0.077132	-0.028282	-0.055846	-0.024661	-0.009507	-0.03417	-0.015051	-0.003935	-0.080943	-0.122762	-0.108953	-0.080943
Pf3D7_06_v3	579215	586146	Pf3D7_06_v3	PF3D7_0613900	myosin E, putative	0.000532	-0.001244	0.005068	0.013604	0.030229	-0.004312	0.032377	0.010087	-0.037767	-0.030092	-0.04118	-0.037767
Pf3D7_06_v3	586769	588885	Pf3D7_06_v3	PF3D7_0614000	thiamine-phosphate synthase, putative	-0.017886	0.020974	0.077414	0.057279	0.055428	0.088959	0.096147	0.031621	0.038229	0.073745	0.038462	0.038229
Pf3D7_06_v3	589207	592514	Pf3D7_06_v3	PF3D7_0614100	conserved Plasmodium protein, unknown function	-0.022749	0.014776	-0.060056	-0.142107	-0.028511	0.010058	0.005149	0.044302	-0.008803	0.049521	0.016217	-0.008803
Pf3D7_06_v3	592922	596154	Pf3D7_06_v3	PF3D7_0614200	cytosolic Fe-S cluster assembly factor NAR1, putative	-0.031334	-0.005012	0.009081	-0.079262	0.014446	-0.021582	0.035673	0.034084	-0.031163	0.048237	-0.049987	-0.031163
Pf3D7_06_v3	597234	600767	Pf3D7_06_v3	PF3D7_0614300	major facilitator superfamily-related transporter, putative	-0.021445	0.014479	-0.046341	0.040623	0.036853	0.051068	-0.0064	0.118334	0.03595	-0.062951	0.054724	0.03595
Pf3D7_06_v3	604323	605590	Pf3D7_06_v3	PF3D7_0614400	pre-mRNA-splicing factor CWF7, putative	-0.096732	-0.061817	-0.084292	-0.043779	-0.022954	-0.049267	0.024479	-0.048427	-0.073325	0.02165	-0.025428	-0.073325
Pf3D7_06_v3	605892	607509	Pf3D7_06_v3	PF3D7_0614500	60S ribosomal protein L19	-0.069469	-0.028844	-0.088786	-0.071984	-0.07499	-0.072036	-0.081832	-0.05706	-0.050958	-0.015464	-0.039747	-0.050958
Pf3D7_06_v3	609008	611352	Pf3D7_06_v3	PF3D7_0614600	conserved Plasmodium protein, unknown function	-0.012993	0.014348	0.024584	0.013567	-0.023785	-0.017655	-0.029166	0.047536	-0.004726	0.009667	-0.006922	-0.004726
Pf3D7_06_v3	612221	614648	Pf3D7_06_v3	PF3D7_0614700	conserved Plasmodium protein, unknown function	-0.022669	0.010544	0.028467	0.007705	0.037293	-0.023349	0.068254	0.001458	-0.000431	0.111285	0.024452	-0.000431
Pf3D7_06_v3	615047	616860	Pf3D7_06_v3	PF3D7_0614800	endonuclease III-like protein 1, putative	-0.022721	0.000217	0.001461	0.040294	-0.019428	0.013229	0.040728	0.063201	0.066032	-0.055598	-0.010558	0.066032
Pf3D7_06_v3	617512	621786	Pf3D7_06_v3	PF3D7_0614900	conserved Plasmodium membrane protein, unknown function	-0.076201	-0.138129	-0.103727	-0.032227	-0.113022	-0.08985	-0.01194	-0.019766	-0.073413	-0.148931	-0.072223	-0.073413
Pf3D7_06_v3	622868	624571	Pf3D7_06_v3	PF3D7_0615100	enoyl-acyl carrier reductase	-0.041521	-0.019379	-0.052644	-0.008188	-0.033222	0.006093	0.009293	-0.016889	-0.032887	0.047317	0.002548	-0.032887
Pf3D7_06_v3	625115	627652	Pf3D7_06_v3	PF3D7_0615200	conserved protein, unknown function	-0.090885	-0.022102	-0.016427	-0.030166	-0.036425	0.027779	0.022488	-0.017906	-0.01219	0.085687	-0.0329	-0.01219
Pf3D7_06_v3	627653	630567	Pf3D7_06_v3	PF3D7_0615300	GPI-anchored wall transfer protein 1, putative	-0.013667	0.005505	0.033849	0.004809	0.001966	0.043023	0.01474	0.008742	-0.006928	0.003158	0.025291	-0.006928
Pf3D7_06_v3	630706	640424	Pf3D7_06_v3	PF3D7_0615400	ribonuclease, putative	0.006792	0.049982	0.082769	0.061959	-0.029086	-0.049197	0.039738	0.007391	0.005817	-0.037371	-0.007826	0.005817
Pf3D7_06_v3	643802	646403	Pf3D7_06_v3	PF3D7_0615500	cdc2-related protein kinase 5	0.052095	-0.006731	0.047002	0.011312	-0.030207	-0.020728	-0.028248	0.001194	0.000641	-0.012558	-0.01537	0.000641
Pf3D7_06_v3	646404	655846	Pf3D7_06_v3	PF3D7_0615600	zinc finger protein, putative	0.005367	-0.004143	0.07575	0.0318	-0.012597	0.068566	0.05284	0.014874	0.090542	0.128465	0.1048	0.090542
Pf3D7_06_v3	656126	657787	Pf3D7_06_v3	PF3D7_0615700	RNA and export factor binding protein, putative	0.053113	0.097441	0.125211	0.14682	0.090273	0.085609	0.11682	0.133294	0.141321	0.110286	0.181861	0.141321
Pf3D7_06_v3	657788	662039	Pf3D7_06_v3	PF3D7_0615800	conserved oligomeric Golgi complex subunit 4, putative	0.067012	-0.072173	0.036237	0.072775	0.075729	-0.00338	0.003924	0.025707	0.019563	0.00664	-0.028926	0.019563
Pf3D7_06_v3	662185	668105	Pf3D7_06_v3	PF3D7_0615900	protein phosphatase, putative	0.162347	0.066204	0.02245	0.070241	0.046049	0.078417	0.102418	0.105152	0.038972	-0.006219	0.053798	0.038972
Pf3D7_06_v3	669610	671875	Pf3D7_06_v3	PF3D7_0616000	pyridoxal kinase	-0.06363	-0.077843	-0.063134	0.122853	-0.015594	0.041954	-0.05168	-0.037184	0.052292	-0.077136	0.010912	0.052292
Pf3D7_06_v3	671876	673004	Pf3D7_06_v3	PF3D7_0616100	conserved Plasmodium protein, unknown function	-0.057783	-0.057032	-0.019428	-0.034328	-0.05452	-0.014126	-0.036645	-0.059833	-0.068493	-0.150526	-0.028319	-0.068493
Pf3D7_06_v3	673868	676625	Pf3D7_06_v3	PF3D7_0616200	kinetochore protein NDC80, putative	-0.053935	-0.012317	0.010633	-0.009972	0.001914	-0.008351	0.05361	-0.016868	-0.042004	-0.048713	-0.010118	-0.042004
Pf3D7_06_v3	676638	677821	Pf3D7_06_v3	PF3D7_0616300	conserved Plasmodium protein, unknown function	0.067169	0.107423	0.089075	0.032346	0.030765	0.078623	0.142699	0.085907	0.14514	0.041733	0.110902	0.14514
Pf3D7_06_v3	678137	683679	Pf3D7_06_v3	PF3D7_0616400	conserved Plasmodium protein, unknown function	-0.075903	-0.024731	-0.041774	0.016725	-0.002325	-0.006631	-0.037197	0.010599	-0.046267	-0.026923	-0.070446	-0.046267
Pf3D7_06_v3	684492	689055	Pf3D7_06_v3	PF3D7_0616500	TRAP-like protein	0.009796	-0.010599	0.021701	0.021238	-0.074084	-0.009617	-0.055146	-0.033829	0.036562	0.090451	0.034315	0.036562
Pf3D7_06_v3	689056	691381	Pf3D7_06_v3	PF3D7_0616600	conserved protein, unknown function	0.002238	-0.031821	-0.028367	-0.002838	0.01258	0.042807	0.043286	0.046669	-0.015676	-0.093898	0.007007	-0.015676
Pf3D7_06_v3	691519	693569	Pf3D7_06_v3	PF3D7_0616700	ras GTPAse, putative	0.004957	-0.020059	-0.048942	0.014461	-0.033641	-0.036652	-0.056649	-0.032107	-0.027986	-0.124865	-0.000638	-0.027986
Pf3D7_06_v3	695679	697744	Pf3D7_06_v3	PF3D7_0616800	malate:quinone oxidoreductase	-0.033339	0.026692	0.016511	0.047967	0.030506	-0.001039	0.031164	0.01615	0.000806	0.039038	-0.002422	0.000806
Pf3D7_06_v3	699002	703467	Pf3D7_06_v3	PF3D7_0616900	conserved Plasmodium protein, unknown function	0.027827	0.018507	0.000889	0.052247	0.017301	0.037755	0.136948	0.132061	0.054374	0.188035	0.019957	0.054374
Pf3D7_06_v3	703785	705418	Pf3D7_06_v3	PF3D7_0617000	mitochondrial import receptor subunit TOM40, putative	0.001576	0.036622	-0.009031	-0.017381	0.004483	-0.08129	0.009907	0.005121	0.070924	0.061869	0.071274	0.070924
Pf3D7_06_v3	709809	714826	Pf3D7_06_v3	PF3D7_0617100	AP-2 complex subunit alpha, putative	0.041767	0.092936	0.158755	0.049323	0.04359	0.06381	0.010164	0.059724	0.1717	0.137885	0.147043	0.1717
Pf3D7_06_v3	716800	719167	Pf3D7_06_v3	PF3D7_0617200	conserved protein, unknown function	-0.094303	-0.046969	-0.111397	-0.141438	-0.115941	-0.109882	-0.047486	-0.141477	-0.135934	0.057197	-0.064978	-0.135934
Pf3D7_06_v3	720285	721562	Pf3D7_06_v3	PF3D7_0617300	conserved Plasmodium protein, unknown function	-0.077638	-0.01937	0.219525	-0.088127	-0.0046	-0.050966	0.040519	-0.072964	0.017113	0.016796	-0.017359	0.017113
Pf3D7_06_v3	722867	731740	Pf3D7_06_v3	PF3D7_0617400	erythrocyte membrane protein 1, PfEMP1	-0.137323	-0.059093	0.190586	-0.063079	-0.004814	0.031035	-0.031537	-0.049234	0.007322	-0.024315	0.015722	0.007322
Pf3D7_06_v3	754145	755055	Pf3D7_06_v3	PF3D7_0617900	histone H3 variant	-0.080096	-0.05757	-0.095458	0.048725	-0.015697	-0.157361	-0.123251	0.025422	0.052557	-0.204421	0.032907	0.052557
Pf3D7_06_v3	758359	761246	Pf3D7_06_v3	PF3D7_0618000	conserved Plasmodium membrane protein, unknown function	-0.080032	-0.063552	-0.101372	-0.053403	-0.079928	-0.119898	-0.077484	-0.078938	-0.093317	-0.132097	-0.107974	-0.093317
Pf3D7_06_v3	761689	764418	Pf3D7_06_v3	PF3D7_0618100	conserved Plasmodium protein, unknown function	-0.089581	-0.018341	-0.023682	-0.009664	-0.092404	-0.060733	0.013048	-0.00113	-0.024654	-0.124149	-0.044855	-0.024654
Pf3D7_06_v3	764419	765742	Pf3D7_06_v3	PF3D7_0618200	conserved protein, unknown function	-0.039878	-0.06831	-0.015276	0.004001	-0.028094	-0.019718	0.056467	-0.01763	0.008836	-0.0768	-0.027047	0.008836
Pf3D7_06_v3	768542	769706	Pf3D7_06_v3	PF3D7_0618300	60S ribosomal protein L27a, putative	0.069542	0.06163	0.118193	0.150338	0.10907	0.072989	0.092493	0.114711	0.128744	0.122637	0.113448	0.128744
Pf3D7_06_v3	769897	772756	Pf3D7_06_v3	PF3D7_0618400	LMBR1 domain-containing protein, putative	-0.081983	-0.063908	-0.117501	-0.057196	-0.076207	-0.061485	-0.043019	-0.069202	-0.129747	-0.165976	-0.092242	-0.129747
Pf3D7_06_v3	774279	775720	Pf3D7_06_v3	PF3D7_0618500	malate dehydrogenase	0.002165	0.003798	0.035867	0.088495	0.018866	0.039028	0.022889	-0.016162	0.035265	-0.033163	0.052965	0.035265
Pf3D7_06_v3	775730	778085	Pf3D7_06_v3	PF3D7_0618600	rhomboid protease ROM10	0.011021	-0.049608	0.037963	0.056738	0.005538	0.018577	-0.016036	-0.007022	-0.064066	-0.028575	-0.070673	-0.064066
Pf3D7_06_v3	778442	779742	Pf3D7_06_v3	PF3D7_0618700	trafficking protein particle complex subunit 6A, putative	-0.095855	-0.026578	-0.061766	-0.060906	-0.074768	-0.047002	-0.030792	-0.042448	-0.084294	-0.221549	0.047538	-0.084294
Pf3D7_06_v3	779743	783546	Pf3D7_06_v3	PF3D7_0618800	heptatricopeptide repeat-containing protein, putative	-0.01783	-0.047726	-0.092538	-0.009947	0.00328	0.002725	-0.073161	0.017739	0.012692	-0.097845	0.025754	0.012692
Pf3D7_06_v3	784104	788277	Pf3D7_06_v3	PF3D7_0618900	phosphatidylinositol N-acetylglucosaminyltransferase subunit GPI1	0.014896	-0.00763	-0.001994	0.049761	-0.056116	-0.021288	0.013886	0.021449	0.040776	0.010732	0.02801	0.040776
Pf3D7_06_v3	788457	796275	Pf3D7_06_v3	PF3D7_0619000	conserved protein, unknown function	0.008336	0.040378	0.023022	0.067434	0.02012	0.033188	0.048558	0.065359	0.030875	0.023527	0.048583	0.030875
Pf3D7_06_v3	796961	798768	Pf3D7_06_v3	PF3D7_0619100	conserved Plasmodium protein, unknown function	-0.06817	-0.034096	-0.082705	-0.040216	-0.046968	0.044138	-0.128205	0.057128	-0.013325	-0.103382	-0.067561	-0.013325
Pf3D7_06_v3	799147	803039	Pf3D7_06_v3	PF3D7_0619200	conserved Plasmodium protein, unknown function	-0.039981	-0.011329	-0.008575	-0.005493	-0.012739	-0.039918	0.006706	0.036965	-0.024673	-0.019822	-0.018407	-0.024673
Pf3D7_06_v3	803124	814802	Pf3D7_06_v3	PF3D7_0619300	conserved Plasmodium protein, unknown function	-0.012187	-0.056079	-0.047024	-0.03097	-0.017987	-0.026427	0.020854	-0.014673	-0.041043	-0.087226	-0.042084	-0.041043
Pf3D7_06_v3	815372	818497	Pf3D7_06_v3	PF3D7_0619400	cell division cycle protein 48 homologue, putative	0.025061	0.061815	0.093959	0.035593	0.036813	0.076166	0.048772	0.053338	0.094044	0.032676	0.068651	0.094044
Pf3D7_06_v3	819819	824497	Pf3D7_06_v3	PF3D7_0619500	acyl-CoA synthetase	-0.057176	-0.044102	-0.004225	-0.019415	-0.022677	-0.038925	-0.009008	-0.037064	-0.032051	-0.032733	-0.005503	-0.032051
Pf3D7_06_v3	824907	827985	Pf3D7_06_v3	PF3D7_0619600	conserved Plasmodium protein, unknown function	0.012005	0.038207	-0.002628	0.043617	-0.02701	-0.00644	0.054617	0.088607	0.00505	-0.039872	-0.009094	0.00505
Pf3D7_06_v3	827986	830639	Pf3D7_06_v3	PF3D7_0619700	conserved protein, unknown function	0.034445	-0.094119	-0.070997	-0.006154	-0.027485	-0.074623	-0.09223	-0.03524	-0.076605	-0.225417	-0.051711	-0.076605
Pf3D7_06_v3	831036	839283	Pf3D7_06_v3	PF3D7_0619800	conserved Plasmodium membrane protein, unknown function	-0.009264	-0.030818	-0.038335	0.035784	-0.00171	0.016119	-0.003017	-0.020088	-0.027796	-0.107966	0.021844	-0.027796
Pf3D7_06_v3	840273	841474	Pf3D7_06_v3	PF3D7_0619900	splicing factor 3A subunit 2, putative	0.006199	-0.033603	0.006989	0.037707	-0.055911	-0.067863	-0.028924	-0.00711	0.032891	0.067903	-0.009098	0.032891
Pf3D7_06_v3	841596	843613	Pf3D7_06_v3	PF3D7_0620000	secreted ookinete protein 25, putative	-0.064157	-0.014212	-0.011221	0.05086	-0.03243	-0.062246	-0.019482	-0.002618	0.048308	0.077716	0.015765	0.048308
Pf3D7_06_v3	845410	846340	Pf3D7_06_v3	PF3D7_0620100	ATP synthase-associated protein, putative	-0.077149	-0.010237	-0.07624	-0.006951	-0.032777	-0.039641	-0.108308	-0.068424	-0.037196	0.010584	-0.098064	-0.037196
Pf3D7_06_v3	846341	847744	Pf3D7_06_v3	PF3D7_0620200	conserved Plasmodium protein, unknown function	-0.082471	-0.058985	-0.01034	-0.054017	-0.122299	-0.071198	0.026632	-0.077581	-0.077753	0.039622	-0.008229	-0.077753
Pf3D7_06_v3	848155	851114	Pf3D7_06_v3	PF3D7_0620300	conserved Plasmodium protein, unknown function	0.00247	0.059984	0.019056	0.073858	0.029563	-0.006745	-0.053232	-0.022749	0.02782	-0.188808	0.02905	0.02782
Pf3D7_06_v3	851128	853205	Pf3D7_06_v3	PF3D7_0620400	merozoite surface protein 10	0.084844	0.039593	0.024463	0.067702	0.037419	-0.009518	-0.068144	0.019484	0.035646	-0.027504	0.016005	0.035646
Pf3D7_06_v3	854910	857362	Pf3D7_06_v3	PF3D7_0620500	cleavage stimulation factor subunit 1, putative	-0.040368	0.003345	0.025725	-0.023322	0.024498	-0.043508	0.01788	0.058181	0.038091	0.068768	0.050378	0.038091
Pf3D7_06_v3	857476	858818	Pf3D7_06_v3	PF3D7_0620600	conserved Plasmodium protein, unknown function	-0.081467	-0.150447	-0.124183	-0.086385	-0.069259	-0.099491	-0.108026	-0.006335	-0.02412	-0.124751	-0.073134	-0.02412
Pf3D7_06_v3	858819	860364	Pf3D7_06_v3	PF3D7_0620700	DnaJ protein, putative	0.002701	0.035315	-0.011896	-0.000285	0.070991	-0.001745	-0.002422	0.021163	0.015144	0.140343	0.028027	0.015144
Pf3D7_06_v3	862632	865630	Pf3D7_06_v3	PF3D7_0621000	conserved Plasmodium protein, unknown function	-0.038274	-0.0895	-0.033337	-0.10298	-0.054499	-0.084124	-0.112821	-0.023026	0.030559	-0.168725	0.009461	0.030559
Pf3D7_06_v3	865631	870159	Pf3D7_06_v3	PF3D7_0621100	conserved Plasmodium protein, unknown function	-0.014232	0.028635	0.023151	0.008816	0.030034	-0.002871	0.000102	0.002712	0.02763	0.076676	0.006646	0.02763
Pf3D7_06_v3	871047	872452	Pf3D7_06_v3	PF3D7_0621200	pyridoxine biosynthesis protein PDX1	-0.005355	0.017842	-0.02587	0.046837	0.038507	-0.045764	-0.09093	0.057046	0.08789	-0.117527	0.063525	0.08789
Pf3D7_06_v3	873559	876440	Pf3D7_06_v3	PF3D7_0621300	mRNA-binding protein PUF3	-0.128755	-0.015081	-0.029751	-0.055098	-0.019399	0.024878	0.036654	0.014286	-0.013111	-0.028913	-0.031014	-0.013111
Pf3D7_06_v3	878540	881034	Pf3D7_06_v3	PF3D7_0621400	Pf77 protein	-0.054508	-0.010348	-0.009688	-0.006983	-0.012621	-0.043918	-0.009789	-0.092017	-0.010338	0.056313	0.00865	-0.010338
Pf3D7_06_v3	881713	883244	Pf3D7_06_v3	PF3D7_0621500	ribonuclease P/MRP protein subunit RPP1, putative	-0.122834	-0.054687	0.02647	-0.027231	0.049247	-0.006602	0.095776	0.004894	0.017075	-0.125602	-0.069527	0.017075
Pf3D7_06_v3	884178	889864	Pf3D7_06_v3	PF3D7_0621700	conserved Plasmodium protein, unknown function	-0.038047	-0.003852	-0.01742	-0.018056	-0.002213	0.016763	-0.019168	0.028836	-0.056206	-0.047779	-0.019912	-0.056206
Pf3D7_06_v3	891747	893027	Pf3D7_06_v3	PF3D7_0621800	nascent polypeptide-associated complex subunit alpha, putative	0.061299	0.084282	0.09262	0.194917	0.076934	0.121033	0.086209	0.112686	0.065791	0.215579	0.050612	0.065791
Pf3D7_06_v3	893200	896030	Pf3D7_06_v3	PF3D7_0621900	signal recognition particle subunit SRP68, putative	0.003374	0.028943	0.014003	0.049923	-0.027447	0.075	-0.045299	0.0813	0.014883	0.082244	-0.012634	0.014883
Pf3D7_06_v3	896739	898154	Pf3D7_06_v3	PF3D7_0622000	conserved Plasmodium protein, unknown function	0.074366	0.051852	-0.07612	0.046009	0.012592	-0.002605	-0.072733	-0.037256	-0.007187	-0.150621	0.032714	-0.007187
Pf3D7_06_v3	898155	902613	Pf3D7_06_v3	PF3D7_0622100	conserved Plasmodium protein, unknown function	0.016373	0.024681	-0.02474	0.094076	0.007967	0.016129	0.014388	0.051243	0.036987	-0.062301	0.011792	0.036987
Pf3D7_06_v3	903490	906572	Pf3D7_06_v3	PF3D7_0622200	radical SAM protein, putative	-0.020594	0.037778	-0.041695	0.030165	-0.032445	0.002864	0.014737	-0.006803	0.001007	0.010934	-0.032632	0.001007
Pf3D7_06_v3	907767	911299	Pf3D7_06_v3	PF3D7_0622300	vacuolar transporter chaperone, putative	-0.008457	0.04737	-0.017956	0.000418	0.007275	0.033007	-0.016646	-0.040244	-0.094364	-0.131932	-0.056987	-0.094364
Pf3D7_06_v3	912156	913960	Pf3D7_06_v3	PF3D7_0622500	RNA methyltransferase, putative	0.061764	0.030241	-0.030749	0.03369	-0.021948	0.026958	0.038933	0.009396	0.041453	0.030187	0.019648	0.041453
Pf3D7_06_v3	914493	915679	Pf3D7_06_v3	PF3D7_0622600	cytochrome b-c1 complex subunit 9, putative	0.043118	0.109529	0.099489	0.031251	0.06022	0.061668	0.143655	0.043684	-0.056363	-0.036306	0.054839	-0.056363
Pf3D7_06_v3	915750	917549	Pf3D7_06_v3	PF3D7_0622700	conserved Plasmodium membrane protein, unknown function	-0.026193	-0.033826	-0.072566	-0.042661	-0.074535	-0.142962	-0.070424	-0.098571	-0.062105	-0.249444	-0.164013	-0.062105
Pf3D7_06_v3	919435	924278	Pf3D7_06_v3	PF3D7_0622800	leucine--tRNA ligase, putative	0.019085	0.026458	-0.053203	-0.000992	-0.022446	-0.06438	0.002513	-0.009841	-0.049697	0.032014	-0.034472	-0.049697
Pf3D7_06_v3	924855	931324	Pf3D7_06_v3	PF3D7_0622900	AP2 domain transcription factor AP2Tel	0.041022	0.063228	0.039835	0.080924	0.05299	0.022547	0.053258	0.072189	0.006785	-0.085518	0.032319	0.006785
Pf3D7_06_v3	936818	938901	Pf3D7_06_v3	PF3D7_0623000	chorismate synthase	-0.06969	-0.055793	-0.002778	-0.004624	-0.03846	-0.035422	-0.005008	0.004219	-0.076028	-0.044276	-0.0909	-0.076028
Pf3D7_06_v3	939410	943970	Pf3D7_06_v3	PF3D7_0623100	nuclear polyadenylated RNA-binding protein NAB2, putative	-0.025968	0.02022	0.054552	-0.008382	0.052811	0.03866	0.090987	0.05783	0.077997	0.08639	0.053047	0.077997
Pf3D7_06_v3	945879	947368	Pf3D7_06_v3	PF3D7_0623200	ferredoxin--NADP reductase	-0.037596	-0.01942	-0.043876	-0.040148	-0.040906	-0.014647	-0.020486	-0.0664	-0.037258	-0.026794	-0.0233	-0.037258
Pf3D7_06_v3	947369	948894	Pf3D7_06_v3	PF3D7_0623300	EGF-like membrane protein, putative	-0.005831	0.061524	0.137686	0.039408	0.003747	0.091994	0.075662	0.050988	0.009223	-0.140337	-0.037496	0.009223
Pf3D7_06_v3	949973	951756	Pf3D7_06_v3	PF3D7_0623400	MEI2-like RNA-binding protein, putative	-0.083836	-0.113273	-0.082038	-0.020392	-0.050418	-0.096062	-0.044276	-0.041258	-0.146588	-0.223024	-0.093717	-0.146588
Pf3D7_06_v3	952656	955098	Pf3D7_06_v3	PF3D7_0623500	superoxide dismutase [Fe]	0.031351	0.119177	-0.017701	0.072474	0.067897	0.015078	0.055267	0.041459	0.031134	0.039198	0.111176	0.031134
Pf3D7_06_v3	956515	958944	Pf3D7_06_v3	PF3D7_0623600	transcription or splicing factor-like protein, putative	-0.084447	-0.016322	0.001209	-0.017336	-0.007937	-0.029162	-0.020713	-0.052944	-0.012502	0.016396	0.006379	-0.012502
Pf3D7_06_v3	958945	962795	Pf3D7_06_v3	PF3D7_0623700	ATP-dependent RNA helicase SUV3, putative	0.005485	-0.097681	-0.043501	0.03275	0.013303	-0.020017	-0.02158	-0.036958	0.041802	-0.088223	0.006156	0.041802
Pf3D7_06_v3	963491	971205	Pf3D7_06_v3	PF3D7_0623800	tyrosine kinase-like protein, putative	-0.012213	0.001352	-0.034344	-0.034545	0.017856	-0.038789	0.006861	0.009551	-0.077367	-0.122657	-0.028914	-0.077367
Pf3D7_06_v3	976933	978299	Pf3D7_06_v3	PF3D7_0623900	ribonuclease H2 subunit A, putative	-0.02148	-0.015996	0.004658	-0.076384	-0.014291	-0.032096	-0.04187	-0.007312	-0.048359	-0.03957	-0.012211	-0.048359
Pf3D7_06_v3	980816	982797	Pf3D7_06_v3	PF3D7_0624000	hexokinase	-0.022048	0.040174	0.005716	-0.065687	-0.01785	0.039379	0.018966	0.036666	-0.075053	-0.06246	-0.045971	-0.075053
Pf3D7_06_v3	983696	985018	Pf3D7_06_v3	PF3D7_0624100	conserved protein, unknown function	-0.042737	-0.066254	-0.119912	-0.121907	-0.085057	-0.033163	0.020409	-0.094123	-0.09244	-0.124939	-0.103257	-0.09244
Pf3D7_06_v3	985019	987120	Pf3D7_06_v3	PF3D7_0624200	conserved Plasmodium protein, unknown function	0.009588	-0.043459	0.016446	-0.014737	-0.056104	-0.021627	0.00709	0.002833	-0.106339	-0.064209	-0.059309	-0.106339
Pf3D7_06_v3	987558	989886	Pf3D7_06_v3	PF3D7_0624300	CPW-WPC family protein	0.032602	0.055588	-0.024719	0.095163	0.068142	0.016904	0.023097	0.047275	-0.001419	-0.044427	0.058974	-0.001419
Pf3D7_06_v3	990125	992448	Pf3D7_06_v3	PF3D7_0624400	conserved protein, unknown function	-0.048798	-0.069192	-0.07142	-0.065718	-0.013461	-0.031729	-0.079899	-0.03101	-0.032933	-0.160128	-0.024464	-0.032933
Pf3D7_06_v3	994034	994803	Pf3D7_06_v3	PF3D7_0624500	anaphase-promoting complex subunit 11, putative	-0.027478	0.068107	0.025666	-0.00525	0.063445	0.029354	-0.012072	0.043728	0.051832	-0.050075	0.011238	0.051832
Pf3D7_06_v3	999274	1007933	Pf3D7_06_v3	PF3D7_0624600	SNF2 helicase, putative	-0.008206	0.03875	0.040974	0.011194	0.011334	0.009396	0.011943	0.005241	-0.050524	-0.055788	-0.051329	-0.050524
Pf3D7_06_v3	1009207	1010968	Pf3D7_06_v3	PF3D7_0624700	N-acetylglucosaminyl-phosphatidylinositol de-N-acetylase, putative	0.097302	0.060534	-0.006536	0.026298	0.038681	0.057015	0.004812	0.049507	0.008562	-0.102356	0.004792	0.008562
Pf3D7_06_v3	1011179	1014819	Pf3D7_06_v3	PF3D7_0624800	conserved Plasmodium protein, unknown function	0.055687	0.02122	-0.065933	-0.007204	0.005136	7.7e-05	0.040108	0.016344	-0.12094	-0.115666	-0.059433	-0.12094
Pf3D7_06_v3	1015618	1018694	Pf3D7_06_v3	PF3D7_0624900	GAS8-like protein, putative	0.079506	0.041519	-0.016952	0.023253	0.051877	0.020693	-0.020055	0.065183	0.012717	0.024976	-0.009557	0.012717
Pf3D7_06_v3	1019774	1022125	Pf3D7_06_v3	PF3D7_0625000	sphingomyelin synthase 1, putative	-0.06353	-0.02654	-0.040139	-0.019094	-0.040623	-0.056893	-0.063555	-0.089389	-0.098852	-0.11784	-0.173179	-0.098852
Pf3D7_06_v3	1022765	1024464	Pf3D7_06_v3	PF3D7_0625100	sphingomyelin synthase 2, putative	0.09765	-0.095548	-0.085618	0.109287	0.009318	-0.013363	0.004718	0.032941	0.038848	-0.03824	-0.067907	0.038848
Pf3D7_06_v3	1024929	1026579	Pf3D7_06_v3	PF3D7_0625200	conserved Plasmodium protein, unknown function	0.02964	0.033685	-0.03245	0.047375	-0.007008	-0.089466	-0.033561	-0.00019	-0.035688	-0.017192	-0.051121	-0.035688
Pf3D7_06_v3	1026580	1031407	Pf3D7_06_v3	PF3D7_0625300	DNA polymerase 1, putative	-0.013854	-0.030721	-0.026523	0.00044	0.029378	-0.007512	-0.055628	-0.001172	-0.09542	-0.133844	-0.076292	-0.09542
Pf3D7_06_v3	1032286	1034024	Pf3D7_06_v3	PF3D7_0625400	conserved Plasmodium protein, unknown function	-0.129611	-0.117001	-0.11005	-0.174674	-0.042376	-0.135379	-0.066634	-0.083114	-0.226813	-0.194404	-0.1978	-0.226813
Pf3D7_06_v3	1035108	1036621	Pf3D7_06_v3	PF3D7_0625500	conserved Plasmodium membrane protein, unknown function	-0.02563	-0.045624	-0.109492	-0.073986	-0.125525	0.008075	-0.09807	-0.057624	-0.081836	-0.031184	-0.189752	-0.081836
Pf3D7_06_v3	1039405	1041800	Pf3D7_06_v3	PF3D7_0625600	poly(A) polymerase PAP, putative	0.031649	0.014058	-0.064741	0.016556	-0.024064	-0.077848	-0.001449	-0.021602	-0.065964	-0.052935	-0.093247	-0.065964
Pf3D7_06_v3	1043296	1045724	Pf3D7_06_v3	PF3D7_0625800	conserved Plasmodium protein, unknown function	0.027428	-0.075648	-0.064493	0.038499	-0.053692	-0.087549	-0.055028	-0.063676	0.000116	-0.069268	-0.045238	0.000116
Pf3D7_06_v3	1046736	1048302	Pf3D7_06_v3	PF3D7_0625900	conserved Plasmodium protein, unknown function	0.034353	0.067415	-0.095426	0.010301	-0.077409	-0.124622	-0.135904	-0.024365	-0.081233	-0.064145	-0.082328	-0.081233
Pf3D7_06_v3	1048460	1054215	Pf3D7_06_v3	PF3D7_0626000	conserved Plasmodium protein, unknown function	0.051851	-0.022359	0.006341	-0.000369	0.015499	-0.034232	-0.030231	0.016762	-0.024363	-0.185203	-0.004587	-0.024363
Pf3D7_06_v3	1055802	1058597	Pf3D7_06_v3	PF3D7_0626100	oxidoreductase, short-chain dehydrogenase family, putative	-0.016666	0.026528	0.049179	0.054303	0.066875	-0.023979	0.024649	0.018455	-0.032549	0.12193	-0.018521	-0.032549
Pf3D7_06_v3	1058598	1060172	Pf3D7_06_v3	PF3D7_0626200	conserved Plasmodium protein, unknown function	0.074954	0.017441	0.02929	0.074095	0.084791	-0.03827	0.024807	-0.01601	0.026805	-0.189562	0.002136	0.026805
Pf3D7_06_v3	1060865	1063141	Pf3D7_06_v3	PF3D7_0626300	3-oxoacyl-acyl-carrier protein synthase I/II	-0.003782	-0.015552	-0.030939	0.004649	-0.010431	-0.057038	-0.002635	0.005511	-0.031684	-0.050909	-0.042469	-0.031684
Pf3D7_06_v3	1064897	1068876	Pf3D7_06_v3	PF3D7_0626400	CRAL/TRIO domain-containing protein, putative	0.056534	0.031143	0.039758	0.035906	0.02778	-0.029894	0.048013	0.039092	0.054518	0.008141	0.036195	0.054518
Pf3D7_06_v3	1069712	1073055	Pf3D7_06_v3	PF3D7_0626500	conserved Plasmodium protein, unknown function	0.126318	-0.007468	0.02007	0.045247	0.053024	0.03303	0.062649	0.017234	0.019156	0.077908	0.044924	0.019156
Pf3D7_06_v3	1073208	1074145	Pf3D7_06_v3	PF3D7_0626600	conserved Plasmodium protein, unknown function	0.179294	0.014122	0.010175	-0.120778	0.058617	-0.029622	0.084634	0.044701	-0.153664	0.010201	-0.076975	-0.153664
Pf3D7_06_v3	1074768	1076386	Pf3D7_06_v3	PF3D7_0626700	ATPase	-0.020308	-0.050143	-0.04789	-0.05536	0.008582	-0.103191	-0.008694	-0.041372	-0.083006	-0.066395	-0.086872	-0.083006
Pf3D7_06_v3	1078745	1081570	Pf3D7_06_v3	PF3D7_0626800	pyruvate kinase	0.031891	0.061926	0.047788	-0.001649	0.031665	0.052334	0.0256	0.083584	0.061233	0.039296	0.046047	0.061233
Pf3D7_06_v3	1082660	1084268	Pf3D7_06_v3	PF3D7_0626900	mitochondrial ribosomal protein L46 precursor, putative	-0.012919	-0.038565	-0.079278	-0.05414	-0.006719	-0.106586	-0.027985	-0.063706	-0.080616	-0.077715	-0.092111	-0.080616
Pf3D7_06_v3	1088940	1094578	Pf3D7_06_v3	PF3D7_0627100	ankyrin-repeat protein, putative	-0.073383	-0.038563	-0.085165	-0.078842	-0.08084	-0.043774	-0.049229	-0.067807	-0.107915	0.003179	-0.059013	-0.107915
Pf3D7_06_v3	1094815	1096623	Pf3D7_06_v3	PF3D7_0627200	myosin light chain, putative	0.035043	0.029255	0.092054	0.037847	0.03894	0.05617	-0.026515	0.00837	0.046349	0.024138	0.034797	0.046349
Pf3D7_06_v3	1097050	1098899	Pf3D7_06_v3	PF3D7_0627300	E3 ubiquitin-protein ligase RNF5, putative	-0.029221	-0.049513	0.007761	0.007047	-0.013612	-0.008018	0.034962	0.003148	-0.059136	-0.186668	0.007924	-0.059136
Pf3D7_06_v3	1100027	1101108	Pf3D7_06_v3	PF3D7_0627400	mitochondrial import inner membrane translocase subunit TIM22, putative	-0.094345	-0.090521	-0.043333	-0.081157	0.001304	-0.104255	-0.043944	0.04416	-0.079562	-0.089307	-0.093434	-0.079562
Pf3D7_06_v3	1101484	1103102	Pf3D7_06_v3	PF3D7_0627500	protein DJ-1	-0.146689	0.018526	0.023958	-0.039521	-0.011502	-0.036116	-0.015219	0.049019	-0.01651	0.021248	0.017198	-0.01651
Pf3D7_06_v3	1103765	1105449	Pf3D7_06_v3	PF3D7_0627600	conserved Plasmodium protein, unknown function	-0.051921	0.044351	0.008281	0.068098	0.004252	0.038658	0.082934	0.08997	-0.021134	0.003581	-0.026193	-0.021134
Pf3D7_06_v3	1107947	1111890	Pf3D7_06_v3	PF3D7_0627700	transportin	-0.02568	0.018052	0.002896	-0.046211	-0.023576	-0.043083	0.001591	0.000545	-0.021195	0.061777	-0.024559	-0.021195
Pf3D7_06_v3	1114294	1117787	Pf3D7_06_v3	PF3D7_0627800	acetyl-CoA synthetase, putative	-0.032754	-0.04132	0.004272	-0.058326	-0.040048	-0.076338	-0.059606	-0.04773	-0.035346	0.003611	-0.060295	-0.035346
Pf3D7_06_v3	1119337	1121108	Pf3D7_06_v3	PF3D7_0627900	ribonuclease P protein subunit p29, putative	-0.163109	-0.082591	-0.097743	-0.100228	-0.093413	-0.154927	-0.075181	-0.072292	-0.150858	-0.216608	-0.143461	-0.150858
Pf3D7_06_v3	1121440	1122461	Pf3D7_06_v3	PF3D7_0628000	6-pyruvoyltetrahydropterin synthase	0.019818	0.032931	0.077434	0.049002	0.017961	0.080225	0.108008	0.046829	0.041477	0.006593	-0.051744	0.041477
Pf3D7_06_v3	1122551	1153914	Pf3D7_06_v3	PF3D7_0628100	HECT-domain (ubiquitin-transferase), putative	-0.026395	-0.039191	0.027436	-0.012396	-0.021933	-0.053948	-0.035822	-0.010931	0.027113	0.069526	0.026727	0.027113
Pf3D7_06_v3	1159612	1169330	Pf3D7_06_v3	PF3D7_0628200	eukaryotic translation initiation factor 2-alpha kinase	-0.041659	-0.040371	-0.018329	-0.018026	-0.021105	-0.02975	-0.025785	-0.01554	-0.030558	0.00584	-0.020008	-0.030558
Pf3D7_06_v3	1170563	1173946	Pf3D7_06_v3	PF3D7_0628300	choline/ethanolaminephosphotransferase, putative	0.113771	0.04619	0.031433	0.095138	0.072904	0.005093	0.020042	0.073799	0.068493	0.072608	0.011065	0.068493
Pf3D7_06_v3	1176015	1178820	Pf3D7_06_v3	PF3D7_0628400	protease, putative	-0.077485	-0.065273	-0.026499	-0.038547	-0.047038	-0.092289	-0.025736	-0.028672	-0.117658	-0.057779	-0.053226	-0.117658
Pf3D7_06_v3	1178821	1180253	Pf3D7_06_v3	PF3D7_0628500	conserved Plasmodium protein, unknown function	-0.005867	-0.079777	-0.09415	-0.074558	-0.047042	-0.144722	-0.109969	-0.082293	-0.013706	-0.012868	0.041674	-0.013706
Pf3D7_06_v3	1180323	1182603	Pf3D7_06_v3	PF3D7_0628600	DNA methyltransferase 1-associated protein 1, putative	0.031024	0.065129	0.103288	0.079921	0.02834	0.085977	0.153998	0.105457	0.056206	0.149281	0.095028	0.056206
Pf3D7_06_v3	1183646	1185806	Pf3D7_06_v3	PF3D7_0628700	conserved Plasmodium protein, unknown function	0.021056	0.110242	0.16925	0.068642	0.019285	0.008786	-0.011652	0.066893	0.154524	0.089117	0.172957	0.154524
Pf3D7_06_v3	1185807	1188894	Pf3D7_06_v3	PF3D7_0628800	glutamyl-tRNA(Gln) amidotransferase subunit B	-0.021216	0.03881	-0.041922	-0.011582	-0.023532	-0.012541	0.027655	0.031832	-0.010174	-0.0602	0.008296	-0.010174
Pf3D7_06_v3	1189222	1194141	Pf3D7_06_v3	PF3D7_0628900	RAP protein, putative	0.038928	-0.013072	0.072194	0.004997	0.003859	0.001647	-0.068231	0.021496	0.040181	-0.053736	0.060035	0.040181
Pf3D7_06_v3	1194142	1195429	Pf3D7_06_v3	PF3D7_0629000	glucosamine 6-phosphate N-acetyltransferase	0.00926	-0.054051	0.016746	0.019077	0.068862	-0.011367	0.005555	-0.013762	-0.004781	0.022597	0.082028	-0.004781
Pf3D7_06_v3	1195791	1198288	Pf3D7_06_v3	PF3D7_0629100	nicotinate phosphoribosyltransferase, putative	0.017437	-0.066374	-0.029302	-0.082778	-0.104542	-0.098384	-0.012648	-0.042244	-0.142771	0.007355	-0.02492	-0.142771
Pf3D7_06_v3	1199603	1201245	Pf3D7_06_v3	PF3D7_0629200	DnaJ protein, putative	0.17906	0.13496	0.0282	0.119993	0.0994	0.080156	0.049512	0.075697	0.095126	0.085307	0.129778	0.095126
Pf3D7_06_v3	1204940	1208031	Pf3D7_06_v3	PF3D7_0629300	phospholipase, putative	-0.066873	-0.027057	-0.074384	-0.059563	-0.006662	-0.048739	0.055449	0.016715	-0.014393	0.020908	0.016017	-0.014393
Pf3D7_06_v3	1210170	1213012	Pf3D7_06_v3	PF3D7_0629400	polyadenylate-binding protein 3, putative	0.009677	-0.034827	-0.011638	-0.023366	-0.016289	-0.097904	0.01845	-0.027925	-0.009684	0.028933	-0.015816	-0.009684
Pf3D7_06_v3	1213698	1216255	Pf3D7_06_v3	PF3D7_0629500	amino acid transporter AAT1	0.009613	0.08535	0.135135	0.064564	0.083056	0.043844	-0.035811	0.021095	0.117913	0.228594	0.049351	0.117913
Pf3D7_06_v3	1218057	1219501	Pf3D7_06_v3	PF3D7_0629600	RNA-binding protein, putative	0.0242	-0.017171	0.00282	0.026539	-0.013332	-0.02482	-0.017253	0.007493	0.008755	-0.049061	0.019072	0.008755
Pf3D7_06_v3	1221691	1243172	Pf3D7_06_v3	PF3D7_0629700	SET domain protein, putative	0.056164	0.005163	-0.027176	0.056359	0.065167	-0.002162	0.126755	0.041211	0.039578	-0.015234	0.053193	0.039578
Pf3D7_06_v3	1243330	1247469	Pf3D7_06_v3	PF3D7_0629800	cullin-like protein, putative	0.119143	-0.008669	0.164128	0.130041	0.093073	0.044273	0.030743	0.058944	0.090944	0.126316	0.129543	0.090944
Pf3D7_06_v3	1250162	1251851	Pf3D7_06_v3	PF3D7_0629900	sec14-like cytosolic factor or phosphatidylinositol/phosphatidylcholine transfer protein, putative	0.129931	-0.009424	0.063271	0.102153	0.066903	0.039102	0.040191	0.054063	0.104565	0.263427	0.09866	0.104565
Pf3D7_06_v3	1251852	1254235	Pf3D7_06_v3	PF3D7_0630000	CPW-WPC family protein	0.071508	0.032181	0.012319	0.031478	0.023827	0.015657	-0.001437	0.062258	0.019046	-0.015514	0.040813	0.019046
Pf3D7_06_v3	1254657	1257190	Pf3D7_06_v3	PF3D7_0630100	conserved Plasmodium protein, unknown function	0.051606	0.044066	0.075835	0.076273	0.176639	0.099839	0.077865	0.110867	0.157856	0.237789	0.117068	0.157856
Pf3D7_06_v3	1258630	1260168	Pf3D7_06_v3	PF3D7_0630200	secreted ookinete protein, putative	0.014885	-0.019401	-0.09537	-0.024552	0.012801	-0.01946	-0.024478	-0.009684	0.028684	0.033731	0.017842	0.028684
Pf3D7_06_v3	1260169	1269846	Pf3D7_06_v3	PF3D7_0630300	DNA polymerase epsilon catalytic subunit A, putative	-0.000952	0.009581	-0.168627	0.027456	-0.006695	-0.038243	0.10701	0.056402	-0.032285	0.012268	0.002933	-0.032285
Pf3D7_06_v3	1272113	1273782	Pf3D7_06_v3	PF3D7_0630400	conserved Plasmodium protein, unknown function	0.008897	0.019965	-0.154931	-0.008505	0.007962	-0.052714	-0.005977	0.003062	-0.042892	-0.104534	-0.03617	-0.042892
Pf3D7_06_v3	1276079	1278075	Pf3D7_06_v3	PF3D7_0630500	ribosome biogenesis protein YTM1, putative	0.017703	0.038045	-0.159194	0.007303	0.043481	-0.014732	0.079668	0.055914	0.025112	-0.048439	0.045288	0.025112
Pf3D7_06_v3	1279570	1283496	Pf3D7_06_v3	PF3D7_0630600	conserved protein, unknown function	0.034145	-0.010141	-0.149614	0.027685	-0.009488	-0.024478	0.014866	0.051829	0.048089	0.134943	0.077531	0.048089
Pf3D7_06_v3	1284808	1287281	Pf3D7_06_v3	PF3D7_0630700	bifunctional methylenetetrahydrofolate dehydrogenase/cyclohydrolase, putative	0.040052	0.078543	-0.178572	0.08045	0.109175	-0.079207	0.121206	0.022528	0.055202	0.072623	0.059867	0.055202
Pf3D7_06_v3	1287987	1290920	Pf3D7_06_v3	PF3D7_0630800	TPH domain-containing protein, putative	-0.062286	-0.047091	-0.167795	-0.003945	-0.019297	-0.075879	-0.015604	-0.004134	0.073468	0.156111	-0.00977	0.073468
Pf3D7_06_v3	1290921	1293222	Pf3D7_06_v3	PF3D7_0630900	ATP-dependent RNA helicase HAS1	-0.130867	-0.006871	-6.82778	0.025023	0.038028	-0.005554	0.014718	-0.063778	0.184445	0.081336	0.067096	0.184445
Pf3D7_06_v3	1313458	1315503	Pf3D7_06_v3	PF3D7_0631200	erythrocyte membrane protein 1 (PfEMP1), pseudogene	0.00269	-0.060193	-7.6348	-0.051044	-0.066353	-0.043201	-0.066334	-0.079753	0.104629	-0.031863	0.097804	0.104629
Pf3D7_06_v3	1329521	1331213	Pf3D7_06_v3	PF3D7_0631800	rifin	-0.010201	-0.123259	-7.87166	-0.123194	-0.025244	-0.095851	-0.101796	-0.038436	0.06195	-0.013746	-0.001207	0.06195
Pf3D7_06_v3	1332763	1334285	Pf3D7_06_v3	PF3D7_0631900	stevor	0.001055	-0.109288	-7.40023	-0.082545	-0.072005	-0.101599	-0.08864	-0.109363	0.055065	0.025895	0.567446	0.055065
Pf3D7_06_v3	1337968	1339667	Pf3D7_06_v3	PF3D7_0632100	rifin	-0.011219	-0.102523	-7.00681	-0.107465	-0.107543	-0.016442	-0.123659	-0.045238	0.110124	-0.043671	0.667017	0.110124
Pf3D7_06_v3	1347091	1348821	Pf3D7_06_v3	PF3D7_0632300	rifin	-0.026564	-0.143659	-8.47422	-0.042028	-0.078976	-0.068299	-0.143848	-0.127823	0.123181	-0.049303	0.636839	0.123181
Pf3D7_06_v3	1353696	1366680	Pf3D7_06_v3	PF3D7_0632500	erythrocyte membrane protein 1, PfEMP1	0.056176	-0.130758	-7.98177	-0.090909	0.000455	-0.03765	-0.065738	-0.015174	0.213708	0.02007	0.725819	0.213708
Pf3D7_06_v3	1367662	1369357	Pf3D7_06_v3	PF3D7_0632600	rifin, pseudogene	0.004051	-0.182536	-8.36157	-0.014701	-0.122902	-0.121286	-0.183078	-0.108174	0.246258	0.053997	0.185786	0.246258
Pf3D7_06_v3	1371251	1373111	Pf3D7_06_v3	PF3D7_0632700	rifin	0.096006	0.074101	-0.7199	0.064587	0.037081	0.054679	-0.02895	0.129477	0.229025	0.170171	0.220356	0.229025
Pf3D7_06_v3	1374547	1382877	Pf3D7_06_v3	PF3D7_0632800	erythrocyte membrane protein 1, PfEMP1	0.019542	-0.120483	0.248511	-0.001846	-0.002392	-0.059271	-0.113811	-0.056112	0.135219	-0.071444	0.096355	0.135219
Pf3D7_07_v3	20057	28333	Pf3D7_07_v3	PF3D7_0700100	erythrocyte membrane protein 1, PfEMP1	-0.046271	-0.134466	0.216588	-0.06012	-0.086297	-0.16589	-0.142287	-0.11502	-0.024612	-0.091483	-0.074967	-0.024612
Pf3D7_07_v3	36672	38177	Pf3D7_07_v3	PF3D7_0700400	stevor	0.009388	-0.046903	0.061714	-0.101526	-0.037894	-0.054357	-0.074108	-0.08797	0.040836	0.016326	0.008798	0.040836
Pf3D7_07_v3	75668	77305	Pf3D7_07_v3	PF3D7_0701800	rifin	-0.043143	-0.076435	0.135459	-0.087175	-0.053821	-0.057169	-0.065622	-0.112714	-0.040385	-0.075934	-0.038712	-0.040385
Pf3D7_07_v3	79640	83193	Pf3D7_07_v3	PF3D7_0701900	Plasmodium exported protein, unknown function	-0.075012	-0.057594	0.092427	-0.130322	-0.096423	-0.100555	-0.090531	-0.141839	-0.121356	-0.049794	-0.047422	-0.121356
Pf3D7_07_v3	84547	85924	Pf3D7_07_v3	PF3D7_0702000	Plasmodium exported protein (hyp12), unknown function	-0.125022	-0.075989	-0.017265	-0.18209	-0.153467	-0.107689	-0.052449	-0.216671	0.050345	0.028601	-0.111816	0.050345
Pf3D7_07_v3	88435	91136	Pf3D7_07_v3	PF3D7_0702100	Plasmodium exported protein (PHISTb), unknown function, pseudogene	0.056161	0.093006	0.377419	0.081381	0.112935	0.107689	0.071306	0.007093	0.166759	0.078922	0.178916	0.166759
Pf3D7_07_v3	91617	93391	Pf3D7_07_v3	PF3D7_0702200	lysophospholipase, putative	-0.043923	-0.051057	0.208673	-0.039749	-0.044041	-0.06865	-0.015328	-0.131521	-0.004196	0.010846	0.026651	-0.004196
Pf3D7_07_v3	96511	98980	Pf3D7_07_v3	PF3D7_0702300	sporozoite threonine and asparagine-rich protein	-0.156625	-0.081826	0.212785	-0.059464	-0.010756	-0.13066	-0.097574	-0.263266	-0.034831	-0.043333	-0.058975	-0.034831
Pf3D7_07_v3	101444	102535	Pf3D7_07_v3	PF3D7_0702400	small exported membrane protein 1	-0.005828	-0.086499	0.148757	-0.074453	-0.075939	-0.067436	-0.120775	-0.093797	-0.034621	-0.145691	-0.099465	-0.034621
Pf3D7_07_v3	104707	106239	Pf3D7_07_v3	PF3D7_0702500	Plasmodium exported protein, unknown function	0.085004	-0.048076	-0.044835	-0.078504	0.028393	-0.067126	-0.083257	-0.098036	-0.025028	-0.076427	-0.052591	-0.025028
Pf3D7_07_v3	109665	110428	Pf3D7_07_v3	PF3D7_0702600	chitinase precursor fragment, truncated	0.00778	-0.024925	-0.045651	-0.058093	-0.015349	-0.1223	-0.034047	-0.052702	0.027884	-0.173121	-0.130227	0.027884
Pf3D7_07_v3	112894	114198	Pf3D7_07_v3	PF3D7_0702900	centrin, putative	0.021242	-0.044099	0.004076	-0.08931	-0.00793	-0.011171	0.008474	-0.004653	0.033039	-0.057844	-0.071228	0.033039
Pf3D7_07_v3	114989	121020	Pf3D7_07_v3	PF3D7_0703000	conserved Plasmodium protein, unknown function	-0.010403	-0.076278	-0.108481	-0.111502	-0.017928	-0.146172	-0.001468	-0.059842	-0.108732	-0.138619	-0.122554	-0.108732
Pf3D7_07_v3	121164	122206	Pf3D7_07_v3	PF3D7_0703100	cytosolic iron-sulfur assembly component 2, putative	0.024624	-0.044604	-0.052485	-0.070702	0.038053	-0.062629	0.026336	-0.068757	-0.096278	-0.217686	-0.131569	-0.096278
Pf3D7_07_v3	122263	127385	Pf3D7_07_v3	PF3D7_0703200	conserved Plasmodium protein, unknown function	0.054413	0.054806	0.052682	0.097016	0.071115	0.021508	0.018204	0.073597	0.06403	-0.083136	0.027485	0.06403
Pf3D7_07_v3	128290	129175	Pf3D7_07_v3	PF3D7_0703300	conserved Plasmodium protein, unknown function	0.035815	-0.106182	0.016162	-0.048255	0.133451	0.027667	-0.009338	-0.056	0.073652	0.030178	0.077569	0.073652
Pf3D7_07_v3	129176	132082	Pf3D7_07_v3	PF3D7_0703400	conserved Plasmodium protein, unknown function	-0.032334	-0.028858	0.023844	-0.048643	-0.000152	-0.041819	-0.037231	-0.035069	-0.011647	-0.071548	-0.035394	-0.011647
Pf3D7_07_v3	135356	142755	Pf3D7_07_v3	PF3D7_0703500	erythrocyte membrane-associated antigen	-0.035287	0.053917	-0.00956	-0.016071	0.013096	0.023915	0.042538	0.018291	0.043702	0.052937	0.019699	0.043702
Pf3D7_07_v3	143769	146203	Pf3D7_07_v3	PF3D7_0703600	conserved protein, unknown function	0.067764	0.021305	0.034232	0.007856	0.039567	0.079182	0.122818	0.072255	0.082996	0.065438	0.035913	0.082996
Pf3D7_07_v3	146395	147644	Pf3D7_07_v3	PF3D7_0703700	conserved protein, unknown function	-0.027623	-0.037906	-0.07032	-0.077269	-0.061833	-0.051849	-0.000391	-0.054129	-0.06076	-0.037424	-0.027437	-0.06076
Pf3D7_07_v3	149554	153150	Pf3D7_07_v3	PF3D7_0703800	conserved Plasmodium protein, unknown function	0.003514	0.011098	0.06892	0.014298	0.030647	0.022387	-0.003076	0.038966	-0.019162	0.055385	0.013569	-0.019162
Pf3D7_07_v3	153151	166646	Pf3D7_07_v3	PF3D7_0703900	conserved Plasmodium membrane protein, unknown function	0.082295	0.044616	0.050157	0.123945	0.093565	0.005212	0.062522	0.096369	0.036509	0.11497	0.045745	0.036509
Pf3D7_07_v3	167239	177545	Pf3D7_07_v3	PF3D7_0704000	conserved Plasmodium membrane protein, unknown function	0.114691	0.050366	0.081767	0.036309	0.079843	0.091367	0.006614	0.093564	0.063605	0.050351	0.088952	0.063605
Pf3D7_07_v3	179786	190965	Pf3D7_07_v3	PF3D7_0704100	conserved Plasmodium membrane protein, unknown function	0.026962	0.025735	0.054615	0.046004	0.009493	0.021943	0.004943	0.020033	0.047681	0.064711	0.085328	0.047681
Pf3D7_07_v3	191059	195140	Pf3D7_07_v3	PF3D7_0704200	tRNA m5C-methyltransferase, putative	0.013233	-0.05109	-0.017888	0.021799	0.016837	-0.068705	-0.041781	-0.031642	-0.049159	-0.040318	-0.020383	-0.049159
Pf3D7_07_v3	197441	203499	Pf3D7_07_v3	PF3D7_0704300	conserved Plasmodium membrane protein, unknown function	0.007293	-0.053462	0.001224	-0.002973	0.008147	-0.014181	-0.015287	0.02048	-0.028502	-0.040823	-0.013247	-0.028502
Pf3D7_07_v3	204468	208000	Pf3D7_07_v3	PF3D7_0704400	phosphoinositide-binding protein, putative	0.023044	-0.048791	0.023142	-0.021593	0.006921	-0.036657	-0.000303	0.010494	0.000816	-0.085573	0.005459	0.000816
Pf3D7_07_v3	208440	213751	Pf3D7_07_v3	PF3D7_0704500	serine/threonine protein kinase, putative	0.073981	0.060402	0.081984	0.073184	0.048632	0.050381	0.01692	0.033335	0.037327	0.133142	0.036235	0.037327
Pf3D7_07_v3	215774	229322	Pf3D7_07_v3	PF3D7_0704600	E3 ubiquitin-protein ligase	0.02012	0.021515	0.014757	-0.001744	-0.005287	-0.02321	0.051548	0.040433	-0.021467	0.041417	-0.003211	-0.021467
Pf3D7_07_v3	233151	237664	Pf3D7_07_v3	PF3D7_0704700	phosphopantetheine adenylyltransferase, putative	-0.010697	-0.04508	-0.065252	-0.071684	-0.052797	-0.091815	-0.031911	-0.031066	-0.072595	-0.101616	-0.085011	-0.072595
Pf3D7_07_v3	237909	242302	Pf3D7_07_v3	PF3D7_0704800	protein phosphatase PPM12, putative	0.054272	0.053613	0.054716	0.015842	0.064418	0.051352	0.096333	0.070164	-0.020219	0.011941	0.006433	-0.020219
Pf3D7_07_v3	243648	245266	Pf3D7_07_v3	PF3D7_0704900	peptide chain release factor 2	0.007464	0.024749	0.0588	0.025002	0.025093	0.01498	0.016669	0.019881	-0.015384	0.014604	0.031531	-0.015384
Pf3D7_07_v3	246009	250402	Pf3D7_07_v3	PF3D7_0705000	mRNA cap guanine-N7 methyltransferase, putative	0.01941	0.006676	0.068175	0.021816	0.006637	-0.015716	-0.092176	-0.023964	0.076366	0.068333	0.032343	0.076366
Pf3D7_07_v3	252032	255501	Pf3D7_07_v3	PF3D7_0705100	conserved Plasmodium protein, unknown function	-0.017125	0.011614	0.064797	-0.010953	0.028794	-0.010118	0.012177	0.066172	0.063311	-0.017407	0.073192	0.063311
Pf3D7_07_v3	255836	260934	Pf3D7_07_v3	PF3D7_0705200	conserved Plasmodium protein, unknown function	-0.038043	-0.078878	-0.005672	-0.043052	-0.092633	-0.072268	-0.062803	-0.074564	-0.091271	-0.048795	-0.055568	-0.091271
Pf3D7_07_v3	261727	264704	Pf3D7_07_v3	PF3D7_0705300	origin recognition complex subunit 2	0.018077	0.008938	-0.013379	0.003851	-0.029674	-0.022194	-0.048216	-0.015928	-0.039537	-0.140848	-0.030338	-0.039537
Pf3D7_07_v3	264723	267688	Pf3D7_07_v3	PF3D7_0705400	DNA replication licensing factor MCM7	-0.004589	-0.016835	0.019266	-0.022074	-0.035046	0.008409	-0.030573	0.005213	-0.030202	-0.007688	-0.034558	-0.030202
Pf3D7_07_v3	269772	278956	Pf3D7_07_v3	PF3D7_0705500	inositol-phosphate phosphatase, putative	-0.017539	-0.084348	-0.005544	-0.061898	-0.017622	-0.026425	-0.0405	-0.017622	-0.062169	-0.141889	-0.049975	-0.062169
Pf3D7_07_v3	280785	284683	Pf3D7_07_v3	PF3D7_0705600	RNA helicase, putative	0.002466	-0.054684	0.001412	-0.075565	-0.034799	-0.064866	-0.006436	-0.020705	0.034342	-0.040147	0.009	0.034342
Pf3D7_07_v3	285222	286416	Pf3D7_07_v3	PF3D7_0705700	40S ribosomal protein S29, putative	-0.00141	-0.038776	0.096868	-0.010306	-0.017578	-0.016111	-0.037491	-0.013424	0.011279	-0.046473	0.02292	0.011279
Pf3D7_07_v3	287347	289338	Pf3D7_07_v3	PF3D7_0705800	cysteine-rich secretory protein, putative	0.024398	-0.009247	0.053625	0.031713	0.015804	0.025101	0.058086	0.027672	0.003205	0.027444	0.023764	0.003205
Pf3D7_07_v3	289850	291470	Pf3D7_07_v3	PF3D7_0705900	ATP synthase subunit C, putative	0.063135	0.016488	0.027937	0.029626	0.044486	-0.009943	0.00878	0.065126	-0.007517	-0.014774	0.052492	-0.007517
Pf3D7_07_v3	293150	297297	Pf3D7_07_v3	PF3D7_0706000	importin-7, putative	0.069703	-0.118046	-0.002426	-0.102327	-0.031547	-0.073339	-0.098099	-0.01096	-0.164145	-0.252927	-0.001509	-0.164145
Pf3D7_07_v3	297298	303309	Pf3D7_07_v3	PF3D7_0706100	conserved Plasmodium protein, unknown function	0.045277	-0.025145	-0.036415	0.025512	-0.053515	-0.062598	-0.139408	0.036179	0.036427	-0.160909	-0.015151	0.036427
Pf3D7_07_v3	305313	306282	Pf3D7_07_v3	PF3D7_0706300	conserved Plasmodium protein, unknown function	0.079699	0.190475	0.152446	0.173939	0.124091	0.069756	0.143191	0.126224	0.158771	0.138326	0.122324	0.158771
Pf3D7_07_v3	309652	315272	Pf3D7_07_v3	PF3D7_0706500	conserved Plasmodium protein, unknown function	0.039822	-0.022173	0.031957	0.017201	0.006712	-0.003628	0.022264	0.000298	-0.000165	-0.108017	-0.043324	-0.000165
Pf3D7_07_v3	319998	322531	Pf3D7_07_v3	PF3D7_0706600	conserved Plasmodium protein, unknown function	-0.061312	-0.067318	-0.107395	-0.06364	-0.062483	-0.039519	-0.15362	-0.092933	-0.047234	-0.151742	-0.070535	-0.047234
Pf3D7_07_v3	322657	325778	Pf3D7_07_v3	PF3D7_0706700	DNA mismatch repair protein MSH2, putative	0.032189	-0.00646	-0.058973	-0.032566	0.048921	-0.04123	0.029498	0.018122	-0.036204	-0.048324	-0.031046	-0.036204
Pf3D7_07_v3	329686	336575	Pf3D7_07_v3	PF3D7_0707200	conserved Plasmodium protein, unknown function	-0.038843	-0.019386	0.086651	-0.037909	0.032454	-0.003968	0.067857	0.067904	0.067825	0.037457	-0.002154	0.067825
Pf3D7_07_v3	338635	342333	Pf3D7_07_v3	PF3D7_0707300	rhoptry-associated membrane antigen	-0.066042	-0.079569	-0.057057	-0.019523	-0.00756	-0.048858	-0.064246	-0.037587	-0.046414	-0.066535	-0.035878	-0.046414
Pf3D7_07_v3	343662	346153	Pf3D7_07_v3	PF3D7_0707400	AAA family ATPase, putative	-0.056377	-0.05717	-0.026103	-0.0396	0.011108	0.000686	-0.024559	-0.014364	0.003133	-0.048611	-0.038828	0.003133
Pf3D7_07_v3	348027	353332	Pf3D7_07_v3	PF3D7_0707500	conserved Plasmodium protein, unknown function	0.005374	0.080115	-0.000606	0.03224	0.030773	-0.02521	0.006727	0.035819	0.009116	-0.073749	0.0184	0.009116
Pf3D7_07_v3	353736	354970	Pf3D7_07_v3	PF3D7_0707600	mediator of RNA polymerase II transcription subunit 10, putative	0.053402	0.021151	-0.036033	-0.014453	0.026124	-0.034133	-0.009399	0.01764	-0.050167	-0.059689	-0.004755	-0.050167
Pf3D7_07_v3	357450	360835	Pf3D7_07_v3	PF3D7_0707700	E3 ubiquitin-protein ligase, putative	-0.012513	-0.029077	0.002053	-0.023809	-0.031557	0.010835	0.00343	0.057544	-0.027349	-0.191165	-0.075741	-0.027349
Pf3D7_07_v3	361755	366029	Pf3D7_07_v3	PF3D7_0707800	RAP protein, putative	0.121869	0.053365	-0.094745	0.044118	0.030241	-0.09693	-0.064044	0.066823	-0.081072	-0.140005	-0.011994	-0.081072
Pf3D7_07_v3	366679	367958	Pf3D7_07_v3	PF3D7_0707900	ribosomal protein S8e, putative	0.011947	-0.054953	-0.037788	0.001959	0.005234	-0.01961	-0.027531	-0.015016	0.020098	0.004855	-0.019024	0.020098
Pf3D7_07_v3	368457	371922	Pf3D7_07_v3	PF3D7_0708000	cytoskeleton associated protein, putative	0.022252	0.037266	0.004347	0.070788	0.080644	0.011411	0.106422	0.073295	0.077632	-0.008381	0.057102	0.077632
Pf3D7_07_v3	372647	373356	Pf3D7_07_v3	PF3D7_0708100	DNA-directed RNA polymerases I, II, and III subunit RPABC5, putative	0.067164	-0.001305	0.013042	-0.01108	0.010294	-0.073649	-0.133175	0.047914	0.002513	0.004423	0.045013	0.002513
Pf3D7_07_v3	373993	377643	Pf3D7_07_v3	PF3D7_0708200	conserved Plasmodium protein, unknown function	-0.018127	-0.057527	-0.030756	-0.053844	-0.028456	-0.010934	-0.007944	0.005712	-0.013462	0.047133	-0.00047	-0.013462
Pf3D7_07_v3	377781	379555	Pf3D7_07_v3	PF3D7_0708300	EKC/KEOPS complex subunit BUD32	-0.00666	-0.008259	-0.056262	0.005865	-0.027105	-0.050713	-0.037505	-0.02029	-0.06398	-0.160388	-0.07952	-0.06398
Pf3D7_07_v3	381342	384864	Pf3D7_07_v3	PF3D7_0708400	heat shock protein 90	-0.064121	-0.089404	-0.025159	-0.005928	-0.049485	-0.055999	-0.016967	-0.117273	-0.071343	-0.046279	-0.019668	-0.071343
Pf3D7_07_v3	385333	388571	Pf3D7_07_v3	PF3D7_0708500	heat shock protein 86 family protein	0.04432	0.038341	0.015378	0.026902	0.011551	0.0417	-0.066021	0.006945	0.002311	-0.035251	0.017155	0.002311
Pf3D7_07_v3	389223	390615	Pf3D7_07_v3	PF3D7_0708600	inner membrane complex protein 1d, putative	0.084321	0.033605	0.067647	0.009021	0.03008	0.02422	-0.027579	0.040964	0.063185	-0.014676	0.05763	0.063185
Pf3D7_07_v3	391252	392438	Pf3D7_07_v3	PF3D7_0708700	Cg8 protein	-0.108584	-0.121757	-0.064845	-0.013853	-0.053363	-0.022977	-0.140329	-0.072141	0.026758	-0.072469	-0.069495	0.026758
Pf3D7_07_v3	395461	398582	Pf3D7_07_v3	PF3D7_0708800	heat shock protein 110	0.043662	0.075676	0.070268	0.004057	0.084588	0.096436	0.047533	0.122749	0.066651	-0.006556	0.081659	0.066651
Pf3D7_07_v3	399040	400493	Pf3D7_07_v3	PF3D7_0708900	protein SCO1, putative	-0.018145	-0.029991	-0.036907	-0.082904	-0.090088	-0.081217	-0.050538	-0.040288	-0.044302	-0.047776	-0.079881	-0.044302
Pf3D7_07_v3	402972	406567	Pf3D7_07_v3	PF3D7_0709000	chloroquine resistance transporter	0.054593	0.056092	0.133877	0.074574	0.09893	0.133662	0.050881	0.105828	0.045621	0.086875	0.073741	0.045621
Pf3D7_07_v3	407965	412152	Pf3D7_07_v3	PF3D7_0709100	Cg1 protein	0.079721	0.044312	0.061538	0.063318	0.073088	0.073397	0.039102	0.079549	0.12233	0.040038	0.083086	0.12233
Pf3D7_07_v3	412153	413360	Pf3D7_07_v3	PF3D7_0709200	glutaredoxin-like protein	0.0059	0.006764	0.043045	0.015669	0.048865	0.031199	0.052863	0.059219	0.084818	0.06876	0.034241	0.084818
Pf3D7_07_v3	413361	421999	Pf3D7_07_v3	PF3D7_0709300	Cg2 protein	0.073205	-0.059198	-0.009771	0.029005	0.083336	0.018012	-0.031095	-0.008724	0.07288	-0.080023	0.014975	0.07288
Pf3D7_07_v3	422986	427484	Pf3D7_07_v3	PF3D7_0709400	Cg7 protein	-0.038863	-0.067527	-0.028933	-0.029576	-0.029643	-0.037648	-0.038209	-0.056074	-0.034358	-0.038002	0.016508	-0.034358
Pf3D7_07_v3	429607	434008	Pf3D7_07_v3	PF3D7_0709600	ribonucleases P/MRP protein subunit POP1, putative	-0.049148	-0.056886	-0.037005	-0.028415	-0.040576	-0.09063	-0.017964	0.00865	-0.076263	-0.075789	-0.081792	-0.076263
Pf3D7_07_v3	434839	436445	Pf3D7_07_v3	PF3D7_0709700	prodrug activation and resistance esterase	-0.063912	-0.055025	-0.069824	-0.027376	-0.08462	-0.041092	-0.076356	-0.046155	-0.012169	-0.073818	-0.049491	-0.012169
Pf3D7_07_v3	438326	446131	Pf3D7_07_v3	PF3D7_0709900	conserved protein, unknown function	-0.129338	-0.119303	-0.039775	-0.029957	-0.116432	-0.069231	-0.021139	-0.035362	-0.091124	-0.045874	-0.065002	-0.091124
Pf3D7_07_v3	447265	458746	Pf3D7_07_v3	PF3D7_0710000	conserved Plasmodium protein, unknown function	-0.060672	-0.059258	-0.04538	-0.028841	-0.041012	-0.045038	-0.016226	-0.031613	-0.038117	-0.037494	-0.057172	-0.038117
Pf3D7_07_v3	459807	461686	Pf3D7_07_v3	PF3D7_0710100	conserved protein, unknown function	-0.027588	-0.098791	-0.095998	-0.047157	-0.054257	-0.057805	-0.052135	-0.015608	-0.031621	-0.116558	-0.041936	-0.031621
Pf3D7_07_v3	462855	472087	Pf3D7_07_v3	PF3D7_0710200	conserved Plasmodium protein, unknown function	-0.038993	-0.102655	-0.073546	-0.028368	-0.072254	-0.146079	0.017369	-0.090138	-0.126018	-0.327809	-0.028051	-0.126018
Pf3D7_07_v3	472251	473791	Pf3D7_07_v3	PF3D7_0710300	conserved protein, unknown function	0.000468	-0.060731	-0.012652	-0.062725	-0.01685	-0.059018	-0.044498	-0.038499	-0.075304	-0.095012	-0.057185	-0.075304
Pf3D7_07_v3	474373	475918	Pf3D7_07_v3	PF3D7_0710400	DNA repair protein RAD14, putative	-0.071402	-0.028432	0.010267	-0.097338	-0.034611	-0.127112	-0.024792	-0.075328	-0.052941	0.000421	-0.058299	-0.052941
Pf3D7_07_v3	475919	477802	Pf3D7_07_v3	PF3D7_0710500	conserved protein, unknown function	0.005449	-0.063804	0.032462	-0.016307	-0.001314	0.085813	0.060774	-0.087568	-0.141625	-0.178224	-0.082257	-0.141625
Pf3D7_07_v3	478218	479388	Pf3D7_07_v3	PF3D7_0710600	60S ribosomal protein L34	0.038898	-0.06722	0.012354	0.099142	0.032923	0.039653	0.037444	0.021476	0.032211	0.074518	0.054831	0.032211
Pf3D7_07_v3	482451	484081	Pf3D7_07_v3	PF3D7_0710800	protein transport protein USE1, putative	0.055063	0.005189	0.003842	0.07525	0.064028	-0.038234	0.051875	0.048619	-0.047017	0.031688	0.136946	-0.047017
Pf3D7_07_v3	484588	486287	Pf3D7_07_v3	PF3D7_0710900	50S ribosomal protein L1, mitochondrial, putative	0.123646	0.027706	-0.026588	0.038249	0.016907	-0.090589	-0.014634	0.05783	-0.023036	-0.224243	-0.00682	-0.023036
Pf3D7_07_v3	487031	491220	Pf3D7_07_v3	PF3D7_0711000	AAA family ATPase, CDC48 subfamily	-0.086449	-0.07636	-0.07963	-0.024229	-0.096936	-0.086299	-0.03969	-0.044429	-0.111019	-0.117835	-0.102825	-0.111019
Pf3D7_07_v3	492269	493482	Pf3D7_07_v3	PF3D7_0711100	conserved protein, unknown function	-0.0296	-0.04655	-0.023546	-0.020433	-0.035074	-0.022832	0.01071	0.018962	-0.031377	0.006806	-0.014596	-0.031377
Pf3D7_07_v3	494988	498490	Pf3D7_07_v3	PF3D7_0711200	conserved Plasmodium protein, unknown function	-0.00412	-0.063757	-0.150799	-0.189722	0.020506	-0.118421	-0.013886	0.070774	-0.024414	-0.195643	-0.039755	-0.024414
Pf3D7_07_v3	499086	499945	Pf3D7_07_v3	PF3D7_0711300	conserved Plasmodium protein, unknown function	-0.03795	-0.032487	-0.066972	-0.034042	0.034272	0.03055	-0.015682	0.016475	-0.007502	0.030826	-0.060993	-0.007502
Pf3D7_07_v3	500158	502844	Pf3D7_07_v3	PF3D7_0711400	histone deacetylase complex subunit SAP18, putative	-0.162009	-0.244414	-0.060258	-0.135552	-0.175233	-0.179258	-0.140979	-0.103059	-0.196863	-0.254892	-0.147894	-0.196863
Pf3D7_07_v3	504995	507561	Pf3D7_07_v3	PF3D7_0711500	regulator of chromosome condensation, putative	-0.040971	-0.05679	-0.083941	-0.102314	-0.041312	-0.040212	-0.013681	0.007978	-0.073263	-0.073136	-0.103645	-0.073263
Pf3D7_07_v3	511700	519675	Pf3D7_07_v3	PF3D7_0711700	erythrocyte membrane protein 1, PfEMP1	-0.073262	-0.029372	-0.072057	-0.030611	-0.005576	-0.033854	-0.024461	-0.013098	0.030246	0.124019	0.018211	0.030246
Pf3D7_07_v3	527088	535381	Pf3D7_07_v3	PF3D7_0712000	erythrocyte membrane protein 1, PfEMP1	0.039305	0.075642	0.133887	0.048878	0.0278	0.033717	-0.003784	0.260558	0.219001	0.195285	0.194701	0.219001
Pf3D7_07_v3	542656	550770	Pf3D7_07_v3	PF3D7_0712300	erythrocyte membrane protein 1, PfEMP1	-0.056894	-0.098971	0.134427	-0.066516	-0.051653	0.011387	-0.000619	0.856036	0.136268	0.215211	0.218365	0.136268
Pf3D7_07_v3	551908	559328	Pf3D7_07_v3	PF3D7_0712400	erythrocyte membrane protein 1, PfEMP1	-0.083415	-0.008693	0.157842	-0.016608	-0.034716	-0.097214	-0.030546	0.682855	0.182378	0.067761	0.197538	0.182378
Pf3D7_07_v3	562656	564410	Pf3D7_07_v3	PF3D7_0712500	rifin, pseudogene	-0.237719	-0.184762	0.146856	-0.183084	-0.089358	-0.183756	-0.107755	-0.20748	-0.060089	-0.039158	0.018984	-0.060089
Pf3D7_07_v3	566476	574558	Pf3D7_07_v3	PF3D7_0712600	erythrocyte membrane protein 1, PfEMP1	-0.115029	-0.034041	0.256238	-0.047839	-0.051111	-0.076519	-0.045519	-0.095343	0.162017	0.040119	0.180991	0.162017
Pf3D7_07_v3	581136	589173	Pf3D7_07_v3	PF3D7_0712800	erythrocyte membrane protein 1, PfEMP1	-0.055777	0.056322	0.226181	-0.025665	-0.013079	0.007187	0.024626	-0.013078	0.155226	0.095003	0.174545	0.155226
Pf3D7_07_v3	590076	597983	Pf3D7_07_v3	PF3D7_0712900	erythrocyte membrane protein 1, PfEMP1	-0.09067	-0.112117	-0.015225	-0.078157	-0.078882	-0.127437	-0.043789	-0.033461	0.130322	0.00157	0.146604	0.130322
Pf3D7_07_v3	601891	603631	Pf3D7_07_v3	PF3D7_0713000	rifin	-0.012955	0.072281	0.185838	0.006686	-0.00297	0.030174	-0.018924	0.010668	0.222192	0.221595	0.214476	0.222192
Pf3D7_07_v3	605403	606690	Pf3D7_07_v3	PF3D7_0713100	Pfmc-2TM Maurer's cleft two transmembrane protein	-0.009841	0.078158	0.237392	0.024272	0.003129	0.032204	0.020104	0.047328	0.232334	0.220462	0.22801	0.232334
Pf3D7_07_v3	606861	608035	Pf3D7_07_v3	PF3D7_0713200	exported protein family 1	-0.013928	0.100496	0.27756	0.041129	0.039494	0.084982	0.048616	0.051817	0.251794	0.252545	0.253816	0.251794
Pf3D7_07_v3	609047	610772	Pf3D7_07_v3	PF3D7_0713300	erythrocyte membrane protein 1 (PfEMP1), pseudogene	-0.077712	-0.06879	-0.016425	-0.00484	-0.0534	-0.060191	-0.075907	0.013297	-0.023804	0.024563	-0.034002	-0.023804
Pf3D7_07_v3	612208	613990	Pf3D7_07_v3	PF3D7_0713400	GPCR-like receptor SR25	0.005068	0.001147	0.003743	-0.005042	0.000389	-0.008908	0.010114	-0.006461	0.076131	0.131124	0.00018	0.076131
Pf3D7_07_v3	614135	617499	Pf3D7_07_v3	PF3D7_0713500	conserved Plasmodium protein, unknown function	-0.045695	-0.0948	-0.138156	-0.004109	-0.042956	-0.116974	-0.11671	-0.075344	-0.053254	-0.022607	-0.101428	-0.053254
Pf3D7_07_v3	617683	621117	Pf3D7_07_v3	PF3D7_0713600	mitochondrial ribosomal protein S5 precursor, putative	-0.033299	-0.070581	-0.070003	0.003001	0.007158	-0.061936	-0.037511	-0.038599	-0.06121	-0.027056	-0.098835	-0.06121
Pf3D7_07_v3	621213	623771	Pf3D7_07_v3	PF3D7_0713700	conserved Plasmodium protein, unknown function	0.004335	0.00961	-0.088115	0.036443	0.03147	0.009289	-0.058895	0.034492	0.051313	0.059837	0.040754	0.051313
Pf3D7_07_v3	624129	625550	Pf3D7_07_v3	PF3D7_0713800	negative elongation factor A, putative	0.064106	0.005057	-0.069419	-0.05138	-0.01088	-0.001903	0.036106	-0.012319	0.011536	-0.062344	-0.006005	0.011536
Pf3D7_07_v3	626817	638026	Pf3D7_07_v3	PF3D7_0713900	conserved Plasmodium protein, unknown function	0.010382	-0.025176	-0.049046	-0.002415	-0.012608	-0.029154	-0.045094	0.000638	-0.003058	0.055874	-0.025772	-0.003058
Pf3D7_07_v3	642851	643722	Pf3D7_07_v3	PF3D7_0714000	histone H2B variant	0.114573	0.088451	0.096247	0.077521	0.050358	0.030959	-0.017036	0.087207	0.001291	-0.030428	0.053663	0.001291
Pf3D7_07_v3	646469	649017	Pf3D7_07_v3	PF3D7_0714100	MAATS1 domain-containing protein, putative	-0.071683	-0.126289	0.002474	-0.038672	-0.095867	-0.099257	-0.09985	-0.05282	-0.1103	-0.158994	-0.074225	-0.1103
Pf3D7_07_v3	650584	655169	Pf3D7_07_v3	PF3D7_0714200	conserved Plasmodium protein, unknown function	0.044261	-0.022001	-0.015794	0.063602	0.043616	0.010405	0.01418	0.014907	0.01994	-0.049883	0.018333	0.01994
Pf3D7_07_v3	656621	661919	Pf3D7_07_v3	PF3D7_0714300	palmitoyltransferase DHHC4, putative	0.02639	0.012288	-0.071563	0.136948	0.004398	0.065008	-0.074607	0.069439	0.041094	0.044061	-0.030117	0.041094
Pf3D7_07_v3	662034	663657	Pf3D7_07_v3	PF3D7_0714400	calmodulin, putative	-0.039769	-0.07823	-0.13167	-0.037081	-0.093791	-0.13295	-0.051375	-0.027782	-0.046709	-0.035666	-0.033632	-0.046709
Pf3D7_07_v3	664706	666417	Pf3D7_07_v3	PF3D7_0714500	transcription elongation factor s-II, putative	-0.020596	-0.067583	-0.022308	0.001199	-0.04854	-0.031583	0.017117	-0.025003	-0.063002	-0.060307	-0.077253	-0.063002
Pf3D7_07_v3	667735	669962	Pf3D7_07_v3	PF3D7_0714600	conserved protein, unknown function	-0.071809	-0.09402	-0.09543	-0.028233	-0.030869	-0.092821	-0.027042	-0.028095	-0.067213	-0.097392	-0.102191	-0.067213
Pf3D7_07_v3	673201	674514	Pf3D7_07_v3	PF3D7_0715000	4-nitrophenylphosphatase	-0.047472	-0.116969	-0.092964	-0.081903	-0.083876	-0.115786	0.000176	-0.075746	-0.063406	-0.151422	-0.101667	-0.063406
Pf3D7_07_v3	674515	675380	Pf3D7_07_v3	PF3D7_0715100	C-Myc-binding protein, putative	0.020066	-0.021918	-0.000881	-0.007572	-0.006634	-0.009137	-0.083408	-0.042691	-0.006193	0.007795	0.000821	-0.006193
Pf3D7_07_v3	675811	682931	Pf3D7_07_v3	PF3D7_0715200	conserved Plasmodium protein, unknown function	-0.013292	0.048178	-0.01322	0.0288	0.071569	0.073089	0.034256	0.069979	0.117152	0.006161	0.041388	0.117152
Pf3D7_07_v3	684289	686941	Pf3D7_07_v3	PF3D7_0715300	calcium/calmodulin-dependent protein kinase, putative	0.052377	0.0568	-0.015647	0.078045	0.035361	0.060136	0.121241	0.061044	0.140583	0.037912	0.036351	0.140583
Pf3D7_07_v3	687641	689098	Pf3D7_07_v3	PF3D7_0715400	secreted ookinete protein, putative	0.003634	0.058905	-0.033979	0.063736	-0.056619	-0.030974	-0.008066	0.001441	0.129358	0.262044	0.058916	0.129358
Pf3D7_07_v3	689293	690307	Pf3D7_07_v3	PF3D7_0715500	ATP synthase subunit epsilon, mitochondrial, putative	0.035383	0.000363	-0.081585	0.043978	0.015362	-0.005984	-0.003281	0.004339	0.02199	0.006291	0.012648	0.02199
Pf3D7_07_v3	690818	693582	Pf3D7_07_v3	PF3D7_0715600	GTP-binding translation elongation factor tu family protein, putative	-0.073563	-0.044154	-0.153309	-0.045141	-0.070482	-0.105022	-0.048147	-0.056212	-0.114823	-0.06519	-0.144769	-0.114823
Pf3D7_07_v3	694273	695132	Pf3D7_07_v3	PF3D7_0715700	conserved protein, unknown function	-0.115812	-0.027162	0.026102	0.027734	-0.006552	-0.083543	-0.015925	0.013785	-0.059109	-0.02427	-0.136106	-0.059109
Pf3D7_07_v3	695350	697154	Pf3D7_07_v3	PF3D7_0715800	drug/metabolite transporter DMT1, putative	0.039509	0.029823	0.000638	0.038467	0.084592	0.037838	-0.040558	0.073212	0.099144	-0.127695	-0.079603	0.099144
Pf3D7_07_v3	698989	701159	Pf3D7_07_v3	PF3D7_0715900	cation diffusion facilitator family protein, putative	0.004096	0.0158	0.000919	0.019986	-0.026867	-0.028678	-0.044405	0.028473	0.00644	0.005249	0.00935	0.00644
Pf3D7_07_v3	702957	706834	Pf3D7_07_v3	PF3D7_0716000	RNA-binding protein, putative	-0.006961	-0.101051	-0.063537	-0.048154	-0.019659	-0.157539	-0.043778	-0.107345	0.013466	-0.051865	-0.08208	0.013466
Pf3D7_07_v3	707449	711158	Pf3D7_07_v3	PF3D7_0716100	protein SDA1, putative	0.043559	-0.053794	-0.10317	-0.097263	-0.021349	-0.112697	-0.018217	-0.074509	-0.143791	-0.148173	-0.103472	-0.143791
Pf3D7_07_v3	712219	715217	Pf3D7_07_v3	PF3D7_0716200	PDCD2 domain-containing protein, putative	-0.022921	-0.022769	-0.035193	0.016822	0.012288	0.001819	0.006891	0.045996	0.016943	0.029501	0.0105	0.016943
Pf3D7_07_v3	717031	719218	Pf3D7_07_v3	PF3D7_0716300	conserved protein, unknown function	-0.059929	-0.027148	-0.044511	-0.03296	-0.049796	-0.033129	0.009696	0.032706	-0.021781	0.001662	-0.027591	-0.021781
Pf3D7_07_v3	719760	721592	Pf3D7_07_v3	PF3D7_0716400	transcription initiation factor IIA subunit 1, putative	0.009191	-0.030823	-0.078973	-0.054864	-0.048606	-0.079678	-0.119592	-0.031865	-0.045179	-0.018379	-0.07513	-0.045179
Pf3D7_07_v3	721593	724965	Pf3D7_07_v3	PF3D7_0716500	conserved Plasmodium protein, unknown function	0.024112	0.048273	0.004259	0.023531	0.038057	0.034737	0.077787	0.075578	0.016383	0.083941	0.011134	0.016383
Pf3D7_07_v3	725046	727469	Pf3D7_07_v3	PF3D7_0716600	cysteine desulfurase	-0.041058	0.009019	-0.087694	-0.022122	-0.038677	0.040716	-0.017917	0.03935	-0.023378	-0.050738	0.031671	-0.023378
Pf3D7_07_v3	727859	731376	Pf3D7_07_v3	PF3D7_0716700	conserved Plasmodium protein, unknown function	0.003435	0.104947	0.068231	0.056028	0.111034	0.208916	0.14398	0.122387	0.131294	0.311123	0.081606	0.131294
Pf3D7_07_v3	731820	733746	Pf3D7_07_v3	PF3D7_0716800	eukaryotic translation initiation factor 3 subunit I, putative	-0.00284	-0.035386	-0.039875	-0.034391	-0.046851	0.026516	-0.028343	-0.021518	-0.111492	0.008967	-0.085592	-0.111492
Pf3D7_07_v3	736120	737588	Pf3D7_07_v3	PF3D7_0716900	drug/metabolite transporter DMT2	-0.021962	0.02553	-0.016965	0.006406	0.000245	-0.049257	0.009629	0.064078	-0.074057	-0.048184	-0.076989	-0.074057
Pf3D7_07_v3	738328	741459	Pf3D7_07_v3	PF3D7_0717000	conserved Plasmodium membrane protein, unknown function	-0.02477	-0.011735	-0.03387	-0.030701	-0.006399	-0.001624	-0.017514	-0.046421	-0.026541	0.003723	-0.069086	-0.026541
Pf3D7_07_v3	741760	745046	Pf3D7_07_v3	PF3D7_0717100	conserved Plasmodium protein, unknown function	-0.010792	-0.038712	-0.02845	-0.068596	-0.039288	-0.082585	-0.01381	0.023076	-0.026219	0.065546	-0.097149	-0.026219
Pf3D7_07_v3	745047	746913	Pf3D7_07_v3	PF3D7_0717200	conserved Plasmodium protein, unknown function	-0.094299	-0.039928	-0.17026	-0.112131	-0.031016	-0.140689	-0.026374	-0.048032	-0.07295	-0.033004	-0.181002	-0.07295
Pf3D7_07_v3	748740	750949	Pf3D7_07_v3	PF3D7_0717300	transcription initiation factor IIE subunit alpha, putative	-0.012853	0.039242	-0.044061	-0.039386	0.030342	0.000895	-0.017151	-0.010564	-0.045301	0.025506	-0.002691	-0.045301
Pf3D7_07_v3	751627	754382	Pf3D7_07_v3	PF3D7_0717400	queuine tRNA-ribosyltransferase, putative	-0.082305	-0.048092	0.034613	-0.035861	-0.012599	0.017395	0.028741	-0.041713	0.017733	0.07168	-0.002798	0.017733
Pf3D7_07_v3	755513	757946	Pf3D7_07_v3	PF3D7_0717500	calcium-dependent protein kinase 4	-0.032292	0.016509	-0.027675	-0.042273	0.011847	-0.034648	-0.084081	-0.024025	-0.098734	-0.064087	-0.114133	-0.098734
Pf3D7_07_v3	758470	763127	Pf3D7_07_v3	PF3D7_0717600	conserved Plasmodium protein, unknown function	-4.3e-05	0.039503	0.069566	-0.038424	0.005615	0.081186	0.054582	-0.021571	0.019248	0.171591	0.049468	0.019248
Pf3D7_07_v3	764544	766663	Pf3D7_07_v3	PF3D7_0717700	serine--tRNA ligase, putative	-0.120508	-0.036834	-0.05954	-0.024429	-0.025158	-0.005364	-0.009583	-0.0599	-0.022749	0.082233	-0.05131	-0.022749
Pf3D7_07_v3	767107	772199	Pf3D7_07_v3	PF3D7_0717800	conserved Plasmodium protein, unknown function	-0.063948	-0.026588	-0.008275	-0.020768	0.001842	-0.011869	-0.0457	-0.015783	0.00118	0.053675	-0.027785	0.00118
Pf3D7_07_v3	772701	775514	Pf3D7_07_v3	PF3D7_0717900	thioredoxin-like protein	-0.028853	-0.016476	-0.02686	-0.016336	-0.019362	-0.037167	-0.021753	-0.009319	-0.06959	-0.029747	-0.064225	-0.06959
Pf3D7_07_v3	775891	795887	Pf3D7_07_v3	PF3D7_0718000	dynein heavy chain, putative	0.014579	0.0423	-0.004717	0.002762	0.033498	0.03093	-0.016093	0.00996	0.032416	0.06287	0.021024	0.032416
Pf3D7_07_v3	796264	804989	Pf3D7_07_v3	PF3D7_0718100	exported serine/threonine protein kinase	-0.072338	-0.059911	-0.027582	-0.005458	-0.063707	-0.009652	0.00644	-0.014699	-0.009716	0.037379	-0.007627	-0.009716
Pf3D7_07_v3	812051	820885	Pf3D7_07_v3	PF3D7_0718300	cysteine repeat modular protein 2	-0.065649	-0.010544	-0.035489	0.00773	-0.011896	0.007885	-0.0274	0.009563	0.041854	0.005136	0.002374	0.041854
Pf3D7_07_v3	822188	823265	Pf3D7_07_v3	PF3D7_0718400	mitochondrial ribosomal protein S8 precursor, putative	-0.050164	-0.040074	-0.029987	-0.011127	-0.031085	-0.004083	-0.009486	-0.009371	-0.032032	0.020521	-0.034152	-0.032032
Pf3D7_07_v3	824195	826134	Pf3D7_07_v3	PF3D7_0718500	prefoldin subunit 3, putative	-0.073844	0.002229	-0.017826	-0.006334	-0.001609	0.005164	0.012815	-0.033358	-0.039896	0.112591	-0.045552	-0.039896
Pf3D7_07_v3	826587	831427	Pf3D7_07_v3	PF3D7_0718600	conserved Plasmodium protein, unknown function	-0.086294	-0.024967	-0.08484	-0.026993	-0.049687	0.016938	-0.017491	-0.081067	-0.060008	-0.031036	-0.067725	-0.060008
Pf3D7_07_v3	831428	833172	Pf3D7_07_v3	PF3D7_0718700	conserved Plasmodium membrane protein, unknown function	0.062746	0.118825	0.048967	0.075563	0.010444	0.101873	0.059099	0.095596	0.038455	0.103495	0.074962	0.038455
Pf3D7_07_v3	833380	835301	Pf3D7_07_v3	PF3D7_0718800	conserved protein, unknown function	-0.02393	0.07418	-0.006909	0.025748	-0.045053	0.070329	-0.023228	-0.022183	0.012111	0.138758	0.055917	0.012111
Pf3D7_07_v3	835707	837111	Pf3D7_07_v3	PF3D7_0718900	conserved Plasmodium protein, unknown function	-0.017719	0.012507	0.028105	0.009054	0.00603	0.073883	0.045788	0.011741	0.013054	0.098748	0.010951	0.013054
Pf3D7_07_v3	837885	838793	Pf3D7_07_v3	PF3D7_0719000	conserved protein, unknown function	-0.076169	0.039688	0.007221	0.053478	0.003919	0.10725	0.129854	0.061585	0.021861	0.087704	-0.046596	0.021861
Pf3D7_07_v3	838794	840274	Pf3D7_07_v3	PF3D7_0719100	ATP synthase F0 subunit a-like protein, putative	0.034046	0.013765	-0.055568	0.024134	-0.076537	0.035189	-0.021858	0.006552	-0.115948	0.054704	-0.066496	-0.115948
Pf3D7_07_v3	840858	843080	Pf3D7_07_v3	PF3D7_0719200	NIMA related kinase 4	-0.103555	-0.08575	-0.113518	-0.057868	-0.078526	-0.041565	0.015219	0.050166	-0.104966	0.07386	-0.027679	-0.104966
Pf3D7_07_v3	844245	847843	Pf3D7_07_v3	PF3D7_0719300	actin-related protein, putative	-0.057212	0.077839	-0.042508	-0.003752	-0.055007	-0.016023	0.024636	-0.040368	-0.08961	-0.14238	-0.003918	-0.08961
Pf3D7_07_v3	848148	853843	Pf3D7_07_v3	PF3D7_0719400	conserved Plasmodium protein, unknown function	-0.04765	0.026168	-0.019945	0.028948	-0.024181	0.044721	-0.00977	-0.001266	-0.015511	0.131687	-0.008113	-0.015511
Pf3D7_07_v3	854402	856904	Pf3D7_07_v3	PF3D7_0719500	LEM3/CDC50 family protein, putative	-0.012773	-0.016794	-0.010146	0.007747	0.011055	0.051663	0.040511	0.021006	0.031719	0.039399	-0.023732	0.031719
Pf3D7_07_v3	858492	859742	Pf3D7_07_v3	PF3D7_0719600	60S ribosomal protein L11a, putative	-0.049478	-0.042768	0.016771	0.024118	-0.02613	0.028131	0.010006	-0.020157	0.041377	0.017386	0.031843	0.041377
Pf3D7_07_v3	861333	862737	Pf3D7_07_v3	PF3D7_0719700	40S ribosomal protein S10, putative	-0.037646	0.003537	-0.021289	-0.011664	-0.045646	-0.02178	0.013759	-0.005911	-0.002212	0.13741	0.040894	-0.002212
Pf3D7_07_v3	863202	865063	Pf3D7_07_v3	PF3D7_0719800	conserved protein, unknown function	-0.016764	-0.002564	-0.077372	0.061882	-0.124087	-0.089309	-0.138586	-0.060152	-0.060166	0.003959	-0.066003	-0.060166
Pf3D7_07_v3	865677	876382	Pf3D7_07_v3	PF3D7_0719900	conserved Plasmodium membrane protein, unknown function	0.110411	0.062663	0.220364	0.200592	0.134022	0.125727	0.055204	0.087153	0.137199	0.169396	0.19652	0.137199
Pf3D7_07_v3	876545	877682	Pf3D7_07_v3	PF3D7_0720000	exosome complex component CSL4, putative	-0.021235	0.055624	0.064342	0.069364	0.017362	0.1104	0.114639	0.038148	0.087712	0.249143	0.149138	0.087712
Pf3D7_07_v3	877683	878882	Pf3D7_07_v3	PF3D7_0720100	pre-rRNA-processing protein ESF2, putative	-0.015064	-0.01193	0.007623	0.011123	-0.000559	0.038556	-0.000131	0.003362	0.048823	0.068346	0.04824	0.048823
Pf3D7_07_v3	879204	880196	Pf3D7_07_v3	PF3D7_0720200	conserved protein, unknown function	0.05603	0.044392	-0.026902	0.045979	0.039119	0.024728	0.055529	-0.021494	0.024327	0.123891	0.028508	0.024327
Pf3D7_07_v3	880215	881113	Pf3D7_07_v3	PF3D7_0720300	conserved Plasmodium protein, unknown function	0.035629	-0.00735	-0.017935	0.046356	0.007601	-0.094693	0.009165	0.027048	-0.055079	-0.025556	-0.024925	-0.055079
Pf3D7_07_v3	882686	885238	Pf3D7_07_v3	PF3D7_0720400	apoptosis-inducing factor, putative	-0.066303	-0.056969	-0.005647	0.215958	0.033599	-0.010203	0.064923	-0.050456	-0.07873	0.115779	0.131036	-0.07873
Pf3D7_07_v3	886096	887651	Pf3D7_07_v3	PF3D7_0720500	conserved Plasmodium protein, unknown function	-0.024405	-0.012529	-0.076032	0.015813	-0.018833	-0.007154	0.017682	-0.068447	-0.040656	0.010145	-0.009541	-0.040656
Pf3D7_07_v3	887652	889628	Pf3D7_07_v3	PF3D7_0720600	conserved protein, unknown function	0.098144	0.14538	0.19081	0.160877	0.126308	0.142077	0.258226	0.181497	0.209163	0.207306	0.149681	0.209163
Pf3D7_07_v3	891433	899301	Pf3D7_07_v3	PF3D7_0720700	phosphoinositide-binding protein, putative	0.060463	0.102076	0.125197	0.09868	0.061488	0.054873	0.080411	0.076472	0.031691	0.171728	0.051811	0.031691
Pf3D7_07_v3	899501	901343	Pf3D7_07_v3	PF3D7_0720800	Ham1-like protein, putative	0.011954	0.031868	-0.001488	0.023734	0.013819	0.027123	0.005851	0.008507	-0.004779	-0.04313	0.021314	-0.004779
Pf3D7_07_v3	901344	903037	Pf3D7_07_v3	PF3D7_0720900	tetratricopeptide repeat protein, putative	0.139279	0.130675	0.169762	0.186281	0.081465	0.223533	0.142725	0.101656	0.135043	0.262816	0.089081	0.135043
Pf3D7_07_v3	903893	914921	Pf3D7_07_v3	PF3D7_0721000	conserved Plasmodium membrane protein, unknown function	0.054067	0.050848	0.090854	0.074618	0.031772	0.028906	0.043275	0.053021	0.016344	0.017268	0.051385	0.016344
Pf3D7_07_v3	916184	917418	Pf3D7_07_v3	PF3D7_0721100	conserved protein, unknown function	0.020496	0.002139	0.018831	0.004103	0.00555	0.0241	0.000854	0.00567	0.009373	0.017919	0.019759	0.009373
Pf3D7_07_v3	917708	921066	Pf3D7_07_v3	PF3D7_0721200	conserved Plasmodium protein, unknown function	-0.011813	-0.094307	0.05222	-0.000756	-0.015692	-0.019018	0.073121	-0.049784	-0.092181	-0.10535	-0.009579	-0.092181
Pf3D7_07_v3	922035	925234	Pf3D7_07_v3	PF3D7_0721300	ATP-dependent RNA helicase DBP7, putative	0.013679	0.040922	-0.064373	0.044048	-0.045886	0.058517	0.000291	-0.020613	-0.016846	-0.051005	-0.037426	-0.016846
Pf3D7_07_v3	926442	928271	Pf3D7_07_v3	PF3D7_0721400	rhoptry protein, putative	0.025859	0.040885	-0.033004	-0.007988	0.022322	0.008898	0.029367	-0.012707	-0.067472	0.00914	-0.042035	-0.067472
Pf3D7_07_v3	928272	931103	Pf3D7_07_v3	PF3D7_0721500	conserved Plasmodium membrane protein, unknown function	0.043389	0.014729	-0.007794	0.018396	-0.013029	0.079897	0.020122	-0.020109	-0.018863	0.000712	-0.058802	-0.018863
Pf3D7_07_v3	931209	932414	Pf3D7_07_v3	PF3D7_0721600	40S ribosomal protein S5, putative	0.059476	-0.019536	-0.049853	0.022907	-0.024344	-0.001906	0.034001	-0.010115	0.058443	-0.141801	0.011446	0.058443
Pf3D7_07_v3	935247	937150	Pf3D7_07_v3	PF3D7_0721700	secreted ookinete protein, putative	0.072845	0.06691	0.110869	0.031703	-0.00824	0.058608	0.121627	0.105505	0.010027	-0.103397	0.060686	0.010027
Pf3D7_07_v3	938029	939145	Pf3D7_07_v3	PF3D7_0721800	conserved Plasmodium protein, unknown function	-0.052326	-0.033241	-0.091992	-0.036569	-0.013181	-0.084035	-0.009802	-0.034767	-0.070399	-0.027229	-0.076227	-0.070399
Pf3D7_07_v3	939465	940500	Pf3D7_07_v3	PF3D7_0721900	V-type ATPase V0 subunit e, putative	-0.005234	0.0324	0.051384	0.086691	-0.045674	-0.009708	-0.051385	-0.024348	0.038852	0.166357	0.050648	0.038852
Pf3D7_07_v3	941526	942763	Pf3D7_07_v3	PF3D7_0722000	conserved Plasmodium protein, unknown function	0.037809	0.019973	0.006267	0.007947	0.073192	0.059033	0.069075	0.148208	0.030258	0.002418	0.084114	0.030258
Pf3D7_07_v3	943773	945484	Pf3D7_07_v3	PF3D7_0722100	protein pelota homolog, putative	-0.023227	0.033499	0.067506	0.077473	-0.050755	0.100052	0.070027	0.038512	0.075407	-0.127266	0.051883	0.075407
Pf3D7_07_v3	946113	948862	Pf3D7_07_v3	PF3D7_0722200	rhoptry-associated leucine zipper-like protein 1	-0.072191	-0.056976	-0.091671	-0.057174	-0.072952	-0.102399	0.02205	-0.037202	-0.157266	-0.118809	-0.104113	-0.157266
Pf3D7_07_v3	949199	953364	Pf3D7_07_v3	PF3D7_0722300	ubiquitin carboxyl-terminal hydrolase, putative	0.030639	0.098618	0.033419	0.055328	0.042053	0.02635	0.04211	0.108056	0.043447	0.068676	0.097421	0.043447
Pf3D7_07_v3	954534	956593	Pf3D7_07_v3	PF3D7_0722400	Obg-like ATPase 1, putative	0.020388	-0.004684	0.025685	0.000602	0.035955	-0.02383	0.044405	0.012909	0.05533	-0.001008	0.006763	0.05533
Pf3D7_07_v3	956670	958267	Pf3D7_07_v3	PF3D7_0722500	pre-mRNA-splicing factor CWC15, putative	-0.054079	-0.029981	-0.027296	-0.052153	-0.098534	-0.061959	-0.008834	-0.045011	0.013758	-0.057537	-0.016383	0.013758
Pf3D7_07_v3	958636	960944	Pf3D7_07_v3	PF3D7_0722600	U3 small nucleolar RNA-associated protein 7, putative	-0.025285	0.044351	0.079817	0.042766	-0.026663	-0.000638	0.033881	0.017597	0.061864	0.075327	0.031025	0.061864
Pf3D7_07_v3	961781	962697	Pf3D7_07_v3	PF3D7_0722700	conserved protein, unknown function	-0.019396	-0.023244	-0.093045	-0.04375	-0.012336	-0.034473	0.090263	0.018532	-0.08142	0.005291	-0.058941	-0.08142
Pf3D7_07_v3	963120	965359	Pf3D7_07_v3	PF3D7_0722800	conserved protein, unknown function	0.051202	0.014465	0.041145	-0.003956	0.004343	0.074649	0.055735	-0.053097	0.108512	-0.045598	0.051169	0.108512
Pf3D7_07_v3	965414	968032	Pf3D7_07_v3	PF3D7_0722900	conserved protein, unknown function	-0.038637	-0.06948	-0.029589	-0.007928	-0.052494	-0.033042	0.024686	0.009811	-0.034462	-0.046249	-0.001086	-0.034462
Pf3D7_07_v3	968586	969985	Pf3D7_07_v3	PF3D7_0723000	tRNAHis guanylyltransferase, putative	0.039962	0.002031	0.008149	0.024734	-0.074011	0.077916	0.007814	-0.021991	0.058096	0.107206	-0.024611	0.058096
Pf3D7_07_v3	970242	972127	Pf3D7_07_v3	PF3D7_0723100	protein CPH1, putative	-0.083237	0.036801	-0.004575	-0.074987	-0.048585	0.0023	0.061313	0.01716	0.034183	-0.054335	-0.043408	0.034183
Pf3D7_07_v3	972408	974522	Pf3D7_07_v3	PF3D7_0723200	conserved Plasmodium protein, unknown function	-0.054564	-0.029726	-0.06641	-0.067853	-0.005806	-0.04905	0.001707	-0.065757	-0.015032	-0.006623	-0.001817	-0.015032
Pf3D7_07_v3	975516	978658	Pf3D7_07_v3	PF3D7_0723300	conserved protein, unknown function	-0.045884	0.002773	-0.040716	-0.083586	-0.055896	0.060207	-0.00398	-0.020804	-0.055147	-0.023569	0.041309	-0.055147
Pf3D7_07_v3	978670	983438	Pf3D7_07_v3	PF3D7_0723400	conserved Plasmodium protein, unknown function	0.178436	0.117576	0.192063	0.211929	0.126911	0.151399	0.167096	0.160775	0.256626	0.005679	0.243982	0.256626
Pf3D7_07_v3	984528	985708	Pf3D7_07_v3	PF3D7_0723500	dynactin subunit 5, putative	-0.030184	0.040124	-0.042619	0.028226	0.016372	0.003538	0.04007	0.058859	-0.014571	0.076457	0.009836	-0.014571
Pf3D7_07_v3	986348	987615	Pf3D7_07_v3	PF3D7_0723600	proteasome assembly chaperone 4, putative	-0.015836	-0.023059	-0.041025	0.040035	-0.064082	0.052843	0.049532	-0.031283	-0.069724	-0.106682	-0.03796	-0.069724
Pf3D7_07_v3	987895	991493	Pf3D7_07_v3	PF3D7_0723700	metallo-hydrolase/oxidoreductase, putative	-0.099045	0.061695	0.123268	-0.048056	-0.0531	-0.004451	0.095764	0.055791	0.040686	0.361086	-0.069252	0.040686
Pf3D7_07_v3	992982	1000467	Pf3D7_07_v3	PF3D7_0723800	conserved Plasmodium protein, unknown function	0.052399	0.03082	0.10552	0.099939	0.063103	0.063573	0.115038	0.085224	0.111953	0.031849	0.15894	0.111953
Pf3D7_07_v3	1000468	1004996	Pf3D7_07_v3	PF3D7_0723900	RNA-binding protein, putative	0.033097	0.057512	0.013131	0.025311	0.021967	0.018782	0.009751	0.024935	-0.008427	0.113139	0.021604	-0.008427
Pf3D7_07_v3	1006085	1012395	Pf3D7_07_v3	PF3D7_0724000	Rab GTPase activator and protein kinase, putative	0.006568	0.026694	0.046385	0.050119	0.028178	0.051527	0.053034	0.041896	0.076578	0.140913	0.069514	0.076578
Pf3D7_07_v3	1013045	1016699	Pf3D7_07_v3	PF3D7_0724100	conserved Plasmodium protein, unknown function	0.02122	0.015203	0.04553	0.069909	-0.006556	0.029713	0.035891	-0.010412	0.049346	0.067556	0.072312	0.049346
Pf3D7_07_v3	1019134	1020917	Pf3D7_07_v3	PF3D7_0724200	type 2A phosphatase-associated protein 42, putative	-0.027815	0.025123	-0.00342	0.02282	-0.030303	0.031362	-0.028394	-0.010373	-0.023986	-0.000698	0.030879	-0.023986
Pf3D7_07_v3	1021258	1022880	Pf3D7_07_v3	PF3D7_0724300	ubiquinone biosynthesis O-methyltransferase, putative	-0.008424	0.005841	0.021471	0.003183	0.00634	0.028096	-0.022391	-0.004501	0.013639	0.145471	0.037059	0.013639
Pf3D7_07_v3	1023401	1024371	Pf3D7_07_v3	PF3D7_0724400	mitochondrial import inner membrane translocase subunit TIM14, putative	-0.105848	-0.107768	-0.054366	-0.040746	-0.070268	-0.03732	-0.133727	-0.101663	0.014858	-0.096376	0.036813	0.014858
Pf3D7_07_v3	1024422	1026305	Pf3D7_07_v3	PF3D7_0724500	conserved Plasmodium protein, unknown function	0.047599	0.031636	0.076805	0.09568	0.067763	0.121772	0.085821	-0.036624	0.093389	0.115059	0.132998	0.093389
Pf3D7_07_v3	1026306	1033327	Pf3D7_07_v3	PF3D7_0724600	protein kinase, putative	-0.066052	0.001688	-0.018616	-0.019148	-0.003408	0.013044	0.014365	-0.001798	0.021603	0.122755	-0.01603	0.021603
Pf3D7_07_v3	1034719	1046359	Pf3D7_07_v3	PF3D7_0724700	conserved Plasmodium protein, unknown function	0.05923	0.059346	0.061099	0.065902	0.061233	0.088283	0.080468	0.086228	0.071114	0.046212	0.051213	0.071114
Pf3D7_07_v3	1047177	1049612	Pf3D7_07_v3	PF3D7_0724800	kelch domain-containing protein, putative	0.020093	-0.022566	0.04539	0.032073	0.001224	0.027425	0.045467	0.017872	0.037334	0.042631	0.058247	0.037334
Pf3D7_07_v3	1052215	1058408	Pf3D7_07_v3	PF3D7_0724900	kinesin-19, putative	-0.02783	-0.091255	-0.002091	-0.074006	-0.055355	0.022228	-0.022576	-0.052623	-0.016778	-0.025817	-0.054469	-0.016778
Pf3D7_07_v3	1058683	1063226	Pf3D7_07_v3	PF3D7_0725000	exonuclease I, putative	-0.050172	-0.033191	-0.0232	-0.044483	-0.080572	-0.008998	-0.030961	-0.040544	-0.019082	0.010289	-0.015123	-0.019082
Pf3D7_07_v3	1065002	1070490	Pf3D7_07_v3	PF3D7_0725100	conserved Plasmodium membrane protein, unknown function	-0.034485	-0.080647	-0.052239	-0.039938	-0.128011	-0.058062	-0.018791	-0.023925	-0.059843	-0.032916	-0.066439	-0.059843
Pf3D7_07_v3	1070730	1071969	Pf3D7_07_v3	PF3D7_0725200	mago nashi protein homologue, putative	-0.065114	-0.058583	-0.02323	-0.039556	-0.022462	-0.01066	0.048682	-0.035788	-0.009959	0.015588	-0.035855	-0.009959
Pf3D7_07_v3	1071970	1075004	Pf3D7_07_v3	PF3D7_0725300	conserved protein, unknown function	-0.027442	-0.028164	0.031664	0.03637	-0.009143	0.138151	0.009186	0.057624	-0.057398	0.006353	-0.133955	-0.057398
Pf3D7_07_v3	1078765	1080305	Pf3D7_07_v3	PF3D7_0725400	conserved Plasmodium protein, unknown function	0.116556	0.07584	0.089505	0.016963	0.031712	0.075833	0.061895	0.091396	0.037745	0.046525	0.064451	0.037745
Pf3D7_07_v3	1080392	1082593	NA	FALSE	NA	0.02983	0.106243	0.018368	0.03447	0.036623	-0.041287	0.041491	0.07384	-0.053606	-0.157102	-0.012436	-0.053606
Pf3D7_07_v3	1083511	1085847	Pf3D7_07_v3	PF3D7_0725600	18S ribosomal RNA	-0.067648	0.100046	0.340111	0.11805	0.143016	0.230051	0.216885	0.134098	0.223259	0.152054	0.288336	0.223259
Pf3D7_07_v3	1086570	1090607	Pf3D7_07_v3	PF3D7_0726000	28S ribosomal RNA	0.022317	0.060555	0.311412	0.078793	0.107132	0.153162	0.07356	0.105482	0.04192	0.010363	0.117992	0.04192
Pf3D7_07_v3	1093316	1096372	Pf3D7_07_v3	PF3D7_0726100	Plasmodium exported protein, unknown function	-0.080035	-0.047955	-0.043756	-0.044556	-0.04881	-0.052666	0.050167	0.016177	0.074858	0.091338	0.012593	0.074858
Pf3D7_07_v3	1099884	1103217	Pf3D7_07_v3	PF3D7_0726200	serine/threonine protein kinase, FIKK family	0.063164	0.015303	0.034817	0.04982	0.026266	0.036301	-0.014369	0.031187	0.035147	0.114526	0.063096	0.035147
Pf3D7_07_v3	1103906	1108597	Pf3D7_07_v3	PF3D7_0726300	DNA mismatch repair protein PMS1, putative	-0.072226	-0.034886	0.02181	-0.004181	-0.002278	-0.036553	0.006149	0.00751	0.065004	0.100779	0.033323	0.065004
Pf3D7_07_v3	1108598	1124742	Pf3D7_07_v3	PF3D7_0726400	conserved Plasmodium membrane protein, unknown function	0.037014	0.009106	0.024622	0.061224	0.013643	0.00387	0.015467	0.040728	0.022323	-0.02992	0.030089	0.022323
Pf3D7_07_v3	1126306	1136827	Pf3D7_07_v3	PF3D7_0726500	ubiquitin carboxyl-terminal hydrolase, putative	-0.024869	-0.035162	-0.003248	0.019601	-0.01011	0.026005	0.018237	-0.010233	0.02696	0.097681	0.034065	0.02696
Pf3D7_07_v3	1140229	1143004	Pf3D7_07_v3	PF3D7_0726600	conserved Plasmodium protein, unknown function	-0.030267	0.000855	-0.034437	-0.027685	-0.002466	-0.036645	-0.046167	-0.037469	-0.026771	0.039578	-0.03518	-0.026771
Pf3D7_07_v3	1145398	1147388	Pf3D7_07_v3	PF3D7_0726900	mitochondrial import inner membrane translocase subunit TIM50, putative	-0.078283	-0.011154	-0.035659	-0.028371	-0.049989	-0.041369	0.013691	-0.041338	0.011642	0.037358	-0.027116	0.011642
Pf3D7_07_v3	1147389	1151308	Pf3D7_07_v3	PF3D7_0727000	vacuolar protein sorting-associated protein 53, putative	0.042237	0.027661	0.038803	0.02283	-0.001182	0.041409	-0.019069	0.035597	0.043236	0.103103	0.086563	0.043236
Pf3D7_07_v3	1151905	1155605	Pf3D7_07_v3	PF3D7_0727100	conserved protein, unknown function	0.03181	0.020979	0.088102	-0.008457	0.017777	-0.02008	0.070712	0.026367	0.052566	0.084524	0.074865	0.052566
Pf3D7_07_v3	1156498	1158659	Pf3D7_07_v3	PF3D7_0727200	cysteine desulfurase, putative	-0.063402	-0.06343	0.039606	-0.013809	-0.058834	-0.057407	0.038177	0.001172	0.003256	0.117206	0.046062	0.003256
Pf3D7_07_v3	1159450	1162070	Pf3D7_07_v3	PF3D7_0727300	DNA (cytosine-5)-methyltransferase	-0.052489	-0.042213	-0.057762	-0.049989	-0.121898	-0.067563	-0.024564	0.014863	-0.027897	0.038759	-0.055271	-0.027897
Pf3D7_07_v3	1162460	1164081	Pf3D7_07_v3	PF3D7_0727400	proteasome subunit alpha type-5, putative	-0.03422	-0.130904	-0.03893	-0.039522	-0.05767	-0.05995	-0.07943	0.013292	0.102734	0.073275	0.07354	0.102734
Pf3D7_07_v3	1164205	1166828	Pf3D7_07_v3	PF3D7_0727500	mTERF domain-containing protein, putative	-0.019246	-0.053736	-0.022373	-0.018076	-0.064517	-0.041879	-0.04183	-0.08183	-0.057607	-0.083716	-0.050644	-0.057607
Pf3D7_07_v3	1167191	1171051	Pf3D7_07_v3	PF3D7_0727600	conserved Plasmodium protein, unknown function	-0.033321	-0.097163	-0.02982	-0.002055	-0.060789	-0.05468	-0.059687	-0.027368	-0.053233	-0.092355	0.047739	-0.053233
Pf3D7_07_v3	1171052	1174406	Pf3D7_07_v3	PF3D7_0727700	conserved Plasmodium protein, unknown function	-0.047284	-0.161005	-0.053448	0.002651	-0.123207	-0.007497	0.003597	-0.054452	-0.012612	-0.003224	0.003179	-0.012612
Pf3D7_07_v3	1175694	1181950	Pf3D7_07_v3	PF3D7_0727800	cation transporting ATPase, putative	-0.017898	-0.060315	-0.002352	-0.051747	0.000291	-0.046812	-0.007847	-0.010542	-0.009489	0.004336	-0.007555	-0.009489
Pf3D7_07_v3	1184151	1190422	Pf3D7_07_v3	PF3D7_0727900	conserved Plasmodium protein, unknown function	0.026692	0.01975	0.055774	0.037836	0.044574	-0.015937	0.03527	0.044115	-0.004782	0.029086	0.045394	-0.004782
Pf3D7_07_v3	1190929	1192539	Pf3D7_07_v3	PF3D7_0728000	eukaryotic translation initiation factor 2 subunit alpha	-5.3e-05	-0.067591	0.016585	-0.016564	-0.084055	-0.084613	-0.051423	-0.017874	-0.018797	-0.028687	0.020416	-0.018797
Pf3D7_07_v3	1193366	1210551	Pf3D7_07_v3	PF3D7_0728100	conserved Plasmodium membrane protein, unknown function	-0.017642	-0.051666	-0.0058	-0.030913	-0.03711	-0.032767	0.015502	-0.019153	0.03763	0.06994	0.030204	0.03763
Pf3D7_07_v3	1211407	1213679	Pf3D7_07_v3	PF3D7_0728200	actin-like protein, putative	-0.116112	-0.099245	0.033258	-0.105745	-0.102488	-0.069714	-0.029755	-0.0935	-0.070806	-0.04561	-0.058763	-0.070806
Pf3D7_07_v3	1213680	1214726	Pf3D7_07_v3	PF3D7_0728300	conserved protein, unknown function	-0.1365	0.008742	0.160381	0.037392	0.035291	0.055283	0.148268	0.12237	0.012898	0.113632	0.147854	0.012898
Pf3D7_07_v3	1215926	1217451	Pf3D7_07_v3	PF3D7_0728500	conserved Plasmodium protein, unknown function	0.09632	0.110509	0.251698	0.085084	0.10844	0.144188	0.175955	0.158766	0.183479	0.172345	0.181899	0.183479
Pf3D7_07_v3	1218176	1225723	Pf3D7_07_v3	PF3D7_0728600	RING zinc finger protein, putative	-0.012036	-0.063213	0.02886	-0.059254	-0.031415	-0.024225	0.031968	-0.011504	0.032745	0.004241	0.030688	0.032745
Pf3D7_07_v3	1225779	1228964	Pf3D7_07_v3	PF3D7_0728700	alpha/beta hydrolase, putative	-0.022945	-0.009438	0.051017	-0.117797	-0.061532	-0.013728	0.071282	-0.000518	0.01704	-0.035126	0.01744	0.01704
Pf3D7_07_v3	1230339	1232226	Pf3D7_07_v3	PF3D7_0728800	conserved Plasmodium protein, unknown function	-0.098919	-0.043368	-0.002447	-0.064202	-0.010044	-0.027046	0.044328	0.040789	0.021743	0.02781	0.034909	0.021743
Pf3D7_07_v3	1232227	1234922	Pf3D7_07_v3	PF3D7_0728900	RNA-binding protein, putative	-0.004737	-0.050006	0.074731	0.023382	-0.011576	-0.061594	0.002519	0.007418	0.018213	0.056622	0.003679	0.018213
Pf3D7_07_v3	1235449	1236957	Pf3D7_07_v3	PF3D7_0729000	signal recognition particle subunit SRP9	-0.003454	0.082713	0.122964	0.050041	0.046828	-0.008699	0.123393	0.111856	0.138486	-0.090568	0.096658	0.138486
Pf3D7_07_v3	1238196	1246438	Pf3D7_07_v3	PF3D7_0729100	conserved Plasmodium protein, unknown function	-0.001208	-0.001888	0.034904	-0.036826	-0.013117	-0.008771	0.026922	0.047428	0.038434	-0.033137	0.04182	0.038434
Pf3D7_07_v3	1247148	1248514	Pf3D7_07_v3	PF3D7_0729200	1-cys peroxiredoxin	0.09124	0.009643	0.104777	0.044009	0.061995	0.143747	0.151586	0.083659	0.035999	0.157423	0.130121	0.035999
Pf3D7_07_v3	1248587	1251753	Pf3D7_07_v3	PF3D7_0729300	60S ribosomal export protein NMD3, putative	-0.038918	-0.000165	0.085184	0.029437	-0.044587	0.00011	0.024791	0.004705	-0.019401	-0.034149	0.035406	-0.019401
Pf3D7_07_v3	1252597	1254347	Pf3D7_07_v3	PF3D7_0729400	ribosome biogenesis protein BRX1, putative	-0.013949	0.093509	0.093482	0.034505	0.058376	0.061569	0.111681	0.132323	0.069869	-0.082476	0.066461	0.069869
Pf3D7_07_v3	1255121	1257903	Pf3D7_07_v3	PF3D7_0729500	mRNA (N6-adenosine)-methyltransferase, putative	-0.014474	-0.046394	-0.043569	0.000603	-0.083221	-0.06503	-0.023251	0.020094	0.027892	-0.016567	-0.000784	0.027892
Pf3D7_07_v3	1258537	1259942	Pf3D7_07_v3	PF3D7_0729600	conserved Plasmodium protein, unknown function	-0.042393	-0.038405	0.044903	0.022847	-0.00399	-0.003338	-0.008788	0.043776	0.067557	0.203603	0.087179	0.067557
Pf3D7_07_v3	1259943	1263030	Pf3D7_07_v3	PF3D7_0729700	conserved protein, unknown function	-0.065333	-0.053356	0.039126	-0.056469	-0.024909	-0.045261	-0.059704	-0.109024	-0.15824	-0.086303	-0.000929	-0.15824
Pf3D7_07_v3	1265660	1281566	Pf3D7_07_v3	PF3D7_0729900	dynein heavy chain, putative	-0.019766	-0.000649	0.025679	0.003376	-0.02716	-0.003512	-0.019599	-0.04579	0.085147	0.090379	0.080619	0.085147
Pf3D7_07_v3	1282663	1285769	Pf3D7_07_v3	PF3D7_0730100	tRNA pseudouridine synthase D, putative	-0.004795	-0.054791	0.041659	0.012139	-0.049278	0.004908	-0.006774	-0.020398	0.000103	-0.124193	-0.013715	0.000103
Pf3D7_07_v3	1285807	1289649	Pf3D7_07_v3	PF3D7_0730200	AP-4 complex subunit beta, putative	-0.011895	0.017177	0.022035	-0.021442	-0.053149	0.000393	-0.029059	0.02762	-0.027535	-0.074794	0.02654	-0.027535
Pf3D7_07_v3	1297209	1301704	Pf3D7_07_v3	PF3D7_0730300	AP2 domain transcription factor AP2-L, putative	0.025691	0.033027	0.011778	-0.003727	-0.003189	-0.028439	-0.00088	0.018032	-0.014222	-0.057692	0.056516	-0.014222
Pf3D7_07_v3	1304097	1305346	Pf3D7_07_v3	PF3D7_0730400	IMP1-like protein, putative	0.056879	0.022374	0.108116	0.004831	0.046382	0.055186	0.03947	0.003189	0.239933	0.240941	0.183509	0.239933
Pf3D7_07_v3	1305644	1314465	Pf3D7_07_v3	PF3D7_0730500	conserved Plasmodium protein, unknown function	-0.030286	-0.028383	0.039636	-0.039897	-0.010464	-0.031301	0.023285	0.028623	0.040786	-0.060266	0.005166	0.040786
Pf3D7_07_v3	1321056	1322617	Pf3D7_07_v3	PF3D7_0730800	Plasmodium exported protein, unknown function, unspecified product	-0.076459	-0.113973	-0.040582	-0.102917	-0.116422	-0.101204	-0.001233	-0.021553	0.028877	-0.006458	-0.032624	0.028877
Pf3D7_07_v3	1325125	1332063	Pf3D7_07_v3	PF3D7_0730900	EMP1-trafficking protein	-0.026733	0.006816	-0.05106	-0.0279	-0.017722	-0.04314	0.002129	-0.012626	-0.020646	0.021162	0.009078	-0.020646
Pf3D7_07_v3	1332925	1335188	Pf3D7_07_v3	PF3D7_0731000	unspecified product	-0.064264	-0.039938	0.025231	-0.049238	0.099961	-0.073845	-0.023224	0.042549	0.075955	0.00164	0.012514	0.075955
Pf3D7_07_v3	1338709	1342040	Pf3D7_07_v3	PF3D7_0731100	EMP1-trafficking protein	-0.001015	0.021299	0.02324	0.00561	0.026285	0.037672	-0.029512	0.029966	0.07693	0.101381	0.06159	0.07693
Pf3D7_07_v3	1342592	1344246	Pf3D7_07_v3	PF3D7_0731200	Plasmodium exported protein, unknown function	0.005192	0.011348	-0.009458	-0.049637	0.072014	-0.049473	-0.086027	0.01578	0.001904	-0.054637	0.001589	0.001904
Pf3D7_07_v3	1349782	1351399	Pf3D7_07_v3	PF3D7_0731300	Plasmodium exported protein (PHISTb), unknown function	0.060085	0.022202	-0.02559	-0.060602	0.018671	-0.085238	-0.006272	-0.002596	-0.03591	-0.040365	-0.106611	-0.03591
Pf3D7_07_v3	1353508	1355732	Pf3D7_07_v3	PF3D7_0731400	serine/threonine protein kinase, FIKK family, pseudogene	0.018961	0.005579	-0.05088	-0.024545	0.010644	-0.040977	-0.082427	-0.0527	-0.05047	-0.032772	-0.020312	-0.05047
Pf3D7_07_v3	1357805	1363179	Pf3D7_07_v3	PF3D7_0731500	erythrocyte binding antigen-175	0.027903	0.043582	0.076649	0.005293	0.041658	0.024734	0.004524	-0.026535	0.034777	0.02965	0.014423	0.034777
Pf3D7_07_v3	1367911	1370846	Pf3D7_07_v3	PF3D7_0731600	acyl-CoA synthetase	-0.05582	-0.092784	-0.006689	-0.056757	0.015181	-0.065755	-0.033412	-0.15282	-0.070727	-0.035819	-0.116703	-0.070727
Pf3D7_07_v3	1371813	1373010	Pf3D7_07_v3	PF3D7_0731700	Plasmodium exported protein (hyp9), unknown function	0.051906	0.067669	0.002762	-0.015412	-0.017988	-0.130375	-0.009422	-0.065829	-0.026335	-0.081031	-0.150566	-0.026335
Pf3D7_07_v3	1378368	1381019	Pf3D7_07_v3	PF3D7_0731800	alpha/beta hydrolase, putative	-0.004101	-0.086861	-0.02548	-0.108767	-0.003001	-0.059906	-0.000863	-0.095983	-0.071726	-0.081258	-0.121638	-0.071726
Pf3D7_07_v3	1382160	1383774	Pf3D7_07_v3	PF3D7_0731900	rifin, pseudogene	0.023034	-0.103957	0.049124	-0.038126	0.011968	-0.088484	-0.03658	-0.066556	0.093066	-0.047563	0.077124	0.093066
Pf3D7_07_v3	1385385	1386876	Pf3D7_07_v3	PF3D7_0732000	stevor	-0.083478	-0.050517	0.18949	-0.001892	0.048655	0.01242	0.120168	-0.000974	0.166674	0.083028	0.183997	0.166674
Pf3D7_07_v3	1390461	1392293	Pf3D7_07_v3	PF3D7_0732200	rifin	-0.153322	-0.109197	0.257121	-0.142328	-0.167002	-0.112658	-0.01505	-0.088724	0.982589	1.11994	1.00718	0.982589
Pf3D7_07_v3	1402373	1404228	Pf3D7_07_v3	PF3D7_0732500	rifin	0.075313	0.04323	0.160675	0.012748	0.107947	0.031287	-0.008859	0.02611	1.12766	1.12343	1.05483	1.12766
Pf3D7_07_v3	1410206	1412481	Pf3D7_07_v3	PF3D7_0732800	erythrocyte membrane protein 1 (PfEMP1), exon 2	-0.025257	-0.012382	0.22822	-0.12029	-0.013694	-0.068395	-0.071314	-0.107752	0.904026	0.844117	0.87078	0.904026
Pf3D7_07_v3	1414184	1415933	Pf3D7_07_v3	PF3D7_0732900	rifin	-0.072082	-0.189131	0.152674	-0.11232	-0.028437	-0.109598	-0.064043	-0.163254	0.858004	0.864611	0.86377	0.858004
Pf3D7_07_v3	1417338	1426484	Pf3D7_07_v3	PF3D7_0733000	erythrocyte membrane protein 1, PfEMP1	0.059302	-0.121935	0.110589	-0.056599	-0.041597	-0.088184	-0.072635	-0.099003	0.983514	0.883636	0.873933	0.983514
Pf3D7_08_v3	21111	28903	Pf3D7_08_v3	PF3D7_0800100	erythrocyte membrane protein 1, PfEMP1	0.068728	0.014836	0.357575	0.004759	0.048405	0.081155	-0.036428	-0.000364	1.12721	1.00752	1.09413	1.12721
Pf3D7_08_v3	29450	39283	Pf3D7_08_v3	PF3D7_0800200	erythrocyte membrane protein 1, PfEMP1	-0.165279	-0.14102	-0.037393	-0.225307	-0.090692	-0.151533	-0.091796	-0.206429	0.873906	0.879136	0.876183	0.873906
Pf3D7_08_v3	40698	51189	Pf3D7_08_v3	PF3D7_0800300	erythrocyte membrane protein 1, PfEMP1	-0.133637	-0.266681	0.065216	-0.193826	-0.175682	-0.190338	-0.188965	-0.167666	0.806518	0.831365	0.763449	0.806518
Pf3D7_08_v3	56102	57953	Pf3D7_08_v3	PF3D7_0800500	rifin	0.044231	-0.05319	0.145309	0.005563	-0.046202	-0.067645	-0.106869	0.018772	1.13511	1.03808	1.07685	1.13511
Pf3D7_08_v3	65466	72035	Pf3D7_08_v3	PF3D7_0800700	surface-associated interspersed protein 8.3 (SURFIN 8.3)	0.061599	-0.006374	0.131842	0.070626	-0.051041	-0.062837	-0.142002	0.000778	0.323247	0.191111	0.275443	0.323247
Pf3D7_08_v3	79573	80892	Pf3D7_08_v3	PF3D7_0800800	Plasmodium exported protein (hyp7), unknown function	-0.044638	-0.108158	-0.028395	-0.078333	-0.112886	-0.162116	-0.206016	-0.087528	0.2015	0.095763	0.13964	0.2015
Pf3D7_08_v3	82878	84154	Pf3D7_08_v3	PF3D7_0800900	Plasmodium exported protein (hyp7), unknown function, pseudogene	-0.016097	-0.058734	0.163603	-0.065453	-0.052707	-0.091674	-0.112335	-0.075737	0.160373	0.085534	0.147824	0.160373
Pf3D7_08_v3	84318	88672	Pf3D7_08_v3	PF3D7_0801000	Plasmodium exported protein (PHISTc), unknown function	0.017252	0.013875	0.275739	0.001212	0.017378	0.089027	0.010411	0.000351	0.254488	0.232476	0.224195	0.254488
Pf3D7_08_v3	91147	97821	Pf3D7_08_v3	PF3D7_0801100	28S ribosomal RNA	0.052057	-0.042787	0.057954	-0.051204	-0.009542	-0.011061	-0.057915	-0.034194	0.056652	-0.126538	0.06431	0.056652
Pf3D7_08_v3	98640	99301	Pf3D7_08_v3	PF3D7_0801200	5.8S ribosomal RNA	-0.013437	0.02556	-0.046126	0.007512	0.041539	0.018176	0.073589	-0.004301	0.091903	0.165737	0.031783	0.091903
Pf3D7_08_v3	101704	103076	Pf3D7_08_v3	PF3D7_0801300	von Willebrand factor A domain-related protein	-0.003491	-0.138145	-0.157812	-0.049516	-0.027315	-0.097594	-0.006579	-0.130354	-0.06654	-0.023782	-0.1174	-0.06654
Pf3D7_08_v3	104275	105138	Pf3D7_08_v3	PF3D7_0801400	conserved Plasmodium protein, unknown function	-0.038619	-0.108336	-8.1e-05	-0.043262	-0.039462	-0.138457	-0.089584	-0.043968	-0.014753	-0.224929	-0.121598	-0.014753
Pf3D7_08_v3	106343	108492	Pf3D7_08_v3	PF3D7_0801500	nucleolar protein 10, putative	0.010007	0.016529	0.058333	0.013645	0.031837	-8.4e-05	-0.007927	-0.024907	0.072105	0.118322	0.022911	0.072105
Pf3D7_08_v3	108930	109807	Pf3D7_08_v3	PF3D7_0801600	conserved protein, unknown function	-0.015571	-0.011101	0.055312	0.007579	-0.056774	-0.017531	-0.043542	-0.027268	0.029679	0.143806	-0.025072	0.029679
Pf3D7_08_v3	112049	118127	Pf3D7_08_v3	PF3D7_0801700	sentrin-specific protease 2, putative	0.014074	0.007279	0.116184	0.080204	0.053818	0.051231	0.094181	0.040069	0.196284	0.319138	0.10472	0.196284
Pf3D7_08_v3	118782	122317	Pf3D7_08_v3	PF3D7_0801800	mannose-6-phosphate isomerase, putative	-0.028246	-0.004203	0.097129	0.002105	0.026133	-0.018971	-0.00669	0.015783	0.096172	0.032271	0.015142	0.096172
Pf3D7_08_v3	128599	143087	Pf3D7_08_v3	PF3D7_0801900	lysine-specific histone demethylase, putative	-0.020353	0.107451	0.127006	0.190964	0.109375	0.091164	-0.009157	-0.038828	0.136499	0.157377	0.094525	0.136499
Pf3D7_08_v3	145839	150532	Pf3D7_08_v3	PF3D7_0802000	glutamate dehydrogenase, putative	0.049349	0.025416	0.030963	-0.010995	0.034665	0.008832	0.066207	-0.001128	-0.04463	0.083562	-0.004283	-0.04463
Pf3D7_08_v3	151558	159918	Pf3D7_08_v3	PF3D7_0802100	AP2 domain transcription factor, putative	0.008083	0.0076	0.022206	0.025275	-0.045919	-0.002984	0.06079	0.055828	0.055869	0.102773	0.077004	0.055869
Pf3D7_08_v3	165166	166328	Pf3D7_08_v3	PF3D7_0802200	1-cys peroxiredoxin	-0.004877	-0.013351	0.050714	0.008195	-0.011868	-0.020431	0.073185	0.046608	0.096264	0.172553	0.030269	0.096264
Pf3D7_08_v3	166819	170684	Pf3D7_08_v3	PF3D7_0802300	periodic tryptophan protein 2, putative	-0.003623	-0.042367	0.015829	0.01965	-0.010471	-0.025831	0.004991	0.004316	0.062169	0.062112	0.081519	0.062169
Pf3D7_08_v3	171615	174516	Pf3D7_08_v3	PF3D7_0802400	conserved Plasmodium protein, unknown function	-0.03594	-0.026189	0.043777	0.010991	-0.000156	0.006839	-0.020736	-0.027747	0.012688	0.094651	0.02599	0.012688
Pf3D7_08_v3	174517	179156	Pf3D7_08_v3	PF3D7_0802500	inositol 5-phosphatase, putative	0.004882	0.02135	0.025422	0.017725	0.001855	0.001577	0.036883	0.013148	0.013921	0.032085	0.057206	0.013921
Pf3D7_08_v3	180313	188339	Pf3D7_08_v3	PF3D7_0802600	adenylyl cyclase beta	0.074209	0.0383	0.151074	0.059544	0.01065	0.018878	0.018779	0.068827	0.116042	0.161892	0.133427	0.116042
Pf3D7_08_v3	188340	190566	Pf3D7_08_v3	PF3D7_0802700	conserved Plasmodium protein, unknown function	-0.060675	-0.01621	0.014794	-0.005929	-0.041015	-0.04839	0.003112	-0.017129	0.075574	0.073468	0.031148	0.075574
Pf3D7_08_v3	191726	194353	Pf3D7_08_v3	PF3D7_0802800	serine/threonine protein phosphatase 2B catalytic subunit A	-0.006166	-0.007714	0.053118	-0.022928	-0.024142	-0.025729	0.005751	-0.034077	0.031066	0.049495	0.023805	0.031066
Pf3D7_08_v3	194898	195928	Pf3D7_08_v3	PF3D7_0802900	conserved Plasmodium protein, unknown function	-0.073915	-0.02011	0.012014	0.013955	-0.067376	-0.022905	-0.01279	-0.01722	0.036234	0.181917	0.0434	0.036234
Pf3D7_08_v3	196331	198864	Pf3D7_08_v3	PF3D7_0803000	peptidyl-prolyl cis-trans isomerase	-0.037483	0.012728	0.086403	0.029523	-0.003626	0.033026	-0.000573	-0.003622	0.119329	0.132601	0.095143	0.119329
Pf3D7_08_v3	198931	203168	Pf3D7_08_v3	PF3D7_0803100	U3 small nucleolar RNA-associated protein 14, putative	-0.053622	-0.10865	-0.023511	-0.057469	-0.040802	0.023847	-0.057494	-0.067723	-0.070734	-0.158423	-0.005816	-0.070734
Pf3D7_08_v3	203991	206911	Pf3D7_08_v3	PF3D7_0803200	filament assembling protein, putative	-0.02988	0.024172	-0.03213	-0.035419	-0.040033	0.002462	-0.040076	-0.036877	-0.035909	0.042652	0.008165	-0.035909
Pf3D7_08_v3	208201	210541	Pf3D7_08_v3	PF3D7_0803300	mitogen-activated protein kinase organizer 1, putative	-0.134735	-0.071211	-0.073788	-0.187506	-0.127103	-0.004688	-0.032965	-0.043828	-0.129771	-0.147657	-0.16491	-0.129771
Pf3D7_08_v3	212002	216221	Pf3D7_08_v3	PF3D7_0803400	DNA repair and recombination protein RAD54, putative	0.010623	0.053731	0.087707	-0.015514	-0.066615	0.076351	0.008048	0.041119	-0.006345	0.084692	0.036997	-0.006345
Pf3D7_08_v3	217638	222541	Pf3D7_08_v3	PF3D7_0803500	AAA family ATPase, putative	-0.04067	0.000749	-0.016099	-0.053328	-0.049626	-0.00257	0.002939	-0.025256	-0.017935	0.019157	0.004676	-0.017935
Pf3D7_08_v3	223512	230459	Pf3D7_08_v3	PF3D7_0803600	conserved Plasmodium protein, unknown function	-0.070127	-0.010952	-0.013741	-0.12821	-0.045942	-0.008408	-0.035371	-0.041953	-0.020869	0.076574	0.000706	-0.020869
Pf3D7_08_v3	231148	233006	Pf3D7_08_v3	PF3D7_0803700	tubulin gamma chain	-0.033804	-0.005321	0.032336	-0.083829	-0.064705	-0.038572	0.052216	0.017276	-0.005393	0.159763	0.012364	-0.005393
Pf3D7_08_v3	233217	234676	Pf3D7_08_v3	PF3D7_0803800	proteasome subunit beta type-4	-0.029399	-0.005152	0.0195	-0.027405	-0.043253	-0.022424	-0.020638	-0.009769	0.045822	0.000385	0.036664	0.045822
Pf3D7_08_v3	237603	241298	Pf3D7_08_v3	PF3D7_0804000	cactin homolog, putative	-0.031364	-0.022875	0.0463	-0.032058	-0.084001	-0.018298	-0.023882	-0.009137	-0.005002	0.058961	0.005862	-0.005002
Pf3D7_08_v3	241853	245025	Pf3D7_08_v3	PF3D7_0804300	zinc finger protein, putative	0.022421	0.030434	0.033051	0.02666	0.012376	0.003586	0.026834	0.000538	0.032788	0.091422	0.04236	0.032788
Pf3D7_08_v3	245461	248183	Pf3D7_08_v3	PF3D7_0804400	methionine aminopeptidase 1c, putative	0.03491	0.066812	0.009109	0.001671	0.004915	-0.019975	0.026083	-0.009809	0.077962	0.110352	0.073634	0.077962
Pf3D7_08_v3	249833	268646	Pf3D7_08_v3	PF3D7_0804500	conserved Plasmodium membrane protein, unknown function	-0.036999	-0.127945	-0.065182	0.075907	-0.101855	-0.045069	-0.003498	-0.000906	0.047004	0.199576	0.096653	0.047004
Pf3D7_08_v3	268647	270946	Pf3D7_08_v3	PF3D7_0804600	tRNA pseudouridine synthase, putative	-0.03032	-0.030452	0.010598	0.001832	0.011461	0.024939	-0.049962	-0.037458	0.02654	0.133722	-0.013754	0.02654
Pf3D7_08_v3	271167	277663	Pf3D7_08_v3	PF3D7_0804700	conserved Plasmodium protein, unknown function	-0.051547	0.017403	0.058795	0.017009	0.01028	0.102858	0.067633	0.044399	0.047332	0.11986	0.034544	0.047332
Pf3D7_08_v3	278131	279284	Pf3D7_08_v3	PF3D7_0804800	peptidyl-prolyl cis-trans isomerase	0.098475	-0.041243	0.015719	0.031451	0.009408	0.024413	-0.005812	0.019722	-0.064249	-0.052072	-0.02353	-0.064249
Pf3D7_08_v3	279461	281436	Pf3D7_08_v3	PF3D7_0804900	GTPase-activating protein, putative	-0.014161	0.001893	0.030741	0.001923	-0.003076	0.010277	-0.013848	-0.000428	0.026655	0.011511	0.031146	0.026655
Pf3D7_08_v3	282816	284772	Pf3D7_08_v3	PF3D7_0805000	alpha/beta hydrolase, putative	-0.107621	-0.032964	-0.059494	-0.066855	-0.107495	-0.130764	0.026585	-0.050066	-0.011698	-0.078996	-0.06277	-0.011698
Pf3D7_08_v3	286709	288870	Pf3D7_08_v3	PF3D7_0805100	conserved protein, unknown function	0.040919	0.015527	-0.002644	0.047256	-0.010624	0.034387	0.03159	0.089352	0.049546	1.8e-05	0.077521	0.049546
Pf3D7_08_v3	290652	291433	Pf3D7_08_v3	PF3D7_0805200	gamete release protein, putative	0.015219	0.08696	0.033386	-0.04613	-0.061237	0.027519	0.005622	0.02562	-0.093291	-0.015319	-0.075205	-0.093291
Pf3D7_08_v3	292863	297121	Pf3D7_08_v3	PF3D7_0805300	conserved Plasmodium protein, unknown function	-0.052362	-0.054021	0.005386	-0.016345	-0.000356	0.011642	-0.019686	-0.018798	-0.018877	0.017883	-0.005742	-0.018877
Pf3D7_08_v3	303120	304846	Pf3D7_08_v3	PF3D7_0805400	N-acetyltransferase, GNAT family, putative	-0.085696	-0.028164	0.017569	-0.003778	-0.056867	-0.012034	-0.098417	-0.050662	-0.004688	0.176019	-0.010816	-0.004688
Pf3D7_08_v3	305045	308799	Pf3D7_08_v3	PF3D7_0805500	conserved Plasmodium protein, unknown function	-0.061283	0.003445	-0.061408	-0.032409	-0.041814	-0.02003	-0.056079	-0.035637	-0.063872	-0.051776	-0.056478	-0.063872
Pf3D7_08_v3	311784	313210	Pf3D7_08_v3	PF3D7_0805600	PAP2-like protein, putative	0.039935	-0.059368	0.004008	0.136636	0.020293	-0.006529	0.023001	0.007595	0.065182	-0.147226	0.074641	0.065182
Pf3D7_08_v3	313922	318976	Pf3D7_08_v3	PF3D7_0805700	serine/threonine protein kinase, FIKK family	-0.032143	-0.014804	-0.038091	-0.005018	-0.024653	0.034263	-0.001936	-0.04215	0.003795	-0.19064	0.001983	0.003795
Pf3D7_08_v3	322117	323927	Pf3D7_08_v3	PF3D7_0805800	conserved Plasmodium protein, unknown function	-0.069299	-0.053352	-0.11402	0.022575	0.025427	0.104267	-0.029781	-0.104036	0.014886	-0.16484	-0.04218	0.014886
Pf3D7_08_v3	324029	325905	Pf3D7_08_v3	PF3D7_0805900	conserved protein, unknown function	-0.048155	-0.044664	0.004445	-0.003771	-0.056234	0.006728	-0.03486	-0.022433	-0.057481	-0.083515	-0.008874	-0.057481
Pf3D7_08_v3	325965	330254	Pf3D7_08_v3	PF3D7_0806000	AAA family ATPase, putative	-0.102485	-0.013362	-0.015321	0.034381	-0.019621	-0.061604	0.023573	-0.015589	0.009975	-0.053247	0.02903	0.009975
Pf3D7_08_v3	330401	332928	Pf3D7_08_v3	PF3D7_0806100	conserved Plasmodium protein, unknown function	-0.034027	0.00052	0.025315	0.039596	0.001954	0.018216	0.005229	0.024377	-0.024418	-0.029093	-0.048243	-0.024418
Pf3D7_08_v3	333129	337814	Pf3D7_08_v3	PF3D7_0806200	Dpy-19-like C-mannosyltransferase, putative	0.08866	0.057598	-0.024027	0.012167	0.074399	0.002394	0.02351	0.049293	0.034827	-0.081915	0.064817	0.034827
Pf3D7_08_v3	337815	343504	Pf3D7_08_v3	PF3D7_0806300	ferlin-like protein, putative	-0.021704	0.038043	0.026863	0.067236	0.016776	0.059391	-0.051443	-0.043139	0.0327	0.028206	0.025328	0.0327
Pf3D7_08_v3	344038	345071	Pf3D7_08_v3	PF3D7_0806400	UDP-N-acetylglucosamine transferase subunit ALG13, putative	-0.022902	0.009502	-0.021846	0.015499	-0.033888	0.007837	-0.049464	-0.038633	0.032388	0.016524	0.016444	0.032388
Pf3D7_08_v3	345177	347704	Pf3D7_08_v3	PF3D7_0806500	DnaJ protein, putative	-0.004304	0.023519	0.057374	0.067467	-0.039666	0.03876	-0.032569	-0.028966	0.026855	-0.081428	0.06598	0.026855
Pf3D7_08_v3	349067	353612	Pf3D7_08_v3	PF3D7_0806600	kinesin-like protein, putative	0.000643	-0.050823	-0.002087	0.019206	-0.081403	-0.009931	-0.060418	-0.016426	-0.010538	0.063153	0.012449	-0.010538
Pf3D7_08_v3	354222	362646	Pf3D7_08_v3	PF3D7_0806700	conserved Plasmodium membrane protein, unknown function	-0.072197	-0.049688	-0.033106	-0.044802	-0.076763	-0.042239	-0.030419	-0.065961	-0.036749	0.040167	-0.037572	-0.036749
Pf3D7_08_v3	363010	366671	Pf3D7_08_v3	PF3D7_0806800	V-type proton ATPase subunit a, putative	-0.05004	-0.039837	-0.018114	0.0618	0.048949	0.005503	-0.012072	0.031363	0.005969	0.10844	0.050033	0.005969
Pf3D7_08_v3	368357	369996	Pf3D7_08_v3	PF3D7_0806900	conserved protein, unknown function	-0.026393	-0.032782	0.009934	-0.036844	-0.037955	-0.008635	-0.034606	-0.017481	-0.023718	0.046474	0.003255	-0.023718
Pf3D7_08_v3	370534	372762	Pf3D7_08_v3	PF3D7_0807000	YEATS domain-containing protein, putative	0.106349	0.067419	0.075197	0.085576	0.095477	0.059849	0.05899	0.080424	0.054444	0.06722	0.054883	0.054444
Pf3D7_08_v3	372763	377117	Pf3D7_08_v3	PF3D7_0807100	DNA helicase PSH3	-0.022271	0.027958	-0.019553	0.014771	0.010164	-0.009413	-0.011947	0.02079	0.003326	-0.018585	0.010516	0.003326
Pf3D7_08_v3	377774	379696	Pf3D7_08_v3	PF3D7_0807200	conserved Plasmodium membrane protein, unknown function	-0.010288	-0.014386	-0.037811	0.024337	-0.001035	-0.026892	0.016696	0.05912	0.020841	0.072608	0.030449	0.020841
Pf3D7_08_v3	381314	383097	Pf3D7_08_v3	PF3D7_0807300	ras-related protein Rab-18	-0.104259	-0.071694	-0.094103	-0.042252	0.020637	-0.046969	0.042741	-0.023749	-0.036128	-0.120097	-0.09634	-0.036128
Pf3D7_08_v3	384048	386047	Pf3D7_08_v3	PF3D7_0807400	coenzyme Q-binding protein COQ10 homolog, mitochondrial	0.012312	0.037982	0.130196	0.080585	0.034043	0.048307	0.089124	0.087272	0.109879	0.16037	0.055234	0.109879
Pf3D7_08_v3	386969	388614	Pf3D7_08_v3	PF3D7_0807500	proteasome subunit alpha type-6, putative	-0.088013	-0.085668	-0.128238	-0.06676	-0.065761	-0.052757	-0.109793	-0.079641	-0.104114	-0.114131	-0.097898	-0.104114
Pf3D7_08_v3	389346	394509	Pf3D7_08_v3	PF3D7_0807600	conserved Plasmodium protein, unknown function	-0.09254	-0.033419	-0.02359	-0.000443	-0.011924	-0.051098	-0.081367	-0.047395	-0.026687	-0.005581	-0.020484	-0.026687
Pf3D7_08_v3	395398	399037	Pf3D7_08_v3	PF3D7_0807700	serine protease DegP	0.144635	0.197461	0.158271	0.181802	0.080889	0.186676	0.037177	0.082505	0.239382	0.180201	0.163486	0.239382
Pf3D7_08_v3	399341	401610	Pf3D7_08_v3	PF3D7_0807800	26S proteasome regulatory subunit RPN10, putative	-0.061465	-0.025241	-0.118463	-0.036735	-0.067151	-0.013928	-0.131242	-0.090051	-0.025302	-0.174406	-0.094642	-0.025302
Pf3D7_08_v3	402345	404391	Pf3D7_08_v3	PF3D7_0807900	tyrosine--tRNA ligase	0.028822	0.064302	-0.015302	0.034809	0.05156	0.050132	0.036091	0.026581	-0.028838	0.065785	-0.073233	-0.028838
Pf3D7_08_v3	404746	409334	Pf3D7_08_v3	PF3D7_0808000	conserved Plasmodium protein, unknown function	-0.034307	0.011166	-0.06148	-0.027355	-0.015509	-0.018857	-0.011176	0.008822	-0.01382	0.028476	-0.052699	-0.01382
Pf3D7_08_v3	409686	415418	Pf3D7_08_v3	PF3D7_0808100	AP-3 complex subunit delta, putative	0.065488	0.054545	0.024487	0.053651	0.025782	0.049126	0.01433	0.035527	0.020516	0.033433	0.026068	0.020516
Pf3D7_08_v3	416094	418315	Pf3D7_08_v3	PF3D7_0808200	plasmepsin X	0.016237	0.004368	-0.032559	-0.013628	-0.017259	0.023113	0.003008	0.019233	-0.025659	0.039397	0.019334	-0.025659
Pf3D7_08_v3	421243	422890	Pf3D7_08_v3	PF3D7_0808300	ubiquitin regulatory protein, putative	0.051444	0.041151	0.03761	-0.011222	0.011911	-0.006581	0.002068	0.006951	0.01128	-0.0346	0.019373	0.01128
Pf3D7_08_v3	423277	424786	Pf3D7_08_v3	PF3D7_0808400	coatomer subunit epsilon, putative	0.028273	-0.024028	-0.045054	0.012506	0.044365	-0.00462	0.021723	0.02104	-0.037174	-0.147645	-0.003275	-0.037174
Pf3D7_08_v3	430915	439301	Pf3D7_08_v3	PF3D7_0808600	erythrocyte membrane protein 1, PfEMP1	0.026995	0.031647	0.037176	0.073686	0.028004	0.022186	-0.015607	0.036528	0.071578	-0.022744	0.013649	0.071578
Pf3D7_08_v3	440158	448312	Pf3D7_08_v3	PF3D7_0808700	erythrocyte membrane protein 1, PfEMP1	0.002568	-0.000392	-0.025782	0.01213	-0.005534	0.016488	0.03519	0.077615	-0.003668	0.048544	-0.003916	-0.003668
Pf3D7_08_v3	450365	452149	Pf3D7_08_v3	PF3D7_0808800	rifin	0.000613	0.096703	0.005835	0.019427	0.07929	0.026888	-0.013642	0.071074	-0.027256	0.112723	-0.017675	-0.027256
Pf3D7_08_v3	453553	455169	Pf3D7_08_v3	PF3D7_0808900	rifin	0.073912	0.127752	-0.058841	0.04602	0.030279	0.040689	0.011998	-0.002836	0.013407	0.042043	0.025676	0.013407
Pf3D7_08_v3	459062	466817	Pf3D7_08_v3	PF3D7_0809100	erythrocyte membrane protein 1, PfEMP1	-0.038393	0.097964	0.27673	0.027083	0.007834	0.067858	0.018209	0.040233	0.196114	0.226748	0.169472	0.196114
Pf3D7_08_v3	467693	472143	Pf3D7_08_v3	PF3D7_0809200	asparagine-rich antigen Pfa55-14	0.005034	0.099705	0.194969	0.035582	0.02254	0.082052	0.019418	0.055929	0.22214	0.222106	0.210731	0.22214
Pf3D7_08_v3	474003	475429	Pf3D7_08_v3	PF3D7_0809300	unspecified product	0.004861	-0.006129	0.040272	0.005299	0.038039	0.035232	-0.022835	0.057069	0.100836	0.046471	0.104424	0.100836
Pf3D7_08_v3	475430	478318	Pf3D7_08_v3	PF3D7_0809400	conserved protein, unknown function	-0.043043	-0.061474	-0.014275	0.004048	0.003471	-0.002701	-0.036297	0.034626	0.050634	0.041353	0.075777	0.050634
Pf3D7_08_v3	478319	479076	Pf3D7_08_v3	PF3D7_0809500	histone acetyltransferase subunit NuA4, putative	-0.006157	0.066843	0.24604	0.062056	0.042876	0.036813	0.004765	0.043163	0.15881	0.140447	0.196815	0.15881
Pf3D7_08_v3	479730	497632	Pf3D7_08_v3	PF3D7_0809600	peptidase family C50, putative	-0.057528	-0.084649	-0.042418	-0.00647	-0.034701	-0.046587	-0.00836	0.0018	-0.051084	-0.112132	-0.022512	-0.051084
Pf3D7_08_v3	499213	501819	Pf3D7_08_v3	PF3D7_0809700	RuvB-like helicase 1	0.065875	-0.044007	0.070106	0.051934	0.001068	0.066464	-0.013526	0.008388	-0.13631	-0.165241	-0.029983	-0.13631
Pf3D7_08_v3	502088	506948	Pf3D7_08_v3	PF3D7_0809800	conserved Plasmodium protein, unknown function	-0.086976	-0.107217	-0.084834	-0.002757	-0.041102	0.011421	-0.017291	-0.043625	-0.062009	-0.083934	-0.073705	-0.062009
Pf3D7_08_v3	507974	512678	Pf3D7_08_v3	PF3D7_0809900	JmjC domain-containing protein, putative	0.017845	-0.063477	0.066855	0.072132	0.057259	0.035839	-0.030477	0.055012	0.020812	-0.044166	-0.021869	0.020812
Pf3D7_08_v3	519081	520241	Pf3D7_08_v3	PF3D7_0810100	apicoplast ribosomal protein L33 precursor, putative	0.010677	-0.056892	-0.039445	0.028116	0.00711	-0.004562	0.028625	-0.003479	-0.047023	-0.109379	-0.038794	-0.047023
Pf3D7_08_v3	520937	524259	Pf3D7_08_v3	PF3D7_0810200	ABC1 family, putative	-0.026775	-0.037154	-0.005052	0.034047	0.03001	-0.019387	-0.052773	0.008529	-0.070288	0.003728	-0.035626	-0.070288
Pf3D7_08_v3	524808	527854	Pf3D7_08_v3	PF3D7_0810300	protein phosphatase PPM5, putative	0.018516	0.008054	0.061253	0.057281	0.042872	0.002487	0.069815	0.031351	0.019436	-0.019075	0.015372	0.019436
Pf3D7_08_v3	531970	534250	Pf3D7_08_v3	PF3D7_0810400	aquaporin, putative	0.006572	0.001742	0.033075	0.028147	0.016409	0.010323	0.035226	0.009005	-0.045571	-0.03811	-0.053054	-0.045571
Pf3D7_08_v3	534251	536869	Pf3D7_08_v3	PF3D7_0810500	protein phosphatase PPM7, putative	0.120156	0.057518	0.138272	0.106401	0.109939	0.129466	0.194927	0.138728	0.105002	0.209677	0.126739	0.105002
Pf3D7_08_v3	541721	545046	Pf3D7_08_v3	PF3D7_0810600	ATP-dependent RNA helicase DBP1, putative	-0.042076	-0.051051	0.025196	0.059891	0.001897	0.005853	0.027323	-0.013968	-0.002496	-0.094743	0.014896	-0.002496
Pf3D7_08_v3	545913	547615	Pf3D7_08_v3	PF3D7_0810700	conserved Plasmodium protein, unknown function	0.029148	-0.041706	-0.014823	0.015545	-0.032148	-0.01622	-0.065037	-0.058012	-0.051796	-0.130737	-0.016242	-0.051796
Pf3D7_08_v3	547950	550866	Pf3D7_08_v3	PF3D7_0810800	hydroxymethyldihydropterin pyrophosphokinase-dihydropteroate synthase	-0.120971	-0.061293	-0.075391	0.028146	-0.029778	0.036233	-0.061432	-0.07141	-0.093776	0.023115	-0.025682	-0.093776
Pf3D7_08_v3	550949	552678	Pf3D7_08_v3	PF3D7_0810900	conserved Plasmodium protein, unknown function	-0.039407	0.01338	0.015592	0.039695	0.034374	0.054777	0.064837	-0.021692	-0.03208	-0.000153	-0.01082	-0.03208
Pf3D7_08_v3	554187	557455	Pf3D7_08_v3	PF3D7_0811000	cullin-1, putative	0.043577	-0.005223	-0.073245	0.042112	0.035407	0.031117	0.045447	0.069598	0.00807	-0.079449	-0.002987	0.00807
Pf3D7_08_v3	557634	559756	Pf3D7_08_v3	PF3D7_0811100	mitochondrial carrier protein, putative	-0.026914	-0.047184	-0.024918	-0.030687	-0.000315	-0.029125	-0.051555	-0.057901	-0.03071	-0.05827	-0.006187	-0.03071
Pf3D7_08_v3	560494	564526	Pf3D7_08_v3	PF3D7_0811200	ER membrane protein complex subunit 1, putative	-0.029901	-0.007083	-0.040417	0.00097	-0.007336	-0.049913	0.01885	-0.084837	-0.04996	0.038105	-0.050013	-0.04996
Pf3D7_08_v3	567574	573398	Pf3D7_08_v3	PF3D7_0811300	CCR4-associated factor 1	-0.031734	0.122834	0.126507	0.087205	0.04464	0.037746	0.043777	0.03561	0.072043	0.093986	0.135051	0.072043
Pf3D7_08_v3	575736	578620	Pf3D7_08_v3	PF3D7_0811400	conserved protein, unknown function	-0.043974	-0.057973	-0.046461	0.015266	-0.048499	-0.004572	-0.045602	-0.043005	-0.035084	-0.11199	-0.042914	-0.035084
Pf3D7_08_v3	579233	582471	Pf3D7_08_v3	PF3D7_0811500	histone-arginine methyltransferase CARM1, putative	-0.013029	-0.017242	-0.018443	0.039069	0.04457	0.059668	-0.053201	-0.039864	0.039862	-0.038786	0.001653	0.039862
Pf3D7_08_v3	582733	587203	Pf3D7_08_v3	PF3D7_0811600	conserved protein, unknown function	0.05976	0.047462	-0.021845	0.065408	0.070213	0.026581	0.051596	0.034487	0.021849	-0.035108	0.074848	0.021849
Pf3D7_08_v3	589571	593569	Pf3D7_08_v3	PF3D7_0811700	conserved Plasmodium protein, unknown function	0.012312	-0.015587	-0.022603	0.013726	-0.040513	-0.024605	0.019847	0.038528	0.02547	-0.005334	0.015031	0.02547
Pf3D7_08_v3	593570	595662	Pf3D7_08_v3	PF3D7_0811800	conserved Plasmodium protein, unknown function	-0.018566	-0.050445	-0.002509	-0.073233	-0.037216	-0.069067	-0.010465	-0.021967	-0.07017	-0.07282	-0.034935	-0.07017
Pf3D7_08_v3	595940	600426	Pf3D7_08_v3	PF3D7_0811900	RNA-binding protein, putative	-0.00636	-0.062172	0.027543	0.065227	0.026921	-0.026497	-0.01328	0.01507	-0.017985	-0.036778	-0.05737	-0.017985
Pf3D7_08_v3	600427	602497	Pf3D7_08_v3	PF3D7_0812000	conserved protein, unknown function	0.023471	0.032638	-0.028155	-3e-05	-0.003615	-0.002734	0.00418	-0.015432	-0.023903	-0.018815	-0.024916	-0.023903
Pf3D7_08_v3	604673	613101	Pf3D7_08_v3	PF3D7_0812100	proteasome activator complex subunit 4, putative	-0.03946	-0.013775	-0.036288	-0.009092	-0.044573	0.01013	0.000313	0.023461	-0.033696	-0.120104	-0.019587	-0.033696
Pf3D7_08_v3	613102	614890	Pf3D7_08_v3	PF3D7_0812220	GTPase, putative	0.026161	0.0002	0.010529	0.121918	0.030444	0.022379	0.002698	0.024345	-0.066905	-0.067508	0.000628	-0.066905
Pf3D7_08_v3	614891	618071	Pf3D7_08_v3	PF3D7_0812200	trypsin-like serine protease, putative	0.029438	-0.057831	-0.001115	0.021771	-0.025464	-0.007198	-0.01509	-0.033936	-0.055414	-0.039656	-0.0409	-0.055414
Pf3D7_08_v3	618593	620478	Pf3D7_08_v3	PF3D7_0812300	sporozoite surface protein 3, putative	0.029277	0.02744	-0.058701	0.067358	-0.012286	0.048431	-0.100526	-0.081352	0.006093	-0.025699	-0.038191	0.006093
Pf3D7_08_v3	621555	623692	Pf3D7_08_v3	PF3D7_0812400	karyopherin alpha	-0.000151	0.036968	-0.004996	0.032522	0.045055	0.041311	0.035065	0.040451	0.036906	0.029271	-0.033089	0.036906
Pf3D7_08_v3	625819	629195	Pf3D7_08_v3	PF3D7_0812500	RNA-binding protein, putative	-0.065475	-0.0204	0.029809	0.031984	-0.050112	0.005571	-0.025575	0.017474	0.119117	0.033015	0.060452	0.119117
Pf3D7_08_v3	631334	632479	Pf3D7_08_v3	PF3D7_0812600	ubiquitin-conjugating enzyme E2, putative	0.060131	0.063039	0.060876	0.123013	0.080353	0.09857	0.068949	0.026691	0.063549	0.13126	0.03407	0.063549
Pf3D7_08_v3	633740	634947	Pf3D7_08_v3	PF3D7_0812700	U1 small nuclear ribonucleoprotein C, putative	-0.126744	-0.138149	-0.076248	-0.121679	-0.047207	-0.11188	0.035517	-0.064506	-0.020553	-0.151779	-0.064419	-0.020553
Pf3D7_08_v3	636378	641708	Pf3D7_08_v3	PF3D7_0812900	conserved Plasmodium protein, unknown function	-0.017192	0.022125	0.004875	0.051377	0.04173	0.028967	0.099425	0.019047	0.082914	-0.00276	0.004799	0.082914
Pf3D7_08_v3	642836	645135	Pf3D7_08_v3	PF3D7_0813000	conserved protein, unknown function	-0.039502	0.058672	-0.001717	-0.03318	0.008428	0.011863	0.020495	0.02047	-0.033961	-0.007875	-0.019814	-0.033961
Pf3D7_08_v3	647066	649554	Pf3D7_08_v3	PF3D7_0813100	conserved Plasmodium protein, unknown function	-0.052309	-0.057608	0.029911	-0.05897	0.024211	0.028987	0.00349	0.022197	0.076901	0.048708	0.0139	0.076901
Pf3D7_08_v3	651167	653054	Pf3D7_08_v3	PF3D7_0813200	CS domain protein, putative	0.013122	-0.104023	-0.009003	0.013802	-0.087013	-0.013839	0.030157	-0.032419	-0.059266	0.077049	-0.077691	-0.059266
Pf3D7_08_v3	655828	657880	Pf3D7_08_v3	PF3D7_0813300	conserved protein, unknown function	-0.050007	-0.062459	-0.059396	-0.05814	-0.01315	-0.019172	-0.004487	-0.022627	-0.068508	-0.126462	-0.070829	-0.068508
Pf3D7_08_v3	658243	662345	Pf3D7_08_v3	PF3D7_0813400	conserved protein, unknown function	0.047388	0.007845	-0.015734	0.005585	0.011057	-0.017656	0.071923	-0.030658	-0.040412	-0.098021	-0.006137	-0.040412
Pf3D7_08_v3	665298	667345	Pf3D7_08_v3	PF3D7_0813500	PUB domain-containing protein, putative	-0.02665	-0.0428	-0.076298	-0.050841	-0.019784	-0.055899	0.002788	-2.8e-05	-0.121383	-0.067168	-0.142104	-0.121383
Pf3D7_08_v3	669291	670945	Pf3D7_08_v3	PF3D7_0813600	translation initiation factor SUI1, putative	-0.085327	0.056762	-0.069472	-0.052062	-0.06379	0.029199	-0.032295	0.011814	-0.029451	-0.058351	-0.088009	-0.029451
Pf3D7_08_v3	670946	675666	Pf3D7_08_v3	PF3D7_0813700	ABC transporter F family member 1	-0.091826	-0.050459	-0.14987	-0.126983	-0.151441	-0.146269	-0.071338	-0.007549	-0.128631	-0.054711	-0.138522	-0.128631
Pf3D7_08_v3	676141	677714	Pf3D7_08_v3	PF3D7_0813800	GDP-mannose 4,6-dehydratase	-0.024331	-0.009366	-0.061949	0.013541	-0.017148	-0.024567	0.04198	0.006321	0.010798	0.082022	-0.013527	0.010798
Pf3D7_08_v3	677739	678975	Pf3D7_08_v3	PF3D7_0813900	40S ribosomal protein S16, putative	0.120323	0.129809	0.093166	0.133509	0.089104	0.112158	0.047369	0.029805	0.094545	-0.0624	0.130135	0.094545
Pf3D7_08_v3	680707	682059	Pf3D7_08_v3	PF3D7_0814000	60S ribosomal protein L13-2, putative	-0.017713	0.032548	0.076097	0.022942	0.118946	0.027296	-0.041044	0.002339	0.139296	-0.036234	0.087205	0.139296
Pf3D7_08_v3	682268	683822	Pf3D7_08_v3	PF3D7_0814100	conserved Plasmodium protein, unknown function	-0.034463	-0.059451	-0.051178	-0.032306	0.01498	0.0095	-0.063044	-0.038769	-0.074195	-0.09767	-0.015106	-0.074195
Pf3D7_08_v3	687090	688336	Pf3D7_08_v3	PF3D7_0814200	DNA/RNA-binding protein Alba 1	-0.023913	-0.004286	-0.046462	-0.014871	0.005002	-0.054472	0.029843	-0.023632	0.000658	0.07393	-0.061075	0.000658
Pf3D7_08_v3	690291	694393	Pf3D7_08_v3	PF3D7_0814300	AAA family ATPase, putative	0.031107	-0.000333	0.004079	0.02864	-0.04397	-0.023034	0.043832	0.008744	0.042447	0.088685	-0.018888	0.042447
Pf3D7_08_v3	694965	697772	Pf3D7_08_v3	PF3D7_0814400	phospholipase DDHD1, putative	0.085319	0.010669	0.040002	-0.034533	0.059245	0.065487	0.027976	0.111116	0.05493	0.111253	0.043582	0.05493
Pf3D7_08_v3	700126	702902	Pf3D7_08_v3	PF3D7_0814500	conserved protein, unknown function	-0.025562	0.047189	0.114573	-0.122591	-0.005216	0.005783	-0.033705	-0.008168	-0.093072	0.019918	-0.093831	-0.093072
Pf3D7_08_v3	703252	704933	Pf3D7_08_v3	PF3D7_0814600	conserved protein, unknown function	0.029823	-0.049458	0.110487	-0.056775	-0.010756	-0.059586	0.036474	0.003578	0.087039	-0.054817	0.096741	0.087039
Pf3D7_08_v3	705826	707246	Pf3D7_08_v3	PF3D7_0814700	conserved Plasmodium protein, unknown function	-0.069663	-0.005054	-0.023912	-0.001953	0.025894	0.002514	0.045317	0.021411	-0.044976	-0.017515	-0.053435	-0.044976
Pf3D7_08_v3	707978	709074	Pf3D7_08_v3	PF3D7_0814900	superoxide dismutase [Fe]	0.036757	-0.017276	-0.028386	0.001784	0.025684	-0.063233	-0.003047	-0.022532	-0.007181	-0.098459	-0.020474	-0.007181
Pf3D7_08_v3	709083	710850	Pf3D7_08_v3	PF3D7_0815000	selenoprotein	0.01761	-0.022544	-0.068032	0.062487	0.058717	-0.029134	0.073502	0.046148	-0.043652	-0.129953	0.001069	-0.043652
Pf3D7_08_v3	710989	714416	Pf3D7_08_v3	PF3D7_0815100	heptatricopeptide repeat and RAP domain-containing protein, putative	-0.001041	-0.027981	-0.021725	0.039795	-0.042777	-0.010174	0.002354	-0.008748	0.054009	0.103672	0.027378	0.054009
Pf3D7_08_v3	716863	719996	Pf3D7_08_v3	PF3D7_0815200	importin subunit beta, putative	0.046219	-0.060283	0.0328	0.023629	0.055849	-0.063652	0.107169	0.040166	-0.048089	-0.079878	-0.033819	-0.048089
Pf3D7_08_v3	721678	725628	Pf3D7_08_v3	PF3D7_0815300	FAD-dependent monooxygenase, putative	-0.096744	-0.074627	-0.060785	0.018652	-0.029265	-0.07202	-0.007708	-0.129299	0.007029	-0.026968	-0.036141	0.007029
Pf3D7_08_v3	725629	726752	Pf3D7_08_v3	PF3D7_0815400	ATP synthase-associated protein, putative	-0.060994	-0.046511	-0.125208	-0.057838	-0.006857	-0.105132	0.0204	-0.145444	-0.0996	-0.080634	-0.123288	-0.0996
Pf3D7_08_v3	727412	729822	Pf3D7_08_v3	PF3D7_0815500	conserved Plasmodium protein, unknown function	0.053981	-0.006261	0.03204	0.057349	0.053508	0.072475	0.021971	0.020645	0.010723	-0.108247	-0.027166	0.010723
Pf3D7_08_v3	729823	732437	Pf3D7_08_v3	PF3D7_0815600	eukaryotic translation initiation factor 3 subunit G, putative	-0.037945	-0.024379	0.026638	0.020138	-0.021197	-0.044912	0.022091	0.023601	-0.007439	-0.074064	-0.052823	-0.007439
Pf3D7_08_v3	733029	734823	Pf3D7_08_v3	PF3D7_0815700	ubiquitin	0.003374	-0.012833	0.019407	0.044551	0.058625	0.002971	0.084339	0.044643	0.036393	-0.029122	-0.03469	0.036393
Pf3D7_08_v3	735430	741431	Pf3D7_08_v3	PF3D7_0815800	vacuolar protein sorting-associated protein 9, putative	0.012253	0.059673	0.07703	0.05942	0.05148	0.049548	0.171504	0.101012	0.138001	0.039177	0.068312	0.138001
Pf3D7_08_v3	743255	745755	Pf3D7_08_v3	PF3D7_0815900	dihydrolipoyl dehydrogenase, apicoplast	0.028375	0.009738	-0.034648	0.102032	0.016452	0.013473	0.010621	0.079538	0.000385	0.0532	0.001428	0.000385
Pf3D7_08_v3	745763	747738	Pf3D7_08_v3	PF3D7_0816000	ribosome assembly protein RRB1, putative	-0.003636	0.007962	0.092182	0.060617	0.044002	0.048028	0.009655	0.062869	0.108827	0.053339	0.021309	0.108827
Pf3D7_08_v3	748403	749852	Pf3D7_08_v3	PF3D7_0816100	phosphopantothenoylcysteine decarboxylase, putative	-0.040246	-0.056287	-0.096031	0.052272	-0.044295	0.021037	-0.025661	0.010986	0.033055	-0.205817	-0.089714	0.033055
Pf3D7_08_v3	749853	750961	Pf3D7_08_v3	PF3D7_0816200	vacuolar protein sorting-associated protein 2, putative	0.015097	0.017119	-0.004853	0.023016	0.01116	-0.010102	0.017919	-0.004289	-0.040693	-0.021642	-0.061255	-0.040693
Pf3D7_08_v3	751692	756423	Pf3D7_08_v3	PF3D7_0816300	conserved Plasmodium protein, unknown function	0.042457	-0.026847	0.047568	-0.015045	-0.018496	0.015331	0.020464	0.028874	0.006683	-0.016725	-0.035536	0.006683
Pf3D7_08_v3	756974	758457	Pf3D7_08_v3	PF3D7_0816400	EF-hand calcium-binding domain-containing protein, putative	0.029121	-0.011456	-0.017541	-0.000916	-0.017528	-0.011775	0.030154	0.017135	-0.01885	-0.043972	-0.016782	-0.01885
Pf3D7_08_v3	759888	761281	Pf3D7_08_v3	PF3D7_0816500	small heat shock protein HSP20, putative	-0.022223	0.068809	0.032944	0.000407	-0.023345	0.073163	-0.008667	-0.01231	0.08674	0.18945	0.050085	0.08674
Pf3D7_08_v3	761868	765580	Pf3D7_08_v3	PF3D7_0816600	chaperone protein ClpB1	0.038405	0.013052	-0.084883	-0.065704	-0.055057	-0.000905	0.104724	0.121518	-0.029561	-0.05767	-0.045339	-0.029561
Pf3D7_08_v3	767899	770042	Pf3D7_08_v3	PF3D7_0816800	meiotic recombination protein DMC1, putative	0.028462	0.043907	-0.005838	0.043716	0.025828	0.004695	-0.001317	0.038093	0.015829	-0.126147	0.026392	0.015829
Pf3D7_08_v3	770696	772023	Pf3D7_08_v3	PF3D7_0816900	adenylate kinase 2	0.002987	-0.094577	0.000981	0.065897	-0.052498	-0.04571	-0.054951	-0.024112	-0.030259	0.010108	-0.034819	-0.030259
Pf3D7_08_v3	772318	773987	Pf3D7_08_v3	PF3D7_0817000	NEDD8-activating enzyme E1 catalytic subunit, putative	-0.008484	0.079254	0.032269	0.029242	0.031248	0.035186	0.077771	0.098686	0.030691	0.00622	0.021803	0.030691
Pf3D7_08_v3	774049	777024	Pf3D7_08_v3	PF3D7_0817100	tRNA modification GTPase, putative	-0.067394	-0.030876	0.013373	-0.023111	-0.024499	-0.063279	-0.003853	-0.037316	-0.02363	-0.102813	-0.034697	-0.02363
Pf3D7_08_v3	777025	779897	Pf3D7_08_v3	PF3D7_0817200	conserved protein, unknown function	0.093474	0.147174	0.038181	0.092395	0.053811	0.064049	0.071277	0.154698	0.102844	0.170222	0.04728	0.102844
Pf3D7_08_v3	782659	789866	Pf3D7_08_v3	PF3D7_0817300	conserved Plasmodium protein, unknown function	0.139489	0.030523	0.162901	0.177602	0.132569	0.117423	0.169231	0.15195	0.177728	-0.07908	0.118071	0.177728
Pf3D7_08_v3	794037	798056	Pf3D7_08_v3	PF3D7_0817400	phosphatase, putative	-0.004545	-0.062918	-0.015507	-0.031622	-0.052213	-0.038461	-0.097314	-0.026174	-0.106414	-0.218078	-0.13142	-0.106414
Pf3D7_08_v3	798527	800455	Pf3D7_08_v3	PF3D7_0817500	histidine triad nucleotide-binding protein 1	0.058982	0.004074	-0.019218	0.036559	0.053958	0.028554	0.07515	0.045319	-0.027534	-0.070836	-0.039567	-0.027534
Pf3D7_08_v3	800670	804284	Pf3D7_08_v3	PF3D7_0817600	conserved protein, unknown function	-0.028354	-0.028947	-0.105321	0.089572	0.015954	0.054598	0.02993	0.012581	-0.010015	-0.192607	-0.006783	-0.010015
Pf3D7_08_v3	805547	813715	Pf3D7_08_v3	PF3D7_0817700	rhoptry neck protein 5	-0.026297	-0.03687	-0.042832	0.010031	0.019827	0.003459	0.045629	-0.023054	-0.05141	-0.09596	-0.050341	-0.05141
Pf3D7_08_v3	816553	817352	Pf3D7_08_v3	PF3D7_0817900	high mobility group protein B2	-0.041187	-0.032857	-0.098977	-0.058859	0.038981	-0.023964	-0.015452	-0.016628	-0.050307	-0.082249	-0.030575	-0.050307
Pf3D7_08_v3	821084	822702	Pf3D7_08_v3	PF3D7_0818000	U4/U6.U5 small nuclear ribonucleoprotein, putative	0.028726	-0.013371	-0.004787	0.070648	0.034406	-0.015383	-0.006929	0.006706	-0.064431	-0.076259	0.000702	-0.064431
Pf3D7_08_v3	824314	826768	Pf3D7_08_v3	PF3D7_0818100	zinc finger protein, putative	0.015897	0.012497	-0.053144	0.001024	0.003305	0.046305	-0.008399	-0.016566	-0.084661	-0.071315	-0.056938	-0.084661
Pf3D7_08_v3	829756	831704	Pf3D7_08_v3	PF3D7_0818200	14-3-3 protein	0.003783	0.017675	-0.001144	-0.003718	0.005008	0.03068	-0.028055	0.069353	-0.012207	0.025772	0.001113	-0.012207
Pf3D7_08_v3	832935	835584	Pf3D7_08_v3	PF3D7_0818300	dynactin subunit 6, putative	0.04006	-0.020613	-0.079358	0.087629	0.065275	-0.005349	-0.032965	0.04709	0.027324	-0.250916	0.041008	0.027324
Pf3D7_08_v3	835728	837098	Pf3D7_08_v3	PF3D7_0818400	rRNA-processing protein FCF1, putative	-0.089141	-0.017461	-0.121075	-0.0492	-0.027634	-0.028586	0.037976	0.002917	-0.050018	0.018237	-0.069497	-0.050018
Pf3D7_08_v3	842067	843465	Pf3D7_08_v3	PF3D7_0818500	zinc finger protein, putative	0.056427	0.078475	-0.003488	0.04627	0.04969	0.062472	-0.02079	0.081822	0.037186	-0.02349	0.04316	0.037186
Pf3D7_08_v3	845003	847630	Pf3D7_08_v3	PF3D7_0818600	BEM46-like protein, putative	-0.001503	-0.038138	-0.106405	-0.074697	-0.032949	-0.020441	-0.029091	-0.019254	-0.133805	-0.22518	-0.100309	-0.133805
Pf3D7_08_v3	848027	853197	Pf3D7_08_v3	PF3D7_0818700	DNA helicase, putative	-0.075979	-0.184721	-0.065426	-0.048506	-0.016992	-0.066972	-0.064147	-0.192398	-0.146006	-0.289775	-0.056306	-0.146006
Pf3D7_08_v3	855404	856992	Pf3D7_08_v3	PF3D7_0818800	U3 small nucleolar ribonucleoprotein protein IMP4, putative	-0.126499	-0.124414	-0.19971	-0.108105	-0.109403	-0.11332	-0.053841	-0.004996	-0.173039	-0.256385	-0.184426	-0.173039
Pf3D7_08_v3	860134	862667	Pf3D7_08_v3	PF3D7_0818900	heat shock protein 70	-0.011275	0.048572	-0.021473	0.066376	0.009937	0.045501	0.043531	0.059736	-0.013024	-0.040205	-0.006424	-0.013024
Pf3D7_08_v3	863255	868387	Pf3D7_08_v3	PF3D7_0819000	conserved Plasmodium protein, unknown function	0.004401	-0.02343	-0.089882	-0.069351	-0.029639	-0.052421	-0.033323	-0.022471	-0.042282	-0.163494	-0.086547	-0.042282
Pf3D7_08_v3	869312	870824	Pf3D7_08_v3	PF3D7_0819100	BRIX domain, putative	0.031343	-0.041649	-0.11963	-0.031901	-0.004944	-0.026899	0.00379	-0.025564	-0.039545	-0.099464	-0.028318	-0.039545
Pf3D7_08_v3	871160	873690	Pf3D7_08_v3	PF3D7_0819200	perforin-like protein 5	0.094201	0.0688	0.073536	0.022398	0.072502	0.058984	0.029169	0.076305	0.077101	-0.064553	0.066849	0.077101
Pf3D7_08_v3	874117	877748	Pf3D7_08_v3	PF3D7_0819300	conserved Plasmodium protein, unknown function	-0.03338	0.008856	-0.066088	-0.104722	-0.001846	-0.023448	0.043566	0.025472	-0.059223	-0.134077	-0.057945	-0.059223
Pf3D7_08_v3	878245	880709	Pf3D7_08_v3	PF3D7_0819400	perforin-like protein 4	-0.063353	0.036133	-0.141341	-0.052878	0.025602	-0.01211	-0.051218	0.02274	-0.096242	0.044915	0.03245	-0.096242
Pf3D7_08_v3	881340	884640	Pf3D7_08_v3	PF3D7_0819500	conserved protein, unknown function	0.028334	0.009715	-0.005402	0.035497	-0.009555	0.012425	0.046709	0.022898	0.014499	-0.0059	0.025601	0.014499
Pf3D7_08_v3	884948	886386	Pf3D7_08_v3	PF3D7_0819600	conserved protein, unknown function	-0.058158	0.02514	-0.025783	0.02106	0.079471	0.018961	-0.012587	0.013542	-0.003728	-0.146882	0.046296	-0.003728
Pf3D7_08_v3	887876	890721	Pf3D7_08_v3	PF3D7_0819700	conserved Plasmodium protein, unknown function	-0.089728	-0.094628	-0.092496	-0.077101	-0.083428	-0.033375	-0.017665	-0.048448	-0.08586	-0.172785	-0.141955	-0.08586
Pf3D7_08_v3	891408	898752	Pf3D7_08_v3	PF3D7_0819800	conserved Plasmodium protein, unknown function	0.002328	0.055569	0.001973	0.011974	0.067804	-0.054968	0.01842	0.02495	-0.037517	-0.016078	-0.018451	-0.037517
Pf3D7_08_v3	900492	907964	Pf3D7_08_v3	PF3D7_0820000	Snf2-related CBP activator, putative	-0.020196	-0.023097	-0.029613	0.012517	0.013744	0.016522	-0.069589	-0.081502	-0.018725	0.023124	-0.049636	-0.018725
Pf3D7_08_v3	908957	910966	Pf3D7_08_v3	PF3D7_0820100	RNA-binding protein, putative	-0.029545	0.092673	0.010769	0.011644	-0.00385	0.025834	0.084809	0.05601	-0.049779	-0.042548	-0.042337	-0.049779
Pf3D7_08_v3	912014	914499	Pf3D7_08_v3	PF3D7_0820200	phosphatidylglycerophosphate synthase	0.011951	-0.000827	-0.049243	-0.019308	-0.004267	0.024631	-0.008883	-0.004774	-0.046332	-0.123633	-0.045959	-0.046332
Pf3D7_08_v3	918805	921146	Pf3D7_08_v3	PF3D7_0820300	conserved Plasmodium protein, unknown function	-0.013824	0.025651	-0.020723	0.017825	0.035489	0.016553	0.046659	0.026796	-0.023085	-0.007232	-0.012794	-0.023085
Pf3D7_08_v3	921958	924182	Pf3D7_08_v3	PF3D7_0820400	conserved Plasmodium protein, unknown function	0.023475	0.095017	-0.058579	0.054708	0.039982	0.021919	0.043926	0.000409	-0.004983	0.001262	0.003597	-0.004983
Pf3D7_08_v3	924863	927921	Pf3D7_08_v3	PF3D7_0820500	protein transport protein YIF1, putative	-0.0684	-0.037735	-0.011771	-0.047918	-0.016246	0.048002	0.048392	-0.022245	-0.071862	-0.155484	-0.082278	-0.071862
Pf3D7_08_v3	928895	931111	Pf3D7_08_v3	PF3D7_0820600	conserved protein, unknown function	0.025295	0.109986	0.073086	0.069507	0.057567	0.054222	0.097013	0.088721	-0.009896	0.035607	-0.008506	-0.009896
Pf3D7_08_v3	932071	935876	Pf3D7_08_v3	PF3D7_0820700	2-oxoglutarate dehydrogenase E1 component	-0.016759	0.014213	0.036105	0.004511	0.058968	-0.028829	0.088304	0.08502	0.010819	-0.031704	0.001336	0.010819
Pf3D7_08_v3	936176	939126	Pf3D7_08_v3	PF3D7_0820800	conserved Plasmodium protein, unknown function	-0.054753	-0.041526	-0.055443	-0.005426	-0.048137	-0.039399	0.000946	-0.009137	-0.068734	-0.146986	-0.073079	-0.068734
Pf3D7_08_v3	939333	944895	Pf3D7_08_v3	PF3D7_0820900	conserved Plasmodium protein, unknown function	0.090573	-0.026169	-0.063072	0.00568	0.034859	-0.009803	0.015747	0.006686	-0.043064	-0.111227	-0.000418	-0.043064
Pf3D7_08_v3	948495	951149	Pf3D7_08_v3	PF3D7_0821000	conserved Plasmodium protein, unknown function	-0.039065	-0.02516	-0.025688	-0.019992	0.019916	0.018282	-0.038421	-0.01026	-0.023387	-0.08114	-0.029434	-0.023387
Pf3D7_08_v3	953198	956564	Pf3D7_08_v3	PF3D7_0821100	protein kinase 1	-0.015385	-0.024346	-0.018037	-0.018984	-0.029702	0.025177	-0.008109	0.012282	-0.082157	-0.214499	-0.062044	-0.082157
Pf3D7_08_v3	957248	958302	Pf3D7_08_v3	PF3D7_0821200	conserved protein, unknown function	-0.044959	-0.007513	-0.108042	-0.028518	-0.022788	-0.023628	0.054524	-0.040131	-0.065059	-0.053074	-0.101094	-0.065059
Pf3D7_08_v3	958303	961990	Pf3D7_08_v3	PF3D7_0821300	ATP-dependent RNA helicase DHX36, putative	-0.118173	-0.039183	-0.052962	-0.013591	-0.055849	-0.010162	-0.110972	-0.002648	-0.052449	-0.147086	-0.054476	-0.052449
Pf3D7_08_v3	965572	966907	Pf3D7_08_v3	PF3D7_0821400	conserved Plasmodium protein, unknown function	-0.031232	0.007582	-0.081091	-0.019991	0.005731	-0.01369	-0.006078	-0.029723	0.026214	-0.101604	-0.043926	0.026214
Pf3D7_08_v3	967651	968990	Pf3D7_08_v3	PF3D7_0821500	ribosomal RNA small subunit methyltransferase NEP1, putative	-0.136175	-0.133534	-0.097499	-0.076677	-0.022953	-0.107654	0.040765	-0.140279	-0.072278	-0.16773	-0.149779	-0.072278
Pf3D7_08_v3	969440	971964	Pf3D7_08_v3	PF3D7_0821600	polyribonucleotide 5'-hydroxyl-kinase Clp1, putative	-0.00725	0.045106	-0.018675	0.005292	-0.002001	-0.007301	-0.023902	0.04704	-0.021822	-0.01099	-0.025858	-0.021822
Pf3D7_08_v3	973336	974517	Pf3D7_08_v3	PF3D7_0821700	60S ribosomal protein L22, putative	0.064112	0.108985	0.060979	0.013096	-0.053022	-0.062791	-0.034566	0.053305	0.001798	-0.189202	-0.05934	0.001798
Pf3D7_08_v3	975824	976894	Pf3D7_08_v3	PF3D7_0821800	protein transport protein SEC61 subunit beta, putative	-0.012823	0.016285	0.099288	0.045074	0.060668	-0.067555	-0.081372	0.03211	-0.066718	-0.223647	0.004568	-0.066718
Pf3D7_08_v3	977182	978438	Pf3D7_08_v3	PF3D7_0821900	conserved protein, unknown function	-0.085837	-0.02182	-0.070945	-0.057489	-0.031688	-0.039517	0.01911	-8.7e-05	-0.0944	-0.100952	-0.078783	-0.0944
Pf3D7_08_v3	978548	980826	Pf3D7_08_v3	PF3D7_0822000	ribosomal protein L4, mitochondrial, putative	-0.074428	-0.017643	0.001505	0.036783	0.075476	0.011237	-0.102556	0.010684	-0.106708	-0.190185	-0.219477	-0.106708
Pf3D7_08_v3	980827	981972	Pf3D7_08_v3	PF3D7_0822100	mediator of RNA polymerase II transcription subunit 7, putative	0.082944	-0.072028	-0.071103	0.074472	0.075999	0.054112	0.057141	0.108923	0.030176	-0.028341	0.118833	0.030176
Pf3D7_08_v3	982320	987946	Pf3D7_08_v3	PF3D7_0822200	phosphorylated CTD interacting factor 1 WW domain-containing protein, putative	0.032842	-0.060728	-0.13369	0.053875	-0.03694	-0.023083	-0.08453	-0.060615	-0.081355	-0.108593	-0.126018	-0.081355
Pf3D7_08_v3	990000	992631	Pf3D7_08_v3	PF3D7_0822400	conserved Plasmodium protein, unknown function	0.010942	-0.038703	0.075408	0.067185	0.056145	0.084736	0.003586	0.061711	0.08096	0.090841	0.018488	0.08096
Pf3D7_08_v3	992632	994215	Pf3D7_08_v3	PF3D7_0822500	dynein light chain 1	-0.011056	-0.019523	-0.016492	0.051364	-0.018613	0.031643	-0.004654	0.073424	-0.045942	-0.01961	0.08923	-0.045942
Pf3D7_08_v3	996805	999779	Pf3D7_08_v3	PF3D7_0822600	protein transport protein SEC23	0.07003	0.017072	0.008288	0.025409	0.05634	-0.014734	0.006287	0.053645	0.028589	0.020187	0.091981	0.028589
Pf3D7_08_v3	1000731	1004005	Pf3D7_08_v3	PF3D7_0822700	thrombospondin-related protein 1, putative	0.121972	-0.028164	0.035312	0.075894	0.075156	0.05967	0.119923	0.010365	0.012774	-0.100294	0.011289	0.012774
Pf3D7_08_v3	1005586	1007060	Pf3D7_08_v3	PF3D7_0822800	U5 small nuclear ribonucleoprotein 40 kDa protein, putative	-0.010939	-0.020011	-0.01474	-0.049728	-0.04495	0.060019	-0.045577	-0.030543	-0.063125	-0.06448	-0.144758	-0.063125
Pf3D7_08_v3	1007527	1011557	Pf3D7_08_v3	PF3D7_0822900	conserved Plasmodium protein, unknown function	-0.027402	-0.016373	-0.004925	-0.039971	-0.004923	0.020968	-0.001781	-0.007565	-0.014622	-0.081531	-0.048103	-0.014622
Pf3D7_08_v3	1012677	1017626	Pf3D7_08_v3	PF3D7_0823000	serine/threonine protein kinase VPS15, putative	-0.060006	-0.027534	-0.018214	-0.044817	-0.019542	-0.048046	-0.03139	-0.028419	-0.012693	-0.255719	-0.049928	-0.012693
Pf3D7_08_v3	1017839	1019518	Pf3D7_08_v3	PF3D7_0823100	RWD domain-containing protein, putative	-0.107982	-0.107118	-0.105469	-0.004756	0.015736	-0.062335	0.002159	-0.060262	-0.087449	-0.138364	-0.120971	-0.087449
Pf3D7_08_v3	1022379	1024096	Pf3D7_08_v3	PF3D7_0823200	RNA-binding protein, putative	0.036439	-0.022248	0.002377	0.043413	0.036497	0.02214	-0.001927	0.024104	-0.037243	-0.041641	-0.022311	-0.037243
Pf3D7_08_v3	1028502	1033764	Pf3D7_08_v3	PF3D7_0823300	histone acetyltransferase GCN5	0.017663	0.016014	0.03382	-0.003796	0.069286	0.049161	0.03588	0.003084	-0.021024	-0.031125	-0.012466	-0.021024
Pf3D7_08_v3	1034167	1036678	Pf3D7_08_v3	PF3D7_0823400	alpha/beta hydrolase, putative	-0.004493	0.018504	-0.06332	-0.066078	0.047222	-0.085605	-0.022051	-0.012446	-0.028112	-0.153527	-0.085997	-0.028112
Pf3D7_08_v3	1036850	1038858	Pf3D7_08_v3	PF3D7_0823500	inner membrane complex protein 1i, putative	-0.048119	0.007181	-0.007912	0.008245	-0.039937	-0.026373	-0.028761	0.005135	0.053842	0.00256	0.077013	0.053842
Pf3D7_08_v3	1039657	1041461	Pf3D7_08_v3	PF3D7_0823600	lipoate-protein ligase B	-0.003347	0.012843	-0.031931	-0.027648	-0.038591	0.019148	0.0052	0.025759	-0.020642	-0.000597	-0.054906	-0.020642
Pf3D7_08_v3	1043563	1046030	Pf3D7_08_v3	PF3D7_0823800	DnaJ protein, putative	-0.018999	-0.003467	-0.021409	0.038158	0.030172	0.022267	0.041669	0.059115	-0.025781	0.005338	-0.032576	-0.025781
Pf3D7_08_v3	1047301	1048757	Pf3D7_08_v3	PF3D7_0823900	dicarboxylate/tricarboxylate carrier	0.028949	-0.009302	-0.074219	0.002541	-0.006519	-0.040936	-0.077397	-0.055293	0.014729	-0.052162	-0.027515	0.014729
Pf3D7_08_v3	1049032	1051955	Pf3D7_08_v3	PF3D7_0824000	conserved Plasmodium protein, unknown function	-0.135429	-0.127762	-0.020486	-0.13802	-0.021428	-0.03066	-0.087447	-0.12059	-0.076279	-0.185743	-0.113959	-0.076279
Pf3D7_08_v3	1052521	1054241	Pf3D7_08_v3	PF3D7_0824100	exonuclease, putative	0.008934	0.039778	-0.032266	-0.059399	-0.032538	-0.06598	0.071749	0.015494	0.010438	-0.028768	-0.009554	0.010438
Pf3D7_08_v3	1054885	1059124	Pf3D7_08_v3	PF3D7_0824200	conserved Plasmodium protein, unknown function	-0.003277	0.008016	0.053556	0.061193	-0.037429	0.043537	-0.02071	-0.017604	0.078879	-0.041126	0.022922	0.078879
Pf3D7_08_v3	1059125	1061817	Pf3D7_08_v3	PF3D7_0824300	GTP-binding protein Obg2, putative	0.029897	-0.014085	-0.031558	-0.02866	-0.031279	-0.029387	-0.01986	-0.030741	-0.046085	-0.078914	-0.087985	-0.046085
Pf3D7_08_v3	1062054	1064311	Pf3D7_08_v3	PF3D7_0824400	nucleoside transporter 2	-0.089893	-0.042252	-0.002876	-0.08148	-0.082904	-0.098514	0.001746	-0.018291	-0.146969	-0.04964	-0.09875	-0.146969
Pf3D7_08_v3	1065904	1067722	Pf3D7_08_v3	PF3D7_0824500	conserved protein, unknown function	0.005638	0.022483	-0.005579	0.055781	0.040766	0.030219	0.012576	0.051697	-0.02544	-0.094134	-0.006908	-0.02544
Pf3D7_08_v3	1068313	1070152	Pf3D7_08_v3	PF3D7_0824600	Fe-S cluster assembly protein DRE2, putative	0.070321	0.018075	0.047789	0.015256	0.035643	0.00518	0.072653	0.057474	0.029698	-0.084353	0.022232	0.029698
Pf3D7_08_v3	1070738	1074667	Pf3D7_08_v3	PF3D7_0824700	lipase maturation factor, putative	0.066322	0.010302	0.079391	0.020034	0.026645	0.005617	0.07181	0.045047	0.004509	0.013685	-0.041213	0.004509
Pf3D7_08_v3	1075550	1079842	Pf3D7_08_v3	PF3D7_0824800	conserved Plasmodium membrane protein, unknown function	0.052336	0.033375	0.02052	0.059906	0.084844	0.042374	0.069671	0.024503	-0.086442	-0.153594	-0.033119	-0.086442
Pf3D7_08_v3	1079843	1083241	Pf3D7_08_v3	PF3D7_0824900	conserved Plasmodium protein, unknown function	-0.054512	0.020714	-0.03398	0.014027	-0.034668	0.03247	0.187542	0.085967	0.044762	0.030759	-0.033615	0.044762
Pf3D7_08_v3	1085798	1091498	Pf3D7_08_v3	PF3D7_0825000	conserved Plasmodium protein, unknown function	-0.004354	0.02779	0.046166	0.057671	0.028266	0.047669	0.047995	0.003834	-0.006333	-0.007894	-0.017151	-0.006333
Pf3D7_08_v3	1091748	1093455	Pf3D7_08_v3	PF3D7_0825100	ankyrin-repeat protein, putative	0.00182	0.027384	0.016892	0.027593	0.035702	0.044505	0.030817	0.060081	0.053327	0.062876	0.143188	0.053327
Pf3D7_08_v3	1093456	1094739	Pf3D7_08_v3	PF3D7_0825200	translation initiation factor IF-3	0.035623	-0.049859	-0.011266	-0.005826	0.05759	0.058024	-0.03949	0.010454	0.01993	0.001911	0.089292	0.01993
Pf3D7_08_v3	1096173	1097613	Pf3D7_08_v3	PF3D7_0825400	ATP synthase-associated protein, putative	-0.035727	-0.005445	-0.002829	-0.085772	-0.000641	-0.021922	-0.006377	0.052633	-0.022747	-0.049893	-0.035313	-0.022747
Pf3D7_08_v3	1098234	1100596	Pf3D7_08_v3	PF3D7_0825500	protein KRI1, putative	0.002779	0.052264	-7.6e-05	0.050793	0.013857	-0.016144	-0.019447	0.052504	-0.026209	-0.183902	-0.033883	-0.026209
Pf3D7_08_v3	1101637	1103054	Pf3D7_08_v3	PF3D7_0825700	crystalloid-specific PH domain-containing protein, putative	-0.009918	0.000923	0.007202	-0.066738	0.030252	0.054369	-0.025069	0.121823	0.069834	0.159792	0.085492	0.069834
Pf3D7_08_v3	1103518	1105358	Pf3D7_08_v3	PF3D7_0825800	conserved protein, unknown function	-0.129583	-0.043559	-0.00386	-0.135208	-0.010592	0.012689	0.040765	-0.006107	-0.077818	0.039865	-0.084333	-0.077818
Pf3D7_08_v3	1105798	1108211	Pf3D7_08_v3	PF3D7_0825900	conserved Plasmodium protein, unknown function	-0.055472	-0.044451	-0.080941	-0.065407	-0.066092	-0.008585	-0.005303	-0.017815	0.01722	-0.125556	-0.025542	0.01722
Pf3D7_08_v3	1109026	1113044	Pf3D7_08_v3	PF3D7_0826000	conserved Plasmodium protein, unknown function	0.064503	-0.022722	0.11812	0.044703	0.041373	0.04687	0.109368	0.008506	0.068393	0.019152	0.022228	0.068393
Pf3D7_08_v3	1113119	1139394	Pf3D7_08_v3	PF3D7_0826100	HECT-like E3 ubiquitin ligase, putative	0.098454	0.054757	0.073197	0.078619	0.091474	0.021846	0.083934	0.091393	0.165091	0.154651	0.15618	0.165091
Pf3D7_08_v3	1142249	1144557	Pf3D7_08_v3	PF3D7_0826200	alpha/beta hydrolase, putative	0.026565	-0.055569	0.084715	0.060202	0.023732	0.003552	0.043747	0.0586	-0.040203	0.013108	0.053053	-0.040203
Pf3D7_08_v3	1145917	1147754	Pf3D7_08_v3	PF3D7_0826300	SPRY domain, putative	-0.090841	-0.08006	-0.0593	-0.129217	-0.082884	-0.097728	0.023986	-0.040037	-0.059308	-0.056451	0.012235	-0.059308
Pf3D7_08_v3	1147760	1150080	Pf3D7_08_v3	PF3D7_0826400	dehydrodolichyl diphosphate synthetase, putative	-0.029961	0.00993	0.019068	0.010333	0.000161	-0.014927	0.033363	0.022235	-8.1e-05	-0.012098	0.001803	-8.1e-05
Pf3D7_08_v3	1152052	1156532	Pf3D7_08_v3	PF3D7_0826500	ubiquitin conjugation factor E4 B, putative	-0.081323	-0.019249	-0.07925	-0.028992	-0.019817	-0.034371	-0.062928	-0.035222	-0.020397	0.005646	-0.042169	-0.020397
Pf3D7_08_v3	1157071	1158401	Pf3D7_08_v3	PF3D7_0826600	SNARE protein, putative	0.046046	-0.02367	0.019457	-0.011014	-0.031328	-0.002452	-0.034351	0.103828	0.00578	0.003199	-0.011467	0.00578
Pf3D7_08_v3	1159914	1161958	Pf3D7_08_v3	PF3D7_0826700	receptor for activated c kinase	0.025073	0.083305	0.034188	-0.00798	0.004591	0.012422	0.02968	0.050008	0.003436	0.049592	0.00665	0.003436
Pf3D7_08_v3	1164405	1167392	Pf3D7_08_v3	PF3D7_0826900	conserved Plasmodium protein, unknown function	-0.05278	0.01977	0.012669	-0.054489	0.001639	0.037797	0.00111	0.014395	0.055397	0.128706	0.038128	0.055397
Pf3D7_08_v3	1167393	1171698	Pf3D7_08_v3	PF3D7_0827000	ATP-dependent RNA helicase DBP10, putative	-0.092408	0.058384	-0.012104	-0.076981	-0.089274	-0.00724	-0.102185	0.05014	0.008893	0.025512	-0.014932	0.008893
Pf3D7_08_v3	1172144	1176837	Pf3D7_08_v3	PF3D7_0827100	translation initiation factor IF-2, putative	-0.049272	0.083362	0.052494	-0.026598	0.008608	0.033908	0.104185	0.061042	0.074869	0.078884	0.105238	0.074869
Pf3D7_08_v3	1177060	1180574	Pf3D7_08_v3	PF3D7_0827200	conserved Plasmodium protein, unknown function	-0.028431	-0.040454	-0.043366	-0.100845	-0.019044	-0.128514	0.045277	-0.054086	-0.073778	-0.013832	-0.072355	-0.073778
Pf3D7_08_v3	1181045	1184046	Pf3D7_08_v3	PF3D7_0827300	conserved Plasmodium protein, unknown function	-0.008496	-0.027227	0.021813	-0.051084	0.001183	-0.007392	-0.001787	-0.017687	0.017696	0.025249	-0.00204	0.017696
Pf3D7_08_v3	1184345	1185501	Pf3D7_08_v3	PF3D7_0827400	conserved Plasmodium protein, unknown function	-0.04704	-0.022026	-0.021512	-0.086379	-0.042262	-0.028899	-0.004334	-0.008607	-0.065295	-0.046428	-0.041603	-0.065295
Pf3D7_08_v3	1185925	1187374	Pf3D7_08_v3	PF3D7_0827500	ribosomal protein L21, apicoplast, putative	0.019767	-0.051397	-0.056837	-0.059559	-0.036595	-0.07959	0.026331	0.002268	-0.057577	-0.12875	-0.07516	-0.057577
Pf3D7_08_v3	1187375	1193175	Pf3D7_08_v3	PF3D7_0827600	conserved Plasmodium protein, unknown function	-0.066675	-0.039655	-0.053583	-0.145087	-0.119958	-0.03933	0.019299	0.032344	-0.025097	0.054862	-0.069113	-0.025097
Pf3D7_08_v3	1193597	1196928	Pf3D7_08_v3	PF3D7_0827700	magnesium transporter, putative	-0.03918	0.041738	0.062449	0.07739	-0.058885	0.08632	-0.056913	0.007838	-0.001843	-0.053233	0.042888	-0.001843
Pf3D7_08_v3	1198608	1206307	Pf3D7_08_v3	PF3D7_0827800	SET domain protein, putative	-0.194713	-0.092381	-0.054941	-0.053408	-0.100577	-0.070153	-0.02126	-0.129469	-0.133948	0.066967	-0.044581	-0.133948
Pf3D7_08_v3	1206538	1208644	Pf3D7_08_v3	PF3D7_0827900	protein disulfide isomerase	0.006887	-0.07047	-0.002372	-0.060788	-0.018989	-0.071957	0.010738	-0.008233	-0.01193	-0.027322	0.001156	-0.01193
Pf3D7_08_v3	1210442	1212098	Pf3D7_08_v3	PF3D7_0828000	rhomboid protease ROM3	-0.071176	-0.000747	-0.032312	-0.01618	-0.072232	-0.127172	0.049168	-0.033237	0.039198	0.090841	0.019822	0.039198
Pf3D7_08_v3	1212099	1215880	Pf3D7_08_v3	PF3D7_0828100	conserved Plasmodium protein, unknown function	-0.003429	0.023422	0.010928	-0.023952	0.003386	-0.04806	0.005563	-0.008903	0.043238	0.058031	0.036862	0.043238
Pf3D7_08_v3	1216021	1220870	Pf3D7_08_v3	PF3D7_0828200	leucine--tRNA ligase, putative	-0.034381	-0.029247	0.06481	-0.01315	-0.034615	0.019078	0.00444	-0.014944	0.107436	-0.038517	0.068799	0.107436
Pf3D7_08_v3	1220871	1222933	Pf3D7_08_v3	PF3D7_0828300	conserved protein, unknown function	0.05863	0.06415	0.101721	0.047622	-0.047142	-0.019745	0.102464	0.017746	0.142059	0.216989	0.082516	0.142059
Pf3D7_08_v3	1223844	1226113	Pf3D7_08_v3	PF3D7_0828400	mitochondrial inner membrane protein OXA1, putative	0.023638	-0.038042	-0.014981	0.013291	-0.042069	-0.070857	-0.003444	0.008278	0.015217	-0.103905	0.027203	0.015217
Pf3D7_08_v3	1226500	1228659	Pf3D7_08_v3	PF3D7_0828500	translation initiation factor eIF-2B subunit alpha, putative	-0.013658	0.005198	0.078159	0.0397	0.017362	0.006413	-0.018361	0.017408	0.058657	0.063447	0.061142	0.058657
Pf3D7_08_v3	1229649	1232382	Pf3D7_08_v3	PF3D7_0828600	folate transporter 1	-0.017468	-0.097802	0.092129	-0.014177	-0.001701	-0.075611	-0.008888	0.036999	0.081294	0.029941	0.019301	0.081294
Pf3D7_08_v3	1233122	1236723	Pf3D7_08_v3	PF3D7_0828700	conserved protein, unknown function	0.000136	-0.03732	0.088705	-0.006839	-0.049428	-0.051563	0.039823	0.01003	0.021494	-0.074681	-0.01281	0.021494
Pf3D7_08_v3	1237035	1239751	Pf3D7_08_v3	PF3D7_0828800	GPI-anchored micronemal antigen	0.013302	-0.057837	0.047047	-0.050229	0.00811	-0.004465	0.063206	0.036899	0.093601	0.022473	-0.006969	0.093601
Pf3D7_08_v3	1241716	1243145	Pf3D7_08_v3	PF3D7_0828900	conserved protein, unknown function	0.030895	0.01218	-0.012079	-0.022325	-0.060864	-0.018457	0.035469	0.042508	0.005375	0.065531	-0.048739	0.005375
Pf3D7_08_v3	1244961	1251328	Pf3D7_08_v3	PF3D7_0829000	conserved Plasmodium membrane protein, unknown function	0.027533	0.002483	-0.069923	-0.010836	-0.03562	-0.06917	0.036198	-0.007365	-0.011621	-0.143591	0.009017	-0.011621
Pf3D7_08_v3	1252099	1254046	Pf3D7_08_v3	PF3D7_0829100	coiled-coil domain-containing protein 124, putative	-0.043834	-0.075641	2.7e-05	0.006134	-0.01621	0.000481	-0.030263	-0.025318	0.021959	-0.008597	0.011823	0.021959
Pf3D7_08_v3	1254308	1255626	Pf3D7_08_v3	PF3D7_0829200	prohibitin 1, putative	-0.005173	-0.004203	-0.038276	0.018797	-0.01721	-0.057892	-0.044197	-0.052915	-0.040725	-0.021026	-0.031396	-0.040725
Pf3D7_08_v3	1256305	1257383	Pf3D7_08_v3	PF3D7_0829300	U6 snRNA-associated Sm-like protein LSm8, putative	0.017498	-0.012971	-0.055335	-0.046867	-0.003596	-0.05025	-0.006086	-0.037812	-0.010433	-0.053983	-0.025912	-0.010433
Pf3D7_08_v3	1257466	1259291	Pf3D7_08_v3	PF3D7_0829400	prolyl 4-hydroxylase subunit alpha, putative	0.011144	0.004431	0.10139	0.035125	-0.046869	-0.058112	0.091216	-0.017028	0.038956	0.147739	0.092885	0.038956
Pf3D7_08_v3	1259798	1266948	Pf3D7_08_v3	PF3D7_0829500	conserved Plasmodium protein, unknown function	-0.123175	-0.164015	-0.039932	-0.130731	-0.128745	-0.100993	-0.118973	-0.136108	-0.049365	-0.084952	-0.099005	-0.049365
Pf3D7_08_v3	1268885	1269897	Pf3D7_08_v3	PF3D7_0829600	early transcribed membrane protein 8	0.056069	0.000991	-0.008913	-0.058336	-0.03546	-0.080296	-0.071213	0.003596	-0.019308	0.069072	-0.072183	-0.019308
[truncated: 3,150 more rows]
