# Supplementary material for: Diverse evolutionary pathways challenge the use of collateral sensitivity as a strategy to suppress resistance
Source: eLife. 2023 Sep 22;12:e85023. doi: 10.7554/eLife.85023 (PMC10695565; doi:10.7554/eLife.85023)
Supplement: Table 2—source data 3. — Each entry represents a single clonal mutation that is present in the drug-selected clone but not in the matched parent line (i.e. arose during the drug selection process). [file elife-85023-table2-data3.xlsx]

## Sheet: Sheet1
Table 2- Source Data 3: Homozygous variants identified from in vitro selections by whole-genome sequencing. Each entry represents a single clonal mutation that is present in the drug-selected clone but not in the matched parent line (i.e. arose during the drug selection process).
Sample Name	Parent Line	Chromosome	Position	Gene_Name	Gene_Description	Quality	Ref_Base	Alt_Base	Type	Effect	Impact	Codon_Change	Amino_Acid_Change
TCMDC125334-C276Y-T-F1-C1	DHODH C276Y Parent	Pf3D7_11_v3	1298179	PF3D7_1133500	conserved Plasmodium protein, unknown function	2011.15	C	T	SNP	missense_variant	MISSENSE	Cgt/Tgt	p.Arg387Cys/c.1159C>T
TCMDC125334-C276Y-T-F1-C1	DHODH C276Y Parent	Pf3D7_04_v3	1200329			671.7	GT	G	INDEL	intergenic_region
TCMDC125334-C276Y-T-F1-C1	DHODH C276Y Parent	Pf3D7_11_v3	2037413			27439.3	CAGGGTTCAGGGTTT	C	INDEL	intergenic_region
TCMDC125334-C276Y-T-F1-C1	DHODH C276Y Parent	Pf3D7_11_v3	2037497			7747.11	AT	A	INDEL	intergenic_region
TCMDC125334-C276Y-T-F1-C1	DHODH C276Y Parent	Pf3D7_13_v3	2923668			766.09	CAGGTTT	C	INDEL	intergenic_region
TCMDC125334-C276Y-T-F1-C1	DHODH C276Y Parent	Pf3D7_14_v3	3165362			4653.11	T	TTTTA	INDEL	intergenic_region			n.3165362_3165363insTTTA
TCMDC125334-C276Y-T-F1-C2	DHODH C276Y Parent	Pf3D7_03_v3	30870			17191.2	A	T	SNP	intergenic_region			n.30870A>T
TCMDC125334-C276Y-T-F1-C2	DHODH C276Y Parent	Pf3D7_03_v3	30871			17410.2	A	G	SNP	intergenic_region			n.30871A>G
TCMDC125334-C276Y-T-F1-C2	DHODH C276Y Parent	Pf3D7_03_v3	30874			18451.2	C	T	SNP	intergenic_region			n.30874C>T
TCMDC125334-C276Y-T-F1-C2	DHODH C276Y Parent	Pf3D7_03_v3	30876			18408.2	C	T	SNP	intergenic_region			n.30876C>T
TCMDC125334-C276Y-T-F1-C2	DHODH C276Y Parent	Pf3D7_03_v3	30878			18532.2	T	A	SNP	intergenic_region			n.30878T>A
TCMDC125334-C276Y-T-F1-C2	DHODH C276Y Parent	Pf3D7_03_v3	30881			18505.2	C	T	SNP	intergenic_region			n.30881C>T
TCMDC125334-C276Y-T-F1-C2	DHODH C276Y Parent	Pf3D7_03_v3	30887			19474.2	C	G	SNP	intergenic_region			n.30887C>G
TCMDC125334-C276Y-T-F1-C2	DHODH C276Y Parent	Pf3D7_03_v3	31162			1755.15	T	A	SNP	intergenic_region			n.31162T>A
TCMDC125334-C276Y-T-F1-C2	DHODH C276Y Parent	Pf3D7_03_v3	31165			1578.15	A	G	SNP	intergenic_region			n.31165A>G
TCMDC125334-C276Y-T-F1-C2	DHODH C276Y Parent	Pf3D7_01_v3	304525	PF3D7_0107500	Niemann-Pick type C1-related protein	5682.11	TATTTAC	T	INDEL	intron_variant			c.4338+73_4338+78delGTAAAT
TCMDC125334-C276Y-T-F1-C2	DHODH C276Y Parent	Pf3D7_03_v3	31172			714.11	TTAAC	T	INDEL	intergenic_region			n.31173_31176delTAAC
TCMDC125334-C276Y-T-F1-C2	DHODH C276Y Parent	Pf3D7_09_v3	421040	PF3D7_0909300	apoptosis-related protein (ARP)	622.11	ATATT	A	INDEL	intron_variant			c.231+56_231+59delAATA
TCMDC125334-C276Y-T-F1-C2	DHODH C276Y Parent	Pf3D7_11_v3	2037413			27439.3	CAGGGTTCAGGGTTT	C	INDEL	intergenic_region
TCMDC125334-C276Y-T-F1-C2	DHODH C276Y Parent	Pf3D7_11_v3	2037497			7747.11	AT	A	INDEL	intergenic_region
TCMDC125334-C276Y-T-F1-C2	DHODH C276Y Parent	Pf3D7_12_v3	1976752			6043.04	A	AAAAAG	INDEL	intergenic_region			n.1976752_1976753insAAAAG
TCMDC125334-C276Y-T-F1-C2	DHODH C276Y Parent	Pf3D7_14_v3	3165362			4653.11	T	TTTTA	INDEL	intergenic_region			n.3165362_3165363insTTTA
TCMDC125334-C276Y-T-F1-C3	DHODH C276Y Parent	Pf3D7_06_v3	1289145	PF3D7_0630800	TPH domain-containing protein, putative	3316.15	G	T	SNP	intron_variant			c.321-13G>T
TCMDC125334-C276Y-T-F1-C3	DHODH C276Y Parent	Pf3D7_06_v3	1295676	PF3D7_0631000	Tetratricopeptide repeat protein, putative	2545.15	A	G	SNP	missense_variant	MISSENSE	aAa/aGa	p.Lys68Arg/c.203A>G
TCMDC125334-C276Y-T-F1-C3	DHODH C276Y Parent	Pf3D7_09_v3	899950	PF3D7_0922100	ubiquitin-like protein, putative	603.52	CAT	C,CATAT	INDEL	intron_variant			c.4320+45_4321-44delAT
TCMDC125334-C276Y-T-F1-C3	DHODH C276Y Parent	Pf3D7_11_v3	84013			3664.11	T	TAAGA	INDEL	intergenic_region			n.84013_84014insAAGA
TCMDC125334-C276Y-T-F1-C3	DHODH C276Y Parent	Pf3D7_11_v3	2037413			27439.3	CAGGGTTCAGGGTTT	C	INDEL	intergenic_region
TCMDC125334-C276Y-T-F1-C3	DHODH C276Y Parent	Pf3D7_11_v3	2037497			7747.11	AT	A	INDEL	intergenic_region
TCMDC125334-C276Y-T-F1-C3	DHODH C276Y Parent	Pf3D7_12_v3	1976752			6043.04	A	AAAAAG	INDEL	intergenic_region			n.1976752_1976753insAAAAG
TCMDC125334-C276Y-T-F1-C3	DHODH C276Y Parent	Pf3D7_14_v3	3165362			4653.11	T	TTTTA	INDEL	intergenic_region			n.3165362_3165363insTTTA
TCMDC125334-C276Y-T-F1-C4	DHODH C276Y Parent	Pf3D7_11_v3	2037413			27439.3	CAGGGTTCAGGGTTT	C	INDEL	intergenic_region
TCMDC125334-C276Y-T-F1-C4	DHODH C276Y Parent	Pf3D7_11_v3	2037497			7747.11	AT	A	INDEL	intergenic_region
TCMDC125334-C276Y-T-F1-C4	DHODH C276Y Parent	Pf3D7_11_v3	2037570			1086.95	GT	G	INDEL	intergenic_region
TCMDC125334-C276Y-T-F1-C4	DHODH C276Y Parent	Pf3D7_12_v3	1976752			6043.04	A	AAAAAG	INDEL	intergenic_region			n.1976752_1976753insAAAAG
TCMDC125334-C276Y-T-F1-C4	DHODH C276Y Parent	Pf3D7_14_v3	3165362			4653.11	T	TTTTA	INDEL	intergenic_region			n.3165362_3165363insTTTA
TCMDC125334-C276Y-T-F2-C1	DHODH C276Y Parent	Pf3D7_03_v3	1063569			3758.01	C	T	SNP	intergenic_region
TCMDC125334-C276Y-T-F2-C1	DHODH C276Y Parent	Pf3D7_03_v3	1063554			7870.99	TC	T	INDEL	intergenic_region
TCMDC125334-C276Y-T-F2-C1	DHODH C276Y Parent	Pf3D7_08_v3	574953			1489.07	G	GGAAAAA	INDEL	intergenic_region			n.574953_574954insGAAAAA
TCMDC125334-C276Y-T-F2-C2	DHODH C276Y Parent	Pf3D7_11_v3	2037570			1295.93	GT	G	INDEL	intergenic_region
TCMDC125334-C276Y-T-F2-C2	DHODH C276Y Parent	Pf3D7_14_v3	3165362			1903.97	T	TTTTA	INDEL	intergenic_region			n.3165362_3165363insTTTA
TCMDC125334-C276Y-T-F2-C3	DHODH C276Y Parent	Pf3D7_13_v3	1449105	PF3D7_1335400	reticulocyte binding protein 2 homologue a (RH2a)	4358.74	A	C	SNP	missense_variant	MISSENSE	Aaa/Caa	p.Lys2705Gln/c.8113A>C
TCMDC125334-C276Y-T-F2-C3	DHODH C276Y Parent	Pf3D7_10_v3	1082469	PF3D7_1025500	conserved Plasmodium protein, unknown function	11882.7	CCACCATTTTGGTGTGTCCCACCATTTTGGTGTGTCT	C	INDEL	disruptive_inframe_deletion		gagacacaccaaaatggtgggacacaccaaaatggtggg/ggg	p.Glu1431_Gly1442del/c.4292_4327delAGACACACCAAAATGGTGGGACACACCAAAATGGTG
TCMDC125334-C276Y-T-F2-C3	DHODH C276Y Parent	Pf3D7_14_v3	3165362			1903.97	T	TTTTA	INDEL	intergenic_region			n.3165362_3165363insTTTA
TCMDC125334-C276Y-T-F2-C4	DHODH C276Y Parent	Pf3D7_08_v3	574953			1489.07	G	GGAAAAA	INDEL	intergenic_region			n.574953_574954insGAAAAA
TCMDC125334-C276Y-T-F3-C1	DHODH C276Y Parent	Pf3D7_06_v3	131359	PF3D7_0603300	dihydroorotate dehydrogenase, mitochondrial precursor (DHODH)	56468.9	A	T	SNP	missense_variant	MISSENSE	tTt/tAt	p.Phe227Tyr/c.680T>A
TCMDC125334-C276Y-T-F3-C1	DHODH C276Y Parent	Pf3D7_11_v3	246396			2529.86	TA	T	INDEL	intergenic_region			n.246397delA
TCMDC125334-C276Y-T-F3-C1	DHODH C276Y Parent	Pf3D7_12_v3	311510	PF3D7_1206900	conserved Plasmodium protein, unknown function	550.06	GA	G	INDEL	intron_variant			c.381+22delA
TCMDC125334-C276Y-T-F3-C1	DHODH C276Y Parent	Pf3D7_12_v3	1709660	PF3D7_1240400	erythrocyte membrane protein 1, PfEMP1 (VAR)	27931.8	ACACCAG	A	INDEL	disruptive_inframe_deletion		ccagcacct/cct	p.Ala1739_Pro1740del/c.5214_5219delAGCACC
TCMDC125334-C276Y-T-F3-C2	DHODH C276Y Parent	Pf3D7_06_v3	131359	PF3D7_0603300	dihydroorotate dehydrogenase, mitochondrial precursor (DHODH)	56468.9	A	T	SNP	missense_variant	MISSENSE	tTt/tAt	p.Phe227Tyr/c.680T>A
TCMDC125334-C276Y-T-F3-C2	DHODH C276Y Parent	Pf3D7_11_v3	246396			2529.86	TA	T	INDEL	intergenic_region			n.246397delA
TCMDC125334-C276Y-T-F3-C2	DHODH C276Y Parent	Pf3D7_12_v3	1709660	PF3D7_1240400	erythrocyte membrane protein 1, PfEMP1 (VAR)	27931.8	ACACCAG	A	INDEL	disruptive_inframe_deletion		ccagcacct/cct	p.Ala1739_Pro1740del/c.5214_5219delAGCACC
TCMDC125334-C276Y-T-F3-C3	DHODH C276Y Parent	Pf3D7_06_v3	131359	PF3D7_0603300	dihydroorotate dehydrogenase, mitochondrial precursor (DHODH)	56468.9	A	T	SNP	missense_variant	MISSENSE	tTt/tAt	p.Phe227Tyr/c.680T>A
TCMDC125334-C276Y-T-F3-C3	DHODH C276Y Parent	Pf3D7_07_v3	1445109			3649.97	T	C	SNP	intergenic_region
TCMDC125334-C276Y-T-F3-C3	DHODH C276Y Parent	Pf3D7_09_v3	1528534			27052.9	C	A	SNP	intergenic_region
TCMDC125334-C276Y-T-F3-C3	DHODH C276Y Parent	Pf3D7_07_v3	1445105			3629.26	GT	G	INDEL	intergenic_region
TCMDC125334-C276Y-T-F3-C3	DHODH C276Y Parent	Pf3D7_11_v3	246396			2529.86	TA	T	INDEL	intergenic_region			n.246397delA
TCMDC125334-C276Y-T-F3-C3	DHODH C276Y Parent	Pf3D7_12_v3	1709660	PF3D7_1240400	erythrocyte membrane protein 1, PfEMP1 (VAR)	27931.8	ACACCAG	A	INDEL	disruptive_inframe_deletion		ccagcacct/cct	p.Ala1739_Pro1740del/c.5214_5219delAGCACC
TCMDC125334-C276Y-T-F3-C3	DHODH C276Y Parent	Pf3D7_13_v3	513			777.62	CCCTAAACCCT	C	INDEL	intergenic_region			n.514_523delCCTAAACCCT
