# Supplementary material for: Diverse evolutionary pathways challenge the use of collateral sensitivity as a strategy to suppress resistance
Source: eLife. 2023 Sep 22;12:e85023. doi: 10.7554/eLife.85023 (PMC10695565; doi:10.7554/eLife.85023)
Supplement: Table 3—source data 1. [file elife-85023-table3-data1.xlsx]

## Sheet: Sheet2
Table 3- Source Data 1. Individual bioreplicates of EC50 values (nM) obtained from dose response assays.
Clone	Biorep Number	TCMDC-125334	DSM265	IDI6273	Gen669178	Dihydroartemisinin	Atovaquone
3D7 A10	Biorep 1	73.7	3.27	216	3.04	2.58	0.34
	Biorep 2	92.3	3.41	356	4.78	4.85	0.609
	Biorep 3	118	3.5	391	5.32	3.88	0.388
	Biorep 4	184	7.09	790	10	1.69	0.792
	Biorep 5	206	5.4	704	10.1	4.68	0.774
	Biorep 6	98.6	3.23	376	6.81	2.81	0.35
	Biorep 7	107	3.13	387	6.19	3.42	0.434
	Biorep 8	128	3.67	466	7.26	3.46	0.469
	Biorep 9	159	6.25	991	10.5	4.87	0.891
	Biorep 10	111	N/A	521	5.38	4.47	0.537
	Biorep 11	110	3.13	430	7.68	3.33	0.412
	Biorep 12	89.5	2.4	413	6.42	3.29	0.329
	Biorep 13	114	3.73	484	5.68	3.6	0.47
	Biorep 14	163	N/A			2.34	0.508
	Biorep 15	187	6.71			4.04	0.735
	Biorep 16	145	4.1			2.81	0.206
	Biorep 17	191	6.27			2.53	0.304
	Biorep 18	199	4.27			2.94	0.389
	Biorep 19	186	6.82			3.75	0.512
DHODH C276Y Parent	Biorep 2	10.6	43.2	68	25.1	2.96	0.511
	Biorep 3	N/A	47	39.9	32.4	1.49	0.393
	Biorep 4	N/A	40.3	38	22.3	1.66	0.421
	Biorep 5	N/A	60	46	27.3	1.52	0.484
	Biorep 6	8.91	N/A	29.6	15.7	2.73	0.525
	Biorep 7	9.33	N/A	37.3	15.2	2.15	0.473
	Biorep 8	8.92	N/A	33	16	3.52	0.417
	Biorep 9	13.8				1.91	0.312
	Biorep 10	15.2	82.6			3.48	0.292
	Biorep 11	11.5	70.8			2.61	0.22
	Biorep 12	17.2	92.5			2.72	0.319
	Biorep 13	12.2	52			2.52	0.342
	Biorep 14	16.3	86.4			3.32	0.498
C276Y-D-T-F3-C1	Biorep 1	81.7	>100	198	41.2	1.92	0.204
	Biorep 2	56.6	N/A	122	74.1	2.46	0.135
	Biorep 3	36.8	> 499	123	69.3	2.78	0.204
	Biorep 4	57.8	7703	188	80	1.55	0.209
	Biorep 5	50.6	7400	150	79.3	1.62	0.25
	Biorep 6	62.9	8300	199	74.3	1.41	0.373
	Biorep 7	68.4	10200			2.36	0.121
	Biorep 8	122	15300			3.62	0.225
	Biorep 9	57.2	6450			2.56	0.19
	Biorep 10	62.1	7940			4.27	0.215
DHODH F227Y*	Biorep 1	395	965	2000	21.2	1.62	0.254
	Biorep 2	420	1030	2410	16.4	1.68	0.28
	Biorep 3	599	1520	3500	26.7	2.05	0.353
