# Supplementary material for: Diverse evolutionary pathways challenge the use of collateral sensitivity as a strategy to suppress resistance
Source: eLife. 2023 Sep 22;12:e85023. doi: 10.7554/eLife.85023 (PMC10695565; doi:10.7554/eLife.85023)
Supplement: Table 4—source data 1. [file elife-85023-table4-data1.xlsx]

## Sheet: Sheet1
Table 4- Source Data 1. Individual bioreplicates of EC50 values (nM) obtained from dose response assays.
Clone	Biorep Number	TCMDC-125334	DSM265	IDI6273	Gen669178	Dihydroartemisinin	Atovaquone
3D7 A10	Biorep 1	73.7	3.27	216	3.04	2.58	0.34
	Biorep 2	92.3	3.41	356	4.78	4.85	0.609
	Biorep 3	118	3.5	391	5.32	3.88	0.388
	Biorep 4	184	7.09	790	10	1.69	0.792
	Biorep 5	206	5.4	704	10.1	4.68	0.774
	Biorep 6	98.6	3.23	376	6.81	2.81	0.35
	Biorep 7	107	3.13	387	6.19	3.42	0.434
	Biorep 8	128	3.67	466	7.26	3.46	0.469
	Biorep 9	159	6.25	991	10.5	4.87	0.891
	Biorep 10	111	N/A	521	5.38	4.47	0.537
	Biorep 11	110	3.13	430	7.68	3.33	0.412
	Biorep 12	89.5	2.4	413	6.42	3.29	0.329
	Biorep 13	114	3.73	484	5.68	3.6	0.47
	Biorep 14	163	N/A			2.34	0.508
	Biorep 15	187	6.71			4.04	0.735
	Biorep 16	145	4.1			2.81	0.206
	Biorep 17	191	6.27			2.53	0.304
	Biorep 18	199	4.27			2.94	0.389
	Biorep 19	186	6.82			3.75	0.512
DT-F1-C1	Biorep 1	280	6.92	876	11.8	3.13	0.638
	Biorep 2	172	10.1	1400	17.1	3.55	0.786
	Biorep 3	327	8.75	1290	18.7	12.4	0.716
DT-F1-C2	Biorep 1	130	7.09	502	6.32	9.36	0.722
	Biorep 2	158	5.48	651	8.4	4.01	0.767
	Biorep 3	171	5.69	732	8.49	2.97	0.619
DT-F1-C3	Biorep 1	119	7.6	496	6.79	3.59	0.417
	Biorep 2	211	7.46	1050	12.1	5.77	0.705
	Biorep 3	242	7.48	1140	14	3.07	0.584
DT-F1-C4	Biorep 1	376	13	1960	26.3	3.53	0.661
	Biorep 2	163	6.13	896	10.1	1.92	0.303
	Biorep 3	418	14.6	2090	22	8.75	0.736
DT-F2-C1	Biorep 1	646	75.9	1420	12.9	3.61	0.568
	Biorep 2	813	99.6	1620	13.5	6.97	0.745
	Biorep 3	524	62.1	907	7.89	11.8	0.403
DT-F2-C2	Biorep 1	563	109	873	8.56	7.9	0.627
	Biorep 2	473	71.3	701	6.41	4.33	0.379
	Biorep 3	571	67	1070	11.1	3.07	0.503
DT-F2-C3	Biorep 1	526	79.4	972	9.15	4.56	0.607
	Biorep 2	553	65.2	1010	9.17	3.11	0.444
	Biorep 3	1370	135	2150	20.1	6.47	0.942
DT-F2-C4	Biorep 1	494	83.6	873	8.17	4.74	0.59
	Biorep 2	721	84.9	1440	12.3	5.84	0.629
	Biorep 3	812	114	1670	15.5	3.66	0.668
DT-F2-C5	Biorep 1	407	57	731	8.31	2.47	0.356
	Biorep 2	689	89.8	1410	10.8	7.82	0.456
	Biorep 3	573	73.5	947	8.27	8.86	0.413
DT-F2-C6	Biorep 1	585	65.1	1110	17.7	3.06	0.425
	Biorep 2	807	115	1780	15.7	9.13	0.578
	Biorep 3	629	82.8	1030	9.71	7.57	0.475
