# Supplementary material for: Diverse evolutionary pathways challenge the use of collateral sensitivity as a strategy to suppress resistance
Source: eLife. 2023 Sep 22;12:e85023. doi: 10.7554/eLife.85023 (PMC10695565; doi:10.7554/eLife.85023)
Supplement: Table 4—source data 2. — Denoised log2 copy ratios were calculated across the genic intervals of the full genome for all sequenced samples. Values were calculated using the GATK4.0 CNV detection pipeline. [file elife-85023-table4-data2.xlsx]

## Sheet: Sheet1
Table 4- Source Data 2. Copy number variation analysis based on whole-genome sequencing. Denoised log2 copy ratios were calculated across the genic intervals of the full genome for all sequenced samples. Values were calculated using the GATK4.0 CNV detection pipeline.
Chromosome	Contig_Start	Contig_End	Chromosome	Gene_ID	Gene_Description	3D7 Parent	TCMDC125334-DT-F1-C1	TCMDC125334-DT-F1-C3	TCMDC125334-DT-F2-C1	TCMDC125334-DT-F2-C2
Pf3D7_01_v3	29260	37376	Pf3D7_01_v3	PF3D7_0100100	erythrocyte membrane protein 1, PfEMP1	0.078398	0.086534	0.086971	0.177681	0.16022
Pf3D7_01_v3	42117	46757	Pf3D7_01_v3	PF3D7_0100300	erythrocyte membrane protein 1, PfEMP1	-0.024392	0.008854	0.041562	0.151647	0.166504
Pf3D7_01_v3	50113	51886	Pf3D7_01_v3	PF3D7_0100400	rifin	-0.127601	-0.048964	-0.019392	0.3688	0.132595
Pf3D7_01_v3	53530	55256	Pf3D7_01_v3	PF3D7_0100600	rifin	-0.085007	-0.005635	0.008196	0.080676	-0.03173
Pf3D7_01_v3	59522	61253	Pf3D7_01_v3	PF3D7_0100800	rifin	-0.112347	-0.046261	-0.046762	0.059264	-0.04859
Pf3D7_01_v3	61937	63650	Pf3D7_01_v3	PF3D7_0100900	rifin	-0.0975	-0.051717	-0.054041	0.120248	0.11776
Pf3D7_01_v3	81515	83356	Pf3D7_01_v3	PF3D7_0101600	rifin	0.031158	-0.074857	-0.025713	0.258156	0.163456
Pf3D7_01_v3	89992	91670	Pf3D7_01_v3	PF3D7_0101900	rifin	-0.093032	-0.038737	-0.049735	0.152891	0.117595
Pf3D7_01_v3	92863	94125	Pf3D7_01_v3	PF3D7_0102000	Plasmodium exported protein (PHISTa), unknown function, pseudogene	-0.089105	-0.031837	-0.001836	0.175292	0.073617
Pf3D7_01_v3	94800	96149	Pf3D7_01_v3	PF3D7_0102100	stevor, pseudogene	-0.1357	-0.11277	-0.069546	0.173417	0.035264
Pf3D7_01_v3	98569	102532	Pf3D7_01_v3	PF3D7_0102200	ring-infected erythrocyte surface antigen	-0.049496	-0.059346	-0.005725	0.133416	0.123703
Pf3D7_01_v3	104454	105459	Pf3D7_01_v3	PF3D7_0102300	Plasmodium exported protein, unknown function	-0.011252	-0.018639	0.005167	0.078806	-0.020008
Pf3D7_01_v3	106947	108598	Pf3D7_01_v3	PF3D7_0102400	lysophospholipase, putative, pseudogene	-0.12054	-0.069993	-0.066747	0.107493	-0.054242
Pf3D7_01_v3	110500	116049	Pf3D7_01_v3	PF3D7_0102500	erythrocyte binding antigen-181	-0.029706	-0.017379	0.0134	0.177888	0.103028
Pf3D7_01_v3	118791	121499	Pf3D7_01_v3	PF3D7_0102600	serine/threonine protein kinase, FIKK family	-0.202286	-0.212583	-0.142934	-0.198528	-0.15062
Pf3D7_01_v3	124267	125734	Pf3D7_01_v3	PF3D7_0102700	merozoite-associated tryptophan-rich antigen	-0.099859	0.042424	0.056114	-0.073677	0.008798
Pf3D7_01_v3	126068	128391	Pf3D7_01_v3	PF3D7_0102800	seipin domain-containing protein, putative	-0.024581	0.034218	0.046398	0.189823	0.139763
Pf3D7_01_v3	128710	131090	Pf3D7_01_v3	PF3D7_0102900	aspartate--tRNA ligase	-0.05182	0.004108	0.031154	0.028749	0.061393
Pf3D7_01_v3	131836	133874	Pf3D7_01_v3	PF3D7_0103000	vacuolar protein sorting-associated protein VTA1, putative	-0.135759	0.094409	0.018714	0.173163	0.200873
Pf3D7_01_v3	134103	139507	Pf3D7_01_v3	PF3D7_0103100	vacuolar protein sorting-associated protein 51, putative	-0.236236	-0.125091	-0.198926	-0.148951	-0.079004
Pf3D7_01_v3	140412	142469	Pf3D7_01_v3	PF3D7_0103200	nucleoside transporter 4	-0.106987	0.006338	0.006114	0.115942	0.029417
Pf3D7_01_v3	143390	146646	Pf3D7_01_v3	PF3D7_0103300	conserved protein, unknown function	-0.100533	-0.042638	-0.041061	-0.004925	0.092718
Pf3D7_01_v3	147665	153027	Pf3D7_01_v3	PF3D7_0103400	zinc-carboxypeptidase, putative	-0.088565	-0.066138	-0.052551	0.135432	0.067773
Pf3D7_01_v3	153926	160676	Pf3D7_01_v3	PF3D7_0103500	conserved Plasmodium protein, unknown function	-0.214934	-0.056619	-0.099842	0.056949	-0.026995
Pf3D7_01_v3	160881	166371	Pf3D7_01_v3	PF3D7_0103600	ATP-dependent RNA helicase, putative	-0.114332	-0.095303	-0.10752	0.106888	-0.032878
Pf3D7_01_v3	166372	168883	Pf3D7_01_v3	PF3D7_0103700	L-seryl-tRNA(Sec) kinase, putative	0.088377	-0.005096	-0.055865	0.082257	0.021928
Pf3D7_01_v3	168884	171523	Pf3D7_01_v3	PF3D7_0103800	actin-related protein	0.001938	-0.056158	-0.110881	0.043071	-0.010785
Pf3D7_01_v3	172614	174841	Pf3D7_01_v3	PF3D7_0103900	parasite-infected erythrocyte surface protein	-0.058032	0.010533	-0.056168	-0.092221	-0.042005
Pf3D7_01_v3	175359	176626	Pf3D7_01_v3	PF3D7_0104000	thrombospondin-related sporozoite protein	-0.075824	-0.033138	-0.088835	0.024569	0.004959
Pf3D7_01_v3	177837	181040	Pf3D7_01_v3	PF3D7_0104100	conserved Plasmodium membrane protein, unknown function	0.027036	0.103233	0.036862	0.055159	0.032206
Pf3D7_01_v3	182572	184472	Pf3D7_01_v3	PF3D7_0104200	StAR-related lipid transfer protein	-0.066699	-0.052028	-0.0881	-0.126036	-0.088462
Pf3D7_01_v3	190019	201480	Pf3D7_01_v3	PF3D7_0104300	ubiquitin carboxyl-terminal hydrolase 1, putative	0.018912	0.02322	0.005341	0.211058	0.10935
Pf3D7_01_v3	202286	204382	Pf3D7_01_v3	PF3D7_0104400	4-hydroxy-3-methylbut-2-enyl diphosphate reductase	-0.03964	-0.025355	-0.081044	-0.172848	-0.066401
Pf3D7_01_v3	204383	205705	Pf3D7_01_v3	PF3D7_0104500	conserved protein, unknown function	0.109345	0.030558	0.051378	-0.118232	-0.01825
Pf3D7_01_v3	205920	210439	Pf3D7_01_v3	PF3D7_0104600	conserved Plasmodium protein, unknown function	-0.049952	-0.081698	-0.088149	0.065458	-0.007948
Pf3D7_01_v3	210620	213255	Pf3D7_01_v3	PF3D7_0104700	major facilitator superfamily-related transporter, putative	0.129984	0.036624	-0.003447	0.253065	0.148363
Pf3D7_01_v3	215526	217759	Pf3D7_01_v3	PF3D7_0104800	novel putative transporter 1, putative	-0.057118	-0.099757	-0.039094	-0.00676	0.000534
Pf3D7_01_v3	220952	221883	Pf3D7_01_v3	PF3D7_0105100	conserved Apicomplexan protein, unknown function	-0.051316	-0.141039	-0.150034	-0.026215	-0.004289
Pf3D7_01_v3	222004	224210	Pf3D7_01_v3	PF3D7_0105200	heptatricopeptide repeat and RAP domain-containing protein, putative	-0.036103	-0.040264	-0.015699	0.187905	0.080064
Pf3D7_01_v3	224860	226029	Pf3D7_01_v3	PF3D7_0105300	cyclase-associated protein	0.054659	0.00093	-0.030895	0.088656	0.034919
Pf3D7_01_v3	226431	227535	Pf3D7_01_v3	PF3D7_0105400	conserved Plasmodium protein, unknown function	-0.026298	0.157378	0.022023	0.182223	0.094391
Pf3D7_01_v3	228235	229769	Pf3D7_01_v3	PF3D7_0105500	conserved protein, unknown function	-0.0401	-0.029102	-0.028724	0.109723	0.039322
Pf3D7_01_v3	230039	234652	Pf3D7_01_v3	PF3D7_0105600	conserved Plasmodium protein, unknown function	-0.079151	0.026293	-0.025903	0.051405	-0.025117
Pf3D7_01_v3	238416	248107	Pf3D7_01_v3	PF3D7_0105700	asparagine-rich antigen Pfa35-2	0.011787	-0.019174	-0.037305	-0.003339	-0.093403
Pf3D7_01_v3	248981	252260	Pf3D7_01_v3	PF3D7_0105800	cyclin-dependent kinases regulatory subunit, putative	0.01587	-0.00707	0.038866	-0.013964	-0.028482
Pf3D7_01_v3	253334	255180	Pf3D7_01_v3	PF3D7_0105900	3'-5' exonuclease, putative	-0.027545	-0.003933	-0.027961	0.103875	0.081358
Pf3D7_01_v3	255525	258793	Pf3D7_01_v3	PF3D7_0106000	conserved protein, unknown function	0.027813	-0.02083	-0.031742	0.109323	0.031428
Pf3D7_01_v3	260408	262059	Pf3D7_01_v3	PF3D7_0106100	V-type proton ATPase subunit C, putative	-0.041245	-0.028522	-0.044538	-0.002259	-0.000507
Pf3D7_01_v3	263090	264473	Pf3D7_01_v3	PF3D7_0106200	EF hand domain-containing protein, putative	-0.109028	0.010519	-0.014001	-0.016032	-0.000171
Pf3D7_01_v3	264958	269423	Pf3D7_01_v3	PF3D7_0106300	calcium-transporting ATPase	-0.030242	0.042228	-0.044074	-0.068688	-0.058594
Pf3D7_01_v3	272204	273654	Pf3D7_01_v3	PF3D7_0106400	pre-rRNA-processing protein TSR2, putative	-0.129401	-0.027476	0.02617	0.03685	-0.130465
Pf3D7_01_v3	274065	278800	Pf3D7_01_v3	PF3D7_0106500	conserved Plasmodium protein, unknown function	-0.141576	-0.040301	-0.100178	0.137194	0.033681
Pf3D7_01_v3	278865	280264	Pf3D7_01_v3	PF3D7_0106600	conserved Plasmodium protein, unknown function	-0.070096	0.018625	-0.010098	0.079391	0.007313
Pf3D7_01_v3	280905	285709	Pf3D7_01_v3	PF3D7_0106700	small ribosomal subunit assembling AARP2 protein	-0.027518	0.004737	-0.045907	0.512129	0.234651
Pf3D7_01_v3	286701	289168	Pf3D7_01_v3	PF3D7_0106800	ras-related protein Rab-5C	-0.113877	-0.023578	-0.024895	0.025187	-0.084336
Pf3D7_01_v3	290136	292840	Pf3D7_01_v3	PF3D7_0106900	2-C-methyl-D-erythritol 4-phosphate cytidylyltransferase, putative	0.143432	0.009417	0.111251	0.45894	0.239441
Pf3D7_01_v3	293392	295134	Pf3D7_01_v3	PF3D7_0107000	centrin-1	-0.124871	-0.066302	0.0006	-0.004217	-0.033502
Pf3D7_01_v3	295135	297146	Pf3D7_01_v3	PF3D7_0107100	conserved protein, unknown function	0.001743	0.020132	0.013731	0.106699	-0.016421
Pf3D7_01_v3	297147	299479	Pf3D7_01_v3	PF3D7_0107200	CCR4 domain-containing protein 3, putative	-0.06529	-0.036872	-0.028603	-0.054555	-0.166066
Pf3D7_01_v3	299480	301118	Pf3D7_01_v3	PF3D7_0107300	conserved Plasmodium protein, unknown function	0.061206	0.166856	0.060707	0.157853	0.123329
Pf3D7_01_v3	302687	303648	Pf3D7_01_v3	PF3D7_0107400	ATP synthase-associated protein, putative	-0.041723	0.066128	-0.008549	-0.145822	-0.015958
Pf3D7_01_v3	304112	309507	Pf3D7_01_v3	PF3D7_0107500	Niemann-Pick type C1-related protein	-0.031219	-0.028381	-0.039591	-0.090392	-0.084886
Pf3D7_01_v3	314368	319655	Pf3D7_01_v3	PF3D7_0107600	eukaryotic translation initiation factor 2-alpha kinase 2, putative	-0.057606	0.031961	-0.005219	0.141971	0.078411
Pf3D7_01_v3	319918	321758	Pf3D7_01_v3	PF3D7_0107700	dolichyl-diphosphooligosaccharide--protein glycosyltransferase subunit OST3/OST6, putative	-0.184403	-0.124998	-0.081617	0.190663	0.010532
Pf3D7_01_v3	322121	326234	Pf3D7_01_v3	PF3D7_0107800	double-strand break repair protein MRE11	-0.039279	0.017107	0.022328	0.110769	0.058531
Pf3D7_01_v3	326235	327474	Pf3D7_01_v3	PF3D7_0107900	conserved Plasmodium protein, unknown function	-0.1041	-0.025785	-0.043102	-0.110624	-0.143851
Pf3D7_01_v3	328181	329808	Pf3D7_01_v3	PF3D7_0108000	proteasome subunit beta type-3, putative	-0.048589	0.002012	-0.037844	-0.008469	-0.051946
Pf3D7_01_v3	330488	332958	Pf3D7_01_v3	PF3D7_0108100	conserved protein, unknown function	-0.480166	-0.093902	-0.078162	-0.231054	-0.211353
Pf3D7_01_v3	336918	344083	Pf3D7_01_v3	PF3D7_0108300	conserved Plasmodium protein, unknown function	-0.51638	-0.044413	-0.015163	-0.181044	-0.167251
Pf3D7_01_v3	344150	346790	Pf3D7_01_v3	PF3D7_0108400	mitochondrial carrier protein, putative	-0.426663	-0.096776	-0.099926	-0.213616	-0.237105
Pf3D7_01_v3	348920	349852	Pf3D7_01_v3	PF3D7_0108500	conserved Plasmodium protein, unknown function	-0.408156	-0.031702	-0.208946	-0.269592	-0.170728
Pf3D7_01_v3	349853	351876	Pf3D7_01_v3	PF3D7_0108600	conserved protein, unknown function	-0.458175	-0.148185	-0.13223	-0.196971	-0.1676
Pf3D7_01_v3	352064	356461	Pf3D7_01_v3	PF3D7_0108700	secreted ookinete protein, putative	-0.321533	-0.044484	-0.110302	0.014782	-0.006456
Pf3D7_01_v3	357584	360589	Pf3D7_01_v3	PF3D7_0108800	mitochondrial carrier protein, putative	-0.184539	-0.15322	-0.081224	-0.532701	-0.265521
Pf3D7_01_v3	363068	364242	Pf3D7_01_v3	PF3D7_0109000	photosensitized INA-labeled protein PHIL1	-0.278578	-0.119178	-0.096703	0.163503	-0.03151
Pf3D7_01_v3	365360	369045	Pf3D7_01_v3	PF3D7_0109100	LCCL domain-containing protein	-0.33822	-0.141737	-0.173259	-0.143577	-0.193199
Pf3D7_01_v3	369230	370428	Pf3D7_01_v3	PF3D7_0109200	cleavage and polyadenylation specificity factor subunit 5, putative	-0.336857	-0.008703	-0.066187	-0.028041	-0.067349
Pf3D7_01_v3	371565	373262	Pf3D7_01_v3	PF3D7_0109300	fatty acid elongation protein, GNS1/SUR4 family, putative	-0.161799	-0.131863	-0.150679	0.086596	-0.163947
Pf3D7_01_v3	374189	375337	Pf3D7_01_v3	PF3D7_0109400	tubulin-specific chaperone a, putative	-0.064961	-0.013275	-0.021645	0.008162	-0.036411
Pf3D7_01_v3	376044	377254	Pf3D7_01_v3	PF3D7_0109500	N-acetyltransferase, GNAT family, putative	-0.102306	-0.065385	-0.083777	-0.021496	-0.105906
Pf3D7_01_v3	380447	382674	Pf3D7_01_v3	PF3D7_0109800	phenylalanine--tRNA ligase alpha subunit	0.06065	0.060752	0.049701	-0.080235	0.001968
Pf3D7_01_v3	383034	388156	Pf3D7_01_v3	PF3D7_0109850	phosphatidate cytidylyltransferase, putative	-0.059658	-0.079827	-0.118464	0.293724	0.176903
Pf3D7_01_v3	388157	389168	Pf3D7_01_v3	PF3D7_0110000	conserved Plasmodium protein, unknown function	-0.005855	0.020315	-0.058794	-0.098427	-0.127333
Pf3D7_01_v3	389169	392315	Pf3D7_01_v3	PF3D7_0110100	selenocysteine-specific elongation factor, putative	-0.128885	-0.050437	-0.109633	-0.050359	-0.030213
Pf3D7_01_v3	392354	393125	Pf3D7_01_v3	PF3D7_0110200	FAD-linked sulfhydryl oxidase ERV1, putative	-0.009137	0.028208	0.053106	0.111629	0.018081
Pf3D7_01_v3	393683	395085	Pf3D7_01_v3	PF3D7_0110400	DNA-directed RNA polymerase II subunit RPB9, putative	-0.031549	-0.048648	-0.02299	0.018046	-0.045189
Pf3D7_01_v3	396341	403856	Pf3D7_01_v3	PF3D7_0110500	bromodomain protein, putative	-0.013823	0.018995	-0.011084	-0.048904	0.001272
Pf3D7_01_v3	405489	412419	Pf3D7_01_v3	PF3D7_0110600	phosphatidylinositol-4-phosphate 5-kinase	-0.156268	-0.021681	0.008099	-0.107199	0.009108
Pf3D7_01_v3	413510	415350	Pf3D7_01_v3	PF3D7_0110700	chromatin assembly factor 1 protein WD40 domain, putative	-0.087824	-0.013475	-0.037043	0.056214	0.037233
Pf3D7_01_v3	417671	419857	Pf3D7_01_v3	PF3D7_0110800	transcription initiation factor TFIIB, putative	-0.006582	0.028246	-0.004479	0.170956	0.096801
Pf3D7_01_v3	420043	421103	Pf3D7_01_v3	PF3D7_0110900	adenylate kinase-like protein 1	-0.030454	-0.025533	-0.011156	-0.019556	0.01784
Pf3D7_01_v3	421526	427825	Pf3D7_01_v3	PF3D7_0111000	kinesin-8, putative	0.006219	0.034852	0.054071	0.12	0.082109
Pf3D7_01_v3	431289	435292	Pf3D7_01_v3	PF3D7_0111300	P-loop containing nucleoside triphosphate hydrolase, putative	-0.234059	-0.090719	-0.178419	0.105967	-0.076238
Pf3D7_01_v3	436158	438814	Pf3D7_01_v3	PF3D7_0111400	conserved Plasmodium protein, unknown function	-0.095974	-0.037329	-0.033823	0.01208	-0.032507
Pf3D7_01_v3	439402	441668	Pf3D7_01_v3	PF3D7_0111500	UMP-CMP kinase, putative	-0.15062	-0.068188	-0.039372	0.077548	-0.035609
Pf3D7_01_v3	445776	449099	Pf3D7_01_v3	PF3D7_0111800	eukaryotic translation initiation factor 4E, putative	-0.042158	0.045582	0.018515	0.097796	0.025449
Pf3D7_01_v3	450739	453368	Pf3D7_01_v3	PF3D7_0112000	TatD-like deoxyribonuclease	-0.118411	0.057593	0.080543	0.121692	0.032245
Pf3D7_01_v3	464476	470444	Pf3D7_01_v3	PF3D7_0112200	multidrug resistance-associated protein 1	-0.107406	0.028867	-0.011103	0.091427	0.08607
Pf3D7_01_v3	473489	475887	Pf3D7_01_v3	PF3D7_0112300	18S ribosomal RNA	-0.224177	-0.034747	-0.028491	-0.070022	-0.026108
Pf3D7_01_v3	476403	477278	Pf3D7_01_v3	PF3D7_0112500	5.8S ribosomal RNA	-0.042766	-0.015897	0.006555	0.082144	0.077059
Pf3D7_01_v3	477279	481595	Pf3D7_01_v3	PF3D7_0112700	28S ribosomal RNA	-0.16071	-0.055565	-0.094069	0.360655	0.2636
Pf3D7_01_v3	481596	482868	Pf3D7_01_v3	PF3D7_0112800	Plasmodium exported protein (hyp11), unknown function	0.043331	0.071217	0.06525	0.280161	0.24058
Pf3D7_01_v3	486250	487436	Pf3D7_01_v3	PF3D7_0112900	Plasmodium exported protein, unknown function	-0.069606	-0.013835	-0.031628	-0.048552	0.006046
Pf3D7_01_v3	487642	490377	Pf3D7_01_v3	PF3D7_0113000	glutamic acid-rich protein GARP	-0.155549	-0.119177	-0.095634	0.015924	-0.034428
Pf3D7_01_v3	494994	500326	Pf3D7_01_v3	PF3D7_0113100	surface-associated interspersed protein 1.1 (SURFIN 1.1)	-0.185569	-0.048915	-0.13431	0.222591	0.059316
Pf3D7_01_v3	500709	503118	Pf3D7_01_v3	PF3D7_0113200	Plasmodium exported protein, unknown function	-0.108375	0.059174	0.084188	0.278835	0.138401
Pf3D7_01_v3	504688	507124	Pf3D7_01_v3	PF3D7_0113300	Plasmodium exported protein (hyp1), unknown function	-0.095532	-0.013102	-0.011521	0.215782	0.102455
Pf3D7_01_v3	508002	509998	Pf3D7_01_v3	PF3D7_0113400	Plasmodium exported protein, unknown function	-0.123316	-0.020784	-0.025582	0.211161	0.135017
Pf3D7_01_v3	511836	518105	Pf3D7_01_v3	PF3D7_0113600	surface-associated interspersed protein 1.2 (SURFIN 1.2), pseudogene	-0.283757	-0.041005	-0.04199	0.16973	0.046728
Pf3D7_01_v3	520557	522829	Pf3D7_01_v3	PF3D7_0113700	heat shock protein 40, type II	-0.076457	-0.004072	-0.015514	0.112689	-0.014461
Pf3D7_01_v3	526857	536601	Pf3D7_01_v3	PF3D7_0113800	DBL containing protein, unknown function	-0.068503	-0.026398	-0.008509	0.135765	0.058518
Pf3D7_01_v3	536859	538275	Pf3D7_01_v3	PF3D7_0113900	CX3CL1-binding protein 1	-0.051097	-0.006098	-0.094617	0.070202	0.009911
Pf3D7_01_v3	542230	547233	Pf3D7_01_v3	PF3D7_0114000	exported protein family 1	-0.108438	-0.021306	-0.031103	0.108503	0.066845
Pf3D7_01_v3	550326	551963	Pf3D7_01_v3	PF3D7_0114200	exported protein family 3	-0.09807	-0.000395	0.061101	0.299811	0.104282
Pf3D7_01_v3	552390	553927	Pf3D7_01_v3	PF3D7_0114300	exported protein family 4, pseudogene	-0.068592	-0.032302	-0.019599	0.014442	0.005539
Pf3D7_01_v3	553928	555689	Pf3D7_01_v3	PF3D7_0114400	erythrocyte membrane protein 1 (PfEMP1), exon 2, pseudogene	-0.243016	-0.119969	-0.128645	0.022658	0.013393
Pf3D7_01_v3	560224	561784	Pf3D7_01_v3	PF3D7_0114600	stevor, pseudogene	-0.166971	-0.105044	-0.106899	0.146304	0.053189
Pf3D7_01_v3	563453	565092	Pf3D7_01_v3	PF3D7_0114700	rifin	-0.166437	-0.104	-0.054824	-0.114434	-0.078436
Pf3D7_01_v3	569235	570522	Pf3D7_01_v3	PF3D7_0114800	Plasmodium exported protein (hyp7), unknown function	-0.131564	-0.070668	-0.125516	-0.027285	-0.124006
Pf3D7_01_v3	571885	573103	Pf3D7_01_v3	PF3D7_0114900	Plasmodium exported protein, unknown function, pseudogene	-0.1421	-0.023656	-0.118584	-0.098511	-0.118935
Pf3D7_01_v3	577454	584039	Pf3D7_01_v3	PF3D7_0115000	surface-associated interspersed protein 1.3 (SURFIN 1.3)	-0.23373	-0.085889	0.001735	0.040584	0.000117
Pf3D7_01_v3	591599	593437	Pf3D7_01_v3	PF3D7_0115200	rifin	-0.186337	-0.110103	-0.048171	-0.035618	-0.112632
Pf3D7_01_v3	594852	596523	Pf3D7_01_v3	PF3D7_0115300	rifin	-0.158477	-0.08455	-0.079468	0.079269	-0.065499
Pf3D7_01_v3	598215	599722	Pf3D7_01_v3	PF3D7_0115400	stevor	-0.189631	-0.09731	-0.02641	0.093386	-0.049717
Pf3D7_01_v3	603912	605781	Pf3D7_01_v3	PF3D7_0115600	rifin	-0.30196	-0.205199	-0.071244	-0.170119	-0.149631
Pf3D7_01_v3	607140	615143	Pf3D7_01_v3	PF3D7_0115700	erythrocyte membrane protein 1, PfEMP1	-0.252831	-0.099532	-0.101405	-0.027725	-0.126561
Pf3D7_02_v3	24982	31418	Pf3D7_02_v3	PF3D7_0200100	erythrocyte membrane protein 1, PfEMP1	-0.127221	-0.073267	-0.157864	0.624702	0.143674
Pf3D7_02_v3	32780	34509	Pf3D7_02_v3	PF3D7_0200200	rifin	-0.010106	0.034955	0.019071	0.127158	0.005801
Pf3D7_02_v3	38037	39553	Pf3D7_02_v3	PF3D7_0200400	stevor	0.067648	0.066577	0.001669	0.259861	0.16952
Pf3D7_02_v3	41265	43108	Pf3D7_02_v3	PF3D7_0200500	rifin	-0.380519	-0.03988	-0.00294	0.10776	-0.049885
Pf3D7_02_v3	45036	46808	Pf3D7_02_v3	PF3D7_0200600	rifin	-0.347729	0.010967	-0.083179	-0.072918	-0.126287
Pf3D7_02_v3	48673	50397	Pf3D7_02_v3	PF3D7_0200700	rifin	-0.142238	0.105053	0.081168	0.241779	0.12953
Pf3D7_02_v3	54004	55505	Pf3D7_02_v3	PF3D7_0200900	stevor, pseudogene	-0.047849	-0.051052	0.007009	-0.079937	-0.096484
Pf3D7_02_v3	57094	58671	Pf3D7_02_v3	PF3D7_0201000	rifin	-0.106773	-0.028193	-0.063873	0.064744	0.047615
Pf3D7_02_v3	66279	67795	Pf3D7_02_v3	PF3D7_0201300	stevor	-0.088199	-0.043923	-0.07731	0.16048	0.009666
Pf3D7_02_v3	109314	110830	Pf3D7_02_v3	PF3D7_0202100	liver stage associated protein 2	-0.016787	0.092912	0.132713	0.051805	0.106705
Pf3D7_02_v3	112297	113932	Pf3D7_02_v3	PF3D7_0202200	EMP1-trafficking protein	-0.197251	-0.072287	-0.081466	-0.099092	-0.113066
Pf3D7_02_v3	116975	118485	Pf3D7_02_v3	PF3D7_0202300	Plasmodium exported protein (hyp11), unknown function	-0.14351	0.005954	-0.00786	-0.11639	-0.07197
Pf3D7_02_v3	120274	124352	Pf3D7_02_v3	PF3D7_0202400	translation-enhancing factor	-0.167451	-0.047604	-0.045831	0.051044	-0.012244
Pf3D7_02_v3	127744	128564	Pf3D7_02_v3	PF3D7_0202500	early transcribed membrane protein 2	-0.054416	-0.084256	-0.097417	-0.051083	-0.050094
Pf3D7_02_v3	129092	133813	Pf3D7_02_v3	PF3D7_0202600	nucleic acid binding protein, putative	0.074373	0.028931	0.128736	0.008562	0.047545
Pf3D7_02_v3	135273	137348	Pf3D7_02_v3	PF3D7_0202700	octaprenyl pyrophosphate synthase	0.075457	0.004304	0.07242	0.012634	-0.022724
Pf3D7_02_v3	137349	138639	Pf3D7_02_v3	PF3D7_0202800	conserved Plasmodium protein, unknown function	-0.044942	-0.044937	0.010627	0.110137	0.067088
Pf3D7_02_v3	138677	141408	Pf3D7_02_v3	PF3D7_0202900	palmitoyltransferase DHHC12, putative	-0.104966	-0.133765	-0.105697	0.196062	-0.020911
Pf3D7_02_v3	141409	147814	Pf3D7_02_v3	PF3D7_0203000	repetitive organellar protein, putative	0.017841	0.082095	0.118502	0.124718	0.034831
Pf3D7_02_v3	149274	157231	Pf3D7_02_v3	PF3D7_0203100	protein kinase, putative	-0.132665	-0.085277	-0.087828	0.140876	0.028668
Pf3D7_02_v3	157887	159910	Pf3D7_02_v3	PF3D7_0203200	conserved Plasmodium protein, unknown function	-0.134317	-0.067108	-0.052062	0.010036	-0.076459
Pf3D7_02_v3	160264	161492	Pf3D7_02_v3	PF3D7_0203300	ERCC1 nucleotide excision repair protein, putative	-0.063111	-0.037512	-0.036761	0.051838	0.014992
Pf3D7_02_v3	161815	163150	Pf3D7_02_v3	PF3D7_0203400	conserved Plasmodium protein, unknown function	-0.044294	0.055182	-0.047584	-0.210634	-0.081133
Pf3D7_02_v3	165894	168301	Pf3D7_02_v3	PF3D7_0203600	conserved Plasmodium protein, unknown function	-0.160517	-0.027163	-0.048725	-0.034586	-0.092298
Pf3D7_02_v3	168432	170386	Pf3D7_02_v3	PF3D7_0203700	protein MAK16, putative	-0.015691	-0.027796	0.132678	0.454518	0.158535
Pf3D7_02_v3	171313	175162	Pf3D7_02_v3	PF3D7_0203800	conserved Plasmodium protein, unknown function	0.160766	0.066588	0.038843	0.004418	0.052171
Pf3D7_02_v3	176317	178550	Pf3D7_02_v3	PF3D7_0203900	5'-3' exonuclease, N-terminal resolvase-like domain, putative	0.028765	-0.009153	-0.015085	-0.01188	0.009896
Pf3D7_02_v3	178705	181776	Pf3D7_02_v3	PF3D7_0204000	condensin-2 complex subunit H2, putative	0.064109	0.00891	-0.072847	0.18105	0.058712
Pf3D7_02_v3	181978	189365	Pf3D7_02_v3	PF3D7_0204100	Sel1 repeat-containing protein, putative	-0.086366	-0.057575	-0.090468	0.084762	-0.019577
Pf3D7_02_v3	192568	194449	Pf3D7_02_v3	PF3D7_0204200	conserved Plasmodium protein, unknown function	0.080744	0.058191	0.049395	0.179204	0.138831
Pf3D7_02_v3	194576	197067	Pf3D7_02_v3	PF3D7_0204300	conserved Plasmodium protein, unknown function	-0.040785	-0.061899	-0.059801	-0.003619	-0.023608
Pf3D7_02_v3	197068	198198	Pf3D7_02_v3	PF3D7_0204400	dynein light chain, putative	-0.011805	-0.018115	0.053966	0.197142	0.052475
Pf3D7_02_v3	198199	199820	Pf3D7_02_v3	PF3D7_0204500	aspartate transaminase	0.000226	0.020397	0.013584	0.136973	0.139189
Pf3D7_02_v3	200232	204298	Pf3D7_02_v3	PF3D7_0204600	5'-3' exonuclease, putative	0.076833	0.050547	0.044371	0.11275	0.129436
Pf3D7_02_v3	205639	207653	Pf3D7_02_v3	PF3D7_0204700	hexose transporter	-0.158397	-0.089793	0.037528	-0.110705	-0.034875
Pf3D7_02_v3	209333	211083	Pf3D7_02_v3	PF3D7_0204800	3'-5' exonuclease, putative	-0.046604	-0.012632	-0.147596	0.023609	0.025928
Pf3D7_02_v3	211098	212804	Pf3D7_02_v3	PF3D7_0204900	2-methoxy-6-polyprenyl-1,4-benzoquinol methylase, mitochondrial, putative	-0.12821	-0.062329	-0.047135	0.105531	0.040746
Pf3D7_02_v3	212805	214673	Pf3D7_02_v3	PF3D7_0205000	conserved Plasmodium protein, unknown function	-0.105062	-0.021874	0.026055	0.208879	0.103056
Pf3D7_02_v3	214674	217598	Pf3D7_02_v3	PF3D7_0205100	conserved Plasmodium protein, unknown function	-0.06296	0.124297	0.16131	-0.025933	0.102129
Pf3D7_02_v3	217632	219157	Pf3D7_02_v3	PF3D7_0205200	MORN repeat protein, putative	-0.07641	-0.014847	-0.011332	0.231868	0.158794
Pf3D7_02_v3	219440	222506	Pf3D7_02_v3	PF3D7_0205300	conserved Plasmodium protein, unknown function	-0.066769	0.012261	-0.025008	-0.015446	-0.005936
Pf3D7_02_v3	223228	225101	Pf3D7_02_v3	PF3D7_0205400	PCI domain-containing protein, putative	-0.101205	-0.014895	-0.015625	0.047502	0.060437
Pf3D7_02_v3	225312	226495	Pf3D7_02_v3	PF3D7_0205500	DNA-directed RNA polymerase II 16 kDa subunit, putative	-0.023249	0.070214	0.02391	0.088635	0.081909
Pf3D7_02_v3	227775	230182	Pf3D7_02_v3	PF3D7_0205600	conserved Plasmodium protein, unknown function	-0.079407	-0.018543	0.009363	0.101049	0.0727
Pf3D7_02_v3	230891	232629	Pf3D7_02_v3	PF3D7_0205700	RNA-binding protein, putative	-0.230878	-0.177253	-0.120903	-0.099699	-0.121932
Pf3D7_02_v3	232630	233726	Pf3D7_02_v3	PF3D7_0205800	PH domain-containing protein, putative	-0.156633	0.037721	0.000582	0.038172	0.038199
Pf3D7_02_v3	234987	239031	Pf3D7_02_v3	PF3D7_0205900	26S proteasome regulatory subunit RPN1, putative	-0.007651	0.06587	0.112279	-0.182234	0.005362
Pf3D7_02_v3	239032	244046	Pf3D7_02_v3	PF3D7_0206000	DNA repair protein RAD2, putative	-0.073067	-0.006812	0.023163	0.061495	0.090156
Pf3D7_02_v3	245108	246949	Pf3D7_02_v3	PF3D7_0206100	cysteine desulfuration protein SufE	-0.164959	0.068665	0.008409	-0.022724	-0.035982
Pf3D7_02_v3	248780	250977	Pf3D7_02_v3	PF3D7_0206200	pantothenate transporter	-0.03564	0.005729	0.033513	0.135349	0.096463
Pf3D7_02_v3	252144	262693	Pf3D7_02_v3	PF3D7_0206300	pentafunctional AROM polypeptide, putative, pseudogene	-0.04611	0.05232	0.009702	0.323551	0.156643
Pf3D7_02_v3	262787	267597	Pf3D7_02_v3	PF3D7_0206500	conserved Plasmodium protein, unknown function	0.011523	0.06447	0.044716	0.135852	0.082269
Pf3D7_02_v3	271344	273259	Pf3D7_02_v3	PF3D7_0206700	adenylosuccinate lyase	0.025797	0.046676	0.082381	0.140131	0.10906
Pf3D7_02_v3	273439	274757	Pf3D7_02_v3	PF3D7_0206800	merozoite surface protein 2	0.04685	-0.002882	0.047345	0.117153	0.12126
Pf3D7_02_v3	275290	276827	Pf3D7_02_v3	PF3D7_0206900	merozoite surface protein 5	0.099113	0.087543	0.094641	0.008666	0.075019
Pf3D7_02_v3	277244	278706	Pf3D7_02_v3	PF3D7_0207000	merozoite surface protein 4	1.7e-05	-0.026581	-0.018803	0.025185	0.045503
Pf3D7_02_v3	281657	287595	Pf3D7_02_v3	PF3D7_0207100	conserved Plasmodium protein, unknown function	0.008018	0.020737	0.01552	0.09455	0.063496
Pf3D7_02_v3	289918	292953	Pf3D7_02_v3	PF3D7_0207300	serine repeat antigen 8	0.038331	0.083905	0.066853	0.169304	0.110358
Pf3D7_02_v3	294023	297866	Pf3D7_02_v3	PF3D7_0207400	serine repeat antigen 7	-0.035645	0.053841	0.038484	0.040507	0.066164
Pf3D7_02_v3	298647	302814	Pf3D7_02_v3	PF3D7_0207500	serine repeat antigen 6	-0.058252	0.131395	0.112786	0.170934	0.075279
Pf3D7_02_v3	303343	307277	Pf3D7_02_v3	PF3D7_0207600	serine repeat antigen 5	-0.099732	-0.038327	0.024627	0.089025	0.058993
Pf3D7_02_v3	308597	312405	Pf3D7_02_v3	PF3D7_0207700	serine repeat antigen 4	-0.179834	-0.048985	-0.05338	0.045847	-0.013411
Pf3D7_02_v3	313199	316991	Pf3D7_02_v3	PF3D7_0207800	serine repeat antigen 3	-0.070106	-0.202945	-0.155662	-0.260185	-0.226384
Pf3D7_02_v3	317346	321560	Pf3D7_02_v3	PF3D7_0207900	serine repeat antigen 2	-0.052427	-0.002233	0.025407	0.08904	0.051302
Pf3D7_02_v3	322088	325973	Pf3D7_02_v3	PF3D7_0208000	serine repeat antigen 1	0.162019	0.094235	0.059779	0.288744	0.183247
Pf3D7_02_v3	327682	335441	Pf3D7_02_v3	PF3D7_0208100	conserved Plasmodium protein, unknown function	-0.068489	-0.012487	0.025118	0.054239	-0.038998
Pf3D7_02_v3	335442	336831	Pf3D7_02_v3	PF3D7_0208200	KRR1 small subunit processome component, putative	0.085885	0.017935	0.015403	0.27894	0.161179
Pf3D7_02_v3	337308	343137	Pf3D7_02_v3	PF3D7_0208300	conserved Plasmodium protein, unknown function	0.096027	0.027926	0.038005	0.11708	0.112073
Pf3D7_02_v3	343138	349590	Pf3D7_02_v3	PF3D7_0208400	conserved Plasmodium protein, unknown function	0.084045	0.054414	0.039436	0.191622	0.149199
Pf3D7_02_v3	352586	353878	Pf3D7_02_v3	PF3D7_0208500	acyl carrier protein	0.074008	0.028006	0.030735	0.113552	0.037332
Pf3D7_02_v3	354371	356309	Pf3D7_02_v3	PF3D7_0208600	ribosome-recycling factor	-0.003157	0.037025	0.0415	-0.030022	-0.084763
Pf3D7_02_v3	356310	358264	Pf3D7_02_v3	PF3D7_0208700	conserved Plasmodium protein, unknown function, unspecified product	0.004905	0.00509	0.019329	0.099618	0.108277
Pf3D7_02_v3	358892	360099	Pf3D7_02_v3	PF3D7_0208800	conserved Plasmodium protein, unknown function	-0.009942	0.046576	0.008435	0.111793	-0.010523
Pf3D7_02_v3	360578	368604	Pf3D7_02_v3	PF3D7_0208900	6-cysteine protein P230p	0.025807	0.054309	0.057371	0.179112	0.155364
Pf3D7_02_v3	370188	380095	Pf3D7_02_v3	PF3D7_0209000	6-cysteine protein P230	2.6e-05	0.070897	0.046703	0.07622	0.085619
Pf3D7_02_v3	380880	383695	Pf3D7_02_v3	PF3D7_0209100	patatin-like phospholipase, putative	0.034135	-0.021473	-0.04689	-0.088615	-0.076159
Pf3D7_02_v3	384615	386830	Pf3D7_02_v3	PF3D7_0209200	exosome complex component MTR3, putative	0.084613	0.011729	-0.010526	0.380016	0.174942
Pf3D7_02_v3	387023	388287	Pf3D7_02_v3	PF3D7_0209300	2C-methyl-D-erythritol 2,4-cyclodiphosphate synthase	0.055265	-0.034073	0.004872	0.122439	0.047178
Pf3D7_02_v3	388288	390861	Pf3D7_02_v3	PF3D7_0209400	conserved protein, unknown function	-0.011146	0.017999	-0.021968	0.005496	-0.047013
Pf3D7_02_v3	391025	393039	Pf3D7_02_v3	PF3D7_0209500	conserved Plasmodium protein, unknown function	-0.014979	0.007859	0.043695	-0.205713	-0.175007
Pf3D7_02_v3	393987	398995	Pf3D7_02_v3	PF3D7_0209600	transporter, putative	-0.009322	-0.021212	-0.097524	0.026816	-0.006165
Pf3D7_02_v3	399903	402109	Pf3D7_02_v3	PF3D7_0209700	RING zinc finger protein, putative	-0.013816	0.016802	-0.000511	-0.038071	-0.049008
Pf3D7_02_v3	404031	406605	Pf3D7_02_v3	PF3D7_0209800	ATP-dependent RNA helicase UAP56	-0.061416	-0.041277	0.049966	-0.055922	0.002886
Pf3D7_02_v3	409733	410478	Pf3D7_02_v3	PF3D7_0210000	secretory complex protein 61 gamma subunit	0.000883	-0.000739	-0.019832	-0.144043	-0.056288
Pf3D7_02_v3	413069	421387	Pf3D7_02_v3	PF3D7_0210200	conserved Plasmodium protein, unknown function	0.183829	0.156144	0.150176	-0.013213	0.092103
Pf3D7_02_v3	422813	424904	Pf3D7_02_v3	PF3D7_0210300	monocarboxylate transporter, putative	-0.100949	-0.059885	-0.07612	0.01571	0.014836
Pf3D7_02_v3	425439	426747	Pf3D7_02_v3	PF3D7_0210400	50S ribosomal protein L33, putative	-0.049466	-0.003702	-0.074625	-0.113368	-0.068428
Pf3D7_02_v3	427240	431780	Pf3D7_02_v3	PF3D7_0210500	conserved Plasmodium protein, unknown function	-0.045353	0.02641	-0.005022	0.095917	0.053207
Pf3D7_02_v3	431791	434336	Pf3D7_02_v3	PF3D7_0210600	conserved protein, unknown function	0.067023	0.23628	0.159468	-0.07569	-0.016967
Pf3D7_02_v3	435800	437244	Pf3D7_02_v3	PF3D7_0210700	syntaxin, Qa-SNARE family	0.008815	0.090174	0.051543	-0.136687	-0.000551
Pf3D7_02_v3	437505	439252	Pf3D7_02_v3	PF3D7_0210800	conserved Plasmodium protein, unknown function	0.089116	0.051552	0.059209	-0.093326	-0.025301
Pf3D7_02_v3	441830	443184	Pf3D7_02_v3	PF3D7_0210900	conserved Plasmodium protein, unknown function	0.106834	0.136413	0.132805	-0.18517	-0.005818
Pf3D7_02_v3	443574	444858	Pf3D7_02_v3	PF3D7_0211000	unspecified product	0.010372	0.03808	0.03248	0.084235	0.061374
Pf3D7_02_v3	451501	455347	Pf3D7_02_v3	PF3D7_0211100	conserved Plasmodium protein, unknown function	0.114276	0.072217	0.086575	-0.02961	-0.008653
Pf3D7_02_v3	455348	456536	Pf3D7_02_v3	PF3D7_0211200	ras-related protein Rab-5A	0.035246	0.012004	0.027442	0.169979	0.187119
Pf3D7_02_v3	456880	458828	Pf3D7_02_v3	PF3D7_0211300	ubiquinol-cytochrome-c reductase complex assembly factor 1, putative	-0.037189	0.04249	-0.019639	0.051308	0.062301
Pf3D7_02_v3	458829	461768	Pf3D7_02_v3	PF3D7_0211400	beta-ketoacyl-ACP synthase III	-0.03898	-0.085886	-0.101072	0.113121	0.038528
Pf3D7_02_v3	462913	467150	Pf3D7_02_v3	PF3D7_0211500	GAF domain-related protein, putative	0.007154	0.02254	0.026364	0.179614	0.132713
Pf3D7_02_v3	467597	468726	Pf3D7_02_v3	PF3D7_0211600	UDP-N-acetylglucosamine transferase subunit ALG14, putative	0.036842	0.031492	0.004482	0.009782	0.057201
Pf3D7_02_v3	469540	473741	Pf3D7_02_v3	PF3D7_0211700	tyrosine kinase-like protein, putative	0.046948	-0.01979	0.027198	0.080824	0.040641
Pf3D7_02_v3	474992	477253	Pf3D7_02_v3	PF3D7_0211800	asparagine--tRNA ligase	0.049133	0.022954	0.02826	0.173767	0.120705
Pf3D7_02_v3	477254	479341	Pf3D7_02_v3	PF3D7_0211900	pseudouridine synthase, putative	0.13327	-0.012643	-0.008162	0.323241	0.179629
Pf3D7_02_v3	479850	481682	Pf3D7_02_v3	PF3D7_0212000	GDP-fructose:GMP antiporter, putative	-0.127067	0.057693	-0.01076	-0.20579	-0.14224
Pf3D7_02_v3	483186	489220	Pf3D7_02_v3	PF3D7_0212100	conserved Plasmodium protein, unknown function	0.088726	0.026487	0.020144	0.059891	0.008217
Pf3D7_02_v3	489654	491068	Pf3D7_02_v3	PF3D7_0212200	ribosomal protein L12, mitochondrial, putative	0.000806	0.05524	0.028244	0.02061	0.002123
Pf3D7_02_v3	492366	494556	Pf3D7_02_v3	PF3D7_0212300	peptide chain release factor subunit 1, putative	0.058598	0.131507	0.020204	0.165891	0.078261
Pf3D7_02_v3	494916	508104	Pf3D7_02_v3	PF3D7_0212400	conserved Plasmodium membrane protein, unknown function	0.027372	0.045693	0.006116	0.084769	0.082596
Pf3D7_02_v3	509275	521996	Pf3D7_02_v3	PF3D7_0212500	conserved Plasmodium protein, unknown function	0.012451	-0.008974	0.01732	0.157902	0.057879
Pf3D7_02_v3	522681	524249	Pf3D7_02_v3	PF3D7_0212600	secreted protein with altered thrombospondin repeat domain	-0.006609	0.029796	-0.017328	0.102298	0.065874
Pf3D7_02_v3	524450	526293	Pf3D7_02_v3	PF3D7_0212700	SRR1-like protein	0.128087	0.177513	0.114696	0.179726	0.093256
Pf3D7_02_v3	527999	532173	Pf3D7_02_v3	PF3D7_0212800	multidrug efflux pump, putative	0.106011	0.144878	0.043427	0.091817	0.014151
Pf3D7_02_v3	533003	534600	Pf3D7_02_v3	PF3D7_0212900	arginyl-tRNA--protein transferase	-0.010411	0.006762	-0.017066	0.074266	0.031571
Pf3D7_02_v3	535396	536396	Pf3D7_02_v3	PF3D7_0213000	conserved protein, unknown function	-0.00374	-0.02013	0.078528	0.148105	0.063271
Pf3D7_02_v3	537539	539670	Pf3D7_02_v3	PF3D7_0213100	protein SIS1	0.010741	0.008342	0.046889	0.20028	0.148462
Pf3D7_02_v3	541680	546145	Pf3D7_02_v3	PF3D7_0213400	protein kinase 7	-0.049233	0.005251	0.027855	0.309025	0.213938
Pf3D7_02_v3	546232	555544	Pf3D7_02_v3	PF3D7_0213600	conserved Plasmodium protein, unknown function	0.002587	0.044755	0.036826	0.232928	0.107113
Pf3D7_02_v3	556798	557946	Pf3D7_02_v3	PF3D7_0213700	conserved protein, unknown function	-0.101836	0.017069	0.045836	0.18067	0.053998
Pf3D7_02_v3	558335	560844	Pf3D7_02_v3	PF3D7_0213800	conserved protein, unknown function	0.047432	0.032271	0.048636	0.236081	0.072658
Pf3D7_02_v3	560872	564872	Pf3D7_02_v3	PF3D7_0213900	RTR1 domain-containing protein, putative	-0.048033	0.080449	0.048104	0.158522	0.107485
Pf3D7_02_v3	565871	568144	Pf3D7_02_v3	PF3D7_0214000	T-complex protein 1 subunit theta	-0.031398	0.002376	0.008427	-0.038421	-0.085182
Pf3D7_02_v3	568279	573565	Pf3D7_02_v3	PF3D7_0214100	protein transport protein SEC31	-0.078016	0.004134	0.04822	0.000949	-0.006464
Pf3D7_02_v3	574905	576304	Pf3D7_02_v3	PF3D7_0214200	ribosomal protein L13, mitochondrial	0.042965	0.06139	0.10115	0.163166	0.145606
Pf3D7_02_v3	578412	586414	Pf3D7_02_v3	PF3D7_0214300	conserved Plasmodium protein, unknown function	-0.004906	0.069837	0.079456	0.062175	0.058539
Pf3D7_02_v3	586515	589301	Pf3D7_02_v3	PF3D7_0214400	conserved protein, unknown function	-0.053689	0.068707	0.062402	0.053243	0.03817
Pf3D7_02_v3	590251	591671	Pf3D7_02_v3	PF3D7_0214500	conserved Plasmodium protein, unknown function	0.210607	0.137613	0.053172	0.138751	0.072195
Pf3D7_02_v3	593946	599584	Pf3D7_02_v3	PF3D7_0214600	serine/threonine protein kinase, putative	0.066576	0.067983	0.164168	0.185276	0.137045
Pf3D7_02_v3	599585	601962	Pf3D7_02_v3	PF3D7_0214700	conserved Plasmodium protein, unknown function	0.041026	0.050949	-0.002073	-0.030727	-0.052156
Pf3D7_02_v3	604795	609575	Pf3D7_02_v3	PF3D7_0214800	conserved Plasmodium membrane protein, unknown function	-0.067191	0.072403	-0.016161	0.042176	-0.034294
Pf3D7_02_v3	610375	615622	Pf3D7_02_v3	PF3D7_0214900	rhoptry neck protein 6	-0.047426	-0.063186	-0.05255	-0.057876	-0.014753
Pf3D7_02_v3	616522	619679	Pf3D7_02_v3	PF3D7_0215000	acyl-CoA synthetase	0.038436	0.044673	0.08498	0.066051	0.117627
Pf3D7_02_v3	622274	624556	Pf3D7_02_v3	PF3D7_0215100	RING zinc finger protein, putative	-0.053366	0.001033	0.040004	0.103837	0.059868
Pf3D7_02_v3	626726	627960	Pf3D7_02_v3	PF3D7_0215200	conserved Plasmodium protein, unknown function	0.040371	0.087308	0.145964	0.231574	0.122967
Pf3D7_02_v3	628392	631558	Pf3D7_02_v3	PF3D7_0215300	acyl-CoA synthetase	0.024867	0.059821	0.011413	0.11968	0.082298
Pf3D7_02_v3	634339	637757	Pf3D7_02_v3	PF3D7_0215400	conserved Plasmodium protein, unknown function	-0.090976	-0.001406	-0.067367	0.086708	-0.007156
Pf3D7_02_v3	640150	642900	Pf3D7_02_v3	PF3D7_0215500	conserved Plasmodium protein, unknown function	-0.06434	0.089435	0.033064	0.234015	0.103907
Pf3D7_02_v3	642901	644567	Pf3D7_02_v3	PF3D7_0215600	conserved Plasmodium protein, unknown function	-0.10469	-0.005865	-0.052078	-0.101277	0.003499
Pf3D7_02_v3	645679	650335	Pf3D7_02_v3	PF3D7_0215700	DNA-directed RNA polymerase II subunit RPB2, putative	-0.039078	0.054018	0.089687	-0.027053	0.036836
Pf3D7_02_v3	650413	653612	Pf3D7_02_v3	PF3D7_0215800	origin recognition complex subunit 5	-0.071142	-0.013345	0.002097	0.122352	0.054067
Pf3D7_02_v3	654668	657090	Pf3D7_02_v3	PF3D7_0215900	palmitoyltransferase DHHC11, putative	-0.059381	0.036704	-0.031107	-0.021711	-0.019751
Pf3D7_02_v3	658386	664806	Pf3D7_02_v3	PF3D7_0216000	DEAD/DEAH box helicase, putative	-0.023249	-0.037426	-0.103878	-0.02956	-0.007029
Pf3D7_02_v3	664807	668758	Pf3D7_02_v3	PF3D7_0216100	conserved Plasmodium protein, unknown function	0.049409	0.045053	-0.008052	0.041591	0.101415
Pf3D7_02_v3	668759	670091	Pf3D7_02_v3	PF3D7_0216200	conserved Plasmodium protein, unknown function	0.031159	-0.043273	-0.110668	0.083866	0.04474
Pf3D7_02_v3	670163	674808	Pf3D7_02_v3	PF3D7_0216300	conserved Plasmodium protein, unknown function	0.018992	-0.010639	-0.020277	0.216541	0.088314
Pf3D7_02_v3	675181	677849	Pf3D7_02_v3	PF3D7_0216400	vacuolar protein sorting-associated protein 45	0.043794	-0.017759	0.041158	0.13965	0.083667
Pf3D7_02_v3	678237	683953	Pf3D7_02_v3	PF3D7_0216500	conserved Plasmodium protein, unknown function	-0.122924	-0.043516	-0.068008	-0.019227	-0.075457
Pf3D7_02_v3	686235	688795	Pf3D7_02_v3	PF3D7_0216600	MtN3-like protein	-0.14361	-0.173365	-0.135206	-0.247485	-0.095243
Pf3D7_02_v3	690061	695988	Pf3D7_02_v3	PF3D7_0216700	autophagy-related protein 11, putative	-0.105554	-0.030109	0.03049	0.00077	0.098429
Pf3D7_02_v3	695989	699811	Pf3D7_02_v3	PF3D7_0216800	TMEM121 domain-containing protein, putative	0.035293	0.012904	-9e-05	0.148276	0.088089
Pf3D7_02_v3	700995	702992	Pf3D7_02_v3	PF3D7_0216900	conserved Plasmodium protein, unknown function	0.00938	-0.005383	0.023637	0.002047	-0.005908
Pf3D7_02_v3	702993	706837	Pf3D7_02_v3	PF3D7_0217000	conserved Plasmodium membrane protein, unknown function	-0.189956	-0.095255	-0.07367	-0.010184	-0.071559
Pf3D7_02_v3	707488	709596	Pf3D7_02_v3	PF3D7_0217100	ATP synthase subunit alpha, mitochondrial	-0.009939	-0.036962	-0.066516	0.138392	0.083927
Pf3D7_02_v3	709597	715502	Pf3D7_02_v3	PF3D7_0217200	conserved Plasmodium protein, unknown function	-0.084573	-0.018642	-0.0766	0.076782	-0.042949
Pf3D7_02_v3	715548	716799	Pf3D7_02_v3	PF3D7_0217300	AP-2 complex subunit sigma, putative	-0.187292	-0.07048	0.088649	0.024052	-0.102781
Pf3D7_02_v3	717442	718531	Pf3D7_02_v3	PF3D7_0217400	conserved protein, unknown function	-0.134575	-0.127459	-0.075514	-0.109445	-0.105062
Pf3D7_02_v3	720187	722911	Pf3D7_02_v3	PF3D7_0217500	calcium-dependent protein kinase 1	-0.115586	-0.128541	-0.152928	-0.092038	-0.118715
Pf3D7_02_v3	723497	730182	Pf3D7_02_v3	PF3D7_0217600	conserved Plasmodium protein, unknown function	-0.037897	-0.078609	0.011978	-0.076286	-0.086512
Pf3D7_02_v3	730870	732562	Pf3D7_02_v3	PF3D7_0217700	E2F-associated phosphoprotein, putative	-0.018709	0.064956	0.145406	-0.081479	-0.025974
Pf3D7_02_v3	734022	734845	Pf3D7_02_v3	PF3D7_0217800	40S ribosomal protein S26	-0.060092	-0.067819	-0.057587	0.077809	0.014641
Pf3D7_02_v3	735188	737247	Pf3D7_02_v3	PF3D7_0217900	conserved Plasmodium protein, unknown function	-0.074613	-0.04218	0.02751	0.130558	0.144899
Pf3D7_02_v3	738610	740102	Pf3D7_02_v3	PF3D7_0218000	replication factor C subunit 2, putative	-0.060706	0.079287	0.001936	-0.248959	-0.137205
Pf3D7_02_v3	740764	742709	Pf3D7_02_v3	PF3D7_0218100	conserved protein, unknown function	0.022876	-0.005153	-0.048062	0.111402	0.002456
Pf3D7_02_v3	743039	745962	Pf3D7_02_v3	PF3D7_0218200	SUZ domain-containing protein, putative	-0.153269	-0.084752	-0.091566	-0.177339	-0.097504
Pf3D7_02_v3	747316	749615	Pf3D7_02_v3	PF3D7_0218300	rRNA methyltransferase, putative	-0.072321	-0.042289	-0.040387	0.050176	-0.005642
Pf3D7_02_v3	749799	751987	Pf3D7_02_v3	PF3D7_0218400	ATP-dependent RNA helicase DDX47, putative	-0.019257	0.010791	-0.033211	-0.103572	-0.007937
Pf3D7_02_v3	752716	753689	Pf3D7_02_v3	PF3D7_0218500	small nuclear ribonucleoprotein Sm D2, putative	-0.107342	-0.016759	-0.055221	0.030175	0.005319
Pf3D7_02_v3	755168	762810	Pf3D7_02_v3	PF3D7_0218600	patatin-like phospholipase, putative	-0.278496	-0.106981	-0.087021	-0.149293	-0.151147
Pf3D7_02_v3	763241	765441	Pf3D7_02_v3	PF3D7_0218700	pre-mRNA-processing protein 45, putative	-0.214127	-0.229009	-0.200934	0.030386	-0.140136
Pf3D7_02_v3	766140	767265	Pf3D7_02_v3	PF3D7_0218800	ribonuclease P	0.043228	-0.003467	0.003733	0.219056	0.148248
Pf3D7_02_v3	769511	771291	Pf3D7_02_v3	PF3D7_0219100	saccharopine dehydrogenase, putative	0.023482	-0.00195	0.010706	0.056137	0.082513
Pf3D7_02_v3	774565	776286	Pf3D7_02_v3	PF3D7_0219400	ribosome associated membrane protein RAMP4, putative, unspecified product	-0.103553	-0.100705	-0.095399	0.277454	0.056654
Pf3D7_02_v3	776578	778315	Pf3D7_02_v3	PF3D7_0219500	pseudouridine synthase, putative	0.04831	0.065284	0.109594	-0.011702	-0.035339
Pf3D7_02_v3	779168	782382	Pf3D7_02_v3	PF3D7_0219600	replication factor C subunit 1, putative	-0.111142	-0.136807	-0.082903	0.052836	-0.000477
Pf3D7_02_v3	783473	785078	Pf3D7_02_v3	PF3D7_0219700	Plasmodium exported protein (PHISTc), unknown function	-0.223165	-0.037499	-0.076829	0.089786	-0.071516
Pf3D7_02_v3	786620	788190	Pf3D7_02_v3	PF3D7_0219800	Plasmodium exported protein (PHISTc), unknown function	-0.056498	-0.005356	0.009691	0.178504	0.066877
Pf3D7_02_v3	791214	792631	Pf3D7_02_v3	PF3D7_0219900	Plasmodium exported protein, unknown function	-0.149226	-0.029733	-0.029458	-0.270602	-0.132533
Pf3D7_02_v3	796502	801836	Pf3D7_02_v3	PF3D7_0220000	liver stage antigen 3	0.007386	0.064689	0.039071	0.009382	0.019206
Pf3D7_02_v3	804270	807991	Pf3D7_02_v3	PF3D7_0220100	DnaJ protein, putative	0.051298	-0.059152	-0.130746	0.367491	0.178864
Pf3D7_02_v3	809261	810548	Pf3D7_02_v3	PF3D7_0220200	Plasmodium exported protein, unknown function	0.006768	-0.049576	-0.06606	0.216602	0.07104
Pf3D7_02_v3	813577	814904	Pf3D7_02_v3	PF3D7_0220300	Plasmodium exported protein, unknown function	-0.176474	0.016012	-0.03857	-0.179956	-0.109887
Pf3D7_02_v3	820179	822791	Pf3D7_02_v3	PF3D7_0220400	DnaJ protein, putative, pseudogene	-0.04466	-0.120388	-0.150783	0.053593	-0.050551
Pf3D7_02_v3	823575	825114	Pf3D7_02_v3	PF3D7_0220500	Plasmodium exported protein (hyp2), unknown function	0.018569	0.018423	0.043802	0.340194	0.141975
Pf3D7_02_v3	830939	832255	Pf3D7_02_v3	PF3D7_0220600	Plasmodium exported protein (hyp9), unknown function	0.006113	-0.177584	-0.052613	0.135684	0.066451
Pf3D7_02_v3	833555	834938	Pf3D7_02_v3	PF3D7_0220700	Plasmodium exported protein (hyp9), unknown function	-0.105856	0.124863	-0.026136	0.232942	0.23091
Pf3D7_02_v3	838593	844366	Pf3D7_02_v3	PF3D7_0220800	cytoadherence linked asexual protein 2	-0.084394	0.063614	0.005518	0.114094	0.020035
Pf3D7_02_v3	845350	846625	Pf3D7_02_v3	PF3D7_0220900	Plasmodium exported protein, unknown function, pseudogene	0.075474	0.036082	-0.017536	-0.001721	0.010084
Pf3D7_02_v3	847842	849369	Pf3D7_02_v3	PF3D7_0221000	Plasmodium exported protein, unknown function	0.00855	-0.111437	-0.040349	0.227586	0.113524
Pf3D7_02_v3	850802	852212	Pf3D7_02_v3	PF3D7_0221100	Plasmodium exported protein, unknown function, pseudogene	-0.111537	-0.028015	-0.09432	0.212322	-0.025686
Pf3D7_02_v3	854716	855988	Pf3D7_02_v3	PF3D7_0221200	Plasmodium exported protein (hyp15), unknown function	-0.185968	-0.028859	-0.056486	0.116014	-0.01518
Pf3D7_02_v3	857317	858925	Pf3D7_02_v3	PF3D7_0221300	Plasmodium exported protein, unknown function, pseudogene	-0.036356	-0.049482	-0.021496	0.27604	0.118518
Pf3D7_02_v3	860216	861754	Pf3D7_02_v3	PF3D7_0221400	stevor	-0.042727	-0.056581	-0.098095	0.064447	0.008207
Pf3D7_02_v3	862829	864092	Pf3D7_02_v3	PF3D7_0221500	Pfmc-2TM Maurer's cleft two transmembrane protein, pseudogene	-0.072773	0.014212	-0.08927	0.11217	0.00838
Pf3D7_02_v3	865666	866788	Pf3D7_02_v3	PF3D7_0221600	Plasmodium exported protein, unknown function, pseudogene	-0.133601	-0.065767	-0.124947	0.445253	0.16877
Pf3D7_02_v3	869258	871374	Pf3D7_02_v3	PF3D7_0221700	Plasmodium exported protein, unknown function	0.165267	0.075749	0.073643	-0.015616	0.063217
Pf3D7_02_v3	872881	873569	Pf3D7_02_v3	PF3D7_0221800	hypothetical protein	0.106207	-0.0233	-0.059905	0.194728	0.080174
Pf3D7_02_v3	873667	875428	Pf3D7_02_v3	PF3D7_0221900	erythrocyte membrane protein 1 (PfEMP1), pseudogene	-0.008803	0.001887	-0.077856	0.389052	0.14952
Pf3D7_02_v3	886375	888052	Pf3D7_02_v3	PF3D7_0222400	rifin, pseudogene	0.005248	0.052838	0.099103	0.26726	0.135909
Pf3D7_02_v3	889410	890995	Pf3D7_02_v3	PF3D7_0222500	rifin	0.107086	0.086164	0.039195	0.113765	0.078252
Pf3D7_02_v3	895976	897670	Pf3D7_02_v3	PF3D7_0222700	rifin	0.162177	0.158907	0.019066	-0.417771	-0.267897
Pf3D7_02_v3	899180	900695	Pf3D7_02_v3	PF3D7_0222800	stevor	-0.043837	0.027719	0.014492	0.180918	0.00813
Pf3D7_02_v3	901244	903103	Pf3D7_02_v3	PF3D7_0222900	erythrocyte membrane protein 1 (PfEMP1), exon 2, pseudogene	-0.004449	-0.029486	0.028346	0.362868	0.151684
Pf3D7_02_v3	904301	906025	Pf3D7_02_v3	PF3D7_0223100	rifin	-0.060464	-0.011687	-0.037347	0.070411	-0.023668
Pf3D7_02_v3	916102	923898	Pf3D7_02_v3	PF3D7_0223500	erythrocyte membrane protein 1, PfEMP1	-0.11199	-0.021844	-0.089397	-0.9299	-0.50609
Pf3D7_03_v3	36715	44732	Pf3D7_03_v3	PF3D7_0300100	erythrocyte membrane protein 1, PfEMP1	-0.06138	-0.050958	-0.024923	-0.05641	-0.099524
Pf3D7_03_v3	61195	62964	Pf3D7_03_v3	PF3D7_0300700	rifin	0.030122	0.08855	0.084654	0.6729	0.327009
Pf3D7_03_v3	67678	68932	Pf3D7_03_v3	PF3D7_0300900	stevor-like	0.06113	0.020625	0.016247	-0.400681	-0.208458
Pf3D7_03_v3	69210	72169	Pf3D7_03_v3	PF3D7_0301000	acyl-CoA synthetase	0.088379	-0.100373	-0.080075	-0.105558	-0.103213
Pf3D7_03_v3	76244	77724	Pf3D7_03_v3	PF3D7_0301100	Plasmodium exported protein (hyp13), unknown function	0.175152	0.062664	0.071261	0.208917	0.1159
Pf3D7_03_v3	77945	80643	Pf3D7_03_v3	PF3D7_0301200	serine/threonine protein kinase, FIKK family	-0.012201	0.023051	0.057456	0.073162	-0.006547
Pf3D7_03_v3	81761	83765	Pf3D7_03_v3	PF3D7_0301300	epoxide hydrolase 1	-0.151473	0.026199	-0.023247	-0.125344	-0.084964
Pf3D7_03_v3	85055	86381	Pf3D7_03_v3	PF3D7_0301400	Plasmodium exported protein, unknown function	-0.033913	-0.11443	-0.084377	-0.060975	-0.081533
Pf3D7_03_v3	88000	89481	Pf3D7_03_v3	PF3D7_0301500	Plasmodium exported protein, unknown function	-0.017729	0.040472	-0.024648	-0.746133	-0.403537
Pf3D7_03_v3	90865	93713	Pf3D7_03_v3	PF3D7_0301600	Plasmodium exported protein (hyp1), unknown function	-0.298616	-0.198587	-0.094616	0.141488	-0.066508
Pf3D7_03_v3	96318	98157	Pf3D7_03_v3	PF3D7_0301700	Plasmodium exported protein, unknown function	-0.024266	-0.072331	0.014703	-0.179295	-0.068203
Pf3D7_03_v3	104075	105531	Pf3D7_03_v3	PF3D7_0301800	Plasmodium exported protein, unknown function	-0.23018	-0.091583	-0.108261	-0.295862	-0.201829
Pf3D7_03_v3	105663	107359	Pf3D7_03_v3	PF3D7_0301900	conserved protein, unknown function	-0.051493	-0.094617	-0.05164	-0.14496	-0.123352
Pf3D7_03_v3	107711	110130	Pf3D7_03_v3	PF3D7_0302000	pre-mRNA-splicing factor PRP46, putative	-0.066577	-0.041606	0.005625	0.114651	0.065908
Pf3D7_03_v3	113820	118336	Pf3D7_03_v3	PF3D7_0302100	serine/threonine protein kinase	0.0099	0.045706	0.04524	0.133333	0.109693
Pf3D7_03_v3	119208	124985	Pf3D7_03_v3	PF3D7_0302200	cytoadherence linked asexual protein 3.2	-0.025365	-0.018464	0.012914	0.174131	0.180658
Pf3D7_03_v3	125742	130485	Pf3D7_03_v3	PF3D7_0302300	erythrocyte membrane protein 1 (PfEMP1), pseudogene	-0.061229	-0.029182	-0.009591	0.388317	0.21471
Pf3D7_03_v3	132082	133752	Pf3D7_03_v3	PF3D7_0302400	unspecified product	0.02973	-0.02221	0.046462	0.138498	0.098842
Pf3D7_03_v3	135168	140910	Pf3D7_03_v3	PF3D7_0302500	cytoadherence linked asexual protein 3.1	-0.010124	0.016475	-0.024286	0.088617	-0.045919
Pf3D7_03_v3	141306	145903	Pf3D7_03_v3	PF3D7_0302600	ABC transporter B family member 4, putative	0.001171	-0.048774	-0.100164	-0.204098	-0.051771
Pf3D7_03_v3	146122	147306	Pf3D7_03_v3	PF3D7_0302700	CDGSH iron-sulfur domain-containing protein, putative	-0.066737	-0.052953	-0.06832	-0.049584	-0.09309
Pf3D7_03_v3	147796	149555	Pf3D7_03_v3	PF3D7_0302800	RNA-binding protein, putative	-0.085169	-0.008718	-0.062822	-0.039109	-0.049947
Pf3D7_03_v3	151918	156396	Pf3D7_03_v3	PF3D7_0302900	exportin-1, putative	0.05124	-0.013271	0.05066	0.009195	0.039653
Pf3D7_03_v3	159103	161954	Pf3D7_03_v3	PF3D7_0303000	N-ethylmaleimide-sensitive fusion protein	-0.025146	-0.052007	-0.00432	0.048501	0.024522
Pf3D7_03_v3	162528	167353	Pf3D7_03_v3	PF3D7_0303100	CLP1 P-loop domain-containing protein, putative	0.020522	0.067649	0.04044	0.181162	0.147591
Pf3D7_03_v3	169321	174550	Pf3D7_03_v3	PF3D7_0303200	HAD superfamily protein, putative	-0.010419	-0.141403	-0.031242	-0.05254	0.007484
Pf3D7_03_v3	174772	176049	Pf3D7_03_v3	PF3D7_0303300	DNA-directed RNA polymerases I, II, and III subunit RPABC2, putative	-0.100356	0.00464	0.010852	-0.017496	-0.000829
Pf3D7_03_v3	178170	181377	Pf3D7_03_v3	PF3D7_0303400	palmitoyltransferase DHHC1	-0.124786	-0.045014	-0.033457	0.053467	0.003839
Pf3D7_03_v3	182481	189661	Pf3D7_03_v3	PF3D7_0303500	spindle pole body protein, putative	0.076475	-0.077129	0.007395	-0.24028	0.036608
Pf3D7_03_v3	189930	190969	Pf3D7_03_v3	PF3D7_0303600	plasmoredoxin	-0.073079	-0.014537	-0.066536	-0.077798	-0.018679
Pf3D7_03_v3	190995	192841	Pf3D7_03_v3	PF3D7_0303700	lipoamide acyltransferase component of branched-chain alpha-keto acid dehydrogenase complex	-0.110974	-0.053814	-0.056345	0.214056	0.098211
Pf3D7_03_v3	194180	196390	Pf3D7_03_v3	PF3D7_0303800	IBR domain protein, putative	0.031224	0.111566	0.082319	0.038933	0.079216
Pf3D7_03_v3	196391	197688	Pf3D7_03_v3	PF3D7_0303900	phosphatidylethanolamine-binding protein, putative	0.02205	-0.035727	-0.050848	0.078209	0.076806
Pf3D7_03_v3	198292	201834	Pf3D7_03_v3	PF3D7_0304000	inner membrane complex protein 1a, putative	-0.094373	-0.08523	-0.039854	0.067317	0.025195
Pf3D7_03_v3	204292	206369	Pf3D7_03_v3	PF3D7_0304100	inner membrane complex protein 1e, putative	0.031047	0.044357	0.016171	0.344252	0.213821
Pf3D7_03_v3	207092	209169	Pf3D7_03_v3	PF3D7_0304200	EH domain-containing protein	-0.198673	-0.124419	-0.118844	-0.070786	-0.156721
Pf3D7_03_v3	212033	216822	Pf3D7_03_v3	PF3D7_0304300	conserved Plasmodium protein, unknown function	-0.042779	-0.108337	-0.012987	0.032536	-0.046242
Pf3D7_03_v3	217691	218739	Pf3D7_03_v3	PF3D7_0304400	60S ribosomal protein L44	0.06189	0.087346	0.049719	0.005386	0.011721
Pf3D7_03_v3	218867	220122	Pf3D7_03_v3	PF3D7_0304500	1-cys-glutaredoxin-like protein-1	-0.025614	-0.017043	0.044986	-0.031811	-0.038589
Pf3D7_03_v3	221073	222766	Pf3D7_03_v3	PF3D7_0304600	circumsporozoite (CS) protein	-0.073451	-0.032981	-0.093183	-0.016236	-0.053968
Pf3D7_03_v3	223910	226043	Pf3D7_03_v3	PF3D7_0304700	conserved Plasmodium protein, unknown function	-0.103541	-0.021814	-0.083599	-0.145914	-0.016192
Pf3D7_03_v3	226807	231595	Pf3D7_03_v3	PF3D7_0304800	conserved Plasmodium membrane protein, unknown function	-0.052498	0.013873	-0.02808	0.1358	-0.012616
Pf3D7_03_v3	231596	232555	Pf3D7_03_v3	PF3D7_0304900	conserved protein, unknown function	-0.055888	-0.075421	-0.04634	-0.027309	-0.022524
Pf3D7_03_v3	233808	235584	Pf3D7_03_v3	PF3D7_0305000	elongation factor Ts	-0.099797	-0.118714	-0.113695	-0.088802	-0.097118
Pf3D7_03_v3	236084	248520	Pf3D7_03_v3	PF3D7_0305100	conserved Plasmodium protein, unknown function	-0.117013	-0.05685	-0.022335	-0.05104	-0.095524
Pf3D7_03_v3	250992	254911	Pf3D7_03_v3	PF3D7_0305200	conserved Plasmodium protein, unknown function	0.050616	-0.128252	0.059679	-0.030585	-0.056318
Pf3D7_03_v3	255026	258666	Pf3D7_03_v3	PF3D7_0305300	conserved Plasmodium membrane protein, unknown function	0.006821	-0.056609	-0.007704	0.075422	0.02738
Pf3D7_03_v3	260082	261285	Pf3D7_03_v3	PF3D7_0305400	conserved protein, unknown function	-0.023367	-0.012768	0.008287	0.01553	-0.055168
Pf3D7_03_v3	261286	273536	Pf3D7_03_v3	PF3D7_0305500	conserved Plasmodium protein, unknown function	0.086638	-0.06523	-0.023075	-0.061234	-0.037032
Pf3D7_03_v3	275614	277967	Pf3D7_03_v3	PF3D7_0305600	DNA-(apurinic or apyrimidinic site) lyase, putative	-0.041326	-0.04714	-0.009919	0.249552	0.132587
Pf3D7_03_v3	278706	280078	Pf3D7_03_v3	PF3D7_0305700	ubiquitin-conjugating enzyme E2, putative	-0.242525	-0.050443	-0.113053	-0.504892	-0.211443
Pf3D7_03_v3	281666	285419	Pf3D7_03_v3	PF3D7_0305800	P-loop containing nucleoside triphosphate hydrolase, putative	-0.013067	-0.086434	-0.121538	-0.044781	-0.079652
Pf3D7_03_v3	286656	287569	Pf3D7_03_v3	PF3D7_0306000	conserved protein, unknown function	0.088419	0.023954	-0.068409	-0.22254	-0.1588
Pf3D7_03_v3	288387	290997	Pf3D7_03_v3	PF3D7_0306100	conserved Plasmodium protein, unknown function	0.065659	0.028707	-0.036744	-0.036762	0.037498
Pf3D7_03_v3	292693	294798	Pf3D7_03_v3	PF3D7_0306200	activator of Hsp90 ATPase	0.105461	0.004107	0.013781	0.057355	0.075935
Pf3D7_03_v3	294857	296344	Pf3D7_03_v3	PF3D7_0306300	glutaredoxin 1	0.10808	0.009511	-0.027135	0.065941	0.021574
Pf3D7_03_v3	298267	300728	Pf3D7_03_v3	PF3D7_0306400	FAD-dependent glycerol-3-phosphate dehydrogenase, putative	0.03349	0.040343	-0.055258	-0.017035	0.037824
Pf3D7_03_v3	300757	302156	Pf3D7_03_v3	PF3D7_0306500	cytochrome c oxidase subunit ApiCOX35, putative	-0.035646	-0.041871	0.004271	-0.29275	-0.106837
Pf3D7_03_v3	302576	303333	Pf3D7_03_v3	PF3D7_0306600	ATP synthase-associated protein, putative	-0.212134	-0.091431	0.000283	-0.075795	-0.010431
Pf3D7_03_v3	305858	308234	Pf3D7_03_v3	PF3D7_0306800	T-complex protein 1 subunit beta	-0.105934	-0.084864	-0.102833	0.014338	-0.00762
Pf3D7_03_v3	310402	312055	Pf3D7_03_v3	PF3D7_0306900	40S ribosomal protein S23, putative	0.024732	-0.046428	-0.026058	-0.081412	-0.048872
Pf3D7_03_v3	312443	313592	Pf3D7_03_v3	PF3D7_0307100	40S ribosomal protein S12, putative	-0.062202	0.03437	-0.026033	-0.292743	-0.128208
Pf3D7_03_v3	314726	316486	Pf3D7_03_v3	PF3D7_0307200	60S ribosomal protein L7, putative	0.000259	-0.066406	-0.066954	-0.095151	-0.121656
Pf3D7_03_v3	318554	320586	Pf3D7_03_v3	PF3D7_0307300	microtubule-associated protein RP/EB family, putative	0.029354	-0.000705	0.041385	-0.257308	-0.044254
Pf3D7_03_v3	320800	322412	Pf3D7_03_v3	PF3D7_0307400	ATP-dependent Clp protease proteolytic subunit	0.052898	-0.016164	0.004908	0.065135	0.041661
Pf3D7_03_v3	322683	325086	Pf3D7_03_v3	PF3D7_0307500	spindle and kinetochore-associated protein 2, putative	-0.040978	0.073643	0.084036	0.094796	0.098579
Pf3D7_03_v3	325672	328585	Pf3D7_03_v3	PF3D7_0307600	conserved Plasmodium protein, unknown function	-0.044646	0.001715	-0.024909	0.045381	0.074664
Pf3D7_03_v3	328586	335519	Pf3D7_03_v3	PF3D7_0307700	conserved Plasmodium protein, unknown function	-0.158904	0.020269	-0.052911	-0.070725	0.014821
Pf3D7_03_v3	336929	339528	Pf3D7_03_v3	PF3D7_0307800	conserved Plasmodium protein, unknown function	-0.013111	-0.020766	-0.016593	0.117842	0.000875
Pf3D7_03_v3	339778	351902	Pf3D7_03_v3	PF3D7_0307900	conserved Plasmodium protein, unknown function	0.105243	0.044273	0.099293	0.144982	0.11724
Pf3D7_03_v3	353299	355295	Pf3D7_03_v3	PF3D7_0308000	DNA polymerase delta small subunit, putative	0.012579	0.074058	-0.038467	-0.09342	-0.015506
Pf3D7_03_v3	356069	361704	Pf3D7_03_v3	PF3D7_0308100	zinc finger protein, putative	-0.082414	0.055573	-0.010891	0.098878	0.076109
Pf3D7_03_v3	362092	364483	Pf3D7_03_v3	PF3D7_0308200	T-complex protein 1 subunit eta	0.013155	0.00271	0.029259	-0.041805	0.004289
Pf3D7_03_v3	365409	366922	Pf3D7_03_v3	PF3D7_0308300	conserved Plasmodium protein, unknown function	-0.0371	-0.003478	0.003223	0.196622	0.111348
Pf3D7_03_v3	369675	371039	Pf3D7_03_v3	PF3D7_0308500	activator of Hsp90 ATPase, putative	-0.005302	0.014653	0.016023	-0.192145	-0.030831
Pf3D7_03_v3	372382	374480	Pf3D7_03_v3	PF3D7_0308600	pre-mRNA-processing factor 19, putative	-0.042052	0.04489	0.029377	0.116015	0.089475
Pf3D7_03_v3	375556	377687	Pf3D7_03_v3	PF3D7_0308700	conserved protein, unknown function	-0.078158	-0.015712	0.001621	0.031187	-0.009714
Pf3D7_03_v3	377795	378767	Pf3D7_03_v3	PF3D7_0308800	conserved protein, unknown function	-0.008352	0.134606	0.055103	0.060387	-0.011502
Pf3D7_03_v3	378880	383540	Pf3D7_03_v3	PF3D7_0308900	splicing factor 3B subunit 1, putative	-0.051126	-0.033059	-0.045435	-0.025381	-0.029671
Pf3D7_03_v3	384125	387049	Pf3D7_03_v3	PF3D7_0309000	dual specificity protein phosphatase	0.010515	0.011163	0.004498	0.082397	0.012089
Pf3D7_03_v3	387050	388723	Pf3D7_03_v3	PF3D7_0309100	conserved Plasmodium protein, unknown function	0.008358	-0.084111	-0.065189	0.083431	0.026292
Pf3D7_03_v3	388887	394854	Pf3D7_03_v3	PF3D7_0309200	serine/threonine protein kinase, putative	0.051228	0.000742	-0.03728	-0.065391	-0.020455
Pf3D7_03_v3	397399	400766	Pf3D7_03_v3	PF3D7_0309300	N2227-like protein, putative	0.041979	0.040751	-0.031041	0.069381	0.041094
Pf3D7_03_v3	402683	405690	Pf3D7_03_v3	PF3D7_0309500	asparagine synthetase [glutamine-hydrolyzing], putative	-0.011438	0.048613	-0.060749	0.06423	0.08335
Pf3D7_03_v3	407730	408568	Pf3D7_03_v3	PF3D7_0309600	60S acidic ribosomal protein P2	0.000806	-0.004643	-0.044665	0.03348	-0.005296
Pf3D7_03_v3	408852	411178	Pf3D7_03_v3	PF3D7_0309700	SECIS-binding protein 2, putative	-0.055888	0.02494	-0.034573	0.162431	0.079675
Pf3D7_03_v3	411839	413998	Pf3D7_03_v3	PF3D7_0309800	YTH domain-containing protein, putative	-0.034072	-0.026739	-0.020248	0.044387	0.016923
Pf3D7_03_v3	413999	419923	Pf3D7_03_v3	PF3D7_0309900	conserved Plasmodium protein, unknown function	-0.040351	-0.010118	-0.031207	0.083246	0.024386
Pf3D7_03_v3	420447	421765	Pf3D7_03_v3	PF3D7_0310000	50S ribosomal protein L9, apicoplast, putative	-0.128366	-0.028034	-0.051776	0.023813	-0.04542
Pf3D7_03_v3	422129	424930	Pf3D7_03_v3	PF3D7_0310100	calcium-dependent protein kinase 3	0.086142	0.079096	0.056652	0.138537	0.127885
Pf3D7_03_v3	427040	441192	Pf3D7_03_v3	PF3D7_0310200	phd finger protein, putative	-0.051417	0.025038	0.015817	0.051998	0.008505
Pf3D7_03_v3	442470	446707	Pf3D7_03_v3	PF3D7_0310300	phosphoglycerate mutase, putative	-0.120238	0.078075	0.078303	-0.007552	-0.019937
Pf3D7_03_v3	447250	451634	Pf3D7_03_v3	PF3D7_0310400	parasite-infected erythrocyte surface protein	0.108814	0.059914	0.025834	0.391766	0.224451
Pf3D7_03_v3	452047	459356	Pf3D7_03_v3	PF3D7_0310500	ATP-dependent RNA helicase DHX57, putative	0.135677	0.064444	0.020163	-0.008568	0.059127
Pf3D7_03_v3	460925	462277	Pf3D7_03_v3	PF3D7_0310600	eukaryotic translation initiation factor 3 subunit K, putative, unspecified product	-0.031566	0.087549	0.072193	0.142085	0.051959
Pf3D7_03_v3	463076	464468	Pf3D7_03_v3	PF3D7_0310700	trafficking protein particle complex subunit 4, putative	-0.00481	0.004927	0.021882	0.21082	0.069294
Pf3D7_03_v3	464469	465241	Pf3D7_03_v3	PF3D7_0310800	conserved Plasmodium protein, unknown function	0.070345	0.013623	0.056804	0.056934	0.041392
Pf3D7_03_v3	465835	468695	Pf3D7_03_v3	PF3D7_0310900	conserved Plasmodium protein, unknown function	0.076302	0.013978	0.046189	-0.132905	-0.04744
Pf3D7_03_v3	469037	470368	Pf3D7_03_v3	PF3D7_0311000	conserved Plasmodium protein, unknown function	0.069939	-0.007548	0.044831	0.062215	-0.007163
Pf3D7_03_v3	470610	473411	Pf3D7_03_v3	PF3D7_0311100	pre-mRNA splicing factor, putative	0.056992	0.015715	0.003064	0.178464	0.05787
Pf3D7_03_v3	474538	479336	Pf3D7_03_v3	PF3D7_0311200	valine--tRNA ligase, putative	0.016944	-0.006623	-0.06345	-0.017406	-0.029677
Pf3D7_03_v3	479872	483703	Pf3D7_03_v3	PF3D7_0311300	phosphatidylinositol 3- and 4-kinase, putative	0.146471	0.041334	0.057041	0.15693	0.163119
Pf3D7_03_v3	488554	496760	Pf3D7_03_v3	PF3D7_0311400	kinase-related protein PKRP, putative	0.054593	0.012831	0.019945	0.045656	-0.013541
Pf3D7_03_v3	499352	502525	Pf3D7_03_v3	PF3D7_0311600	dolichyl-diphosphooligosaccharide--protein glycosyltransferase subunit OST1, putative	0.051541	-0.022922	-0.032552	0.11691	0.075141
Pf3D7_03_v3	502526	506098	Pf3D7_03_v3	PF3D7_0311700	plasmepsin VI	0.214074	0.054313	0.122346	-0.057975	0.10452
Pf3D7_03_v3	506405	509068	Pf3D7_03_v3	PF3D7_0311800	ATP synthase F0 subunit d-like protein, putative	0.086187	0.014034	0.03502	0.242859	0.083768
Pf3D7_03_v3	509069	511847	Pf3D7_03_v3	PF3D7_0311900	heptatricopeptide repeat-containing protein, putative	0.066851	-0.007754	0.022249	0.021718	0.032407
Pf3D7_03_v3	511880	513201	Pf3D7_03_v3	PF3D7_0312000	conserved protein, unknown function	-0.042559	0.014862	-0.002351	-0.061682	-0.146406
Pf3D7_03_v3	513502	516512	Pf3D7_03_v3	PF3D7_0312100	E3 ubiquitin-protein ligase	0.162649	0.109699	0.068525	0.275626	0.168852
Pf3D7_03_v3	516543	520753	Pf3D7_03_v3	PF3D7_0312200	tetratricopeptide repeat protein, putative	0.026838	-0.013041	0.032581	0.144171	0.008319
Pf3D7_03_v3	521719	523133	Pf3D7_03_v3	PF3D7_0312300	26S proteasome regulatory subunit RPN12, putative	-0.090544	-0.212658	-0.090239	-0.337821	-0.064507
Pf3D7_03_v3	523904	526689	Pf3D7_03_v3	PF3D7_0312400	glycogen synthase kinase 3	0.024141	0.0156	0.076919	-0.089556	-0.021376
Pf3D7_03_v3	528787	530994	Pf3D7_03_v3	PF3D7_0312500	major facilitator superfamily-related transporter, putative	-0.005354	-0.051523	-0.02005	-0.208931	-0.174381
Pf3D7_03_v3	533989	535488	Pf3D7_03_v3	PF3D7_0312800	60S ribosomal protein L26, putative	-0.042051	-0.008942	0.043284	0.057928	-0.026825
Pf3D7_03_v3	535793	537447	Pf3D7_03_v3	PF3D7_0312900	hypothetical protein	0.033887	-0.015671	0.061444	0.169607	0.10678
Pf3D7_03_v3	537448	539054	Pf3D7_03_v3	PF3D7_0313000	conserved Plasmodium protein, unknown function	0.010987	-0.051913	0.064039	0.165398	0.152953
Pf3D7_03_v3	539493	543025	Pf3D7_03_v3	PF3D7_0313100	ubiquitin-protein ligase, putative	-0.190919	-0.07902	-0.057044	0.148177	0.022787
Pf3D7_03_v3	543026	543998	Pf3D7_03_v3	PF3D7_0313200	conserved protein, unknown function	-0.039173	-0.100723	-0.045704	0.007473	-0.077361
Pf3D7_03_v3	543999	545444	Pf3D7_03_v3	PF3D7_0313300	YGGT family protein, putative	0.062295	0.052811	0.120953	0.050415	-0.010425
Pf3D7_03_v3	545578	548432	Pf3D7_03_v3	PF3D7_0313400	conserved Plasmodium protein, unknown function	0.200383	0.097638	0.138939	0.087573	0.134195
Pf3D7_03_v3	548468	551703	Pf3D7_03_v3	PF3D7_0313500	Ras-like G protein	0.171492	0.124919	0.117485	0.15769	0.106053
Pf3D7_03_v3	551751	554828	Pf3D7_03_v3	PF3D7_0313600	conserved Plasmodium protein, unknown function	0.016729	-0.077914	-0.048866	-0.071396	-0.063267
Pf3D7_03_v3	554829	558934	Pf3D7_03_v3	PF3D7_0313700	conserved Plasmodium protein, unknown function, unspecified product	0.039704	0.015528	-0.011791	-0.032351	0.039369
Pf3D7_03_v3	559084	562309	Pf3D7_03_v3	PF3D7_0313800	conserved Plasmodium protein, unknown function	0.155276	-0.044258	0.011964	0.132047	0.000583
Pf3D7_03_v3	562310	565906	Pf3D7_03_v3	PF3D7_0313900	conserved Plasmodium protein, unknown function	0.003651	-0.018719	0.002998	0.163696	0.022038
Pf3D7_03_v3	566997	569079	Pf3D7_03_v3	PF3D7_0314000	HSP20-like chaperone, putative	-0.084012	-0.107393	-0.050505	0.023653	-0.019885
Pf3D7_03_v3	569080	571301	Pf3D7_03_v3	PF3D7_0314100	vesicle transport v-SNARE protein, putative	0.042473	0.02734	0.016336	0.076009	0.050288
Pf3D7_03_v3	572416	576915	Pf3D7_03_v3	PF3D7_0314200	conserved Plasmodium protein, unknown function	-0.061907	-0.065021	-0.121289	0.119747	-0.098824
Pf3D7_03_v3	576916	578616	Pf3D7_03_v3	PF3D7_0314300	DER1-like protein	-0.311122	-0.03654	-0.006486	-0.040583	-0.07088
Pf3D7_03_v3	579289	580715	Pf3D7_03_v3	PF3D7_0314400	serine/threonine protein phosphatase 6, putative	-0.019323	0.025227	-0.01069	0.115843	0.058238
Pf3D7_03_v3	583976	585418	Pf3D7_03_v3	PF3D7_0314500	conserved Plasmodium protein, unknown function	-0.113507	-0.044662	-0.070508	0.001091	-0.05843
Pf3D7_03_v3	586305	587581	Pf3D7_03_v3	PF3D7_0314600	conserved protein, unknown function	-0.043892	-0.115783	-0.065095	0.038478	-0.01982
Pf3D7_03_v3	588752	592797	Pf3D7_03_v3	PF3D7_0314700	RING finger protein RNF1	0.120747	-0.000742	0.072776	0.052071	0.053116
Pf3D7_03_v3	604345	608181	Pf3D7_03_v3	PF3D7_0314800	conserved Plasmodium protein, unknown function	0.083201	0.111155	0.125581	-0.031059	0.110868
Pf3D7_03_v3	608633	610968	Pf3D7_03_v3	PF3D7_0314900	conserved Plasmodium membrane protein, unknown function	0.159044	0.077	0.058811	0.138139	0.133284
Pf3D7_03_v3	611084	612264	Pf3D7_03_v3	PF3D7_0315000	zinc finger protein, putative	-0.029202	-0.003099	0.001648	0.099961	0.032164
Pf3D7_03_v3	612489	613672	Pf3D7_03_v3	PF3D7_0315100	eukaryotic translation initiation factor 4E	-0.228792	-0.05459	-0.112255	-0.140063	-0.215607
Pf3D7_03_v3	616222	623066	Pf3D7_03_v3	PF3D7_0315200	circumsporozoite- and TRAP-related protein	0.033738	0.074076	0.100479	0.148378	0.049088
Pf3D7_03_v3	623196	630485	Pf3D7_03_v3	PF3D7_0315300	conserved Plasmodium protein, unknown function	-0.008144	0.035271	0.057029	0.136367	0.036803
Pf3D7_03_v3	630486	631631	Pf3D7_03_v3	PF3D7_0315400	conserved Plasmodium protein, unknown function	-0.069553	0.006069	0.066722	0.033422	0.073414
Pf3D7_03_v3	632596	633794	Pf3D7_03_v3	PF3D7_0315500	mitochondrial ribosomal protein L29/L47 precursor, putative	-0.221619	0.053866	0.011721	-0.023548	-0.026328
Pf3D7_03_v3	635336	637712	Pf3D7_03_v3	PF3D7_0315600	zinc finger protein, putative	-0.066112	0.094092	0.06678	-0.058125	-0.076049
Pf3D7_03_v3	638033	641394	Pf3D7_03_v3	PF3D7_0315700	conserved Plasmodium membrane protein, unknown function	0.136636	0.089677	0.154077	0.360697	0.279841
Pf3D7_03_v3	641395	642829	Pf3D7_03_v3	PF3D7_0315800	zinc finger protein, putative	0.05587	0.012623	0.048202	-0.117519	-0.098467
Pf3D7_03_v3	643936	645518	Pf3D7_03_v3	PF3D7_0315900	conserved Plasmodium protein, unknown function	0.003426	0.019671	0.003563	0.034214	-0.021037
Pf3D7_03_v3	645671	647094	Pf3D7_03_v3	PF3D7_0316000	microneme associated antigen	-0.123928	0.029835	0.001955	0.107612	0.026475
Pf3D7_03_v3	648385	649690	Pf3D7_03_v3	PF3D7_0316100	mitochondrial ribosomal protein L27 precursor, putative	-0.096773	0.030648	0.002234	0.041298	-0.005296
Pf3D7_03_v3	649691	657497	Pf3D7_03_v3	PF3D7_0316200	conserved Plasmodium protein, unknown function	0.014629	0.022898	-0.003232	0.088484	0.050733
Pf3D7_03_v3	658022	661884	Pf3D7_03_v3	PF3D7_0316300	inorganic pyrophosphatase, inorganic pyrophosphatase, putative	0.103297	0.076424	0.090959	-0.06665	-0.025885
Pf3D7_03_v3	661885	665402	Pf3D7_03_v3	PF3D7_0316400	conserved protein, unknown function	-0.064034	-0.041977	-0.056403	-0.34292	-0.166586
Pf3D7_03_v3	666756	668641	Pf3D7_03_v3	PF3D7_0316500	kinetochore protein NUF2, putative	0.071407	0.026771	0.020401	-0.01054	-0.015208
Pf3D7_03_v3	669052	671123	Pf3D7_03_v3	PF3D7_0316600	formate-nitrite transporter	-0.029385	0.01802	0.023014	-0.009578	0.02385
Pf3D7_03_v3	674208	675886	Pf3D7_03_v3	PF3D7_0316700	protein YOP1, putative	-0.075849	0.017019	0.027678	0.100273	-0.009172
Pf3D7_03_v3	677592	678724	Pf3D7_03_v3	PF3D7_0316800	40S ribosomal protein S15A, putative	-0.004884	0.056458	0.094414	0.061651	0.108121
Pf3D7_03_v3	678984	681527	Pf3D7_03_v3	PF3D7_0316900	E3 ubiquitin-protein ligase, putative	-0.043755	0.012175	0.058247	0.10669	0.032581
Pf3D7_03_v3	682545	683935	Pf3D7_03_v3	PF3D7_0317000	proteasome subunit alpha type-3, putative	-0.061285	-0.05386	-0.06984	0.045811	-0.016213
Pf3D7_03_v3	686032	689732	Pf3D7_03_v3	PF3D7_0317100	6-cysteine protein	-0.013164	0.064988	0.05768	-0.039495	-0.003663
Pf3D7_03_v3	689904	695065	Pf3D7_03_v3	PF3D7_0317200	cdc2-related protein kinase 4	-0.03386	-0.04151	-0.039374	-0.037376	-0.114721
Pf3D7_03_v3	699294	709978	Pf3D7_03_v3	PF3D7_0317300	conserved Plasmodium protein, unknown function	-0.131986	0.052737	0.01627	-0.019699	-0.0737
Pf3D7_03_v3	712003	714332	Pf3D7_03_v3	PF3D7_0317400	DNA replication complex GINS protein, putative	-0.022207	0.028658	0.045916	0.116495	0.079297
Pf3D7_03_v3	716273	722081	Pf3D7_03_v3	PF3D7_0317500	kinesin-5	0.116215	0.097288	0.123271	0.098706	0.061787
Pf3D7_03_v3	724765	726380	Pf3D7_03_v3	PF3D7_0317600	40S ribosomal protein S11, putative	0.061935	0.145174	0.13091	0.203495	0.071177
Pf3D7_03_v3	728009	738140	Pf3D7_03_v3	PF3D7_0317700	CPSF (cleavage and polyadenylation specific factor), subunit A, putative	-3.9e-05	-0.042154	-0.036188	0.152601	0.047799
Pf3D7_03_v3	738141	739132	Pf3D7_03_v3	PF3D7_0317800	26S proteasome non-ATPase regulatory subunit 9, putative	0.116184	0.080823	0.107797	0.038876	0.145019
Pf3D7_03_v3	739178	741962	Pf3D7_03_v3	PF3D7_0317900	conserved protein, unknown function	-0.016103	0.043167	0.046178	0.147912	0.087691
Pf3D7_03_v3	741963	743049	Pf3D7_03_v3	PF3D7_0318000	conserved Plasmodium protein, unknown function	-0.056701	-0.031736	-0.017416	0.070619	0.014291
Pf3D7_03_v3	743679	745303	Pf3D7_03_v3	PF3D7_0318100	stomatin-like protein, putative	-0.073669	0.051669	0.032027	-0.056073	-0.02688
Pf3D7_03_v3	748215	756088	Pf3D7_03_v3	PF3D7_0318200	DNA-directed RNA polymerase II subunit RPB1	-0.013405	0.081463	0.063771	0.170706	0.099006
Pf3D7_03_v3	756241	760542	Pf3D7_03_v3	PF3D7_0318300	conserved Plasmodium protein, unknown function	0.018994	0.05681	0.018037	0.119744	0.065216
Pf3D7_03_v3	761443	765689	Pf3D7_03_v3	PF3D7_0318400	conserved Plasmodium protein, unknown function	0.002253	0.103155	0.059431	0.437353	0.257633
Pf3D7_03_v3	767565	782936	Pf3D7_03_v3	PF3D7_0318500	conserved Plasmodium protein, unknown function	0.094952	0.125774	0.174666	0.153825	0.136222
Pf3D7_03_v3	782937	786415	Pf3D7_03_v3	PF3D7_0318600	cleavage and polyadenylation specificity factor, putative	0.007667	0.088024	-0.002115	0.026874	-0.020966
Pf3D7_03_v3	788203	789062	Pf3D7_03_v3	PF3D7_0318700	conserved Plasmodium protein, unknown function	0.073598	0.050351	0.081717	0.151409	0.058668
Pf3D7_03_v3	789608	791558	Pf3D7_03_v3	PF3D7_0318800	triosephosphate isomerase, putative	0.054943	-0.003708	-0.069639	0.193857	0.060438
Pf3D7_03_v3	791590	793731	Pf3D7_03_v3	PF3D7_0318900	conserved protein, unknown function	0.058096	0.082609	-0.020942	0.212031	0.095006
Pf3D7_03_v3	795327	801421	Pf3D7_03_v3	PF3D7_0319000	P-type ATPase, putative	-0.022359	0.065094	-0.009745	0.240756	0.025109
Pf3D7_03_v3	802010	802833	Pf3D7_03_v3	PF3D7_0319100	E3 ubiquitin-protein ligase RBX1, putative	-0.016858	0.029592	0.026251	0.12241	0.092846
Pf3D7_03_v3	803342	806562	Pf3D7_03_v3	PF3D7_0319200	CCR4 domain-containing protein 4, putative	-0.018217	0.085977	0.082538	0.323481	0.214988
Pf3D7_03_v3	807027	808109	Pf3D7_03_v3	PF3D7_0319300	ubiquitin-conjugating enzyme E2, putative	0.048019	0.041263	-0.008294	0.078572	0.030484
Pf3D7_03_v3	809831	814422	Pf3D7_03_v3	PF3D7_0319400	kinesin-8, putative	-0.048754	0.046785	0.019751	0.075141	0.035188
Pf3D7_03_v3	815319	817105	Pf3D7_03_v3	PF3D7_0319500	RNA-binding protein, putative	-0.165369	-0.009108	0.019767	0.028738	-0.093531
Pf3D7_03_v3	817663	818945	Pf3D7_03_v3	PF3D7_0319600	elongation factor 1-delta, putative	-0.010463	0.096395	0.043926	-0.056329	0.049361
Pf3D7_03_v3	820458	830939	Pf3D7_03_v3	PF3D7_0319700	ABC transporter I family member 1, putative	-0.082208	0.044863	0.057631	0.045297	0.029727
Pf3D7_03_v3	830940	832759	Pf3D7_03_v3	PF3D7_0319800	conserved Plasmodium protein, unknown function	-0.080877	-0.013631	0.047503	0.045805	0.063771
Pf3D7_03_v3	833583	835027	Pf3D7_03_v3	PF3D7_0319900	conserved protein, unknown function	-0.081747	-0.027273	0.052561	0.149557	0.084881
Pf3D7_03_v3	837057	838521	Pf3D7_03_v3	PF3D7_0320000	protein phosphatase inhibitor 2	0.011884	0.024871	0.021654	0.106203	0.094547
Pf3D7_03_v3	840112	842008	Pf3D7_03_v3	PF3D7_0320100	protein transport protein SEC22	0.074448	0.026429	0.048507	0.262452	0.154565
Pf3D7_03_v3	842289	844540	Pf3D7_03_v3	PF3D7_0320200	CPW-WPC family protein	-0.091876	0.021943	0.028606	0.224542	0.081907
Pf3D7_03_v3	845463	847570	Pf3D7_03_v3	PF3D7_0320300	T-complex protein 1 subunit epsilon	-0.201279	-0.147109	-0.185138	-0.205328	-0.088927
Pf3D7_03_v3	847997	857754	Pf3D7_03_v3	PF3D7_0320400	oocyst capsule protein Cap380	0.065892	-0.025369	0.02746	-0.055064	-0.072216
Pf3D7_03_v3	860563	862352	Pf3D7_03_v3	PF3D7_0320500	nicotinamidase, putative	-0.038176	-0.094804	-0.051305	0.171881	0.034816
Pf3D7_03_v3	862491	864082	Pf3D7_03_v3	PF3D7_0320600	conserved protein, unknown function	0.012288	0.038775	0.016639	-0.042314	-0.031619
Pf3D7_03_v3	864764	866670	Pf3D7_03_v3	PF3D7_0320700	signal peptidase complex subunit 2	0.031854	0.064793	-0.019216	0.204292	0.058013
Pf3D7_03_v3	870567	872592	Pf3D7_03_v3	PF3D7_0320800	ATP-dependent RNA helicase DDX6	-0.134388	-0.014651	-0.024575	-0.042399	-0.033721
Pf3D7_03_v3	874963	876545	Pf3D7_03_v3	PF3D7_0320900	histone H2A.Z	0.047996	0.091082	0.032701	0.16954	0.105357
Pf3D7_03_v3	877485	879735	Pf3D7_03_v3	PF3D7_0321000	conserved protein, unknown function	-0.217631	-0.011538	-0.089009	0.039873	-0.0239
Pf3D7_03_v3	879736	885743	Pf3D7_03_v3	PF3D7_0321100	conserved Plasmodium protein, unknown function	0.009136	0.006086	0.040657	0.158526	0.195104
Pf3D7_03_v3	886712	889226	Pf3D7_03_v3	PF3D7_0321200	UDP-N-acetylglucosamine--dolichyl-phosphate N-acetylglucosaminephosphotransferase, putative	-0.039415	0.023415	-0.006118	0.077518	0.087876
Pf3D7_03_v3	889764	893014	Pf3D7_03_v3	PF3D7_0321300	conserved Plasmodium protein, unknown function	0.0387	0.091649	0.095741	0.123442	0.097759
Pf3D7_03_v3	894511	896329	Pf3D7_03_v3	PF3D7_0321400	protein kinase, putative	-0.014504	-0.031159	-0.069122	0.092554	0.048827
Pf3D7_03_v3	896330	900020	Pf3D7_03_v3	PF3D7_0321500	peptidase, putative	-0.120308	-0.019845	-0.033516	0.038071	0.031358
Pf3D7_03_v3	900607	903566	Pf3D7_03_v3	PF3D7_0321600	ATP-dependent RNA helicase DDX42, putative	-0.147142	-0.006365	-0.000735	0.135119	0.110338
Pf3D7_03_v3	903567	910368	Pf3D7_03_v3	PF3D7_0321700	conserved Plasmodium protein, unknown function	-0.066341	0.028706	-0.069035	0.294956	0.101122
Pf3D7_03_v3	912666	921286	Pf3D7_03_v3	PF3D7_0321800	WD repeat-containing protein, putative	-0.023526	0.075199	-0.005415	0.141801	0.117886
Pf3D7_03_v3	922724	928192	Pf3D7_03_v3	PF3D7_0321900	cyclic amine resistance locus protein	-0.019039	0.018522	0.032512	0.179558	0.122618
Pf3D7_03_v3	928394	929409	Pf3D7_03_v3	PF3D7_0322000	peptidyl-prolyl cis-trans isomerase	-0.017676	0.090083	0.032929	0.083974	0.090514
Pf3D7_03_v3	930390	932665	Pf3D7_03_v3	PF3D7_0322100	mRNA-capping enzyme subunit beta	-0.073361	0.027646	0.000201	0.161832	0.096596
Pf3D7_03_v3	932938	937256	Pf3D7_03_v3	PF3D7_0322200	conserved Plasmodium protein, unknown function	-0.144753	0.053534	-0.077625	0.041223	-0.023032
Pf3D7_03_v3	937962	940423	Pf3D7_03_v3	PF3D7_0322300	diacylglycerol O-acyltransferase	-0.088396	0.026536	-0.031547	0.141163	0.065411
Pf3D7_03_v3	942295	945419	Pf3D7_03_v3	PF3D7_0322400	regulator of initiation factor 2 (eIF2)	-0.124411	-0.016788	-0.041592	0.151542	0.06725
Pf3D7_03_v3	945420	947001	Pf3D7_03_v3	PF3D7_0322500	iron-sulfur assembly protein, putative	-0.069474	-0.060492	-0.015814	0.289922	0.185848
Pf3D7_03_v3	948124	952828	Pf3D7_03_v3	PF3D7_0322600	conserved Plasmodium protein, unknown function	-0.181571	0.047358	-0.020995	0.270825	0.17164
Pf3D7_03_v3	952829	962617	Pf3D7_03_v3	PF3D7_0322700	conserved Plasmodium protein, unknown function	-0.037757	-0.02064	-0.031219	0.130885	0.025232
Pf3D7_03_v3	963851	965378	Pf3D7_03_v3	PF3D7_0322800	conserved Plasmodium protein, unknown function	0.044441	-0.045679	-0.008037	0.114136	0.051281
Pf3D7_03_v3	965379	966752	Pf3D7_03_v3	PF3D7_0322900	40S ribosomal protein S3A, putative	-0.069055	-0.059289	-0.063542	0.032992	-0.043615
Pf3D7_03_v3	970916	976044	Pf3D7_03_v3	PF3D7_0323100	conserved Plasmodium protein, unknown function	0.005887	0.010754	-0.037793	0.209842	0.113988
Pf3D7_03_v3	976620	978445	Pf3D7_03_v3	PF3D7_0323200	conserved Plasmodium protein, unknown function	-0.133729	0.021787	-0.078735	0.182349	0.094868
Pf3D7_03_v3	978720	980488	Pf3D7_03_v3	PF3D7_0323300	conserved protein, unknown function	-0.022349	-0.031409	-0.046412	0.029687	-0.005571
Pf3D7_03_v3	980489	984216	Pf3D7_03_v3	PF3D7_0323400	Rh5 interacting protein	-0.115672	0.056957	0.056127	0.176263	0.116218
Pf3D7_03_v3	986015	987860	Pf3D7_03_v3	PF3D7_0323500	survival motor neuron-like protein	-0.216443	-0.085848	-0.076118	-0.051237	-0.059495
Pf3D7_03_v3	988381	991132	Pf3D7_03_v3	PF3D7_0323600	conserved Plasmodium protein, unknown function	-0.203207	0.02649	-0.110511	0.245325	0.12614
Pf3D7_03_v3	991294	993875	Pf3D7_03_v3	PF3D7_0323700	U4/U6.U5 tri-snRNP-associated protein 1, putative	0.06817	-0.055354	-0.060915	0.07778	0.073799
Pf3D7_03_v3	998399	1001832	Pf3D7_03_v3	PF3D7_0323800	conserved Plasmodium protein, unknown function	-0.131179	-0.061523	0.009213	0.112807	-0.038102
Pf3D7_03_v3	1002622	1004517	Pf3D7_03_v3	PF3D7_0323900	erythrocyte membrane protein 1 (PfEMP1), exon 2, pseudogene	-0.087721	-0.085175	-0.057017	0.233936	0.034959
Pf3D7_03_v3	1018624	1020223	Pf3D7_03_v3	PF3D7_0324500	rifin	0.037962	0.049047	0.075492	0.040793	0.103886
Pf3D7_03_v3	1023780	1025661	Pf3D7_03_v3	PF3D7_0324700	erythrocyte membrane protein 1 (PfEMP1), exon 2, pseudogene	0.143212	0.074755	0.060613	0.278529	0.217435
Pf3D7_03_v3	1027321	1029179	Pf3D7_03_v3	PF3D7_0324800	rifin	0.292824	0.132476	0.153345	0.097727	0.132678
Pf3D7_03_v3	1030572	1038504	Pf3D7_03_v3	PF3D7_0324900	erythrocyte membrane protein 1, PfEMP1	-0.151386	-0.112966	-0.16607	0.448796	0.081746
Pf3D7_04_v3	28456	37927	Pf3D7_04_v3	PF3D7_0400100	erythrocyte membrane protein 1, PfEMP1	-0.040675	0.007776	0.034859	0.205879	0.075975
Pf3D7_04_v3	38705	40404	Pf3D7_04_v3	PF3D7_0400200	erythrocyte membrane protein 1 (PfEMP1), exon 2, pseudogene	0.062551	0.067368	0.073674	0.212949	0.209478
Pf3D7_04_v3	41782	43624	Pf3D7_04_v3	PF3D7_0400300	rifin	-0.10075	-0.030855	-0.034252	-0.047846	0.002314
Pf3D7_04_v3	45305	57110	Pf3D7_04_v3	PF3D7_0400400	erythrocyte membrane protein 1, PfEMP1	-0.020752	-0.001966	-0.026104	0.089405	0.098203
Pf3D7_04_v3	59386	61175	Pf3D7_04_v3	PF3D7_0400500	rifin	-0.059885	-0.030762	-0.036787	0.237425	0.124382
Pf3D7_04_v3	69711	71363	Pf3D7_04_v3	PF3D7_0400900	rifin	-0.156853	-0.130768	-0.10268	-0.106789	-0.151559
Pf3D7_04_v3	73018	74590	Pf3D7_04_v3	PF3D7_0401000	rifin	-0.153859	-0.121701	-0.112488	0.092914	-0.031288
Pf3D7_04_v3	78943	80701	Pf3D7_04_v3	PF3D7_0401200	rifin	-0.166395	-0.073186	-0.111466	0.0391	0.022145
Pf3D7_04_v3	81997	83825	Pf3D7_04_v3	PF3D7_0401300	rifin	-0.093808	-0.0664	-0.061088	0.015867	-0.030459
Pf3D7_04_v3	85147	86858	Pf3D7_04_v3	PF3D7_0401400	rifin	-0.171927	-0.111428	-0.126808	-0.129125	-0.056528
Pf3D7_04_v3	88903	90434	Pf3D7_04_v3	PF3D7_0401500	stevor, pseudogene	-0.278823	-0.08832	-0.141708	-0.030904	-0.063534
Pf3D7_04_v3	92326	94059	Pf3D7_04_v3	PF3D7_0401600	rifin	-0.110411	-0.124907	-0.214168	-0.013716	0.010546
Pf3D7_04_v3	100434	102360	Pf3D7_04_v3	PF3D7_0401700	Plasmodium exported protein, unknown function, pseudogene	-0.096139	-0.117458	-0.112066	0.125189	-0.058331
Pf3D7_04_v3	103492	105853	Pf3D7_04_v3	PF3D7_0401800	Plasmodium exported protein (PHISTb), unknown function	0.024982	-0.023514	-0.007699	-0.069794	-0.051372
Pf3D7_04_v3	108130	111545	Pf3D7_04_v3	PF3D7_0401900	acyl-CoA synthetase	-0.141135	-0.0546	-0.043141	0.096407	0.040615
Pf3D7_04_v3	114351	116308	Pf3D7_04_v3	PF3D7_0402000	Plasmodium exported protein (PHISTa), unknown function	-0.247514	-0.142762	-0.124276	-0.255743	-0.276791
Pf3D7_04_v3	123338	125714	Pf3D7_04_v3	PF3D7_0402100	Plasmodium exported protein (PHISTb), unknown function	-0.029309	-0.042038	-0.02825	0.071685	-0.025026
Pf3D7_04_v3	127462	134718	Pf3D7_04_v3	PF3D7_0402200	surface-associated interspersed protein 4.1 (SURFIN 4.1), pseudogene	0.01404	0.003758	-0.002111	0.033477	0.036233
Pf3D7_04_v3	137390	146903	Pf3D7_04_v3	PF3D7_0402300	reticulocyte binding protein homologue 1	-0.055001	-0.009438	-0.05412	-0.029654	-0.068618
Pf3D7_04_v3	147240	148630	Pf3D7_04_v3	PF3D7_0402400	Plasmodium exported protein, unknown function	-0.162728	-0.15871	0.033748	-0.197441	-0.144826
Pf3D7_04_v3	155627	157234	Pf3D7_04_v3	PF3D7_0402500	rifin, pseudogene	-0.104631	-0.175888	-0.180677	-0.034022	-0.048303
Pf3D7_04_v3	159029	160564	Pf3D7_04_v3	PF3D7_0402600	stevor	-0.109065	-0.109094	-0.103942	-0.065322	-0.093778
Pf3D7_04_v3	162261	163974	Pf3D7_04_v3	PF3D7_0402700	rifin, pseudogene	-0.286492	-0.109239	-0.163421	-0.237149	-0.174795
Pf3D7_04_v3	166743	172204	Pf3D7_04_v3	PF3D7_0402800	erythrocyte membrane protein 1 (PfEMP1), pseudogene	-0.07515	-0.053856	-0.03963	0.028561	-0.010544
Pf3D7_04_v3	175138	177502	Pf3D7_04_v3	PF3D7_0403100	regulator of chromosome condensation, putative	-0.21733	-0.074538	-0.06174	0.039982	-0.045818
Pf3D7_04_v3	178268	180315	Pf3D7_04_v3	PF3D7_0403200	pre-mRNA splicing factor, putative	-0.264197	-0.038242	-0.115149	-0.132473	-0.101909
Pf3D7_04_v3	182620	194962	Pf3D7_04_v3	PF3D7_0403400	conserved Plasmodium protein, unknown function	-0.129838	-0.026988	-0.015126	-0.039228	-0.031642
Pf3D7_04_v3	195293	196995	Pf3D7_04_v3	PF3D7_0403500	ubiquitin specific protease, putative	-0.037453	-0.063949	-0.03236	0.257908	0.150377
Pf3D7_04_v3	197596	201458	Pf3D7_04_v3	PF3D7_0403600	conserved Plasmodium protein, unknown function	-0.077436	-0.025747	-0.073439	0.042519	-0.008065
Pf3D7_04_v3	205978	209644	Pf3D7_04_v3	PF3D7_0403700	pre-mRNA-splicing factor CLF1, putative	-0.100189	-0.018008	-0.119084	-0.015754	-0.022565
Pf3D7_04_v3	211400	214104	Pf3D7_04_v3	PF3D7_0403800	alpha/beta hydrolase, putative	-0.115576	-0.000988	-0.013259	0.015674	0.047048
Pf3D7_04_v3	218837	223088	Pf3D7_04_v3	PF3D7_0403900	SET domain protein, putative	-0.060636	-0.041832	-0.07152	0.079053	-0.00896
Pf3D7_04_v3	223461	224381	Pf3D7_04_v3	PF3D7_0404000	conserved Plasmodium protein, unknown function	0.047896	0.07694	0.138608	0.329692	0.296341
Pf3D7_04_v3	224529	231983	Pf3D7_04_v3	PF3D7_0404100	AP2 domain transcription factor AP2-SP2, putative	-0.059428	-0.079146	-0.114627	-0.219053	-0.147076
Pf3D7_04_v3	232345	233499	Pf3D7_04_v3	PF3D7_0404200	conserved Plasmodium protein, unknown function	-0.1367	0.021235	0.048081	0.149279	0.034831
Pf3D7_04_v3	233764	237263	Pf3D7_04_v3	PF3D7_0404300	conserved Plasmodium protein, unknown function	0.065221	0.05549	0.019608	0.005812	0.048747
Pf3D7_04_v3	238110	239749	Pf3D7_04_v3	PF3D7_0404400	6-cysteine protein P36	-0.024829	0.09138	-0.008463	0.185506	0.16238
Pf3D7_04_v3	240661	242597	Pf3D7_04_v3	PF3D7_0404500	6-cysteine protein P52	0.006588	0.02708	0.042041	-0.007436	0.020586
Pf3D7_04_v3	247481	260300	Pf3D7_04_v3	PF3D7_0404600	conserved Plasmodium membrane protein, unknown function	-0.127741	-0.00434	-0.022675	0.050475	0.007811
Pf3D7_04_v3	260301	263668	Pf3D7_04_v3	PF3D7_0404700	dipeptidyl aminopeptidase 3	-0.00467	-0.022088	-0.015762	0.100639	0.023739
Pf3D7_04_v3	264055	266420	Pf3D7_04_v3	PF3D7_0404800	conserved Plasmodium protein, unknown function	-0.047761	0.041411	0.11588	-0.001717	0.018024
Pf3D7_04_v3	266994	268630	Pf3D7_04_v3	PF3D7_0404900	6-cysteine protein P41	0.045791	-0.006573	0.074369	-0.042388	0.027828
Pf3D7_04_v3	268710	271384	Pf3D7_04_v3	PF3D7_0405000	ATP-dependent RNA helicase DDX51, putative	0.014963	-0.048283	-0.016033	0.345988	0.180077
Pf3D7_04_v3	272005	277074	Pf3D7_04_v3	PF3D7_0405100	protein transport protein Sec24B, putative	0.087403	0.049684	0.066225	0.203176	0.11879
Pf3D7_04_v3	278822	282193	Pf3D7_04_v3	PF3D7_0405200	ag-1 blood stage membrane protein homologue	0.005033	0.035611	0.026388	0.158474	0.029676
Pf3D7_04_v3	282194	288547	Pf3D7_04_v3	PF3D7_0405300	liver specific protein 2, putative	-0.015852	0.060313	0.017839	0.207361	0.091379
Pf3D7_04_v3	291001	301117	Pf3D7_04_v3	PF3D7_0405400	pre-mRNA-processing-splicing factor 8, putative	-0.012479	0.036182	0.064251	0.223185	0.136225
Pf3D7_04_v3	301118	302517	Pf3D7_04_v3	PF3D7_0405500	conserved Plasmodium protein, unknown function	0.232046	0.033505	0.044236	0.247083	0.15098
Pf3D7_04_v3	303079	305544	Pf3D7_04_v3	PF3D7_0405600	TMEM33 domain-containing protein, putative	-0.086553	0.045756	-0.000275	0.143325	0.129442
Pf3D7_04_v3	305545	313243	Pf3D7_04_v3	PF3D7_0405700	lysine decarboxylase, putative	0.031298	0.061259	0.027815	0.210134	0.15148
Pf3D7_04_v3	316290	319428	Pf3D7_04_v3	PF3D7_0405900	apical sushi protein	0.043093	0.044962	0.055134	0.046049	0.122349
Pf3D7_04_v3	320769	322795	Pf3D7_04_v3	PF3D7_0406000	conserved protein, unknown function	-0.023051	0.029568	0.011662	0.016932	0.046419
Pf3D7_04_v3	323017	325475	Pf3D7_04_v3	PF3D7_0406100	V-type proton ATPase subunit B	-0.021506	0.051052	0.059953	-0.006669	0.051483
Pf3D7_04_v3	328966	329939	Pf3D7_04_v3	PF3D7_0406200	sexual stage-specific protein precursor	-0.102729	0.007838	0.007153	0.345793	0.074838
Pf3D7_04_v3	331793	334069	Pf3D7_04_v3	PF3D7_0406400	cytosolic glyoxalase II	-0.03139	-0.056101	-0.044487	-0.188231	-0.05106
Pf3D7_04_v3	334070	344304	Pf3D7_04_v3	PF3D7_0406500	NYN domain-containing protein, putative	-0.034674	0.02448	0.022875	0.079426	0.063994
Pf3D7_04_v3	347208	351513	Pf3D7_04_v3	PF3D7_0406700	conserved Plasmodium protein, unknown function	0.005965	-0.051993	0.000714	0.091428	0.026577
Pf3D7_04_v3	351514	353233	Pf3D7_04_v3	PF3D7_0406800	ribosomal protein L25, putative	0.146503	0.217153	0.215416	0.163885	0.186
Pf3D7_04_v3	353405	360128	Pf3D7_04_v3	PF3D7_0406900	conserved Plasmodium protein, unknown function	-0.050804	0.011166	0.006359	0.082697	0.05107
Pf3D7_04_v3	360297	362014	Pf3D7_04_v3	PF3D7_0407000	conserved Plasmodium protein, unknown function	-0.039446	0.124444	0.049365	0.030997	-0.023475
Pf3D7_04_v3	362051	363520	Pf3D7_04_v3	PF3D7_0407100	methyltransferase, putative	-0.002662	-0.039868	-0.04411	-0.068745	-0.018679
Pf3D7_04_v3	363521	365183	Pf3D7_04_v3	PF3D7_0407200	peptidyl-tRNA hydrolase 2, putative	-0.04872	0.095452	0.012654	-0.009248	-0.076787
Pf3D7_04_v3	366129	367591	Pf3D7_04_v3	PF3D7_0407300	transcription factor, putative	-0.025023	-0.006739	0.001013	-0.221301	-0.156835
Pf3D7_04_v3	369635	371520	Pf3D7_04_v3	PF3D7_0407500	mitochondrial carrier protein, putative	-0.077274	0.096399	0.059898	-0.04617	-0.049471
Pf3D7_04_v3	372789	376927	Pf3D7_04_v3	PF3D7_0407600	conserved Plasmodium protein, unknown function	-0.120278	0.042056	0.025847	-0.005496	-0.037134
Pf3D7_04_v3	377231	383337	Pf3D7_04_v3	PF3D7_0407700	conserved Plasmodium protein, unknown function	-0.058345	0.027546	0.061163	-0.063995	0.030011
Pf3D7_04_v3	384674	391056	Pf3D7_04_v3	PF3D7_0407800	conserved Plasmodium protein, unknown function	-0.110248	0.003294	0.008303	-0.001988	0.038315
Pf3D7_04_v3	391097	393600	Pf3D7_04_v3	PF3D7_0407900	AAA family ATPase, putative	-0.065321	-0.010148	0.04233	0.223921	0.102016
Pf3D7_04_v3	397078	400943	Pf3D7_04_v3	PF3D7_0408100	conserved Plasmodium protein, unknown function	-0.091916	0.024573	-0.027353	0.067083	-0.03108
Pf3D7_04_v3	401216	403480	Pf3D7_04_v3	PF3D7_0408200	conserved Plasmodium protein, unknown function	-0.229258	-0.064643	-0.000882	-0.114686	-0.039781
Pf3D7_04_v3	403481	405616	Pf3D7_04_v3	PF3D7_0408300	zinc finger Ran-binding domain-containing protein 2, putative	-0.04183	-0.051743	-0.012051	-0.197026	-0.136642
Pf3D7_04_v3	405983	408159	Pf3D7_04_v3	PF3D7_0408400	conserved protein, unknown function	-0.072327	-0.023038	-0.05638	-0.09405	-0.077625
Pf3D7_04_v3	408429	410947	Pf3D7_04_v3	PF3D7_0408500	flap endonuclease 1	0.009074	0.04949	0.083394	0.047448	0.011707
Pf3D7_04_v3	413153	416607	Pf3D7_04_v3	PF3D7_0408600	sporozoite invasion-associated protein 1	0.113912	0.107261	0.051768	0.169253	0.10997
Pf3D7_04_v3	417122	421074	Pf3D7_04_v3	PF3D7_0408700	perforin-like protein 1	-0.001099	0.024777	-0.001957	-0.030399	0.057057
Pf3D7_04_v3	421761	423208	Pf3D7_04_v3	PF3D7_0408800	conserved Plasmodium protein, unknown function	-0.026672	-0.017481	0.008551	-0.044102	0.064316
Pf3D7_04_v3	424050	427429	Pf3D7_04_v3	PF3D7_0408900	tRNA N6-adenosine threonylcarbamoyltransferase	-0.023028	0.012071	0.041792	0.212892	0.060845
Pf3D7_04_v3	427430	435617	Pf3D7_04_v3	PF3D7_0409000	conserved Plasmodium protein, unknown function	-0.006749	-0.018201	-0.02217	0.110561	0.039169
Pf3D7_04_v3	435967	438231	Pf3D7_04_v3	PF3D7_0409100	U4/U6 small nuclear ribonucleoprotein PRP31, putative	-0.020423	0.039539	0.0345	0.06411	0.088095
Pf3D7_04_v3	438637	440585	Pf3D7_04_v3	PF3D7_0409200	protein SOF1, putative	0.053027	0.037144	0.108411	0.123572	0.080012
Pf3D7_04_v3	440718	444492	Pf3D7_04_v3	PF3D7_0409300	methyltransferase, putative	-0.084104	0.016776	0.002983	-0.010923	0.004751
Pf3D7_04_v3	445750	448268	Pf3D7_04_v3	PF3D7_0409400	chaperone protein DnaJ	0.084935	0.035943	-2.9e-05	0.11394	0.086946
Pf3D7_04_v3	448939	450883	Pf3D7_04_v3	PF3D7_0409500	NAD(P)-binding protein, putative	-0.029786	-0.015308	-0.025707	-0.06076	-0.021496
Pf3D7_04_v3	451884	455821	Pf3D7_04_v3	PF3D7_0409600	replication protein A1, large subunit	-0.034657	-0.095314	-0.030694	0.059155	-0.008258
Pf3D7_04_v3	456672	458270	Pf3D7_04_v3	PF3D7_0409700	peptide chain release factor 2	-0.001119	-0.146914	-0.098194	0.070146	0.095598
Pf3D7_04_v3	459460	461687	Pf3D7_04_v3	PF3D7_0409800	zinc finger protein, putative	0.0883	-0.054613	-0.032362	0.05766	-0.045009
Pf3D7_04_v3	461741	464207	Pf3D7_04_v3	PF3D7_0409900	actin-like protein, putative	0.151171	-0.066004	0.005263	-0.269781	-0.124525
Pf3D7_04_v3	464482	467589	Pf3D7_04_v3	PF3D7_0410000	erythrocyte vesicle protein 1	0.212152	-0.135249	-0.100794	-0.139215	-0.080096
Pf3D7_04_v3	470278	473846	Pf3D7_04_v3	PF3D7_0410300	protein phosphatase PPM1, putative	0.153823	-0.099378	-0.067331	-0.003223	0.002966
Pf3D7_04_v3	474292	475751	Pf3D7_04_v3	PF3D7_0410400	exosome complex component RRP4	0.17282	-0.003714	0.025463	0.124489	0.104335
Pf3D7_04_v3	475752	476835	Pf3D7_04_v3	PF3D7_0410500	conserved Plasmodium protein, unknown function	0.163978	0.040983	0.002652	0.238949	0.102829
Pf3D7_04_v3	478778	480718	Pf3D7_04_v3	PF3D7_0410600	conserved protein, unknown function	0.137437	0.077623	0.089246	0.059407	0.025581
Pf3D7_04_v3	480927	484141	Pf3D7_04_v3	PF3D7_0410700	ribosome biogenesis GTPase A, putative	-0.066124	-0.073351	-0.035509	-0.040537	-0.027858
Pf3D7_04_v3	485582	489978	Pf3D7_04_v3	PF3D7_0410800	conserved Plasmodium protein, unknown function	-0.046009	-0.087219	-0.108519	-0.086878	-0.110811
Pf3D7_04_v3	490192	493625	Pf3D7_04_v3	PF3D7_0410900	conserved Plasmodium protein, unknown function	-0.018094	-0.040044	-0.063331	-0.048011	-0.094928
Pf3D7_04_v3	498918	504130	Pf3D7_04_v3	PF3D7_0411000	conserved Plasmodium protein, unknown function	-0.046887	-0.0445	-0.044301	0.055891	-0.010031
Pf3D7_04_v3	504228	505345	Pf3D7_04_v3	PF3D7_0411100	mediator of RNA polymerase II transcription subunit 8, putative	0.03787	-0.080623	-0.030744	-0.218012	-0.153992
Pf3D7_04_v3	505683	509920	Pf3D7_04_v3	PF3D7_0411200	PP-loop family protein, putative	0.037968	-0.044224	-0.039948	-0.042994	-0.068721
Pf3D7_04_v3	510130	512798	Pf3D7_04_v3	PF3D7_0411300	conserved Plasmodium protein, unknown function	0.017972	-0.135184	-0.098089	-0.124766	-0.08625
Pf3D7_04_v3	512904	517318	Pf3D7_04_v3	PF3D7_0411400	DEAD box ATP-dependent RNA helicase, putative	0.051616	0.002686	0.018893	0.060705	0.064573
Pf3D7_04_v3	519582	525868	Pf3D7_04_v3	PF3D7_0411800	conserved Plasmodium protein, unknown function	0.009388	-0.060896	-0.056111	-0.16289	-0.09412
Pf3D7_04_v3	527942	534735	Pf3D7_04_v3	PF3D7_0411900	DNA polymerase alpha catalytic subunit A	0.052498	0.025284	-0.003203	-0.044069	0.001632
Pf3D7_04_v3	536524	539360	Pf3D7_04_v3	PF3D7_0412000	LITAF-like zinc finger protein, putative	-0.060657	-0.0021	-0.068093	-0.086681	-0.059298
Pf3D7_04_v3	539938	541448	Pf3D7_04_v3	PF3D7_0412100	30S ribosomal protein S12, mitochondrial, putative	-0.016613	-0.005277	-0.070399	0.004221	0.028961
Pf3D7_04_v3	541561	543059	Pf3D7_04_v3	PF3D7_0412200	conserved Plasmodium protein, unknown function	-0.100972	-0.16786	-0.0167	-0.302175	-0.229725
Pf3D7_04_v3	543375	545497	Pf3D7_04_v3	PF3D7_0412300	phosphopantothenoylcysteine synthetase, putative	-0.000763	0.095678	-0.06807	-0.100752	-0.069029
Pf3D7_04_v3	545737	554060	Pf3D7_04_v3	PF3D7_0412400	erythrocyte membrane protein 1, PfEMP1	0.280505	0.104969	0.10296	0.23845	0.232549
Pf3D7_04_v3	559137	560888	Pf3D7_04_v3	PF3D7_0412600	rifin, pseudogene	-0.172533	-0.033275	-0.047382	-0.141556	-0.089503
Pf3D7_04_v3	561417	569592	Pf3D7_04_v3	PF3D7_0412700	erythrocyte membrane protein 1, PfEMP1	0.138657	0.031529	0.052767	-0.009008	0.050331
Pf3D7_04_v3	591699	600099	Pf3D7_04_v3	PF3D7_0413100	erythrocyte membrane protein 1, PfEMP1	0.101303	0.034599	0.060813	0.145979	0.104401
Pf3D7_04_v3	602916	604706	Pf3D7_04_v3	PF3D7_0413200	rifin	0.075506	0.039939	0.066034	0.164459	0.030693
Pf3D7_04_v3	608905	610683	Pf3D7_04_v3	PF3D7_0413300	rifin	-0.099757	-0.044143	-0.032182	-0.281847	-0.176988
Pf3D7_04_v3	612548	614319	Pf3D7_04_v3	PF3D7_0413400	erythrocyte membrane protein 1 (PfEMP1), exon 1, pseudogene	-0.025852	0.021469	-0.00465	-0.075015	0.006821
Pf3D7_04_v3	615106	616493	Pf3D7_04_v3	PF3D7_0413500	phosphoglucomutase-2	0.117989	0.125566	0.08918	0.157004	0.087514
Pf3D7_04_v3	616664	618600	Pf3D7_04_v3	PF3D7_0413600	26S protease regulatory subunit 6B, putative	0.034474	0.026359	0.011038	-0.077971	-0.026613
Pf3D7_04_v3	619536	621052	Pf3D7_04_v3	PF3D7_0413700	lysine decarboxylase-like protein, putative	-0.089484	-0.057612	-0.030421	-0.231546	-0.086048
Pf3D7_04_v3	621844	623052	Pf3D7_04_v3	PF3D7_0413800	50S ribosomal protein L10, putative	0.055401	0.114732	0.139877	-0.136083	0.071885
Pf3D7_04_v3	623053	626476	Pf3D7_04_v3	PF3D7_0413900	ubiquitin carboxyl-terminal hydrolase 13, putative	0.05739	0.093186	0.067906	0.036023	0.102815
Pf3D7_04_v3	626641	633376	Pf3D7_04_v3	PF3D7_0414000	structural maintenance of chromosomes protein 3, putative	0.047958	-0.016185	0.039851	-0.015539	0.031068
Pf3D7_04_v3	633779	639155	Pf3D7_04_v3	PF3D7_0414100	conserved Plasmodium membrane protein, unknown function	0.043112	0.069342	0.036278	-0.107966	-0.023664
Pf3D7_04_v3	647139	648638	Pf3D7_04_v3	PF3D7_0414200	calmodulin-like protein	-0.039445	-0.03884	0.096664	-0.143601	-0.079832
Pf3D7_04_v3	652100	653804	Pf3D7_04_v3	PF3D7_0414400	conserved Plasmodium protein, unknown function	0.014321	0.067188	0.052957	0.029272	-0.050699
Pf3D7_04_v3	654775	657564	Pf3D7_04_v3	PF3D7_0414500	RNA-binding protein, putative	0.067603	0.111362	0.065897	0.047072	-0.005676
Pf3D7_04_v3	658370	659788	Pf3D7_04_v3	PF3D7_0414600	acylated pleckstrin-homology domain-containing protein, putative	0.072787	0.061656	-0.060951	-0.117536	-0.013793
Pf3D7_04_v3	660374	662769	Pf3D7_04_v3	PF3D7_0414700	GTP-binding protein, putative	0.043629	0.025145	0.005995	0.049941	0.044843
Pf3D7_04_v3	663166	664265	Pf3D7_04_v3	PF3D7_0414800	conserved Plasmodium protein, unknown function	-0.093653	-0.03651	0.044567	-0.14014	-0.072072
Pf3D7_04_v3	665723	668362	Pf3D7_04_v3	PF3D7_0414900	armadillo-domain containing rhoptry protein	0.082367	0.059498	0.066544	-0.109934	0.017907
Pf3D7_04_v3	668363	669967	Pf3D7_04_v3	PF3D7_0415000	arsenical pump-driving ATPase, putative	-0.104248	0.006742	-0.084206	-0.035003	-0.036177
Pf3D7_04_v3	670633	672312	Pf3D7_04_v3	PF3D7_0415100	conserved protein, unknown function	0.137684	0.030674	-0.03495	-0.035863	0.021568
Pf3D7_04_v3	672313	679388	Pf3D7_04_v3	PF3D7_0415200	conserved Plasmodium protein, unknown function	0.057048	0.065083	0.026901	0.029046	0.044598
Pf3D7_04_v3	681560	686191	Pf3D7_04_v3	PF3D7_0415300	cdc2-related protein kinase 3	0.060653	0.007509	0.010752	0.037981	0.00932
Pf3D7_04_v3	686192	687290	Pf3D7_04_v3	PF3D7_0415400	coatomer subunit zeta, putative	-0.134232	-0.145564	-0.113496	-0.008905	-0.098072
Pf3D7_04_v3	687942	689303	Pf3D7_04_v3	PF3D7_0415500	nuclear cap-binding protein subunit 2, putative	0.059329	0.03063	-0.020732	0.061767	0.043858
Pf3D7_04_v3	689390	690579	Pf3D7_04_v3	PF3D7_0415600	GTP:AMP phosphotransferase	0.0318	0.111832	0.128025	-0.004367	0.131052
Pf3D7_04_v3	690881	692766	Pf3D7_04_v3	PF3D7_0415700	conserved Plasmodium protein, unknown function	0.034791	-0.007062	-0.094902	-0.019235	0.026445
Pf3D7_04_v3	693656	696783	Pf3D7_04_v3	PF3D7_0415800	RING zinc finger protein, putative	0.037269	-0.009674	-0.030846	-0.121283	-0.14153
Pf3D7_04_v3	697668	699018	Pf3D7_04_v3	PF3D7_0415900	60S ribosomal protein L15, putative	0.104795	-0.008488	-0.018623	0.199614	-0.011772
Pf3D7_04_v3	701276	704412	Pf3D7_04_v3	PF3D7_0416000	RNA-binding protein, putative	0.082003	0.042068	0.017337	-0.05084	-0.052866
Pf3D7_04_v3	706279	709234	Pf3D7_04_v3	PF3D7_0416100	glutamyl-tRNA(Gln) amidotransferase subunit A	-0.053712	-0.052834	-0.124216	-0.047476	-0.068998
Pf3D7_04_v3	709235	710333	Pf3D7_04_v3	PF3D7_0416200	conserved protein, unknown function	0.068466	-0.05987	0.04165	0.062187	0.037984
Pf3D7_04_v3	710842	715739	Pf3D7_04_v3	PF3D7_0416300	DNA helicase MCM9, putative	-0.044637	-0.011643	0.006019	0.031356	-0.023247
Pf3D7_04_v3	717952	722863	Pf3D7_04_v3	PF3D7_0416400	histone acetyltransferase, putative	-0.005748	0.017235	-0.01997	0.031112	0.001073
Pf3D7_04_v3	722864	724492	Pf3D7_04_v3	PF3D7_0416500	repressor of RNA polymerase III transcription MAF1	-2.5e-05	0.012273	-0.019189	0.059939	-0.078317
Pf3D7_04_v3	726015	727378	Pf3D7_04_v3	PF3D7_0416600	prohibitin-like protein PHBL, putative	-0.036891	-0.020502	-0.064927	0.031752	-0.037258
Pf3D7_04_v3	727460	728229	Pf3D7_04_v3	PF3D7_0416700	CDGSH iron-sulfur domain-containing protein, putative	0.00971	0.066065	0.131761	0.105214	0.110822
Pf3D7_04_v3	729712	731473	Pf3D7_04_v3	PF3D7_0416800	small GTP-binding protein sar1	-0.064298	-0.084953	-0.002132	-0.017428	-0.055322
Pf3D7_04_v3	732202	740122	Pf3D7_04_v3	PF3D7_0416900	conserved Plasmodium protein, unknown function	0.021141	-0.004699	0.047619	0.109049	0.075079
Pf3D7_04_v3	741899	743341	Pf3D7_04_v3	PF3D7_0417000	conserved Plasmodium protein, unknown function	-0.065659	-0.137439	-0.072388	-0.107613	-0.075767
Pf3D7_04_v3	743361	745887	Pf3D7_04_v3	PF3D7_0417100	mRNA-binding protein PUF2	0.016832	-0.009059	-0.015116	0.005352	9.1e-05
Pf3D7_04_v3	747838	750164	Pf3D7_04_v3	PF3D7_0417200	bifunctional dihydrofolate reductase-thymidylate synthase	0.023111	-0.035941	0.030244	-0.046781	0.026916
Pf3D7_04_v3	750610	753962	Pf3D7_04_v3	PF3D7_0417300	LETM1-like protein, putative	0.058122	0.06844	0.013647	0.108862	0.10921
Pf3D7_04_v3	756044	776853	Pf3D7_04_v3	PF3D7_0417400	conserved Plasmodium protein, unknown function	-0.021327	-0.025334	-0.015992	0.019446	-0.000738
Pf3D7_04_v3	776950	779674	Pf3D7_04_v3	PF3D7_0417500	memo-like protein	0.196789	0.101083	0.160588	0.03072	0.131942
Pf3D7_04_v3	780000	783496	Pf3D7_04_v3	PF3D7_0417600	conserved Plasmodium protein, unknown function	0.014333	0.005696	0.02527	0.013168	-0.049791
Pf3D7_04_v3	783944	786680	Pf3D7_04_v3	PF3D7_0417700	conserved Plasmodium protein, unknown function	0.040184	-0.030975	0.057761	0.031027	0.070027
Pf3D7_04_v3	786993	789592	Pf3D7_04_v3	PF3D7_0417800	cdc2-related protein kinase 1	0.041564	0.004845	0.032902	0.150371	0.077648
Pf3D7_04_v3	790474	793235	Pf3D7_04_v3	PF3D7_0417900	conserved Plasmodium protein, unknown function	0.044729	-0.012858	-0.02758	-0.078608	-0.013407
Pf3D7_04_v3	793577	810320	Pf3D7_04_v3	PF3D7_0418000	conserved Plasmodium protein, unknown function	-0.015196	0.007108	0.024909	0.119307	0.061858
Pf3D7_04_v3	810745	814892	Pf3D7_04_v3	PF3D7_0418100	protein SOC1, putative	-0.033454	-0.007456	-0.037013	-0.026435	-0.009259
Pf3D7_04_v3	817150	818939	Pf3D7_04_v3	PF3D7_0418200	eukaryotic translation initiation factor 3 subunit M, putative	-0.052397	-0.004647	-0.003872	-0.054289	-0.018999
Pf3D7_04_v3	819112	822590	Pf3D7_04_v3	PF3D7_0418300	conserved Plasmodium protein, unknown function	-0.010408	-0.049527	0.012192	-0.07264	-0.047173
Pf3D7_04_v3	829713	830791	Pf3D7_04_v3	PF3D7_0418400	conserved Plasmodium protein, unknown function	0.15959	0.207514	0.097199	0.125041	0.109783
Pf3D7_04_v3	830792	832678	Pf3D7_04_v3	PF3D7_0418500	trafficking protein particle complex subunit 3, putative	0.107485	0.058821	0.042098	-0.049794	-0.016818
Pf3D7_04_v3	834144	840679	Pf3D7_04_v3	PF3D7_0418600	regulator of chromosome condensation, putative	0.021566	-0.013971	-0.019566	-0.036127	-0.000482
Pf3D7_04_v3	840946	843155	Pf3D7_04_v3	PF3D7_0418700	RNA-binding protein NOB1, putative	0.002068	-0.003516	-0.054607	-0.004502	-0.001698
Pf3D7_04_v3	843312	845419	Pf3D7_04_v3	PF3D7_0418800	MOLO1 domain-containing protein, putative	0.020675	0.053458	0.119598	0.045055	0.111148
Pf3D7_04_v3	846981	849309	Pf3D7_04_v3	PF3D7_0418900	conserved protein, unknown function	0.083512	0.093251	0.097877	0.081756	0.066982
Pf3D7_04_v3	849543	852376	Pf3D7_04_v3	PF3D7_0419000	conserved Plasmodium protein, unknown function	0.137859	0.051027	0.038774	0.170251	0.071112
Pf3D7_04_v3	852377	853816	Pf3D7_04_v3	PF3D7_0419100	conserved Plasmodium protein, unknown function	0.049745	-0.032574	-0.021939	-0.007563	-0.055102
Pf3D7_04_v3	855648	857299	Pf3D7_04_v3	PF3D7_0419300	conserved Plasmodium protein, unknown function	-0.004692	0.030192	-0.017364	0.132178	0.066984
Pf3D7_04_v3	857748	866207	Pf3D7_04_v3	PF3D7_0419400	conserved Plasmodium protein, unknown function	-0.028952	0.052037	0.027959	-0.017314	0.047843
Pf3D7_04_v3	866251	868361	Pf3D7_04_v3	PF3D7_0419500	conserved Plasmodium membrane protein, unknown function	-0.031717	-0.061095	-0.081872	-0.095319	-0.012681
Pf3D7_04_v3	870487	872123	Pf3D7_04_v3	PF3D7_0419600	ran-specific GTPase-activating protein 1, putative	0.080393	-0.012199	0.072733	0.087993	0.100392
Pf3D7_04_v3	872888	874365	Pf3D7_04_v3	PF3D7_0419700	apical merozoite protein	0.095674	-0.041367	0.00859	0.111748	0.075084
Pf3D7_04_v3	874561	875771	Pf3D7_04_v3	PF3D7_0419800	60S ribosomal protein L7ae/L30e, putative	-0.01689	-0.095442	-0.089629	-0.09019	-0.097162
Pf3D7_04_v3	877772	894116	Pf3D7_04_v3	PF3D7_0419900	phosphatidylinositol 4-kinase, putative	0.010307	-0.022437	-0.015673	-0.082052	-0.012147
Pf3D7_04_v3	894362	904974	Pf3D7_04_v3	PF3D7_0420000	zinc finger protein, putative	-0.005581	-0.021936	-0.000306	-0.105442	-0.043286
Pf3D7_04_v3	906806	909051	Pf3D7_04_v3	PF3D7_0420100	serine/threonine protein kinase RIO2	-0.038525	-0.029446	-0.027462	-0.070891	-0.007003
Pf3D7_04_v3	909937	912221	Pf3D7_04_v3	PF3D7_0420200	holo-[acyl-carrier-protein] synthase, putative	0.035477	0.020993	-0.029783	0.02828	-0.007839
Pf3D7_04_v3	917740	928661	Pf3D7_04_v3	PF3D7_0420300	AP2 domain transcription factor, putative	0.00534	-0.002227	0.024618	0.04657	0.037642
Pf3D7_04_v3	929090	930272	Pf3D7_04_v3	PF3D7_0420400	ribosome-recycling factor	0.031957	0.022539	-0.00319	-0.03462	-0.01351
Pf3D7_04_v3	930273	931858	Pf3D7_04_v3	PF3D7_0420500	conserved Plasmodium protein, unknown function	0.043219	-0.08398	-0.041187	-0.113253	-0.006871
Pf3D7_04_v3	932213	934494	Pf3D7_04_v3	PF3D7_0420600	conserved Plasmodium protein, unknown function	-0.062153	-0.026807	0.023815	-0.036517	-0.00471
Pf3D7_04_v3	934781	942125	Pf3D7_04_v3	PF3D7_0420700	erythrocyte membrane protein 1, PfEMP1	0.108193	0.064518	0.027381	0.113171	0.15133
Pf3D7_04_v3	957817	965861	Pf3D7_04_v3	PF3D7_0421100	erythrocyte membrane protein 1, PfEMP1	-0.275808	-0.401305	-0.290643	-3.32829	-0.092699
Pf3D7_04_v3	966837	968523	Pf3D7_04_v3	PF3D7_0421200	rifin	0.134919	0.148127	0.109975	1.47687	0.860932
Pf3D7_04_v3	968781	976841	Pf3D7_04_v3	PF3D7_0421300	erythrocyte membrane protein 1, PfEMP1	-0.092882	0.150887	0.145399	1.54692	0.84464
Pf3D7_04_v3	981573	983240	Pf3D7_04_v3	PF3D7_0421500	rifin, pseudogene	0.073082	0.143083	0.114942	1.32511	0.783438
Pf3D7_04_v3	985885	987644	Pf3D7_04_v3	PF3D7_0421600	erythrocyte membrane protein 1 (PfEMP1)-like pseudogene	-0.016634	-0.049048	-0.019941	-0.120162	-0.086636
Pf3D7_04_v3	987645	994610	Pf3D7_04_v3	PF3D7_0421700	conserved Plasmodium protein, unknown function	-0.038235	-0.062353	-0.024046	0.089283	0.046585
Pf3D7_04_v3	998397	1000435	Pf3D7_04_v3	PF3D7_0422000	steroid dehydrogenase, putative	0.03277	-0.049167	-0.057255	0.129251	0.056978
Pf3D7_04_v3	1001363	1003020	Pf3D7_04_v3	PF3D7_0422100	transmembrane emp24 domain-containing protein, putative	-0.017727	0.119241	0.057446	0.06896	0.071103
Pf3D7_04_v3	1004212	1017497	Pf3D7_04_v3	PF3D7_0422200	erythrocyte membrane-associated antigen	-0.097463	0.020168	-0.058857	0.006867	0.001805
Pf3D7_04_v3	1022237	1024416	Pf3D7_04_v3	PF3D7_0422300	alpha tubulin 2	-0.049899	-0.025028	-0.049097	0.069188	0.028044
Pf3D7_04_v3	1026398	1027649	Pf3D7_04_v3	PF3D7_0422400	40S ribosomal protein S19	-0.12713	-0.077631	-0.053534	-0.077967	-0.059258
Pf3D7_04_v3	1029079	1038203	Pf3D7_04_v3	PF3D7_0422500	pre-mRNA-splicing helicase BRR2, putative	-0.047574	-0.019868	-0.100177	0.197242	0.064613
Pf3D7_04_v3	1040220	1041892	Pf3D7_04_v3	PF3D7_0422700	eukaryotic initiation factor 4A-III, putative	-0.012514	-0.033315	-0.03616	0.128069	0.056947
Pf3D7_04_v3	1042314	1045138	Pf3D7_04_v3	PF3D7_0422800	serpentine receptor, putative	0.059435	0.035979	0.007114	0.021361	-0.005694
Pf3D7_04_v3	1045139	1046946	Pf3D7_04_v3	PF3D7_0422900	methyltransferase, putative	-0.026305	-0.018125	-0.006438	-0.104703	-0.073015
Pf3D7_04_v3	1047446	1048728	Pf3D7_04_v3	PF3D7_0423000	conserved Plasmodium protein, unknown function	0.139491	0.006256	0.002248	0.399191	0.217142
Pf3D7_04_v3	1049020	1050144	Pf3D7_04_v3	PF3D7_0423100	AP-4 complex subunit sigma, putative	-0.186193	-0.166447	-0.113801	-0.141337	-0.09905
Pf3D7_04_v3	1051326	1053256	Pf3D7_04_v3	PF3D7_0423300	conserved Plasmodium protein, unknown function	0.034828	0.011513	-0.060109	-0.233957	-0.044236
Pf3D7_04_v3	1055415	1056568	Pf3D7_04_v3	PF3D7_0423400	apical asparagine-rich protein AARP	-0.045875	-0.118666	-0.125712	-0.086666	-0.192691
Pf3D7_04_v3	1058747	1060801	Pf3D7_04_v3	PF3D7_0423500	glideosome associated protein with multiple membrane spans 2	-0.009499	0.026583	-0.055214	0.400967	0.154485
Pf3D7_04_v3	1061540	1066878	Pf3D7_04_v3	PF3D7_0423600	conserved Plasmodium protein, unknown function	0.006451	-0.058686	-0.1258	0.106838	-0.018125
Pf3D7_04_v3	1071185	1072095	Pf3D7_04_v3	PF3D7_0423700	early transcribed membrane protein 4	0.030731	-0.095093	-0.096028	0.123023	0.001466
Pf3D7_04_v3	1076097	1077730	Pf3D7_04_v3	PF3D7_0423800	cysteine-rich protective antigen	-0.119533	-0.126089	-0.06868	0.619093	0.243107
Pf3D7_04_v3	1077731	1078738	Pf3D7_04_v3	PF3D7_0423900	probable protein, unknown function	-0.023599	-0.006987	-0.025209	0.095304	0.060937
Pf3D7_04_v3	1080709	1082276	Pf3D7_04_v3	PF3D7_0424000	Plasmodium exported protein (PHISTc), unknown function	-0.011202	-0.054471	0.002476	0.178811	0.041562
Pf3D7_04_v3	1082277	1084400	Pf3D7_04_v3	PF3D7_0424100	reticulocyte binding protein homologue 5	-0.068411	-0.130583	-0.05389	-0.023119	-0.054065
Pf3D7_04_v3	1085729	1091527	Pf3D7_04_v3	PF3D7_0424200	reticulocyte binding protein homologue 4	-0.134554	-0.099131	-0.092524	0.052204	-0.111894
Pf3D7_04_v3	1092888	1098085	Pf3D7_04_v3	PF3D7_0424300	erythrocyte binding antigen-165, pseudogene	0.059386	-0.009537	-0.027683	0.139698	-0.015866
Pf3D7_04_v3	1099561	1107361	Pf3D7_04_v3	PF3D7_0424400	surface-associated interspersed protein 4.2 (SURFIN 4.2)	-0.052967	-0.043921	-0.027937	0.099094	-0.020029
Pf3D7_04_v3	1109810	1112543	Pf3D7_04_v3	PF3D7_0424500	serine/threonine protein kinase, FIKK family	-0.016031	-0.103388	-0.081688	0.30301	-0.008686
Pf3D7_04_v3	1113095	1114736	Pf3D7_04_v3	PF3D7_0424600	Plasmodium exported protein (PHISTb), unknown function	-0.043091	-0.027552	-0.089661	0.33399	0.064236
Pf3D7_04_v3	1118180	1122664	Pf3D7_04_v3	PF3D7_0424700	serine/threonine protein kinase, FIKK family	0.020764	-0.040239	-0.014057	0.201275	0.024629
Pf3D7_04_v3	1123736	1125254	Pf3D7_04_v3	PF3D7_0424800	Plasmodium exported protein (PHISTb), unknown function	-0.042568	-0.155216	-0.041681	-0.109983	-0.082411
Pf3D7_04_v3	1127529	1129052	Pf3D7_04_v3	PF3D7_0424900	Plasmodium exported protein (PHISTa), unknown function	-0.100276	-0.148994	-0.21019	-0.045675	-0.150236
Pf3D7_04_v3	1129410	1131143	Pf3D7_04_v3	PF3D7_0425000	Plasmodium exported protein, unknown function, pseudogene	-0.171965	-0.109791	-0.079003	0.000634	-0.141716
Pf3D7_04_v3	1136336	1137635	Pf3D7_04_v3	PF3D7_0425200	Plasmodium exported protein (hyp15), unknown function	-0.071073	-0.078511	-0.005709	0.102604	0.019599
Pf3D7_04_v3	1140972	1142346	Pf3D7_04_v3	PF3D7_0425300	Plasmodium exported protein (PHISTa), unknown function, pseudogene	0.014883	-0.059604	0.009148	0.144855	0.076849
Pf3D7_04_v3	1143742	1145074	Pf3D7_04_v3	PF3D7_0425400	Plasmodium exported protein (PHISTa), unknown function	0.038491	0.039479	0.007589	0.109571	-0.069946
Pf3D7_04_v3	1156173	1168071	Pf3D7_04_v3	PF3D7_0425800	erythrocyte membrane protein 1, PfEMP1	-0.160162	0.047728	0.059992	0.142263	0.012509
Pf3D7_04_v3	1172803	1180476	Pf3D7_04_v3	PF3D7_0426000	erythrocyte membrane protein 1, PfEMP1	-0.004206	-0.069756	-0.069229	-4.02762	-3.97592
Pf3D7_05_v3	20679	28706	Pf3D7_05_v3	PF3D7_0500100	erythrocyte membrane protein 1, PfEMP1	0.151343	0.073495	0.066901	-13.1936	-13.3355
Pf3D7_05_v3	32806	34628	Pf3D7_05_v3	PF3D7_0500400	rifin	0.252766	0.206889	0.131037	-24.2758	-7.99915
Pf3D7_05_v3	36214	37814	Pf3D7_05_v3	PF3D7_0500500	rifin	0.38411	0.141436	0.144802	-8.62546	-6.84218
Pf3D7_05_v3	39193	40738	Pf3D7_05_v3	PF3D7_0500600	stevor, pseudogene	0.109359	0.05584	0.05342	0.208897	0.162603
Pf3D7_05_v3	43077	48011	Pf3D7_05_v3	PF3D7_0500800	mature parasite-infected erythrocyte surface antigen	0.173609	0.013063	0.014222	0.191836	0.148982
Pf3D7_05_v3	50172	52760	Pf3D7_05_v3	PF3D7_0500900	serine/threonine protein kinase, FIKK family	-0.090765	-0.09051	-0.002998	0.127177	0.048519
Pf3D7_05_v3	55591	57122	Pf3D7_05_v3	PF3D7_0501000	Plasmodium exported protein, unknown function	-0.151739	-0.054472	-0.093602	0.051485	0.028995
Pf3D7_05_v3	57787	59976	Pf3D7_05_v3	PF3D7_0501100	heat shock protein 40, type II	-0.132486	0.002566	-0.009707	0.061404	-0.095094
Pf3D7_05_v3	63815	65739	Pf3D7_05_v3	PF3D7_0501200	parasite-infected erythrocyte surface protein	-0.01837	-0.000253	-0.032128	0.14316	0.104375
Pf3D7_05_v3	68680	70363	Pf3D7_05_v3	PF3D7_0501300	skeleton-binding protein 1	-0.08119	-0.075392	-0.121139	-0.09554	-0.09214
Pf3D7_05_v3	74259	80092	Pf3D7_05_v3	PF3D7_0501400	interspersed repeat antigen	-0.118148	-0.094048	0.000704	0.17069	0.022316
Pf3D7_05_v3	80884	82586	Pf3D7_05_v3	PF3D7_0501500	rhoptry-associated protein 3	-0.117537	-0.070549	-0.098216	0.033679	-0.038594
Pf3D7_05_v3	83791	85487	Pf3D7_05_v3	PF3D7_0501600	rhoptry-associated protein 2	-0.264063	-0.0165	-0.080641	-0.013202	-0.094035
Pf3D7_05_v3	86570	89451	Pf3D7_05_v3	PF3D7_0501700	anaphase-promoting complex subunit 3, putative	-0.133396	-0.043871	-0.057923	-0.166754	-0.114222
Pf3D7_05_v3	91111	94841	Pf3D7_05_v3	PF3D7_0501800	chromatin assembly factor 1 subunit A	0.098311	0.099982	0.130517	-0.033257	0.038955
Pf3D7_05_v3	94911	96883	Pf3D7_05_v3	PF3D7_0501900	conserved protein, unknown function	0.00881	0.004335	0.020139	0.113667	0.07517
Pf3D7_05_v3	97407	102044	Pf3D7_05_v3	PF3D7_0502000	vacuolar protein sorting-associated protein 11, putative	-0.083089	-0.034099	0.004118	0.235014	0.062939
Pf3D7_05_v3	102045	103147	Pf3D7_05_v3	PF3D7_0502100	HCNGP-like protein	-0.215217	-0.044857	-0.010163	0.051189	-0.015379
Pf3D7_05_v3	104006	105987	Pf3D7_05_v3	PF3D7_0502200	protein Mpv17, putative	-0.169207	-0.005884	0.001376	0.060585	0.010264
Pf3D7_05_v3	106825	108188	Pf3D7_05_v3	PF3D7_0502300	conserved Plasmodium protein, unknown function	-0.100595	0.003897	-0.038761	0.19245	0.064001
Pf3D7_05_v3	109648	111941	Pf3D7_05_v3	PF3D7_0502400	merozoite surface protein 8	-0.060049	-0.019496	-0.034166	-0.044949	-0.020905
Pf3D7_05_v3	113899	116183	Pf3D7_05_v3	PF3D7_0502500	conserved Plasmodium protein, unknown function	0.076222	-0.078365	-0.101895	0.042761	0.000282
Pf3D7_05_v3	116201	120038	Pf3D7_05_v3	PF3D7_0502600	conserved Plasmodium protein, unknown function	-0.151059	-0.095504	-0.078171	0.035306	-0.053571
Pf3D7_05_v3	120039	121705	Pf3D7_05_v3	PF3D7_0502700	conserved protein, unknown function	0.00584	-0.070265	-0.053669	0.019117	-0.133267
Pf3D7_05_v3	123098	124154	Pf3D7_05_v3	PF3D7_0502900	Tim10/DDP family zinc finger protein, putative	-0.117161	-0.023811	-0.010303	0.105444	-0.048803
Pf3D7_05_v3	124866	126764	Pf3D7_05_v3	PF3D7_0503000	50S ribosomal protein L28, apicoplast, putative	-0.073465	-0.090842	-0.063512	-0.059523	-0.107012
Pf3D7_05_v3	126814	128927	Pf3D7_05_v3	PF3D7_0503100	4-diphosphocytidyl-2-C-methyl-D-erythritol kinase, putative	-0.036686	-0.036497	-0.044774	-0.074472	-0.004357
Pf3D7_05_v3	130203	133642	Pf3D7_05_v3	PF3D7_0503200	conserved Plasmodium protein, unknown function	0.006638	0.04831	0.065961	0.259756	0.114492
Pf3D7_05_v3	134754	136180	Pf3D7_05_v3	PF3D7_0503300	serine/arginine-rich splicing factor 12	0.08638	0.044524	-0.024528	0.050136	-0.033904
Pf3D7_05_v3	140460	141721	Pf3D7_05_v3	PF3D7_0503400	actin-depolymerizing factor 1	-0.0015	0.035902	0.011151	0.167711	0.072307
Pf3D7_05_v3	142621	145673	Pf3D7_05_v3	PF3D7_0503500	protein kinase, putative	-0.018452	0.019489	-0.013182	-0.048759	-0.051341
Pf3D7_05_v3	146389	150381	Pf3D7_05_v3	PF3D7_0503600	myosin B	-0.057554	0.006752	-0.061362	0.174525	0.037986
Pf3D7_05_v3	151172	152634	Pf3D7_05_v3	PF3D7_0503800	60S ribosomal protein L31	0.114418	0.020479	-0.07734	0.131103	0.139053
Pf3D7_05_v3	153639	156307	Pf3D7_05_v3	PF3D7_0503900	conserved Plasmodium protein, unknown function	0.003615	0.055165	0.041974	0.143332	0.051022
Pf3D7_05_v3	157375	165218	Pf3D7_05_v3	PF3D7_0504000	cation transporting P-ATPase	0.008663	0.04556	-0.007006	0.023716	-0.010037
Pf3D7_05_v3	165400	166892	Pf3D7_05_v3	PF3D7_0504100	AN1-type zinc finger protein, putative	-0.03258	-0.014894	-0.063931	-0.024404	-0.028925
Pf3D7_05_v3	167399	169525	Pf3D7_05_v3	PF3D7_0504200	ATP-dependent RNA helicase DDX27, putative	-0.253148	-0.183205	-0.1796	-0.21885	-0.117399
Pf3D7_05_v3	169526	170840	Pf3D7_05_v3	PF3D7_0504300	conserved Plasmodium protein, unknown function	-0.219711	0.022555	0.00997	0.196073	0.094773
Pf3D7_05_v3	171900	174667	Pf3D7_05_v3	PF3D7_0504400	ATP-dependent helicase, putative	-0.07366	-0.014972	-0.022445	0.191099	0.124281
Pf3D7_05_v3	174739	176683	Pf3D7_05_v3	PF3D7_0504500	MOLO1 domain-containing protein, putative	-0.026408	0.093696	0.146575	0.032149	0.10795
Pf3D7_05_v3	177160	178805	Pf3D7_05_v3	PF3D7_0504600	2-oxoisovalerate dehydrogenase subunit beta, mitochondrial, putative	-0.068074	-0.020312	0.003477	0.289605	0.200003
Pf3D7_05_v3	180171	187641	Pf3D7_05_v3	PF3D7_0504700	centrosomal protein CEP120, putative	-0.187126	-0.058373	-0.057601	-0.316922	-0.164086
Pf3D7_05_v3	187642	204982	Pf3D7_05_v3	PF3D7_0504800	conserved Plasmodium protein, unknown function	-0.012486	0.015136	-0.006713	0.216432	0.146024
Pf3D7_05_v3	206200	208625	Pf3D7_05_v3	PF3D7_0504900	conserved protein, unknown function	-0.045338	0.104896	0.068428	0.130927	0.102123
Pf3D7_05_v3	208812	218439	Pf3D7_05_v3	PF3D7_0505000	MMS19-like protein, putative	-0.102012	-0.048879	-0.105128	0.025989	-0.009959
Pf3D7_05_v3	220589	229503	Pf3D7_05_v3	PF3D7_0505100	trafficking protein particle complex subunit 8, putative	0.011487	0.106819	0.070055	0.236188	0.17473
Pf3D7_05_v3	230445	232642	Pf3D7_05_v3	PF3D7_0505200	actin-like protein, putative	-0.025694	0.021405	-0.020617	0.196362	0.091129
Pf3D7_05_v3	233565	235896	Pf3D7_05_v3	PF3D7_0505300	UDP-N-acetylglucosamine transporter, putative	0.007559	0.033712	0.074029	-0.050788	0.046482
Pf3D7_05_v3	235897	238615	Pf3D7_05_v3	PF3D7_0505400	conserved protein, unknown function	-0.012867	-0.043874	-0.035857	0.096769	0.054818
Pf3D7_05_v3	239206	244130	Pf3D7_05_v3	PF3D7_0505500	DNA mismatch repair protein MSH6, putative	-0.048643	-0.002885	-0.036178	0.133162	0.029954
Pf3D7_05_v3	245683	247184	Pf3D7_05_v3	PF3D7_0505600	conserved protein, unknown function	0.027134	-0.000288	0.007908	0.138682	0.071465
Pf3D7_05_v3	247551	250825	Pf3D7_05_v3	PF3D7_0505700	conserved Plasmodium membrane protein, unknown function	0.003862	0.050777	-0.026175	0.300125	0.106697
Pf3D7_05_v3	251797	252856	Pf3D7_05_v3	PF3D7_0505800	small ubiquitin-related modifier	0.026013	-0.05227	-0.003302	0.111971	0.007127
Pf3D7_05_v3	254223	255767	Pf3D7_05_v3	PF3D7_0505900	mediator of RNA polymerase II transcription subunit 11, putative	0.066745	0.005168	0.029802	0.162642	0.084062
Pf3D7_05_v3	255975	257563	Pf3D7_05_v3	PF3D7_0506000	conserved Plasmodium protein, unknown function	-0.034718	-0.024012	-0.108014	-0.260976	-0.035085
Pf3D7_05_v3	257564	259081	Pf3D7_05_v3	PF3D7_0506100	60S ribosomal subunit protein L24, putative	-0.061053	-0.078026	-0.024216	0.209922	0.068337
Pf3D7_05_v3	259514	260854	Pf3D7_05_v3	PF3D7_0506200	TATA-box-binding protein	-0.077989	0.076002	0.103975	0.112569	0.109639
Pf3D7_05_v3	260855	262428	Pf3D7_05_v3	PF3D7_0506300	conserved protein, unknown function	-0.151302	-0.067592	-0.038022	-0.067385	-0.094567
Pf3D7_05_v3	262429	264175	Pf3D7_05_v3	PF3D7_0506400	conserved Plasmodium protein, unknown function	0.110507	-0.093828	-0.082568	0.038614	-0.028947
Pf3D7_05_v3	265345	278559	Pf3D7_05_v3	PF3D7_0506500	conserved Plasmodium protein, unknown function	-0.082748	0.000899	-0.019404	0.304111	0.152099
Pf3D7_05_v3	278560	279745	Pf3D7_05_v3	PF3D7_0506600	histone deacetylase, putative, pseudogene	-0.165393	-0.023829	-0.009293	0.058535	-0.005857
Pf3D7_05_v3	280636	283595	Pf3D7_05_v3	PF3D7_0506700	GTPase-activating protein, putative	-0.14908	-0.010974	-0.044342	-0.204429	-0.061124
Pf3D7_05_v3	284441	288273	Pf3D7_05_v3	PF3D7_0506800	transcription factor 25, putative	-0.011711	0.019683	-0.012729	0.098601	0.086268
Pf3D7_05_v3	288526	291305	Pf3D7_05_v3	PF3D7_0506900	rhomboid protease ROM4	-0.088495	-0.028545	-0.00837	0.103453	0.035244
Pf3D7_05_v3	294418	296153	Pf3D7_05_v3	PF3D7_0507100	60S ribosomal protein L4	0.03638	0.008605	-0.012207	0.069001	0.093323
Pf3D7_05_v3	298177	300986	Pf3D7_05_v3	PF3D7_0507200	subtilisin-like protease 3	0.039582	-0.028037	0.004256	0.245068	0.147124
Pf3D7_05_v3	301680	304861	Pf3D7_05_v3	PF3D7_0507300	subtilisin-like ookinete protein SOPT	0.089588	0.062745	0.054527	0.254208	0.16223
Pf3D7_05_v3	305711	306672	Pf3D7_05_v3	PF3D7_0507400	conserved Plasmodium protein, unknown function	0.073499	0.041604	0.07719	0.004494	0.071138
Pf3D7_05_v3	307240	309806	Pf3D7_05_v3	PF3D7_0507500	subtilisin-like protease 1	0.01334	-0.03179	-0.048482	-0.028742	-0.018646
Pf3D7_05_v3	312949	315407	Pf3D7_05_v3	PF3D7_0507600	protein CAF40, putative	-0.111566	0.023921	0.003905	0.104308	0.028383
Pf3D7_05_v3	316516	318611	Pf3D7_05_v3	PF3D7_0507700	nuclear protein localization protein 4, putative	0.043096	-0.018045	-0.017477	0.026409	-0.027761
Pf3D7_05_v3	321989	327072	Pf3D7_05_v3	PF3D7_0507800	conserved protein, unknown function	0.117414	0.154645	0.138722	0.196011	0.122527
Pf3D7_05_v3	328492	329965	Pf3D7_05_v3	PF3D7_0508000	6-cysteine protein	0.073003	-0.003538	0.013138	0.052024	0.038828
Pf3D7_05_v3	331430	336954	Pf3D7_05_v3	PF3D7_0508100	SET domain protein, putative	-0.07089	-0.022058	-0.026446	0.085416	-0.026563
Pf3D7_05_v3	337176	339275	Pf3D7_05_v3	PF3D7_0508200	longevity-assurance (LAG1) protein, putative	-0.196993	-0.024827	-0.02865	-0.055407	-0.035314
Pf3D7_05_v3	341955	343483	Pf3D7_05_v3	PF3D7_0508300	triose phosphate transporter	-0.146976	-0.057703	-0.038072	0.029624	-0.001551
Pf3D7_05_v3	344681	346981	Pf3D7_05_v3	PF3D7_0508400	conserved protein, unknown function	0.007384	-0.064877	-0.019058	0.157747	0.074364
Pf3D7_05_v3	346982	355289	Pf3D7_05_v3	PF3D7_0508500	guanidine nucleotide exchange factor	-0.041478	0.070005	0.039463	0.07374	0.056366
Pf3D7_05_v3	355972	357260	Pf3D7_05_v3	PF3D7_0508600	conserved protein, unknown function	-0.008384	0.088019	0.043631	0.106839	0.088378
Pf3D7_05_v3	358011	362983	Pf3D7_05_v3	PF3D7_0508700	pre-mRNA-processing ATP-dependent RNA helicase PRP5, putative	-0.033814	0.036294	0.050693	-0.064564	0.017403
Pf3D7_05_v3	363338	364692	Pf3D7_05_v3	PF3D7_0508800	single-stranded DNA-binding protein	-0.029997	0.037278	0.049932	0.21515	0.132657
Pf3D7_05_v3	366772	376640	Pf3D7_05_v3	PF3D7_0508900	conserved Plasmodium protein, unknown function	-0.010444	0.011457	0.03559	0.164513	0.100648
Pf3D7_05_v3	376641	378702	Pf3D7_05_v3	PF3D7_0509000	alpha-soluble NSF attachment protein, putative	-0.046457	-0.097943	-0.096332	0.245202	0.076395
Pf3D7_05_v3	380827	386453	Pf3D7_05_v3	PF3D7_0509100	structural maintenance of chromosomes protein 4, putative	0.00856	0.031488	0.076383	0.035259	0.047699
Pf3D7_05_v3	386706	388600	Pf3D7_05_v3	PF3D7_0509200	leucine-rich repeat protein	0.056078	0.044272	0.022361	0.407797	0.32087
Pf3D7_05_v3	388601	389441	Pf3D7_05_v3	PF3D7_0509300	conserved Plasmodium protein, unknown function	-0.007055	0.040706	0.041036	0.035325	0.018376
Pf3D7_05_v3	389664	399247	Pf3D7_05_v3	PF3D7_0509400	RNA polymerase I	0.093032	0.108096	0.070499	0.116247	0.165559
Pf3D7_05_v3	401187	403021	Pf3D7_05_v3	PF3D7_0509500	ERCC4 domain-containing protein, putative	-0.051968	0.015491	0.001856	0.03679	0.088034
Pf3D7_05_v3	403092	405801	Pf3D7_05_v3	PF3D7_0509600	asparagine--tRNA ligase	0.061392	0.161919	0.151169	0.138856	0.181053
Pf3D7_05_v3	405802	408147	Pf3D7_05_v3	PF3D7_0509700	conserved Plasmodium protein, unknown function	0.015324	-0.03252	0.086632	0.099326	0.1464
Pf3D7_05_v3	410018	415558	Pf3D7_05_v3	PF3D7_0509800	phosphatidylinositol 4-kinase	0.033481	0.097716	0.133072	0.166581	0.131581
Pf3D7_05_v3	416115	417559	Pf3D7_05_v3	PF3D7_0509900	conserved protein, unknown function	0.059218	0.05985	0.063768	0.034367	0.051355
Pf3D7_05_v3	417886	421675	Pf3D7_05_v3	PF3D7_0510000	conserved Plasmodium protein, unknown function	0.044398	0.098114	0.099622	0.145211	0.143813
Pf3D7_05_v3	422496	430603	Pf3D7_05_v3	PF3D7_0510100	conserved protein, unknown function	0.031316	0.047776	0.073774	-0.051531	0.034742
Pf3D7_05_v3	437245	439988	Pf3D7_05_v3	PF3D7_0510200	peptidyl-prolyl cis-trans isomerase	-0.010805	0.098528	0.098737	0.016973	0.059423
Pf3D7_05_v3	440529	442129	Pf3D7_05_v3	PF3D7_0510300	stripes inner membrane complex protein, putative	-0.009155	0.068724	0.093638	-0.082039	-0.026126
Pf3D7_05_v3	444010	445781	Pf3D7_05_v3	PF3D7_0510400	PDCD2 domain-containing protein, putative	-0.03155	0.058928	-0.008907	-0.127281	-0.058176
Pf3D7_05_v3	445782	448752	Pf3D7_05_v3	PF3D7_0510500	topoisomerase I	-0.030363	0.003119	0.018235	-0.066112	-0.045834
Pf3D7_05_v3	459051	460594	Pf3D7_05_v3	PF3D7_0510700	conserved Plasmodium protein, unknown function	-0.031625	0.027604	-0.00811	0.00325	0.005283
Pf3D7_05_v3	460767	464649	Pf3D7_05_v3	PF3D7_0510800	WD repeat-containing protein, putative	0.163552	0.119096	0.083258	0.187619	0.178419
Pf3D7_05_v3	467335	468350	Pf3D7_05_v3	PF3D7_0511000	translationally-controlled tumor protein homolog	-0.049738	-0.078734	-0.001058	-0.047608	0.010372
Pf3D7_05_v3	469026	470092	Pf3D7_05_v3	PF3D7_0511100	conserved Plasmodium protein, unknown function	0.04442	0.001973	0.039164	0.176806	0.099964
Pf3D7_05_v3	470805	474272	Pf3D7_05_v3	PF3D7_0511200	stearoyl-CoA desaturase	-0.013716	-0.132391	0.083056	-0.007592	-0.01627
Pf3D7_05_v3	474273	479132	Pf3D7_05_v3	PF3D7_0511300	MORN repeat protein, putative	-0.011974	0.092073	0.070328	-0.066812	0.033926
Pf3D7_05_v3	481173	482818	Pf3D7_05_v3	PF3D7_0511400	conserved Plasmodium protein, unknown function	0.00896	0.116203	0.090616	0.13548	0.1604
Pf3D7_05_v3	486352	517023	Pf3D7_05_v3	PF3D7_0511500	RNA pseudouridylate synthase, putative	-0.109088	0.018491	0.024598	0.277441	0.119735
Pf3D7_05_v3	517024	518135	Pf3D7_05_v3	PF3D7_0511600	apical rhoptry neck protein	-0.034879	0.078938	0.017688	0.231393	0.103734
Pf3D7_05_v3	518879	520328	Pf3D7_05_v3	PF3D7_0511700	EKC/KEOPS complex subunit CGI121	-0.020153	0.011421	0.024121	0.152175	0.048054
Pf3D7_05_v3	520470	522943	Pf3D7_05_v3	PF3D7_0511800	inositol-3-phosphate synthase	-0.084458	0.081415	0.074624	-0.047279	0.057107
Pf3D7_05_v3	524776	527428	Pf3D7_05_v3	PF3D7_0511900	conserved Plasmodium protein, unknown function	0.004248	0.034494	0.055929	0.016875	0.031397
Pf3D7_05_v3	527429	528756	Pf3D7_05_v3	PF3D7_0512000	prefoldin subunit 6, putative	0.103662	-0.081092	-0.056499	-0.026936	-0.129048
Pf3D7_05_v3	528757	529659	Pf3D7_05_v3	PF3D7_0512100	conserved protein, unknown function	0.017054	0.017232	-0.008612	-0.170008	-0.102603
Pf3D7_05_v3	529684	532151	Pf3D7_05_v3	PF3D7_0512200	glutathione synthetase	-0.03241	0.014749	0.075917	-0.01622	-0.015095
Pf3D7_05_v3	533306	534588	Pf3D7_05_v3	PF3D7_0512300	CDK-activating kinase assembly factor MAT1	-0.002774	0.001935	-0.092986	-0.217551	-0.073069
Pf3D7_05_v3	536023	537227	Pf3D7_05_v3	PF3D7_0512400	conserved Plasmodium protein, unknown function	0.16805	0.160907	0.077731	-0.136136	-0.021218
Pf3D7_05_v3	539481	542843	Pf3D7_05_v3	PF3D7_0512500	conserved Plasmodium protein, unknown function	-0.032246	0.014743	0.042038	0.063618	0.118004
Pf3D7_05_v3	544290	546243	Pf3D7_05_v3	PF3D7_0512600	ras-related protein Rab-1B	-0.125176	-0.016235	-0.028658	0.05795	-0.00483
Pf3D7_05_v3	546484	547829	Pf3D7_05_v3	PF3D7_0512700	orotate phosphoribosyltransferase	-0.073496	0.004606	0.001981	0.261009	0.044093
Pf3D7_05_v3	548156	553590	Pf3D7_05_v3	PF3D7_0512800	conserved Plasmodium protein, unknown function	-0.069554	0.099896	0.083399	0.303831	0.154161
Pf3D7_05_v3	553740	555025	Pf3D7_05_v3	PF3D7_0512900	AKAP-like protein	-0.009036	0.083686	0.044687	0.063476	0.079369
Pf3D7_05_v3	555026	556323	Pf3D7_05_v3	PF3D7_0513000	conserved protein, unknown function	-0.048851	0.009149	0.05042	-0.114878	0.031578
Pf3D7_05_v3	556789	558262	Pf3D7_05_v3	PF3D7_0513100	conserved protein, unknown function	0.03845	-0.030881	-0.018232	0.144611	0.054164
Pf3D7_05_v3	559263	568634	Pf3D7_05_v3	PF3D7_0513200	conserved Plasmodium protein, unknown function	-0.035163	0.006988	0.027097	0.05195	0.075754
Pf3D7_05_v3	568932	570169	Pf3D7_05_v3	PF3D7_0513300	purine nucleoside phosphorylase	-0.144215	-0.060412	-0.058986	-0.018495	-0.081154
Pf3D7_05_v3	570808	572911	Pf3D7_05_v3	PF3D7_0513400	GTP-binding protein, putative	-0.08474	0.069803	-0.007393	-0.082736	-0.037073
Pf3D7_05_v3	573338	574498	Pf3D7_05_v3	PF3D7_0513500	mitochondrial import inner membrane translocase subunit TIM16, putative	0.019889	0.045604	0.059099	0.119261	0.101816
Pf3D7_05_v3	574691	578755	Pf3D7_05_v3	PF3D7_0513600	deoxyribodipyrimidine photo-lyase, putative	-0.009807	0.008007	0.010251	0.036545	-0.011694
Pf3D7_05_v3	580977	584374	Pf3D7_05_v3	PF3D7_0513700	secreted ookinete protein, putative	-0.013461	-0.029488	0.014054	0.091794	0.081631
Pf3D7_05_v3	585107	586230	Pf3D7_05_v3	PF3D7_0513800	ras-related protein Rab-1A	-0.047419	0.047277	0.07138	-0.195351	-0.010213
Pf3D7_05_v3	587502	588799	Pf3D7_05_v3	PF3D7_0513900	conserved protein, unknown function	0.091454	0.023027	0.009157	-0.000767	0.038305
Pf3D7_05_v3	588800	591019	Pf3D7_05_v3	PF3D7_0514000	tubulin--tyrosine ligase, putative	-0.043065	0.012099	0.016447	0.009709	-0.008351
Pf3D7_05_v3	591088	595913	Pf3D7_05_v3	PF3D7_0514100	ATP-dependent DNA helicase UvrD	0.099265	0.080607	0.071917	0.168133	0.043648
Pf3D7_05_v3	596568	599671	Pf3D7_05_v3	PF3D7_0514200	conserved Plasmodium protein, unknown function	0.047784	0.013283	-0.069644	-0.01006	-0.056319
Pf3D7_05_v3	599797	603683	Pf3D7_05_v3	PF3D7_0514300	aspartate--tRNA ligase, putative	0.172744	0.064774	0.075156	0.082575	0.104006
Pf3D7_05_v3	604777	606580	Pf3D7_05_v3	PF3D7_0514500	conserved Plasmodium membrane protein, unknown function	0.02707	0.018028	0.034808	-0.062988	-0.019586
Pf3D7_05_v3	606855	608701	Pf3D7_05_v3	PF3D7_0514600	ribose-5-phosphate isomerase, putative	-0.121209	-0.006455	0.085965	0.061552	-0.013945
Pf3D7_05_v3	609839	615021	Pf3D7_05_v3	PF3D7_0514700	MORN repeat protein, putative	-0.02408	0.028434	0.03644	0.099885	0.017156
Pf3D7_05_v3	615032	618243	Pf3D7_05_v3	PF3D7_0514800	inositol polyphosphate multikinase, putative	0.053613	0.006499	-0.000602	0.202731	0.083847
Pf3D7_05_v3	618379	620195	Pf3D7_05_v3	PF3D7_0514900	conserved Plasmodium protein, unknown function	0.001898	-0.024217	-0.021927	-0.003912	-0.055711
Pf3D7_05_v3	620560	623606	Pf3D7_05_v3	PF3D7_0515000	pre-mRNA-splicing factor CWC2, putative	-0.103838	-0.017086	-0.009362	0.041904	-0.01921
Pf3D7_05_v3	624469	626731	Pf3D7_05_v3	PF3D7_0515100	rhomboid protease ROM9	0.004499	-0.029684	0.035586	0.046728	-0.003446
Pf3D7_05_v3	627048	628211	Pf3D7_05_v3	PF3D7_0515200	conserved Plasmodium protein, unknown function	0.12847	-0.028223	-0.048485	0.160164	0.100786
Pf3D7_05_v3	628731	635632	Pf3D7_05_v3	PF3D7_0515300	phosphatidylinositol 3-kinase	0.043149	-0.010209	-0.00558	0.16515	0.0669
Pf3D7_05_v3	637104	640631	Pf3D7_05_v3	PF3D7_0515400	conserved protein, unknown function	0.10774	0.151125	0.128028	-0.051962	0.089088
Pf3D7_05_v3	640887	644935	Pf3D7_05_v3	PF3D7_0515500	amino acid transporter, putative	0.020236	-0.027361	-0.073812	-0.158506	-0.050648
Pf3D7_05_v3	646409	652356	Pf3D7_05_v3	PF3D7_0515600	conserved Plasmodium protein, unknown function	0.035233	-0.067633	-0.063685	0.082345	-0.020755
Pf3D7_05_v3	653716	655586	Pf3D7_05_v3	PF3D7_0515700	glideosome-associated protein 40, putative	0.081524	0.014298	0.062781	0.00416	-0.008075
Pf3D7_05_v3	658173	658927	Pf3D7_05_v3	PF3D7_0515800	BolA-like protein, putative	-0.016925	-0.025353	0.013073	-0.104716	-0.110876
Pf3D7_05_v3	659900	661386	Pf3D7_05_v3	PF3D7_0515900	NLI interacting factor-like phosphatase, putative	0.078268	0.053504	0.037249	0.044157	0.014495
Pf3D7_05_v3	663301	667167	Pf3D7_05_v3	PF3D7_0516000	RAP protein, putative	0.019445	-0.050076	-0.003972	0.091639	-0.014133
Pf3D7_05_v3	667236	675111	Pf3D7_05_v3	PF3D7_0516100	cation-transporting ATPase 1	0.04658	0.038001	0.11695	-0.038784	-0.054303
Pf3D7_05_v3	675559	676864	Pf3D7_05_v3	PF3D7_0516200	40S ribosomal protein S11	-0.010559	-0.083048	0.043444	0.092751	-0.029271
Pf3D7_05_v3	678660	681192	Pf3D7_05_v3	PF3D7_0516300	tRNA pseudouridine synthase, putative	-0.096903	-0.092046	-0.090648	-0.049914	-0.131651
Pf3D7_05_v3	681193	682687	Pf3D7_05_v3	PF3D7_0516400	phosducin-like protein 1, putative	-0.015425	-0.012908	-0.023497	0.081957	-0.006888
Pf3D7_05_v3	683458	686109	Pf3D7_05_v3	PF3D7_0516500	major facilitator superfamily domain-containing protein, putative	0.088452	0.02044	0.023969	-0.085718	-0.148766
Pf3D7_05_v3	686560	691892	Pf3D7_05_v3	PF3D7_0516600	sporozoite surface antigen MB2	0.073814	-0.089823	-0.111916	0.195339	0.06779
Pf3D7_05_v3	694242	699028	Pf3D7_05_v3	PF3D7_0516700	ubiquitin carboxyl-terminal hydrolase 2, putative	-0.032723	-0.042363	0.010676	-0.198718	-0.065137
Pf3D7_05_v3	699870	707506	Pf3D7_05_v3	PF3D7_0516800	AP2 domain transcription factor AP2-O2, putative	0.04038	0.016907	-0.028609	0.265422	0.163367
Pf3D7_05_v3	712512	714022	Pf3D7_05_v3	PF3D7_0516900	60S ribosomal protein L2	0.027353	0.0489	0.001098	-0.059462	-0.019255
Pf3D7_05_v3	715515	716925	Pf3D7_05_v3	PF3D7_0517000	60S ribosomal protein L12, putative	0.039004	0.007614	-0.031659	0.01571	0.025591
Pf3D7_05_v3	718175	720105	Pf3D7_05_v3	PF3D7_0517100	conserved protein, unknown function	-0.015557	-0.021861	-0.037998	-0.014807	-0.019901
Pf3D7_05_v3	720493	722891	Pf3D7_05_v3	PF3D7_0517200	conserved Plasmodium protein, unknown function	0.073801	-0.126101	-0.094217	-0.205087	-0.145966
Pf3D7_05_v3	724431	726001	Pf3D7_05_v3	PF3D7_0517300	serine/arginine-rich splicing factor 1	0.009458	-0.079191	0.059408	-0.199293	-0.062314
Pf3D7_05_v3	731157	735412	Pf3D7_05_v3	PF3D7_0517400	FACT complex subunit SPT16, putative	-0.115018	-0.01678	0.006824	-0.179065	-0.120578
Pf3D7_05_v3	735637	738650	Pf3D7_05_v3	PF3D7_0517500	UTP--glucose-1-phosphate uridylyltransferase, putative	-0.030207	-0.012642	-0.003985	-0.143761	-0.063782
Pf3D7_05_v3	739906	741284	Pf3D7_05_v3	PF3D7_0517600	F-actin-capping protein subunit beta, putative	-0.003587	-0.011249	0.000544	-0.216748	-0.08979
Pf3D7_05_v3	742929	745563	Pf3D7_05_v3	PF3D7_0517700	eukaryotic translation initiation factor 3 subunit B, putative	0.083032	0.016246	0.006094	-0.008	0.06817
Pf3D7_05_v3	745564	746884	Pf3D7_05_v3	PF3D7_0517800	apicortin, putative	0.048425	0.005317	-0.007944	-0.074923	-0.016128
Pf3D7_05_v3	747545	749927	Pf3D7_05_v3	PF3D7_0517900	zinc finger protein, putative	0.037557	-0.03594	-0.007819	0.178232	0.158214
Pf3D7_05_v3	750411	752685	Pf3D7_05_v3	PF3D7_0518000	NOSIP domain-containing protein, putative	0.106486	0.077839	0.082084	0.144365	0.139994
Pf3D7_05_v3	753048	757794	Pf3D7_05_v3	PF3D7_0518100	protein AMR2	0.133078	0.174993	0.089987	0.2916	0.257656
Pf3D7_05_v3	758253	759148	Pf3D7_05_v3	PF3D7_0518200	SWIB/MDM2 domain-containing protein	0.047511	-0.041372	-0.025218	0.137165	0.091305
Pf3D7_05_v3	759581	761248	Pf3D7_05_v3	PF3D7_0518300	proteasome subunit beta type-1, putative	0.057214	-0.063412	-0.010594	0.182541	0.100004
Pf3D7_05_v3	761853	763042	Pf3D7_05_v3	PF3D7_0518400	cyclin, putative	0.015658	0.007431	0.007465	0.108278	0.04236
Pf3D7_05_v3	763282	767153	Pf3D7_05_v3	PF3D7_0518500	ATP-dependent RNA helicase DDX23, putative	0.027838	0.052269	0.08244	0.125797	0.126093
Pf3D7_05_v3	769060	773390	Pf3D7_05_v3	PF3D7_0518600	WD repeat-containing protein 26, putative	0.083617	0.024426	0.048391	0.10356	0.065591
Pf3D7_05_v3	773825	780688	Pf3D7_05_v3	PF3D7_0518700	mRNA-binding protein PUF1	-0.171732	-0.003341	0.047648	-0.000459	0.065897
Pf3D7_05_v3	783388	785241	Pf3D7_05_v3	PF3D7_0518800	secreted ookinete protein, putative	-0.040043	-0.048595	-0.034321	-0.124705	-0.084138
Pf3D7_05_v3	785414	786815	Pf3D7_05_v3	PF3D7_0518900	conserved protein, unknown function	0.014222	0.005627	0.003035	0.108066	0.066372
Pf3D7_05_v3	788349	789730	Pf3D7_05_v3	PF3D7_0519000	histone RNA hairpin-binding protein, putative	-0.019853	-0.136266	-0.135085	0.059219	-0.02282
Pf3D7_05_v3	790149	791023	Pf3D7_05_v3	PF3D7_0519100	50S ribosomal protein L14, mitochondrial, putative	-0.01512	0.040169	-0.06078	0.075258	0.018188
Pf3D7_05_v3	791469	793186	Pf3D7_05_v3	PF3D7_0519200	V-type proton ATPase 16 kDa proteolipid subunit	-0.072207	-0.074362	-0.032756	-0.107821	-0.07273
Pf3D7_05_v3	795277	797723	Pf3D7_05_v3	PF3D7_0519300	protoheme IX farnesyltransferase, putative	-0.043367	-0.102622	-0.11054	-0.048433	-0.071817
Pf3D7_05_v3	797786	799025	Pf3D7_05_v3	PF3D7_0519400	40S ribosomal protein S24	-0.098568	-0.064783	-0.160276	-0.038706	-0.065249
Pf3D7_05_v3	801200	809377	Pf3D7_05_v3	PF3D7_0519500	CCR4 domain-containing protein 1, putative	0.039855	0.059728	0.10031	0.150316	0.14178
Pf3D7_05_v3	812398	815165	Pf3D7_05_v3	PF3D7_0519600	zinc finger protein, putative	0.059344	-0.030324	-0.044118	-0.039248	-0.009776
Pf3D7_05_v3	816816	819389	Pf3D7_05_v3	PF3D7_0519700	FoP domain-containing protein, putative	0.12477	-0.098542	-0.074672	0.169665	-0.019491
Pf3D7_05_v3	820469	823158	Pf3D7_05_v3	PF3D7_0519800	EELM2 domain-containing protein, putative	-0.099836	-0.026137	-0.025744	-0.082322	-0.040445
Pf3D7_05_v3	825585	827662	Pf3D7_05_v3	PF3D7_0519900	conserved protein, unknown function	0.057233	-0.018356	0.004738	-0.051757	0.005071
Pf3D7_05_v3	828703	830133	Pf3D7_05_v3	PF3D7_0520000	40S ribosomal protein S9, putative	0.056575	-0.033857	-0.002191	-0.077219	-0.1027
Pf3D7_05_v3	831367	834593	Pf3D7_05_v3	PF3D7_0520100	protein phosphatase PPM9, putative	-0.031	-0.006114	0.03047	-0.0602	-0.078706
Pf3D7_05_v3	835064	837657	Pf3D7_05_v3	PF3D7_0520200	mediator of RNA polymerase II transcription subunit 17, putative	-0.022124	0.000481	0.002492	-0.163302	-0.100586
Pf3D7_05_v3	838178	839333	Pf3D7_05_v3	PF3D7_0520300	U6 snRNA-associated Sm-like protein LSm2, putative	0.09629	0.042257	-0.099311	-0.019678	-0.056142
Pf3D7_05_v3	839405	840810	Pf3D7_05_v3	PF3D7_0520400	single-stranded DNA-binding protein, putative	0.056383	0.062494	0.01414	-0.104725	-0.047303
Pf3D7_05_v3	841473	842905	Pf3D7_05_v3	PF3D7_0520500	phosphomethylpyrimidine kinase, putative	0.022249	0.044721	0.01064	-0.097895	0.01665
Pf3D7_05_v3	843336	845067	Pf3D7_05_v3	PF3D7_0520600	bis(5'-nucleosyl)-tetraphosphatase [asymmetrical]	0.027737	-0.021201	-0.002023	-0.341082	-0.142995
Pf3D7_05_v3	845593	849017	Pf3D7_05_v3	PF3D7_0520700	CDC73 domain-containing protein, putative	0.079119	0.074266	0.12646	0.06103	0.121443
Pf3D7_05_v3	849612	856276	Pf3D7_05_v3	PF3D7_0520800	conserved protein, unknown function	0.023563	-0.079041	0.005127	-0.088648	-0.067886
Pf3D7_05_v3	856788	858727	Pf3D7_05_v3	PF3D7_0520900	adenosylhomocysteinase	-0.014982	-0.048651	-0.107748	-0.211859	-0.122422
Pf3D7_05_v3	859123	861313	Pf3D7_05_v3	PF3D7_0521000	conserved Plasmodium protein, unknown function	0.031066	0.012461	-0.006784	-0.059215	-0.007868
Pf3D7_05_v3	861680	867833	Pf3D7_05_v3	PF3D7_0521100	conserved Plasmodium protein, unknown function	0.046637	-0.005455	-0.017165	-0.142097	-0.002272
Pf3D7_05_v3	868642	870031	Pf3D7_05_v3	PF3D7_0521200	conserved protein, unknown function	-0.114278	-0.092015	-0.072854	0.050193	-0.022211
Pf3D7_05_v3	870032	874820	Pf3D7_05_v3	PF3D7_0521300	zinc finger protein, putative	-0.016495	-0.019729	-0.061407	-0.05094	-0.018574
Pf3D7_05_v3	875623	877811	Pf3D7_05_v3	PF3D7_0521400	conserved protein, unknown function	0.074865	-0.015508	-0.033783	-0.316254	-0.063519
Pf3D7_05_v3	877818	879913	Pf3D7_05_v3	PF3D7_0521500	ribosomal large subunit pseudouridylate synthase, putative	0.072577	0.020824	-0.028459	0.088018	0.043015
Pf3D7_05_v3	882126	885151	Pf3D7_05_v3	PF3D7_0521700	ATP-dependent RNA helicase DDX1, putative	-0.034252	-0.084251	-0.110107	-0.089769	0.009926
Pf3D7_05_v3	885464	888444	Pf3D7_05_v3	PF3D7_0521800	AFG1-like ATPase, putative	-0.0367	0.052458	0.009837	0.090685	0.079988
Pf3D7_05_v3	888445	895394	Pf3D7_05_v3	PF3D7_0521900	conserved Plasmodium protein, unknown function	-0.020629	0.010754	-0.010041	-0.065378	-0.011753
Pf3D7_05_v3	895768	897190	Pf3D7_05_v3	PF3D7_0522000	conserved Plasmodium protein, unknown function	0.067255	0.076205	0.086441	-0.09807	-0.015084
Pf3D7_05_v3	897215	900006	Pf3D7_05_v3	PF3D7_0522100	conserved Plasmodium protein, unknown function	-0.10365	-0.009072	-0.046442	-0.042344	-0.029507
Pf3D7_05_v3	901164	902393	Pf3D7_05_v3	PF3D7_0522200	transcription initiation factor TFIID subunit 10, putative	-0.114831	-0.15133	-0.133826	-0.145287	-0.086081
Pf3D7_05_v3	902394	905094	Pf3D7_05_v3	PF3D7_0522300	18S rRNA (guanine-N(7))-methyltransferase, putative	-0.202494	-0.032272	-0.083336	-0.169824	-0.120934
Pf3D7_05_v3	907587	936565	Pf3D7_05_v3	PF3D7_0522400	conserved Plasmodium protein, unknown function	-0.044861	0.032967	0.044157	-0.010116	-0.020609
Pf3D7_05_v3	936981	938287	Pf3D7_05_v3	PF3D7_0522500	50S ribosomal protein L17, apicoplast, putative	-0.012351	0.021458	0.020989	-0.102684	-0.040983
Pf3D7_05_v3	939999	941950	Pf3D7_05_v3	PF3D7_0522600	inner membrane complex protein	-0.016225	0.187881	0.043224	-0.008401	0.037191
Pf3D7_05_v3	942517	944028	Pf3D7_05_v3	PF3D7_0522700	iron-sulfur assembly protein	-0.074652	0.045802	0.045809	0.065204	0.04618
Pf3D7_05_v3	944029	945181	Pf3D7_05_v3	PF3D7_0522800	pre-mRNA-splicing factor BUD31, putative	-0.25098	0.070252	0.047295	0.055343	0.09131
Pf3D7_05_v3	948701	953859	Pf3D7_05_v3	PF3D7_0522900	zinc finger protein, putative	0.095317	0.035127	-0.049464	-0.254356	-0.156507
Pf3D7_05_v3	957640	962399	Pf3D7_05_v3	PF3D7_0523000	multidrug resistance protein 1	-0.076502	0.004204	-0.021234	0.021264	-0.052016
Pf3D7_05_v3	962977	965294	Pf3D7_05_v3	PF3D7_0523100	mitochondrial-processing peptidase subunit alpha, putative	0.021088	0.027636	0.042803	-0.076841	-0.038172
Pf3D7_05_v3	965873	969987	Pf3D7_05_v3	PF3D7_0523200	heptatricopeptide repeat-containing protein, putative	-0.022915	-0.02351	-0.051891	-0.084309	-0.054219
Pf3D7_05_v3	970016	971212	Pf3D7_05_v3	PF3D7_0523300	cytochrome c oxidase subunit ApiCOX18, putative	-0.005927	-0.040042	-0.051081	-0.125969	-0.096452
Pf3D7_05_v3	973268	976126	Pf3D7_05_v3	PF3D7_0523400	DnaJ protein, putative	0.056454	0.158267	0.219859	-0.013923	0.068482
Pf3D7_05_v3	976440	978065	Pf3D7_05_v3	PF3D7_0523500	dynein light chain Tctex-type, putative	-0.025933	0.031718	0.048806	-0.094678	-0.003212
Pf3D7_05_v3	978415	980120	Pf3D7_05_v3	PF3D7_0523600	conserved protein, unknown function	0.047571	-0.127479	-0.106189	-0.001608	0.04218
Pf3D7_05_v3	980504	985604	Pf3D7_05_v3	PF3D7_0523700	conserved Plasmodium membrane protein, unknown function	0.00157	0.030189	-0.057851	-0.01864	0.050157
Pf3D7_05_v3	989755	992309	Pf3D7_05_v3	PF3D7_0523800	divalent metal transporter, putative	-0.057657	-0.070057	-0.07918	-0.110237	-0.063824
Pf3D7_05_v3	993183	994857	Pf3D7_05_v3	PF3D7_0523900	MerC domain-containing protein, putative	-0.035156	-0.033943	0.005749	0.070622	-0.004077
Pf3D7_05_v3	998503	1002374	Pf3D7_05_v3	PF3D7_0524000	karyopherin beta	-0.024498	-0.021156	-0.109769	-0.100455	-0.084584
Pf3D7_05_v3	1003987	1008358	Pf3D7_05_v3	PF3D7_0524100	conserved Plasmodium protein, unknown function	0.062065	-0.031975	-0.013479	0.057025	0.049831
Pf3D7_05_v3	1008386	1009654	Pf3D7_05_v3	PF3D7_0524200	conserved Plasmodium membrane protein, unknown function	0.020387	-0.086229	-0.051247	-0.010016	-0.018122
Pf3D7_05_v3	1010701	1012421	Pf3D7_05_v3	PF3D7_0524300	conserved Plasmodium protein, unknown function	-0.107048	0.036476	0.032789	0.002386	-0.019845
Pf3D7_05_v3	1013203	1014800	Pf3D7_05_v3	PF3D7_0524400	ribosome-interacting GTPase 1, putative	0.051008	-0.011761	-0.015952	0.089905	0.070783
Pf3D7_05_v3	1017559	1018832	Pf3D7_05_v3	PF3D7_0524600	50S ribosomal protein L12, apicoplast, putative	-0.017792	-0.017375	-0.06696	0.036523	0.027629
Pf3D7_05_v3	1019335	1020152	Pf3D7_05_v3	PF3D7_0524700	mitochondrial import receptor subunit TOM22, putative	-0.047996	-0.018761	-0.020527	0.029803	-0.096498
Pf3D7_05_v3	1021158	1024557	Pf3D7_05_v3	PF3D7_0524800	ubiquitin fusion degradation protein 1, putative	-0.016619	-0.174492	-0.115531	-0.317031	-0.164272
Pf3D7_05_v3	1027146	1030612	Pf3D7_05_v3	PF3D7_0524900	S-adenosyl-L-methionine-dependent tRNA 4-demethylwyosine synthase, putative	-0.087844	-0.09437	-0.062302	-0.130726	-0.050531
Pf3D7_05_v3	1035979	1038593	Pf3D7_05_v3	PF3D7_0525000	zinc finger protein, putative	-0.029671	0.004716	-0.050909	0.05655	0.009186
Pf3D7_05_v3	1041495	1044016	Pf3D7_05_v3	PF3D7_0525100	acyl-CoA synthetase	-0.068495	-0.084225	-0.130368	0.169997	0.023911
Pf3D7_05_v3	1045212	1051503	Pf3D7_05_v3	PF3D7_0525200	structural maintenance of chromosomes protein 6, putative	0.043491	-0.032033	-0.078877	0.10345	0.040084
Pf3D7_05_v3	1052218	1054163	Pf3D7_05_v3	PF3D7_0525300	conserved protein, unknown function	-0.025145	-0.040411	-0.103097	-0.049303	0.00878
Pf3D7_05_v3	1057401	1059304	Pf3D7_05_v3	PF3D7_0525400	7-helix-1 protein	-0.098541	-0.070328	-0.046254	-0.05124	-0.099373
Pf3D7_05_v3	1059668	1065759	Pf3D7_05_v3	PF3D7_0525500	WD repeat-containing protein, putative	-0.054991	-0.111828	-0.086174	-0.14827	-0.11224
Pf3D7_05_v3	1066276	1067962	Pf3D7_05_v3	PF3D7_0525600	RNA methyltransferase, putative	-0.016238	-0.040701	-0.019147	-0.103533	-0.052094
Pf3D7_05_v3	1068266	1069535	Pf3D7_05_v3	PF3D7_0525700	conserved protein, unknown function	-0.055905	-0.049699	-0.146442	0.037302	0.077776
Pf3D7_05_v3	1070997	1072399	Pf3D7_05_v3	PF3D7_0525800	inner membrane complex protein 1g, putative	-0.079978	-0.053967	0.008795	-0.030423	-1.8e-05
Pf3D7_05_v3	1073396	1075778	Pf3D7_05_v3	PF3D7_0525900	NIMA related kinase 2	-0.003587	0.044203	0.071822	0.188941	0.061958
Pf3D7_05_v3	1075779	1078583	Pf3D7_05_v3	PF3D7_0526000	RAP protein, putative	0.132143	0.011848	0.0763	0.123518	0.083908
Pf3D7_05_v3	1079529	1081258	Pf3D7_05_v3	PF3D7_0526100	conserved Plasmodium membrane protein, unknown function	-0.018686	-0.061177	-0.132631	0.009388	-0.069932
Pf3D7_05_v3	1081308	1084066	Pf3D7_05_v3	PF3D7_0526200	ADP-ribosylation factor GTPase-activating protein, putative	-0.025025	-0.066797	-0.039312	-0.033483	-0.091939
Pf3D7_05_v3	1085373	1086844	Pf3D7_05_v3	PF3D7_0526300	WD repeat-containing protein 55, putative	0.032412	-0.002638	-0.042936	-0.074491	0.010207
Pf3D7_05_v3	1088173	1089758	Pf3D7_05_v3	PF3D7_0526400	conserved Plasmodium protein, unknown function	0.110682	-0.048612	-0.030306	0.092306	-0.009149
Pf3D7_05_v3	1090680	1095334	Pf3D7_05_v3	PF3D7_0526500	conserved Plasmodium protein, unknown function	0.015343	-0.03472	-0.055211	0.119828	0.038891
Pf3D7_05_v3	1100953	1115027	Pf3D7_05_v3	PF3D7_0526600	conserved Plasmodium protein, unknown function	-0.031498	-0.015272	-0.016985	-0.05264	-0.021051
Pf3D7_05_v3	1117011	1119901	Pf3D7_05_v3	PF3D7_0526700	conserved protein, unknown function	0.024549	0.011677	0.042896	0.205342	0.119239
Pf3D7_05_v3	1120454	1122060	Pf3D7_05_v3	PF3D7_0526800	conserved Plasmodium protein, unknown function	-0.067365	-0.095827	-0.135935	0.111973	-0.011357
Pf3D7_05_v3	1123360	1124845	Pf3D7_05_v3	PF3D7_0526900	transmembrane emp24 domain-containing protein, putative	-0.111884	0.044237	-0.042368	-0.339056	-0.162611
Pf3D7_05_v3	1124849	1128396	Pf3D7_05_v3	PF3D7_0527000	DNA replication licensing factor MCM3, putative	0.0107	0.037965	-0.014124	-0.361716	-0.131155
Pf3D7_05_v3	1129709	1131004	Pf3D7_05_v3	PF3D7_0527100	ubiquitin-conjugating enzyme E2 N, putative	-0.040796	-0.035045	-0.036296	-0.009595	-0.021095
Pf3D7_05_v3	1132687	1135104	Pf3D7_05_v3	PF3D7_0527200	ubiquitin carboxyl-terminal hydrolase 14	0.06488	0.096461	0.075907	0.136644	0.073996
Pf3D7_05_v3	1135726	1138120	Pf3D7_05_v3	PF3D7_0527300	methionine aminopeptidase 1a, putative	-0.028507	-0.029798	-0.064043	0.043511	0.062774
Pf3D7_05_v3	1140377	1141404	Pf3D7_05_v3	PF3D7_0527400	conserved Plasmodium protein, unknown function	-0.150343	-0.121774	-0.09936	-0.026663	-0.002899
Pf3D7_05_v3	1143368	1145608	Pf3D7_05_v3	PF3D7_0527500	Hsc70-interacting protein	-0.316298	-0.217151	-0.161279	0.104592	-0.058205
Pf3D7_05_v3	1145609	1149060	Pf3D7_05_v3	PF3D7_0527600	conserved Plasmodium protein, unknown function	0.187798	0.090084	0.037471	-0.154457	-0.004833
Pf3D7_05_v3	1153426	1155923	Pf3D7_05_v3	PF3D7_0527900	ATP-dependent RNA helicase DDX41, putative	0.045277	-0.051922	-0.036776	0.14954	0.087452
Pf3D7_05_v3	1157590	1161803	Pf3D7_05_v3	PF3D7_0528100	AP-1 complex subunit beta, putative	-0.007556	-0.107382	-0.097938	0.052643	0.001834
Pf3D7_05_v3	1163158	1165322	Pf3D7_05_v3	PF3D7_0528200	eukaryotic translation initiation factor 3 subunit E, putative	0.042001	-0.034527	0.00358	0.000289	-0.010509
Pf3D7_05_v3	1166270	1168260	Pf3D7_05_v3	PF3D7_0528300	conserved protein, unknown function	-0.081427	-0.076705	-0.096206	-0.173591	-0.204261
Pf3D7_05_v3	1171409	1174140	Pf3D7_05_v3	PF3D7_0528400	palmitoyltransferase DHHC7	-0.033843	-0.074425	-0.105309	0.049714	0.019805
Pf3D7_05_v3	1174657	1177536	Pf3D7_05_v3	PF3D7_0528500	F-actin-capping protein subunit alpha, putative	0.067847	0.035726	0.020934	0.257514	0.094515
Pf3D7_05_v3	1178026	1179140	Pf3D7_05_v3	PF3D7_0528700	peptidyl-prolyl cis-trans isomerase	-0.003632	0.042127	-0.045556	-0.038176	-0.02212
Pf3D7_05_v3	1180175	1182288	Pf3D7_05_v3	PF3D7_0528800	nucleolar preribosomal GTPase, putative	-0.116694	-0.073114	-0.010426	-0.144793	-0.070307
Pf3D7_05_v3	1183666	1185889	Pf3D7_05_v3	PF3D7_0528900	conserved protein, unknown function	0.043289	-0.043714	0.014182	-0.020965	-0.00932
Pf3D7_05_v3	1186537	1189196	Pf3D7_05_v3	PF3D7_0529000	conserved Plasmodium protein, unknown function	0.038128	0.096206	0.083594	0.133677	0.081278
Pf3D7_05_v3	1190750	1191932	Pf3D7_05_v3	PF3D7_0529100	thioredoxin-like protein, putative	0.117519	0.042236	0.052718	0.162413	0.108783
Pf3D7_05_v3	1192723	1195582	Pf3D7_05_v3	PF3D7_0529200	sugar transporter, putative	0.072562	-0.037197	0.03772	0.461051	0.188098
Pf3D7_05_v3	1196065	1197639	Pf3D7_05_v3	PF3D7_0529300	apicoplast TIC22 protein	-0.104006	0.006804	0.011424	0.063513	0.078086
Pf3D7_05_v3	1198915	1205437	Pf3D7_05_v3	PF3D7_0529400	conserved Plasmodium protein, unknown function	-0.078367	-0.001157	-0.024582	-0.183104	-0.115837
Pf3D7_05_v3	1206223	1207929	Pf3D7_05_v3	PF3D7_0529500	cell cycle regulator protein, putative	-0.057588	-0.025643	-0.040743	0.173456	0.055772
Pf3D7_05_v3	1208756	1212352	Pf3D7_05_v3	PF3D7_0529700	heptatricopeptide repeat-containing protein, putative	-0.064008	-0.056646	0.009782	0.021061	0.070309
Pf3D7_05_v3	1213283	1219626	Pf3D7_05_v3	PF3D7_0529800	conserved Plasmodium protein, unknown function	-0.034974	-0.076338	-0.03446	0.31378	0.143796
Pf3D7_05_v3	1220527	1222242	Pf3D7_05_v3	PF3D7_0529900	RING zinc finger protein, putative	-0.058818	-0.010368	-0.015709	0.050095	0.074389
Pf3D7_05_v3	1224348	1225141	Pf3D7_05_v3	PF3D7_0530000	conserved Plasmodium protein, unknown function	-0.056025	0.022339	0.03537	0.201921	0.182648
Pf3D7_05_v3	1226633	1228007	Pf3D7_05_v3	PF3D7_0530100	SNARE protein, putative	-0.171627	-0.157193	-0.128915	0.072359	-0.078974
Pf3D7_05_v3	1228827	1230901	Pf3D7_05_v3	PF3D7_0530200	phosphoenolpyruvate/phosphate translocator	-0.035645	0.041365	-0.025592	0.123472	0.057118
Pf3D7_05_v3	1233151	1238336	Pf3D7_05_v3	PF3D7_0530300	conserved Plasmodium membrane protein, unknown function	-0.179679	-0.048867	-0.039948	0.058117	0.035786
Pf3D7_05_v3	1238383	1244237	Pf3D7_05_v3	PF3D7_0530400	conserved Plasmodium protein, unknown function	-0.150227	-0.104109	-0.072454	0.160918	0.057629
Pf3D7_05_v3	1244501	1248363	Pf3D7_05_v3	PF3D7_0530500	conserved Plasmodium membrane protein, unknown function	-0.070069	-0.0265	0.036175	0.29959	0.09823
Pf3D7_05_v3	1248364	1250211	Pf3D7_05_v3	PF3D7_0530600	XAP-5 DNA binding protein, putative	0.049674	0.058988	0.034238	0.114326	0.107761
Pf3D7_05_v3	1250487	1254440	Pf3D7_05_v3	PF3D7_0530700	conserved Plasmodium protein, unknown function	-0.04213	0.029276	0.042588	0.269964	0.182181
Pf3D7_05_v3	1254971	1257488	Pf3D7_05_v3	PF3D7_0530800	CPW-WPC family protein	-0.063108	0.172215	0.076034	0.281089	0.163213
Pf3D7_05_v3	1257489	1266000	Pf3D7_05_v3	PF3D7_0530900	formin 1	-0.116418	0.047851	0.050222	0.225903	0.154065
Pf3D7_05_v3	1267160	1269789	Pf3D7_05_v3	PF3D7_0531000	SURF1 domain-containing protein, putative	-0.103895	0.032197	0.073535	0.169982	0.081712
Pf3D7_05_v3	1270138	1278734	Pf3D7_05_v3	PF3D7_0531100	conserved Plasmodium protein, unknown function	-0.20196	-0.019696	-0.038796	0.154794	0.079542
Pf3D7_05_v3	1279708	1280849	Pf3D7_05_v3	PF3D7_0531200	ribosomal protein S16, mitochondrial, putative	-0.039985	0.097871	0.026791	0.186564	0.057502
Pf3D7_05_v3	1281039	1282422	Pf3D7_05_v3	PF3D7_0531300	conserved Plasmodium protein, unknown function	-0.106843	-0.032073	-0.044432	0.154151	0.056297
Pf3D7_05_v3	1282423	1286356	Pf3D7_05_v3	PF3D7_0531400	conserved Plasmodium protein, unknown function	-0.092471	-0.018846	-0.049693	0.257254	0.132017
Pf3D7_05_v3	1289455	1291692	Pf3D7_05_v3	PF3D7_0531600	18S ribosomal RNA	-0.452639	-0.121472	-0.122356	-0.181589	-0.190262
Pf3D7_05_v3	1292410	1296449	Pf3D7_05_v3	PF3D7_0532000	28S ribosomal RNA	-0.329521	-0.044115	-0.174085	-1.10378	-0.584373
Pf3D7_05_v3	1300974	1302019	Pf3D7_05_v3	PF3D7_0532100	early transcribed membrane protein 5	-0.139253	0.010796	-0.023983	-0.150566	-0.201521
Pf3D7_05_v3	1303412	1304776	Pf3D7_05_v3	PF3D7_0532200	Plasmodium exported protein (PHISTc), unknown function	-0.178453	-0.060927	-0.074805	0.112342	-0.0499
Pf3D7_05_v3	1308028	1310190	Pf3D7_05_v3	PF3D7_0532300	Plasmodium exported protein (PHISTb), unknown function	-0.127956	-0.018355	-0.066361	0.101148	-0.011607
Pf3D7_05_v3	1312221	1314404	Pf3D7_05_v3	PF3D7_0532400	lysine-rich membrane-associated PHISTb protein	-0.07151	0.033518	-0.035834	0.1792	0.091742
Pf3D7_05_v3	1318281	1319479	Pf3D7_05_v3	PF3D7_0532600	Plasmodium exported protein, unknown function	-0.134608	-0.033363	-0.221757	-0.109183	-0.031949
Pf3D7_05_v3	1322150	1323499	Pf3D7_05_v3	PF3D7_0532700	erythrocyte membrane protein 1 (PfEMP1), pseudogene	-0.185879	-0.064469	-0.120736	0.081462	-0.006794
Pf3D7_05_v3	1323989	1325277	Pf3D7_05_v3	PF3D7_0532800	stevor, pseudogene	-0.083247	-0.034545	-0.032399	0.083154	0.068567
Pf3D7_05_v3	1325995	1327679	Pf3D7_05_v3	PF3D7_0532900	rifin	-0.175177	-0.058865	-0.04268	0.122341	0.093646
Pf3D7_05_v3	1329305	1331058	Pf3D7_05_v3	PF3D7_0533000	rifin, pseudogene	-0.26765	-0.001948	0.018073	-0.237761	-0.08088
Pf3D7_05_v3	1333220	1343214	Pf3D7_05_v3	PF3D7_0533100	erythrocyte membrane protein 1 (PfEMP1), pseudogene	0.008569	0.133251	0.087675	0.370085	0.301347
Pf3D7_06_v3	403	1682	Pf3D7_06_v3	PF3D7_0600100	erythrocyte membrane protein 1 (PfEMP1), pseudogene	-0.023914	-0.059101	-0.030139	0.274278	0.07057
Pf3D7_06_v3	3253	13085	Pf3D7_06_v3	PF3D7_0600200	erythrocyte membrane protein 1, PfEMP1	-0.166668	-0.16922	-0.107193	0.078016	-0.049793
Pf3D7_06_v3	14815	16660	Pf3D7_06_v3	PF3D7_0600300	rifin	-0.065493	-0.076173	-0.066758	0.013323	-0.030568
Pf3D7_06_v3	18336	22971	Pf3D7_06_v3	PF3D7_0600400	erythrocyte membrane protein 1, PfEMP1	0.21785	-0.004749	-0.056546	5.33503	2.52696
Pf3D7_06_v3	29368	31724	Pf3D7_06_v3	PF3D7_0600600	erythrocyte membrane protein 1 (PfEMP1), exon 2	0.193302	-0.102823	-0.111169	5.32899	2.50841
Pf3D7_06_v3	31725	33494	Pf3D7_06_v3	PF3D7_0600700	rifin	-0.162979	0.709072	0.681297	-0.037228	-0.146635
Pf3D7_06_v3	35105	36845	Pf3D7_06_v3	PF3D7_0600800	rifin, pseudogene	-0.059575	0.877124	0.855321	0.198133	0.180834
Pf3D7_06_v3	70698	72185	Pf3D7_06_v3	PF3D7_0601700	Plasmodium exported protein (PHISTa), unknown function, pseudogene	0.048911	0.862393	0.865348	0.063586	0.036042
Pf3D7_06_v3	77940	79034	Pf3D7_06_v3	PF3D7_0601900	conserved Plasmodium protein, unknown function	-0.061987	0.880818	0.844499	0.101853	0.050532
Pf3D7_06_v3	82359	87172	Pf3D7_06_v3	PF3D7_0602000	zinc finger protein, putative	-0.016206	0.83793	0.815006	0.338724	0.167195
Pf3D7_06_v3	92256	96918	Pf3D7_06_v3	PF3D7_0602100	ATP-dependent RNA helicase, putative	-0.060888	0.754595	0.765149	-0.157235	-0.095646
Pf3D7_06_v3	97640	99201	Pf3D7_06_v3	PF3D7_0602200	MYND-type zinc finger protein, putative	-0.244911	0.741188	0.711494	-0.177139	-0.137484
Pf3D7_06_v3	99531	100975	Pf3D7_06_v3	PF3D7_0602300	liver merozoite formation protein, putative	0.020832	0.862798	0.812577	0.133387	0.134241
Pf3D7_06_v3	101135	104811	Pf3D7_06_v3	PF3D7_0602400	elongation factor G	-0.010258	0.941813	0.866014	0.010057	0.025529
Pf3D7_06_v3	105253	106839	Pf3D7_06_v3	PF3D7_0602500	geranylgeranyl transferase type-2 subunit beta, putative	-0.050617	0.845323	0.814412	0.131933	0.021357
Pf3D7_06_v3	106840	111914	Pf3D7_06_v3	PF3D7_0602600	SAC3 domain-containing protein, putative	-0.113268	0.871895	0.781276	0.227694	0.092523
Pf3D7_06_v3	113574	115474	Pf3D7_06_v3	PF3D7_0602700	conserved Plasmodium protein, unknown function	-0.101252	0.920877	0.817772	0.154836	-0.01475
Pf3D7_06_v3	115834	118274	Pf3D7_06_v3	PF3D7_0602800	JmjC domain-containing protein, putative	-0.238262	0.805973	0.729874	-0.056793	-0.067875
Pf3D7_06_v3	118388	120453	Pf3D7_06_v3	PF3D7_0602900	conserved Plasmodium protein, unknown function	-0.229759	0.834267	0.840384	0.076251	-0.017527
Pf3D7_06_v3	122384	124662	Pf3D7_06_v3	PF3D7_0603000	conserved Plasmodium protein, unknown function	-0.230151	0.795347	0.747246	0.22624	0.043015
Pf3D7_06_v3	125208	127066	Pf3D7_06_v3	PF3D7_0603100	RNA-binding protein, putative	-0.006166	0.814	0.800486	0.256127	0.107584
Pf3D7_06_v3	128371	130182	Pf3D7_06_v3	PF3D7_0603200	mitochondrial chaperone BCS1, putative	-0.007518	0.833117	0.782883	0.031229	0.032235
Pf3D7_06_v3	130183	132288	Pf3D7_06_v3	PF3D7_0603300	dihydroorotate dehydrogenase	0.036846	0.837109	0.803009	0.227013	0.122495
Pf3D7_06_v3	132900	136711	Pf3D7_06_v3	PF3D7_0603400	trophozoite exported protein 1	-0.015815	0.824668	0.791768	0.289381	0.212212
Pf3D7_06_v3	138943	140768	Pf3D7_06_v3	PF3D7_0603500	cation/H+ antiporter	0.00994	0.842083	0.797986	0.257535	0.117301
Pf3D7_06_v3	141168	149193	Pf3D7_06_v3	PF3D7_0603600	conserved Plasmodium protein, unknown function	0.112278	0.979068	0.985945	0.266158	0.155405
Pf3D7_06_v3	150805	152463	Pf3D7_06_v3	PF3D7_0603700	phenylalanine--tRNA ligase	0.035803	0.94152	0.880386	0.166331	0.150777
Pf3D7_06_v3	152464	160705	Pf3D7_06_v3	PF3D7_0603800	centrosomal protein CEP76, putative	0.00613	0.801453	0.857144	-0.058742	-0.030484
Pf3D7_06_v3	161004	162631	Pf3D7_06_v3	PF3D7_0603900	conserved Plasmodium protein, unknown function	-0.021645	-0.009667	0.008418	0.134352	0.043067
Pf3D7_06_v3	163578	170110	Pf3D7_06_v3	PF3D7_0604000	conserved Plasmodium protein, unknown function	-0.04381	-0.004435	0.016636	0.188457	0.074591
Pf3D7_06_v3	171051	177490	Pf3D7_06_v3	PF3D7_0604100	AP2 domain transcription factor	-0.023871	0.018708	-0.0023	0.150777	0.015494
Pf3D7_06_v3	180686	181731	Pf3D7_06_v3	PF3D7_0604200	mitochondrial ribosomal protein L41, putative	-0.01324	-0.055991	-0.068891	-0.01209	0.029231
Pf3D7_06_v3	181966	184714	Pf3D7_06_v3	PF3D7_0604300	conserved Plasmodium protein, unknown function	-0.127219	-0.038333	-0.069225	0.051728	-0.011863
Pf3D7_06_v3	184715	186093	Pf3D7_06_v3	PF3D7_0604400	conserved protein, unknown function	-0.005157	0.054602	0.048547	0.048336	0.045735
Pf3D7_06_v3	188762	198328	Pf3D7_06_v3	PF3D7_0604500	conserved Plasmodium protein, unknown function	0.032324	0.098811	0.105607	0.043602	0.01394
Pf3D7_06_v3	198612	204497	Pf3D7_06_v3	PF3D7_0604600	DNA helicase, putative	-0.05988	-0.031967	-0.043765	0.04652	-0.013977
Pf3D7_06_v3	204498	206457	Pf3D7_06_v3	PF3D7_0604700	glyoxalase I-like protein GILP	-0.014257	0.049672	0.049954	0.269689	0.212655
Pf3D7_06_v3	206605	211409	Pf3D7_06_v3	PF3D7_0604800	RAP protein, putative	-0.028092	-0.024563	0.074477	0.056578	0.080759
Pf3D7_06_v3	212165	213282	Pf3D7_06_v3	PF3D7_0604900	conserved Plasmodium protein, unknown function	-0.032496	-0.05254	-0.038157	0.258305	0.086731
Pf3D7_06_v3	213308	214392	Pf3D7_06_v3	PF3D7_0605000	50S ribosomal protein L24, putative	0.102209	0.100207	0.060147	0.227711	0.170761
Pf3D7_06_v3	216990	219757	Pf3D7_06_v3	PF3D7_0605100	RNA-binding protein, putative	0.195146	0.106081	0.093251	0.249772	0.166114
Pf3D7_06_v3	220157	222063	Pf3D7_06_v3	PF3D7_0605200	conserved protein, unknown function	-0.033671	0.077176	0.065612	0.021162	-0.024132
Pf3D7_06_v3	222489	224450	Pf3D7_06_v3	PF3D7_0605300	serine/threonine protein kinase	-0.049854	0.045369	0.046016	0.115478	0.07515
Pf3D7_06_v3	225221	227696	Pf3D7_06_v3	PF3D7_0605500	cyclin dependent kinase binding protein, putative	-0.092131	-0.012041	0.000106	0.219243	0.083539
Pf3D7_06_v3	227882	235085	Pf3D7_06_v3	PF3D7_0605600	nucleoside diphosphate kinase, putative	-0.02927	0.007892	0.023076	0.151278	0.082006
Pf3D7_06_v3	236147	237501	Pf3D7_06_v3	PF3D7_0605700	conserved Plasmodium protein, unknown function	-0.045828	0.079211	0.114711	-0.143624	-0.065504
Pf3D7_06_v3	237561	244771	Pf3D7_06_v3	PF3D7_0605800	DNA repair protein RAD50, putative	-0.029216	-0.08422	0.013751	0.301851	0.111659
Pf3D7_06_v3	247390	249416	Pf3D7_06_v3	PF3D7_0605900	long chain polyunsaturated fatty acid elongation enzyme, putative	-0.027871	0.029357	-0.020239	0.067349	-0.031681
Pf3D7_06_v3	250362	254053	Pf3D7_06_v3	PF3D7_0606000	conserved Plasmodium protein, unknown function	-0.119666	-0.043089	-0.04146	0.070921	-0.00803
Pf3D7_06_v3	257354	260224	Pf3D7_06_v3	PF3D7_0606100	RNA-binding protein, putative	-0.07575	-0.009187	0.031183	0.055096	-0.001746
Pf3D7_06_v3	260781	262195	Pf3D7_06_v3	PF3D7_0606200	ubiquitin-conjugating enzyme E2 PEX4, putative	-0.032065	-0.046435	-0.013598	0.063608	0.03735
Pf3D7_06_v3	265589	268649	Pf3D7_06_v3	PF3D7_0606500	polypyrimidine tract-binding protein, putative	0.076571	0.041892	0.004284	0.15297	0.091238
Pf3D7_06_v3	270082	278012	Pf3D7_06_v3	PF3D7_0606600	conserved Plasmodium protein, unknown function	0.119058	0.02573	0.132969	0.199866	0.168156
Pf3D7_06_v3	281799	287267	Pf3D7_06_v3	PF3D7_0606700	coatomer alpha subunit, putative	0.052895	-0.002444	0.043975	0.058069	-0.008431
Pf3D7_06_v3	288127	289526	Pf3D7_06_v3	PF3D7_0606800	VFT protein	0.092216	0.015207	0.051168	0.30728	0.180791
Pf3D7_06_v3	290176	291335	Pf3D7_06_v3	PF3D7_0606900	glutaredoxin-like protein	0.038681	0.062387	0.098736	0.1408	0.113425
Pf3D7_06_v3	293614	297047	Pf3D7_06_v3	PF3D7_0607000	translation initiation factor IF-2, putative	-0.098929	-0.059343	-0.008561	0.06139	-0.039336
Pf3D7_06_v3	297691	301447	Pf3D7_06_v3	PF3D7_0607100	MYND-type zinc finger protein, putative	0.024405	0.012013	0.093283	0.079703	0.050666
Pf3D7_06_v3	301624	303540	Pf3D7_06_v3	PF3D7_0607200	RING zinc finger protein, putative	-0.077052	-0.025075	-0.049599	0.040746	0.012177
Pf3D7_06_v3	304388	306213	Pf3D7_06_v3	PF3D7_0607300	uroporphyrinogen III decarboxylase	-0.107432	-0.020461	-0.049814	0.011042	-0.011758
Pf3D7_06_v3	306214	310211	Pf3D7_06_v3	PF3D7_0607400	G-protein associated signal transduction protein, putative	0.026079	-0.016573	0.008823	0.041926	0.010345
Pf3D7_06_v3	311300	313365	Pf3D7_06_v3	PF3D7_0607500	4-hydroxybenzoate polyprenyltransferase, putative	-0.015033	-0.030059	-0.02029	0.07554	0.013684
Pf3D7_06_v3	313606	317132	Pf3D7_06_v3	PF3D7_0607600	spindle assembly abnormal protein 6, putative	-0.077884	0.003658	0.024384	0.123584	-0.006293
Pf3D7_06_v3	320490	329248	Pf3D7_06_v3	PF3D7_0607700	conserved Plasmodium protein, unknown function	0.101389	-0.012356	0.026066	0.20823	0.08849
Pf3D7_06_v3	329287	331975	Pf3D7_06_v3	PF3D7_0607800	GTP-binding protein, putative	0.04041	0.172104	0.183593	0.208004	0.191414
Pf3D7_06_v3	332093	335020	Pf3D7_06_v3	PF3D7_0607900	conserved Plasmodium protein, unknown function	0.042954	0.000386	0.027824	0.12993	0.035586
Pf3D7_06_v3	335021	337580	Pf3D7_06_v3	PF3D7_0608000	diphthine methyltransferase, putative	-0.110053	-0.010014	0.080149	0.005126	0.044996
Pf3D7_06_v3	337581	341817	Pf3D7_06_v3	PF3D7_0608100	conserved Plasmodium protein, unknown function	0.004122	0.027063	0.057518	0.098209	0.037785
Pf3D7_06_v3	341818	343016	Pf3D7_06_v3	PF3D7_0608200	conserved Plasmodium protein, unknown function	-0.117326	-0.040123	-0.031968	-0.094319	-0.061416
Pf3D7_06_v3	343017	347757	Pf3D7_06_v3	PF3D7_0608300	heptatricopeptide repeat-containing protein, putative	0.02893	-0.048317	-0.003012	-0.070711	-0.007935
Pf3D7_06_v3	347760	349621	Pf3D7_06_v3	PF3D7_0608310	sorting assembly machinery 50 kDa subunit, putative	-0.005128	0.031147	0.030061	-0.040098	-0.019917
Pf3D7_06_v3	349696	350765	Pf3D7_06_v3	PF3D7_0608400	conserved Plasmodium protein, unknown function	-0.033278	-0.113032	-0.037801	-0.253186	-0.139458
Pf3D7_06_v3	351530	353025	Pf3D7_06_v3	PF3D7_0608500	proteasome subunit alpha type-2, putative	-0.043311	-0.023848	-0.020611	0.160326	0.085988
Pf3D7_06_v3	354979	356526	Pf3D7_06_v3	PF3D7_0608600	conserved Plasmodium protein, unknown function	-0.060082	-0.03386	0.011577	-0.029511	-0.075941
Pf3D7_06_v3	358141	360453	Pf3D7_06_v3	PF3D7_0608700	T-complex protein 1 subunit zeta	-0.115343	-0.031758	0.052658	0.050696	-0.030648
Pf3D7_06_v3	362385	364129	Pf3D7_06_v3	PF3D7_0608800	ornithine aminotransferase	-0.038199	-0.009458	0.016996	0.026841	0.013201
Pf3D7_06_v3	365037	368709	Pf3D7_06_v3	PF3D7_0608900	conserved Plasmodium protein, unknown function	0.006035	0.055585	0.027459	0.057587	0.045485
Pf3D7_06_v3	370011	388704	Pf3D7_06_v3	PF3D7_0609000	nucleoporin NUP637, putative	0.00635	-0.064472	0.019656	-0.067207	-0.081253
Pf3D7_06_v3	388705	390998	Pf3D7_06_v3	PF3D7_0609100	zinc transporter ZIP1, putative	0.053996	0.084226	0.067214	-0.019502	0.017427
Pf3D7_06_v3	392741	394861	Pf3D7_06_v3	PF3D7_0609200	citrate synthase-like protein, putative	0.02266	0.065015	0.04401	-0.136713	0.039682
Pf3D7_06_v3	395992	399539	Pf3D7_06_v3	PF3D7_0609300	conserved Plasmodium protein, unknown function	0.092356	0.032136	0.035338	0.02624	0.049191
Pf3D7_06_v3	399563	401874	Pf3D7_06_v3	PF3D7_0609400	mitochondrial cardiolipin synthase, putative	-0.010151	0.028241	0.050461	0.054266	0.113129
Pf3D7_06_v3	402472	407492	Pf3D7_06_v3	PF3D7_0609500	conserved Plasmodium protein, unknown function	-0.023635	0.010897	0.03298	0.051057	0.021053
Pf3D7_06_v3	407791	412252	Pf3D7_06_v3	PF3D7_0609600	conserved Plasmodium protein, unknown function	-0.020371	0.062899	0.046861	0.069919	0.023724
Pf3D7_06_v3	413402	420031	Pf3D7_06_v3	PF3D7_0609700	conserved Plasmodium protein, unknown function	-0.036062	-0.004932	-0.040772	0.052662	-0.016279
Pf3D7_06_v3	420907	422872	Pf3D7_06_v3	PF3D7_0609800	palmitoyltransferase DHHC2, putative	0.004793	-0.023405	-0.001234	0.175668	0.178657
Pf3D7_06_v3	425555	432108	Pf3D7_06_v3	PF3D7_0609900	conserved Plasmodium protein, unknown function	-0.024881	-0.005639	0.018957	0.051335	0.065773
Pf3D7_06_v3	432758	434428	Pf3D7_06_v3	PF3D7_0610000	mitochondrial ribosomal protein L19 precursor, putative	-0.006078	0.022912	-0.021466	0.089245	-0.009558
Pf3D7_06_v3	434557	436715	Pf3D7_06_v3	PF3D7_0610100	pre-mRNA-splicing factor SLU7, putative	-0.07348	-0.109251	-0.035604	-0.170594	-0.190345
Pf3D7_06_v3	437413	440795	Pf3D7_06_v3	PF3D7_0610200	RNA-binding protein 25, putative	-0.170766	-0.138651	-0.039879	-0.223965	-0.191958
Pf3D7_06_v3	444497	445407	Pf3D7_06_v3	PF3D7_0610400	histone H3	0.012032	0.105322	0.023019	0.047008	0.009468
Pf3D7_06_v3	445511	446613	Pf3D7_06_v3	PF3D7_0610500	peptidyl-tRNA hydrolase PTRHD1, putative	0.027139	0.038189	0.093229	0.086527	0.086031
Pf3D7_06_v3	449041	451711	Pf3D7_06_v3	PF3D7_0610600	calcium-dependent protein kinase 2	0.011699	0.04796	0.045551	0.07075	0.058229
Pf3D7_06_v3	453559	455939	Pf3D7_06_v3	PF3D7_0610800	transketolase	0.04715	-0.00692	0.040782	0.250062	-0.009646
Pf3D7_06_v3	456497	460839	Pf3D7_06_v3	PF3D7_0610900	transcription elongation factor SPT5, putative	-0.021656	0.014908	-0.034529	0.100942	0.036876
Pf3D7_06_v3	463314	464926	Pf3D7_06_v3	PF3D7_0611000	SNARE associated Golgi protein, putative	0.085049	0.057963	0.053441	0.058912	0.079788
Pf3D7_06_v3	465948	466699	Pf3D7_06_v3	PF3D7_0611100	succinate dehydrogenase subunit 3, putative	0.068573	0.038619	-0.028116	0.040876	-0.018047
Pf3D7_06_v3	467231	468892	Pf3D7_06_v3	PF3D7_0611200	AP2 domain transcription factor, putative	-0.054141	-0.050778	0.022137	0.001094	-0.032153
Pf3D7_06_v3	469799	471441	Pf3D7_06_v3	PF3D7_0611300	ATP synthase-associated protein, putative	-0.065324	-0.004127	-0.025205	-0.111046	-0.019755
Pf3D7_06_v3	471442	474400	Pf3D7_06_v3	PF3D7_0611400	SWIB/MDM2 domain-containing protein	-0.005465	-0.061015	-0.045011	0.007547	-0.038806
Pf3D7_06_v3	482575	484157	Pf3D7_06_v3	PF3D7_0611500	conserved protein, unknown function	0.170112	0.011704	0.058771	0.233714	0.215836
Pf3D7_06_v3	484864	487316	Pf3D7_06_v3	PF3D7_0611600	basal complex transmembrane protein 1	0.106026	0.115421	0.099037	0.035059	0.004556
Pf3D7_06_v3	490608	501390	Pf3D7_06_v3	PF3D7_0611800	conserved Plasmodium protein, unknown function	0.015227	0.00608	-0.002087	0.03125	0.073857
Pf3D7_06_v3	506130	507438	Pf3D7_06_v3	PF3D7_0611900	lsm12, putative	0.015798	0.010529	0.012391	0.135687	0.083113
Pf3D7_06_v3	507439	508536	Pf3D7_06_v3	PF3D7_0612000	conserved Plasmodium protein, unknown function	-0.002195	0.003497	0.048237	0.083725	0.032795
Pf3D7_06_v3	508910	511380	Pf3D7_06_v3	PF3D7_0612100	eukaryotic translation initiation factor 3 subunit L, putative	0.027455	-0.012555	0.004241	-0.005879	0.02606
Pf3D7_06_v3	512722	519798	Pf3D7_06_v3	PF3D7_0612200	leucine-rich repeat protein	0.119201	0.111367	0.145877	0.065265	0.020545
Pf3D7_06_v3	521168	522119	Pf3D7_06_v3	PF3D7_0612400	conserved Plasmodium protein, unknown function	0.049074	0.124	0.13006	0.036081	0.09688
Pf3D7_06_v3	523407	525355	Pf3D7_06_v3	PF3D7_0612600	cytoplasmic tRNA 2-thiolation protein 1, putative	0.11411	-0.003165	0.019706	0.022185	-0.016662
Pf3D7_06_v3	525737	527280	Pf3D7_06_v3	PF3D7_0612700	6-cysteine protein P12	-0.007845	-0.03761	0.036807	-0.111915	-0.075701
Pf3D7_06_v3	527810	529425	Pf3D7_06_v3	PF3D7_0612800	6-cysteine protein	-0.111173	0.026936	0.031001	-0.285742	-0.16513
Pf3D7_06_v3	530876	533436	Pf3D7_06_v3	PF3D7_0612900	nucleolar GTP-binding protein 1, putative	0.012824	-0.123645	-0.005356	-0.009005	-0.057047
Pf3D7_06_v3	533657	535614	Pf3D7_06_v3	PF3D7_0613000	conserved Plasmodium protein, unknown function	0.078313	-0.007643	0.033586	-0.008081	0.02153
Pf3D7_06_v3	537528	538835	Pf3D7_06_v3	PF3D7_0613100	conserved Plasmodium protein, unknown function	0.100238	0.13315	0.138967	-0.037413	0.122391
Pf3D7_06_v3	539054	539875	Pf3D7_06_v3	PF3D7_0613200	conserved Plasmodium protein, unknown function	-0.029583	0.041636	0.093046	-0.067521	-0.047943
Pf3D7_06_v3	539876	545048	Pf3D7_06_v3	PF3D7_0613300	rhoptry protein ROP14	-0.046867	0.012805	0.041562	-0.000388	0.017363
Pf3D7_06_v3	546714	547991	Pf3D7_06_v3	PF3D7_0613400	50S ribosomal protein L18, apicoplast, putative	-0.023437	0.063704	0.097554	0.071343	0.103858
Pf3D7_06_v3	548030	552621	Pf3D7_06_v3	PF3D7_0613500	AP-3 complex subunit beta, putative	-0.011448	0.011326	0.009162	0.063541	0.067978
Pf3D7_06_v3	554207	558478	Pf3D7_06_v3	PF3D7_0613600	conserved Plasmodium protein, unknown function	0.079461	0.071618	0.080874	0.291494	0.208779
Pf3D7_06_v3	559099	561710	Pf3D7_06_v3	PF3D7_0613700	syntaxin-binding protein, putative	-0.051648	0.040303	0.026603	0.180411	0.068189
Pf3D7_06_v3	565889	579214	Pf3D7_06_v3	PF3D7_0613800	AP2 domain transcription factor, putative	-0.139495	-0.051553	-0.041666	0.303581	0.086702
Pf3D7_06_v3	579215	586146	Pf3D7_06_v3	PF3D7_0613900	myosin E, putative	-0.080689	-0.017419	-0.038728	0.029253	-0.068735
Pf3D7_06_v3	586769	588885	Pf3D7_06_v3	PF3D7_0614000	thiamine-phosphate synthase, putative	-0.015035	0.030886	0.054725	0.139972	0.075293
Pf3D7_06_v3	589207	592514	Pf3D7_06_v3	PF3D7_0614100	conserved Plasmodium protein, unknown function	-0.239898	0.002761	-0.117019	-0.014801	-0.055759
Pf3D7_06_v3	592922	596154	Pf3D7_06_v3	PF3D7_0614200	cytosolic Fe-S cluster assembly factor NAR1, putative	-0.120015	-0.010002	0.038152	-0.028391	-0.00033
Pf3D7_06_v3	597234	600767	Pf3D7_06_v3	PF3D7_0614300	major facilitator superfamily-related transporter, putative	-0.176505	-0.042919	-0.101409	-0.202686	-0.114213
Pf3D7_06_v3	604323	605590	Pf3D7_06_v3	PF3D7_0614400	pre-mRNA-splicing factor CWF7, putative	-0.091168	-0.017369	0.011302	0.038681	0.023764
Pf3D7_06_v3	605892	607509	Pf3D7_06_v3	PF3D7_0614500	60S ribosomal protein L19	-0.06498	0.023857	0.020344	-0.07871	-0.032071
Pf3D7_06_v3	609008	611352	Pf3D7_06_v3	PF3D7_0614600	conserved Plasmodium protein, unknown function	-0.040448	-0.012528	0.01073	0.086237	0.034894
Pf3D7_06_v3	612221	614648	Pf3D7_06_v3	PF3D7_0614700	conserved Plasmodium protein, unknown function	0.028431	0.05185	0.073639	0.131187	0.147964
Pf3D7_06_v3	615047	616860	Pf3D7_06_v3	PF3D7_0614800	endonuclease III-like protein 1, putative	0.078261	-0.054557	-0.033409	0.021386	0.00382
Pf3D7_06_v3	617512	621786	Pf3D7_06_v3	PF3D7_0614900	conserved Plasmodium membrane protein, unknown function	-0.058808	-0.007906	0.068734	-0.016315	-0.04378
Pf3D7_06_v3	622868	624571	Pf3D7_06_v3	PF3D7_0615100	enoyl-acyl carrier reductase	0.0694	-0.006463	0.039677	0.148123	0.043159
Pf3D7_06_v3	625115	627652	Pf3D7_06_v3	PF3D7_0615200	conserved protein, unknown function	-0.100097	-0.027431	0.001184	-0.050656	0.007035
Pf3D7_06_v3	627653	630567	Pf3D7_06_v3	PF3D7_0615300	GPI-anchored wall transfer protein 1, putative	0.024645	-0.028257	-0.021108	-0.009611	0.015709
Pf3D7_06_v3	630706	640424	Pf3D7_06_v3	PF3D7_0615400	ribonuclease, putative	0.121514	0.01392	0.002781	-0.066055	0.015373
Pf3D7_06_v3	643802	646403	Pf3D7_06_v3	PF3D7_0615500	cdc2-related protein kinase 5	0.045515	0.010778	-0.07659	-0.105627	-0.027126
Pf3D7_06_v3	646404	655846	Pf3D7_06_v3	PF3D7_0615600	zinc finger protein, putative	0.068487	0.009076	0.022471	0.108899	0.085667
Pf3D7_06_v3	656126	657787	Pf3D7_06_v3	PF3D7_0615700	RNA and export factor binding protein, putative	0.049116	0.006725	0.029104	-0.167936	-0.060406
Pf3D7_06_v3	657788	662039	Pf3D7_06_v3	PF3D7_0615800	conserved oligomeric Golgi complex subunit 4, putative	0.013693	-0.010199	-0.071906	0.098133	-0.155447
Pf3D7_06_v3	662185	668105	Pf3D7_06_v3	PF3D7_0615900	protein phosphatase, putative	0.10297	0.086494	0.111342	0.023827	0.03816
Pf3D7_06_v3	669610	671875	Pf3D7_06_v3	PF3D7_0616000	pyridoxal kinase	0.207326	-0.024887	-0.161119	-0.114508	0.061329
Pf3D7_06_v3	671876	673004	Pf3D7_06_v3	PF3D7_0616100	conserved Plasmodium protein, unknown function	-0.013768	-0.123125	-0.173355	-0.040249	-0.054306
Pf3D7_06_v3	673868	676625	Pf3D7_06_v3	PF3D7_0616200	kinetochore protein NDC80, putative	-0.068923	-0.049123	-0.021639	0.019365	0.005389
Pf3D7_06_v3	676638	677821	Pf3D7_06_v3	PF3D7_0616300	conserved Plasmodium protein, unknown function	0.03975	0.084605	0.045135	0.08742	0.054046
Pf3D7_06_v3	678137	683679	Pf3D7_06_v3	PF3D7_0616400	conserved Plasmodium protein, unknown function	-0.087226	-0.081395	-0.037216	-0.23671	-0.108637
Pf3D7_06_v3	684492	689055	Pf3D7_06_v3	PF3D7_0616500	TRAP-like protein	0.032769	-0.049223	-0.011224	0.065064	0.031179
Pf3D7_06_v3	689056	691381	Pf3D7_06_v3	PF3D7_0616600	conserved protein, unknown function	-0.048122	-0.069588	-0.085463	0.011341	-0.066179
Pf3D7_06_v3	691519	693569	Pf3D7_06_v3	PF3D7_0616700	ras GTPAse, putative	-0.001316	-0.018941	0.029041	-0.094116	-0.037151
Pf3D7_06_v3	695679	697744	Pf3D7_06_v3	PF3D7_0616800	malate:quinone oxidoreductase	0.005974	0.002972	0.031658	0.015341	0.068675
Pf3D7_06_v3	699002	703467	Pf3D7_06_v3	PF3D7_0616900	conserved Plasmodium protein, unknown function	0.084186	0.063992	0.015781	0.022216	-0.006639
Pf3D7_06_v3	703785	705418	Pf3D7_06_v3	PF3D7_0617000	mitochondrial import receptor subunit TOM40, putative	0.084353	0.147963	0.019607	0.010903	-0.012241
Pf3D7_06_v3	709809	714826	Pf3D7_06_v3	PF3D7_0617100	AP-2 complex subunit alpha, putative	0.136352	0.034985	0.051787	0.146252	0.158333
Pf3D7_06_v3	716800	719167	Pf3D7_06_v3	PF3D7_0617200	conserved protein, unknown function	-0.117428	-0.144809	-0.109315	-0.019147	-0.150231
Pf3D7_06_v3	720285	721562	Pf3D7_06_v3	PF3D7_0617300	conserved Plasmodium protein, unknown function	0.112481	-0.077912	-0.031608	0.158376	0.054295
Pf3D7_06_v3	722867	731740	Pf3D7_06_v3	PF3D7_0617400	erythrocyte membrane protein 1, PfEMP1	-0.007289	-0.088802	-0.126041	0.083313	0.00198
Pf3D7_06_v3	754145	755055	Pf3D7_06_v3	PF3D7_0617900	histone H3 variant	0.083369	-0.074216	0.019283	-0.107297	-0.059297
Pf3D7_06_v3	758359	761246	Pf3D7_06_v3	PF3D7_0618000	conserved Plasmodium membrane protein, unknown function	-0.002288	-0.082546	-0.108299	-0.157778	-0.099755
Pf3D7_06_v3	761689	764418	Pf3D7_06_v3	PF3D7_0618100	conserved Plasmodium protein, unknown function	0.033479	0.034075	0.038905	-0.136149	-0.078796
Pf3D7_06_v3	764419	765742	Pf3D7_06_v3	PF3D7_0618200	conserved protein, unknown function	-0.018586	-0.088785	0.045018	-0.024111	-0.006913
Pf3D7_06_v3	768542	769706	Pf3D7_06_v3	PF3D7_0618300	60S ribosomal protein L27a, putative	0.039539	0.094376	0.056891	-0.023154	0.019577
Pf3D7_06_v3	769897	772756	Pf3D7_06_v3	PF3D7_0618400	LMBR1 domain-containing protein, putative	-0.066825	-0.079559	-0.067211	-0.12186	-0.161299
Pf3D7_06_v3	774279	775720	Pf3D7_06_v3	PF3D7_0618500	malate dehydrogenase	0.033502	-0.003663	0.006989	-0.080792	-0.0127
Pf3D7_06_v3	775730	778085	Pf3D7_06_v3	PF3D7_0618600	rhomboid protease ROM10	-0.043938	-0.023731	-0.016459	-0.05574	0.032613
Pf3D7_06_v3	778442	779742	Pf3D7_06_v3	PF3D7_0618700	trafficking protein particle complex subunit 6A, putative	-0.035097	-0.073024	-0.001083	0.075098	-0.006192
Pf3D7_06_v3	779743	783546	Pf3D7_06_v3	PF3D7_0618800	heptatricopeptide repeat-containing protein, putative	0.04914	-0.07325	0.002215	-0.124484	-0.06078
Pf3D7_06_v3	784104	788277	Pf3D7_06_v3	PF3D7_0618900	phosphatidylinositol N-acetylglucosaminyltransferase subunit GPI1	-0.036701	-0.000445	0.011319	0.118905	-0.000303
Pf3D7_06_v3	788457	796275	Pf3D7_06_v3	PF3D7_0619000	conserved protein, unknown function	0.023155	0.016668	0.029807	0.052885	0.05082
Pf3D7_06_v3	796961	798768	Pf3D7_06_v3	PF3D7_0619100	conserved Plasmodium protein, unknown function	-0.019252	0.026416	-0.032043	-0.036333	-0.021576
Pf3D7_06_v3	799147	803039	Pf3D7_06_v3	PF3D7_0619200	conserved Plasmodium protein, unknown function	0.029001	0.011203	0.02183	0.056474	0.081827
Pf3D7_06_v3	803124	814802	Pf3D7_06_v3	PF3D7_0619300	conserved Plasmodium protein, unknown function	-0.078185	0.001538	-0.008423	0.074654	0.02514
Pf3D7_06_v3	815372	818497	Pf3D7_06_v3	PF3D7_0619400	cell division cycle protein 48 homologue, putative	0.040994	0.02463	0.042265	0.104148	0.07526
Pf3D7_06_v3	819819	824497	Pf3D7_06_v3	PF3D7_0619500	acyl-CoA synthetase	-0.112276	-0.034421	-0.000779	0.084134	0.009659
Pf3D7_06_v3	824907	827985	Pf3D7_06_v3	PF3D7_0619600	conserved Plasmodium protein, unknown function	-0.04668	-0.011086	-0.005639	-0.096842	-0.041406
Pf3D7_06_v3	827986	830639	Pf3D7_06_v3	PF3D7_0619700	conserved protein, unknown function	-0.071124	-0.036226	-0.083847	0.110714	0.028552
Pf3D7_06_v3	831036	839283	Pf3D7_06_v3	PF3D7_0619800	conserved Plasmodium membrane protein, unknown function	0.035484	-0.030037	-0.056567	0.018742	0.038276
Pf3D7_06_v3	840273	841474	Pf3D7_06_v3	PF3D7_0619900	splicing factor 3A subunit 2, putative	0.176175	-0.013747	0.005481	0.061529	0.125872
Pf3D7_06_v3	841596	843613	Pf3D7_06_v3	PF3D7_0620000	secreted ookinete protein 25, putative	0.213308	0.05938	0.07121	-0.184126	-0.144238
Pf3D7_06_v3	845410	846340	Pf3D7_06_v3	PF3D7_0620100	ATP synthase-associated protein, putative	0.014731	-0.065133	-0.052324	0.07607	-0.013007
Pf3D7_06_v3	846341	847744	Pf3D7_06_v3	PF3D7_0620200	conserved Plasmodium protein, unknown function	-0.250802	-0.064004	0.011496	-0.362389	-0.187076
Pf3D7_06_v3	848155	851114	Pf3D7_06_v3	PF3D7_0620300	conserved Plasmodium protein, unknown function	0.088296	-0.04459	0.00722	0.005286	0.067226
Pf3D7_06_v3	851128	853205	Pf3D7_06_v3	PF3D7_0620400	merozoite surface protein 10	0.132694	-0.003613	0.027572	0.05373	0.085301
Pf3D7_06_v3	854910	857362	Pf3D7_06_v3	PF3D7_0620500	cleavage stimulation factor subunit 1, putative	0.042995	-0.053756	0.034244	-0.048366	0.007612
Pf3D7_06_v3	857476	858818	Pf3D7_06_v3	PF3D7_0620600	conserved Plasmodium protein, unknown function	0.024419	-0.10417	-0.237486	-0.200825	-0.198725
Pf3D7_06_v3	858819	860364	Pf3D7_06_v3	PF3D7_0620700	DnaJ protein, putative	0.030966	0.059599	0.024033	0.084384	0.085431
Pf3D7_06_v3	862632	865630	Pf3D7_06_v3	PF3D7_0621000	conserved Plasmodium protein, unknown function	0.007579	-0.023454	-0.038892	0.055477	0.010479
Pf3D7_06_v3	865631	870159	Pf3D7_06_v3	PF3D7_0621100	conserved Plasmodium protein, unknown function	0.019929	0.038589	0.078776	0.081526	0.086252
Pf3D7_06_v3	871047	872452	Pf3D7_06_v3	PF3D7_0621200	pyridoxine biosynthesis protein PDX1	0.087981	-0.002408	-0.014736	-0.082525	-0.009032
Pf3D7_06_v3	873559	876440	Pf3D7_06_v3	PF3D7_0621300	mRNA-binding protein PUF3	-0.02069	-0.081053	-0.09711	-0.096939	-0.08545
Pf3D7_06_v3	878540	881034	Pf3D7_06_v3	PF3D7_0621400	Pf77 protein	0.024821	-0.034686	-0.013902	0.124637	0.077616
Pf3D7_06_v3	881713	883244	Pf3D7_06_v3	PF3D7_0621500	ribonuclease P/MRP protein subunit RPP1, putative	-0.008012	-0.09081	-0.140852	-0.151429	-0.057889
Pf3D7_06_v3	884178	889864	Pf3D7_06_v3	PF3D7_0621700	conserved Plasmodium protein, unknown function	0.00939	-0.033171	-0.047204	-0.032012	0.005649
Pf3D7_06_v3	891747	893027	Pf3D7_06_v3	PF3D7_0621800	nascent polypeptide-associated complex subunit alpha, putative	0.134026	0.15106	0.062382	0.381553	0.31208
Pf3D7_06_v3	893200	896030	Pf3D7_06_v3	PF3D7_0621900	signal recognition particle subunit SRP68, putative	0.046401	0.017605	-0.011496	-0.037394	0.003107
Pf3D7_06_v3	896739	898154	Pf3D7_06_v3	PF3D7_0622000	conserved Plasmodium protein, unknown function	0.070684	-0.085217	-0.059856	-0.082372	-0.081676
Pf3D7_06_v3	898155	902613	Pf3D7_06_v3	PF3D7_0622100	conserved Plasmodium protein, unknown function	0.022944	-0.058084	-0.0256	-0.006859	0.002785
Pf3D7_06_v3	903490	906572	Pf3D7_06_v3	PF3D7_0622200	radical SAM protein, putative	0.166046	0.012256	0.036788	-0.024647	0.014103
Pf3D7_06_v3	907767	911299	Pf3D7_06_v3	PF3D7_0622300	vacuolar transporter chaperone, putative	0.060994	-0.036224	-0.041734	-0.10873	-0.025588
Pf3D7_06_v3	912156	913960	Pf3D7_06_v3	PF3D7_0622500	RNA methyltransferase, putative	0.217184	0.032082	-0.017175	-0.116952	-0.037636
Pf3D7_06_v3	914493	915679	Pf3D7_06_v3	PF3D7_0622600	cytochrome b-c1 complex subunit 9, putative	0.060068	0.16592	-0.001016	-0.199316	-0.062701
Pf3D7_06_v3	915750	917549	Pf3D7_06_v3	PF3D7_0622700	conserved Plasmodium membrane protein, unknown function	-0.005938	-0.112357	-0.105117	-0.171607	-0.068802
Pf3D7_06_v3	919435	924278	Pf3D7_06_v3	PF3D7_0622800	leucine--tRNA ligase, putative	-0.009725	0.008947	-0.0315	0.11031	0.067374
Pf3D7_06_v3	924855	931324	Pf3D7_06_v3	PF3D7_0622900	AP2 domain transcription factor AP2Tel	0.014634	0.012968	0.034159	-0.004806	0.034857
Pf3D7_06_v3	936818	938901	Pf3D7_06_v3	PF3D7_0623000	chorismate synthase	0.022707	-0.031091	-0.023957	-0.011021	-0.018401
Pf3D7_06_v3	939410	943970	Pf3D7_06_v3	PF3D7_0623100	nuclear polyadenylated RNA-binding protein NAB2, putative	0.079367	-0.029089	-0.025991	-0.066515	-0.005765
Pf3D7_06_v3	945879	947368	Pf3D7_06_v3	PF3D7_0623200	ferredoxin--NADP reductase	0.076379	-0.015591	-0.034637	0.084345	0.06919
Pf3D7_06_v3	947369	948894	Pf3D7_06_v3	PF3D7_0623300	EGF-like membrane protein, putative	0.166924	0.03183	-0.046671	0.024851	0.033939
Pf3D7_06_v3	949973	951756	Pf3D7_06_v3	PF3D7_0623400	MEI2-like RNA-binding protein, putative	-0.080884	-0.122522	-0.068444	-0.185053	-0.055595
Pf3D7_06_v3	952656	955098	Pf3D7_06_v3	PF3D7_0623500	superoxide dismutase [Fe]	0.184661	-0.103061	-0.008204	0.139903	0.080667
Pf3D7_06_v3	956515	958944	Pf3D7_06_v3	PF3D7_0623600	transcription or splicing factor-like protein, putative	-0.017002	-0.044303	-0.024435	-0.100386	-0.041034
Pf3D7_06_v3	958945	962795	Pf3D7_06_v3	PF3D7_0623700	ATP-dependent RNA helicase SUV3, putative	0.044843	-0.075619	-0.073429	-0.036828	-0.056422
Pf3D7_06_v3	963491	971205	Pf3D7_06_v3	PF3D7_0623800	tyrosine kinase-like protein, putative	-0.10077	-0.107871	-0.108485	-0.12816	-0.106905
Pf3D7_06_v3	976933	978299	Pf3D7_06_v3	PF3D7_0623900	ribonuclease H2 subunit A, putative	0.091624	-0.076835	-0.091214	0.062033	-0.109431
Pf3D7_06_v3	980816	982797	Pf3D7_06_v3	PF3D7_0624000	hexokinase	-0.001772	-0.039779	-0.061018	-0.138359	-0.129557
Pf3D7_06_v3	983696	985018	Pf3D7_06_v3	PF3D7_0624100	conserved protein, unknown function	0.048584	-0.028803	-0.079979	0.01359	-0.084241
Pf3D7_06_v3	985019	987120	Pf3D7_06_v3	PF3D7_0624200	conserved Plasmodium protein, unknown function	-0.00585	-0.024576	-0.049986	0.009998	0.040892
Pf3D7_06_v3	987558	989886	Pf3D7_06_v3	PF3D7_0624300	CPW-WPC family protein	0.014273	0.00026	0.013452	0.205303	0.129211
Pf3D7_06_v3	990125	992448	Pf3D7_06_v3	PF3D7_0624400	conserved protein, unknown function	-0.013432	-0.140062	-0.0503	-0.019619	-0.041418
Pf3D7_06_v3	994034	994803	Pf3D7_06_v3	PF3D7_0624500	anaphase-promoting complex subunit 11, putative	-0.142075	-0.099271	-0.098498	-0.207494	-0.114791
Pf3D7_06_v3	999274	1007933	Pf3D7_06_v3	PF3D7_0624600	SNF2 helicase, putative	-0.016155	-0.006146	-0.024643	-0.081307	-0.01054
Pf3D7_06_v3	1009207	1010968	Pf3D7_06_v3	PF3D7_0624700	N-acetylglucosaminyl-phosphatidylinositol de-N-acetylase, putative	0.091726	0.122255	0.080015	-0.045067	0.003311
Pf3D7_06_v3	1011179	1014819	Pf3D7_06_v3	PF3D7_0624800	conserved Plasmodium protein, unknown function	-0.010522	0.021029	-0.056519	-0.059976	-0.014843
Pf3D7_06_v3	1015618	1018694	Pf3D7_06_v3	PF3D7_0624900	GAS8-like protein, putative	0.028816	-0.013195	-0.049843	-0.168326	-0.042434
Pf3D7_06_v3	1019774	1022125	Pf3D7_06_v3	PF3D7_0625000	sphingomyelin synthase 1, putative	-0.068705	-0.008391	-0.063177	-0.025687	-0.009499
Pf3D7_06_v3	1022765	1024464	Pf3D7_06_v3	PF3D7_0625100	sphingomyelin synthase 2, putative	0.083071	0.057659	0.019102	-0.063645	-0.006034
Pf3D7_06_v3	1024929	1026579	Pf3D7_06_v3	PF3D7_0625200	conserved Plasmodium protein, unknown function	-0.106312	0.024377	0.081477	-0.076572	-0.056144
Pf3D7_06_v3	1026580	1031407	Pf3D7_06_v3	PF3D7_0625300	DNA polymerase 1, putative	-0.101849	-0.108545	-0.087011	-0.048873	-0.021511
Pf3D7_06_v3	1032286	1034024	Pf3D7_06_v3	PF3D7_0625400	conserved Plasmodium protein, unknown function	-0.095285	-0.192658	-0.123396	-0.097037	-0.044924
Pf3D7_06_v3	1035108	1036621	Pf3D7_06_v3	PF3D7_0625500	conserved Plasmodium membrane protein, unknown function	-0.113264	-0.005988	0.079038	0.045396	-0.074257
Pf3D7_06_v3	1039405	1041800	Pf3D7_06_v3	PF3D7_0625600	poly(A) polymerase PAP, putative	-0.005327	0.047493	-0.004948	0.19874	0.026041
Pf3D7_06_v3	1043296	1045724	Pf3D7_06_v3	PF3D7_0625800	conserved Plasmodium protein, unknown function	-0.060089	-0.048891	-0.058615	-0.013009	-0.055548
Pf3D7_06_v3	1046736	1048302	Pf3D7_06_v3	PF3D7_0625900	conserved Plasmodium protein, unknown function	0.012614	0.033098	-0.043501	-0.070772	-0.067993
Pf3D7_06_v3	1048460	1054215	Pf3D7_06_v3	PF3D7_0626000	conserved Plasmodium protein, unknown function	-0.041279	-0.041609	-0.005531	-0.236932	-0.082259
Pf3D7_06_v3	1055802	1058597	Pf3D7_06_v3	PF3D7_0626100	oxidoreductase, short-chain dehydrogenase family, putative	0.043007	0.064998	0.031842	-0.137641	-0.023533
Pf3D7_06_v3	1058598	1060172	Pf3D7_06_v3	PF3D7_0626200	conserved Plasmodium protein, unknown function	-0.005187	-0.089755	-0.051993	-0.195024	-0.114919
Pf3D7_06_v3	1060865	1063141	Pf3D7_06_v3	PF3D7_0626300	3-oxoacyl-acyl-carrier protein synthase I/II	0.002385	-0.029508	-0.052317	0.169265	0.087596
Pf3D7_06_v3	1064897	1068876	Pf3D7_06_v3	PF3D7_0626400	CRAL/TRIO domain-containing protein, putative	-0.002517	0.017486	0.021455	0.065056	0.009767
Pf3D7_06_v3	1069712	1073055	Pf3D7_06_v3	PF3D7_0626500	conserved Plasmodium protein, unknown function	0.030925	0.047627	0.018862	0.114125	0.046349
Pf3D7_06_v3	1073208	1074145	Pf3D7_06_v3	PF3D7_0626600	conserved Plasmodium protein, unknown function	-0.059321	0.155353	0.086733	0.143283	0.071161
Pf3D7_06_v3	1074768	1076386	Pf3D7_06_v3	PF3D7_0626700	ATPase	-0.066448	-0.007906	0.005874	0.154029	0.048116
Pf3D7_06_v3	1078745	1081570	Pf3D7_06_v3	PF3D7_0626800	pyruvate kinase	-0.038411	0.010186	-0.058116	-0.133246	-0.085095
Pf3D7_06_v3	1082660	1084268	Pf3D7_06_v3	PF3D7_0626900	mitochondrial ribosomal protein L46 precursor, putative	-0.068631	-0.077882	-0.022423	0.033855	-0.091818
Pf3D7_06_v3	1088940	1094578	Pf3D7_06_v3	PF3D7_0627100	ankyrin-repeat protein, putative	-0.050395	-0.096861	-0.075217	-0.015741	-0.006856
Pf3D7_06_v3	1094815	1096623	Pf3D7_06_v3	PF3D7_0627200	myosin light chain, putative	0.116458	0.115984	0.188871	0.228587	0.177366
Pf3D7_06_v3	1097050	1098899	Pf3D7_06_v3	PF3D7_0627300	E3 ubiquitin-protein ligase RNF5, putative	-0.053231	0.015893	0.013147	0.069017	0.002127
Pf3D7_06_v3	1100027	1101108	Pf3D7_06_v3	PF3D7_0627400	mitochondrial import inner membrane translocase subunit TIM22, putative	-0.20803	-0.096143	-0.0982	-0.162803	-0.123464
Pf3D7_06_v3	1101484	1103102	Pf3D7_06_v3	PF3D7_0627500	protein DJ-1	-0.027043	-0.043822	-0.055571	0.032256	-0.040178
Pf3D7_06_v3	1103765	1105449	Pf3D7_06_v3	PF3D7_0627600	conserved Plasmodium protein, unknown function	-0.186521	-0.028231	0.042206	-0.116022	-0.110161
Pf3D7_06_v3	1107947	1111890	Pf3D7_06_v3	PF3D7_0627700	transportin	-0.12793	-0.013275	-0.034625	-0.004706	-0.007942
Pf3D7_06_v3	1114294	1117787	Pf3D7_06_v3	PF3D7_0627800	acetyl-CoA synthetase, putative	-0.020088	-0.00666	-0.063573	0.173657	0.094507
Pf3D7_06_v3	1119337	1121108	Pf3D7_06_v3	PF3D7_0627900	ribonuclease P protein subunit p29, putative	-0.113625	0.005161	0.072696	0.060897	-0.009451
Pf3D7_06_v3	1121440	1122461	Pf3D7_06_v3	PF3D7_0628000	6-pyruvoyltetrahydropterin synthase	0.002091	0.102032	0.145632	0.190569	0.190562
Pf3D7_06_v3	1122551	1153914	Pf3D7_06_v3	PF3D7_0628100	HECT-domain (ubiquitin-transferase), putative	0.062989	0.10139	0.09346	0.257042	0.190887
Pf3D7_06_v3	1159612	1169330	Pf3D7_06_v3	PF3D7_0628200	eukaryotic translation initiation factor 2-alpha kinase	-0.054626	-0.010275	-0.047707	0.096401	0.076837
Pf3D7_06_v3	1170563	1173946	Pf3D7_06_v3	PF3D7_0628300	choline/ethanolaminephosphotransferase, putative	-0.014057	0.080132	0.074962	0.086111	0.092065
Pf3D7_06_v3	1176015	1178820	Pf3D7_06_v3	PF3D7_0628400	protease, putative	-0.119045	-0.014355	0.017709	0.016949	0.050641
Pf3D7_06_v3	1178821	1180253	Pf3D7_06_v3	PF3D7_0628500	conserved Plasmodium protein, unknown function	-0.122994	-0.003202	-0.000607	-0.024945	-0.026659
Pf3D7_06_v3	1180323	1182603	Pf3D7_06_v3	PF3D7_0628600	DNA methyltransferase 1-associated protein 1, putative	-0.006377	0.053454	0.175694	0.001189	0.007491
Pf3D7_06_v3	1183646	1185806	Pf3D7_06_v3	PF3D7_0628700	conserved Plasmodium protein, unknown function	0.069087	0.072558	0.089242	0.058719	0.14369
Pf3D7_06_v3	1185807	1188894	Pf3D7_06_v3	PF3D7_0628800	glutamyl-tRNA(Gln) amidotransferase subunit B	-0.146666	-0.066134	-0.06798	0.045286	0.023634
Pf3D7_06_v3	1189222	1194141	Pf3D7_06_v3	PF3D7_0628900	RAP protein, putative	0.003918	0.018315	0.010572	0.119247	0.014189
Pf3D7_06_v3	1194142	1195429	Pf3D7_06_v3	PF3D7_0629000	glucosamine 6-phosphate N-acetyltransferase	-0.069074	-0.004533	0.0511	0.148934	0.044362
Pf3D7_06_v3	1195791	1198288	Pf3D7_06_v3	PF3D7_0629100	nicotinate phosphoribosyltransferase, putative	-0.129916	-0.033328	-0.07288	0.196405	0.021946
Pf3D7_06_v3	1199603	1201245	Pf3D7_06_v3	PF3D7_0629200	DnaJ protein, putative	0.063397	0.073481	0.016476	0.063868	0.062398
Pf3D7_06_v3	1204940	1208031	Pf3D7_06_v3	PF3D7_0629300	phospholipase, putative	-0.187132	-0.081777	-0.101744	-0.04463	-0.06128
Pf3D7_06_v3	1210170	1213012	Pf3D7_06_v3	PF3D7_0629400	polyadenylate-binding protein 3, putative	-0.054966	0.023098	0.005726	0.19061	0.070416
Pf3D7_06_v3	1213698	1216255	Pf3D7_06_v3	PF3D7_0629500	amino acid transporter AAT1	0.057846	-0.010691	0.028754	0.53255	0.284445
Pf3D7_06_v3	1218057	1219501	Pf3D7_06_v3	PF3D7_0629600	RNA-binding protein, putative	-0.063419	-0.009067	0.000308	0.076702	0.047216
Pf3D7_06_v3	1221691	1243172	Pf3D7_06_v3	PF3D7_0629700	SET domain protein, putative	-0.080156	-0.031235	0.029948	-0.138009	-0.093062
Pf3D7_06_v3	1243330	1247469	Pf3D7_06_v3	PF3D7_0629800	cullin-like protein, putative	0.120472	0.063003	-0.006831	0.168621	0.046631
Pf3D7_06_v3	1250162	1251851	Pf3D7_06_v3	PF3D7_0629900	sec14-like cytosolic factor or phosphatidylinositol/phosphatidylcholine transfer protein, putative	0.071146	0.158835	0.056463	0.013131	0.032895
Pf3D7_06_v3	1251852	1254235	Pf3D7_06_v3	PF3D7_0630000	CPW-WPC family protein	-0.074311	-0.020721	-0.046985	-0.029716	-0.044597
Pf3D7_06_v3	1254657	1257190	Pf3D7_06_v3	PF3D7_0630100	conserved Plasmodium protein, unknown function	0.079609	0.109617	0.091051	-0.015943	0.042301
Pf3D7_06_v3	1258630	1260168	Pf3D7_06_v3	PF3D7_0630200	secreted ookinete protein, putative	-0.014344	0.018473	0.007275	0.072375	0.044122
Pf3D7_06_v3	1260169	1269846	Pf3D7_06_v3	PF3D7_0630300	DNA polymerase epsilon catalytic subunit A, putative	-0.311599	-0.024022	-0.016895	-0.08223	-0.063672
Pf3D7_06_v3	1272113	1273782	Pf3D7_06_v3	PF3D7_0630400	conserved Plasmodium protein, unknown function	-0.207963	-0.113216	-0.073617	-0.004186	-0.041012
Pf3D7_06_v3	1276079	1278075	Pf3D7_06_v3	PF3D7_0630500	ribosome biogenesis protein YTM1, putative	-0.020393	0.003115	0.013762	0.186484	0.060235
Pf3D7_06_v3	1279570	1283496	Pf3D7_06_v3	PF3D7_0630600	conserved protein, unknown function	-0.140936	-0.076432	0.003474	0.212462	0.048147
Pf3D7_06_v3	1284808	1287281	Pf3D7_06_v3	PF3D7_0630700	bifunctional methylenetetrahydrofolate dehydrogenase/cyclohydrolase, putative	-0.066365	0.011609	0.012291	0.181353	0.117535
Pf3D7_06_v3	1287987	1290920	Pf3D7_06_v3	PF3D7_0630800	TPH domain-containing protein, putative	-0.102677	0.006041	0.079225	0.194526	0.119618
Pf3D7_06_v3	1290921	1293222	Pf3D7_06_v3	PF3D7_0630900	ATP-dependent RNA helicase HAS1	-0.09086	-0.026787	0.02289	0.352283	0.191128
Pf3D7_06_v3	1313458	1315503	Pf3D7_06_v3	PF3D7_0631200	erythrocyte membrane protein 1 (PfEMP1), pseudogene	-0.154288	-0.115609	-0.053201	-0.154607	-0.172978
Pf3D7_06_v3	1329521	1331213	Pf3D7_06_v3	PF3D7_0631800	rifin	0.060708	-0.031249	-0.005003	0.363758	0.104862
Pf3D7_06_v3	1332763	1334285	Pf3D7_06_v3	PF3D7_0631900	stevor	-0.098281	-0.032139	-0.056465	0.302174	0.146473
Pf3D7_06_v3	1337968	1339667	Pf3D7_06_v3	PF3D7_0632100	rifin	-0.075213	-0.00012	-0.075897	-0.019825	-0.08674
Pf3D7_06_v3	1347091	1348821	Pf3D7_06_v3	PF3D7_0632300	rifin	-0.036734	-0.075248	-0.089475	0.242259	0.072429
Pf3D7_06_v3	1353696	1366680	Pf3D7_06_v3	PF3D7_0632500	erythrocyte membrane protein 1, PfEMP1	-0.176938	-0.081848	-0.116067	0.040876	-0.081617
Pf3D7_06_v3	1367662	1369357	Pf3D7_06_v3	PF3D7_0632600	rifin, pseudogene	0.056938	0.050152	0.009088	0.232484	0.136806
Pf3D7_06_v3	1371251	1373111	Pf3D7_06_v3	PF3D7_0632700	rifin	-0.027474	0.149588	0.104369	0.524543	0.231972
Pf3D7_06_v3	1374547	1382877	Pf3D7_06_v3	PF3D7_0632800	erythrocyte membrane protein 1, PfEMP1	0.058721	-0.034224	-0.050167	0.295279	0.121927
Pf3D7_07_v3	20057	28333	Pf3D7_07_v3	PF3D7_0700100	erythrocyte membrane protein 1, PfEMP1	0.094851	0.009049	0.03087	0.308093	0.230161
Pf3D7_07_v3	36672	38177	Pf3D7_07_v3	PF3D7_0700400	stevor	0.111613	-0.025089	-0.013905	0.464837	0.167298
Pf3D7_07_v3	75668	77305	Pf3D7_07_v3	PF3D7_0701800	rifin	-0.100271	-0.06559	-0.055895	0.310685	0.121812
Pf3D7_07_v3	79640	83193	Pf3D7_07_v3	PF3D7_0701900	Plasmodium exported protein, unknown function	0.073268	-0.052991	0.041214	0.717681	0.28205
Pf3D7_07_v3	84547	85924	Pf3D7_07_v3	PF3D7_0702000	Plasmodium exported protein (hyp12), unknown function	-0.08712	-0.079795	-0.154845	0.37303	0.097123
Pf3D7_07_v3	88435	91136	Pf3D7_07_v3	PF3D7_0702100	Plasmodium exported protein (PHISTb), unknown function, pseudogene	-0.067625	-0.002532	-0.011405	0.376444	0.233592
Pf3D7_07_v3	91617	93391	Pf3D7_07_v3	PF3D7_0702200	lysophospholipase, putative	-0.070267	-0.053409	-0.086776	0.183217	0.03392
Pf3D7_07_v3	96511	98980	Pf3D7_07_v3	PF3D7_0702300	sporozoite threonine and asparagine-rich protein	-0.007756	-0.01694	-0.11026	0.509255	0.204603
Pf3D7_07_v3	101444	102535	Pf3D7_07_v3	PF3D7_0702400	small exported membrane protein 1	-0.066755	-0.071876	-0.095381	0.278834	0.14663
Pf3D7_07_v3	104707	106239	Pf3D7_07_v3	PF3D7_0702500	Plasmodium exported protein, unknown function	-0.068603	-0.040323	-0.039882	0.151874	0.04044
Pf3D7_07_v3	109665	110428	Pf3D7_07_v3	PF3D7_0702600	chitinase precursor fragment, truncated	-0.107749	-0.103433	-0.156044	0.233814	0.036255
Pf3D7_07_v3	112894	114198	Pf3D7_07_v3	PF3D7_0702900	centrin, putative	-0.114681	-0.054797	-0.077492	-0.135824	-0.076468
Pf3D7_07_v3	114989	121020	Pf3D7_07_v3	PF3D7_0703000	conserved Plasmodium protein, unknown function	-0.080305	0.014855	-0.020535	0.251815	0.102069
Pf3D7_07_v3	121164	122206	Pf3D7_07_v3	PF3D7_0703100	cytosolic iron-sulfur assembly component 2, putative	-0.295653	-0.10602	-0.093349	-0.013258	-0.072285
Pf3D7_07_v3	122263	127385	Pf3D7_07_v3	PF3D7_0703200	conserved Plasmodium protein, unknown function	-0.107004	-0.017095	-0.068491	-0.085877	-0.104342
Pf3D7_07_v3	128290	129175	Pf3D7_07_v3	PF3D7_0703300	conserved Plasmodium protein, unknown function	-0.057688	-0.026265	-0.030466	0.195165	0.025259
Pf3D7_07_v3	129176	132082	Pf3D7_07_v3	PF3D7_0703400	conserved Plasmodium protein, unknown function	-0.014509	-0.100482	-0.101336	0.091303	0.010506
Pf3D7_07_v3	135356	142755	Pf3D7_07_v3	PF3D7_0703500	erythrocyte membrane-associated antigen	-0.01849	-0.097317	-0.087277	0.161671	0.083335
Pf3D7_07_v3	143769	146203	Pf3D7_07_v3	PF3D7_0703600	conserved protein, unknown function	0.091677	0.035052	0.07482	0.106638	0.222966
Pf3D7_07_v3	146395	147644	Pf3D7_07_v3	PF3D7_0703700	conserved protein, unknown function	-0.061482	-0.06487	-0.048568	0.030854	0.042327
Pf3D7_07_v3	149554	153150	Pf3D7_07_v3	PF3D7_0703800	conserved Plasmodium protein, unknown function	-0.104073	-0.054895	-0.013951	0.099829	0.090707
Pf3D7_07_v3	153151	166646	Pf3D7_07_v3	PF3D7_0703900	conserved Plasmodium membrane protein, unknown function	-0.111448	0.107804	0.118992	0.121336	0.085784
Pf3D7_07_v3	167239	177545	Pf3D7_07_v3	PF3D7_0704000	conserved Plasmodium membrane protein, unknown function	-0.172282	0.101411	0.112981	0.080326	0.009588
Pf3D7_07_v3	179786	190965	Pf3D7_07_v3	PF3D7_0704100	conserved Plasmodium membrane protein, unknown function	-0.088337	-0.000948	-0.025461	0.054798	-0.024604
Pf3D7_07_v3	191059	195140	Pf3D7_07_v3	PF3D7_0704200	tRNA m5C-methyltransferase, putative	-0.114727	-0.019817	-0.012903	0.082434	0.057091
Pf3D7_07_v3	197441	203499	Pf3D7_07_v3	PF3D7_0704300	conserved Plasmodium membrane protein, unknown function	-0.119431	-0.032328	-0.071431	0.172927	0.083375
Pf3D7_07_v3	204468	208000	Pf3D7_07_v3	PF3D7_0704400	phosphoinositide-binding protein, putative	-0.162064	-0.006159	-0.043847	0.062758	0.044859
Pf3D7_07_v3	208440	213751	Pf3D7_07_v3	PF3D7_0704500	serine/threonine protein kinase, putative	-0.08336	0.13326	0.040768	0.266843	0.167711
Pf3D7_07_v3	215774	229322	Pf3D7_07_v3	PF3D7_0704600	E3 ubiquitin-protein ligase	-0.135069	0.013179	-0.02455	0.158969	0.085154
Pf3D7_07_v3	233151	237664	Pf3D7_07_v3	PF3D7_0704700	phosphopantetheine adenylyltransferase, putative	-0.057493	-0.053259	-0.022883	0.101373	0.041678
Pf3D7_07_v3	237909	242302	Pf3D7_07_v3	PF3D7_0704800	protein phosphatase PPM12, putative	-0.071865	-0.02001	-0.015659	0.098524	0.020907
Pf3D7_07_v3	243648	245266	Pf3D7_07_v3	PF3D7_0704900	peptide chain release factor 2	-0.060181	0.031612	0.01194	0.096583	0.096032
Pf3D7_07_v3	246009	250402	Pf3D7_07_v3	PF3D7_0705000	mRNA cap guanine-N7 methyltransferase, putative	0.132697	-0.037799	-0.036097	0.066496	0.06964
Pf3D7_07_v3	252032	255501	Pf3D7_07_v3	PF3D7_0705100	conserved Plasmodium protein, unknown function	0.060583	-0.010046	0.051835	0.128499	0.095648
Pf3D7_07_v3	255836	260934	Pf3D7_07_v3	PF3D7_0705200	conserved Plasmodium protein, unknown function	0.032417	-0.05073	-0.075668	0.063332	0.046926
Pf3D7_07_v3	261727	264704	Pf3D7_07_v3	PF3D7_0705300	origin recognition complex subunit 2	-0.011818	-0.037553	-0.030562	0.017663	0.016614
Pf3D7_07_v3	264723	267688	Pf3D7_07_v3	PF3D7_0705400	DNA replication licensing factor MCM7	-0.014923	-0.053814	-0.012076	-0.097871	-0.087944
Pf3D7_07_v3	269772	278956	Pf3D7_07_v3	PF3D7_0705500	inositol-phosphate phosphatase, putative	-0.069868	-0.035843	-0.091694	-0.164684	-0.119618
Pf3D7_07_v3	280785	284683	Pf3D7_07_v3	PF3D7_0705600	RNA helicase, putative	0.115151	0.041584	-0.009498	0.132409	0.086699
Pf3D7_07_v3	285222	286416	Pf3D7_07_v3	PF3D7_0705700	40S ribosomal protein S29, putative	0.057266	0.044656	0.040037	0.07245	0.043114
Pf3D7_07_v3	287347	289338	Pf3D7_07_v3	PF3D7_0705800	cysteine-rich secretory protein, putative	0.009231	0.014427	0.033247	-0.029579	-0.016896
Pf3D7_07_v3	289850	291470	Pf3D7_07_v3	PF3D7_0705900	ATP synthase subunit C, putative	-0.097947	-0.035366	-0.041342	-0.091342	-0.033286
Pf3D7_07_v3	293150	297297	Pf3D7_07_v3	PF3D7_0706000	importin-7, putative	0.042252	-0.048338	-0.007231	-0.273157	-0.203574
Pf3D7_07_v3	297298	303309	Pf3D7_07_v3	PF3D7_0706100	conserved Plasmodium protein, unknown function	-0.097583	-0.006045	0.01183	0.093474	-0.011977
Pf3D7_07_v3	305313	306282	Pf3D7_07_v3	PF3D7_0706300	conserved Plasmodium protein, unknown function	-0.082566	0.123067	0.06144	0.237197	0.153071
Pf3D7_07_v3	309652	315272	Pf3D7_07_v3	PF3D7_0706500	conserved Plasmodium protein, unknown function	-0.081857	-0.013027	-0.040564	0.027921	-0.032346
Pf3D7_07_v3	319998	322531	Pf3D7_07_v3	PF3D7_0706600	conserved Plasmodium protein, unknown function	-0.091994	-0.105345	-0.130926	-0.088869	-0.043586
Pf3D7_07_v3	322657	325778	Pf3D7_07_v3	PF3D7_0706700	DNA mismatch repair protein MSH2, putative	-0.034687	-0.11004	-0.094495	-0.047877	-0.091739
Pf3D7_07_v3	329686	336575	Pf3D7_07_v3	PF3D7_0707200	conserved Plasmodium protein, unknown function	-0.077238	-0.085422	-0.11179	0.080547	-0.005001
Pf3D7_07_v3	338635	342333	Pf3D7_07_v3	PF3D7_0707300	rhoptry-associated membrane antigen	-0.057965	-0.053286	-0.081738	-0.07092	-0.106133
Pf3D7_07_v3	343662	346153	Pf3D7_07_v3	PF3D7_0707400	AAA family ATPase, putative	-0.067474	-0.104041	-0.093288	0.000374	-0.071043
Pf3D7_07_v3	348027	353332	Pf3D7_07_v3	PF3D7_0707500	conserved Plasmodium protein, unknown function	0.026413	-0.076637	-0.108126	-0.074389	-0.062267
Pf3D7_07_v3	353736	354970	Pf3D7_07_v3	PF3D7_0707600	mediator of RNA polymerase II transcription subunit 10, putative	0.124163	0.00363	-0.010377	0.115989	0.011426
Pf3D7_07_v3	357450	360835	Pf3D7_07_v3	PF3D7_0707700	E3 ubiquitin-protein ligase, putative	-0.118776	-0.103713	-0.116051	-0.177975	-0.132292
Pf3D7_07_v3	361755	366029	Pf3D7_07_v3	PF3D7_0707800	RAP protein, putative	0.080023	-0.123485	0.048295	-0.151275	-0.096897
Pf3D7_07_v3	366679	367958	Pf3D7_07_v3	PF3D7_0707900	ribosomal protein S8e, putative	0.092257	-0.024851	-0.041831	0.087015	0.054918
Pf3D7_07_v3	368457	371922	Pf3D7_07_v3	PF3D7_0708000	cytoskeleton associated protein, putative	0.068656	0.016093	0.006141	0.023811	0.01246
Pf3D7_07_v3	372647	373356	Pf3D7_07_v3	PF3D7_0708100	DNA-directed RNA polymerases I, II, and III subunit RPABC5, putative	-0.06919	0.045565	0.011085	-0.020213	0.006643
Pf3D7_07_v3	373993	377643	Pf3D7_07_v3	PF3D7_0708200	conserved Plasmodium protein, unknown function	-0.000867	-0.046369	0.013982	0.165086	0.074718
Pf3D7_07_v3	377781	379555	Pf3D7_07_v3	PF3D7_0708300	EKC/KEOPS complex subunit BUD32	-0.115314	-0.03494	-0.034159	0.028258	-0.068982
Pf3D7_07_v3	381342	384864	Pf3D7_07_v3	PF3D7_0708400	heat shock protein 90	0.022627	-0.03582	-0.033582	-0.012117	0.089918
Pf3D7_07_v3	385333	388571	Pf3D7_07_v3	PF3D7_0708500	heat shock protein 86 family protein	-0.003072	-0.010717	0.02994	0.13269	0.036991
Pf3D7_07_v3	389223	390615	Pf3D7_07_v3	PF3D7_0708600	inner membrane complex protein 1d, putative	0.016246	-0.011166	0.037973	0.020301	0.041905
Pf3D7_07_v3	391252	392438	Pf3D7_07_v3	PF3D7_0708700	Cg8 protein	-0.058974	-0.111397	0.005489	-0.011143	-0.003269
Pf3D7_07_v3	395461	398582	Pf3D7_07_v3	PF3D7_0708800	heat shock protein 110	-0.119882	0.014346	-0.080876	-0.009149	0.016652
Pf3D7_07_v3	399040	400493	Pf3D7_07_v3	PF3D7_0708900	protein SCO1, putative	0.021774	-0.019992	-0.069301	-0.030214	0.009808
Pf3D7_07_v3	402972	406567	Pf3D7_07_v3	PF3D7_0709000	chloroquine resistance transporter	0.088803	0.013939	-0.021157	-0.019645	-0.013782
Pf3D7_07_v3	407965	412152	Pf3D7_07_v3	PF3D7_0709100	Cg1 protein	0.120364	0.092506	-0.000611	-0.024699	0.024459
Pf3D7_07_v3	412153	413360	Pf3D7_07_v3	PF3D7_0709200	glutaredoxin-like protein	0.000582	-0.061048	-0.064408	-0.022886	0.008543
Pf3D7_07_v3	413361	421999	Pf3D7_07_v3	PF3D7_0709300	Cg2 protein	0.001655	0.079749	0.013876	-0.1681	-0.125334
Pf3D7_07_v3	422986	427484	Pf3D7_07_v3	PF3D7_0709400	Cg7 protein	-0.014121	-0.051858	-0.074558	0.041983	-0.01617
Pf3D7_07_v3	429607	434008	Pf3D7_07_v3	PF3D7_0709600	ribonucleases P/MRP protein subunit POP1, putative	-0.021608	-0.103812	-0.087955	-0.073453	-0.133558
Pf3D7_07_v3	434839	436445	Pf3D7_07_v3	PF3D7_0709700	prodrug activation and resistance esterase	0.032881	-0.037273	-0.062161	-0.136698	-0.097299
Pf3D7_07_v3	438326	446131	Pf3D7_07_v3	PF3D7_0709900	conserved protein, unknown function	-0.04282	-0.058069	-0.085478	-0.167134	-0.097862
Pf3D7_07_v3	447265	458746	Pf3D7_07_v3	PF3D7_0710000	conserved Plasmodium protein, unknown function	0.003008	-0.046357	-0.028465	0.070951	0.006263
Pf3D7_07_v3	459807	461686	Pf3D7_07_v3	PF3D7_0710100	conserved protein, unknown function	0.046528	-0.07181	-0.100972	-0.082005	-0.126415
Pf3D7_07_v3	462855	472087	Pf3D7_07_v3	PF3D7_0710200	conserved Plasmodium protein, unknown function	-0.031046	-0.061115	-0.14343	-0.201118	-0.127436
Pf3D7_07_v3	472251	473791	Pf3D7_07_v3	PF3D7_0710300	conserved protein, unknown function	-0.05505	-0.055637	-0.04219	-0.061473	-0.102274
Pf3D7_07_v3	474373	475918	Pf3D7_07_v3	PF3D7_0710400	DNA repair protein RAD14, putative	-0.178842	-0.118167	-0.087136	-0.23188	-0.002721
Pf3D7_07_v3	475919	477802	Pf3D7_07_v3	PF3D7_0710500	conserved protein, unknown function	0.003269	-0.138106	-0.095082	-0.226572	-0.144074
Pf3D7_07_v3	478218	479388	Pf3D7_07_v3	PF3D7_0710600	60S ribosomal protein L34	0.266683	0.064574	0.073461	0.143161	0.081915
Pf3D7_07_v3	482451	484081	Pf3D7_07_v3	PF3D7_0710800	protein transport protein USE1, putative	-0.021402	-0.026848	-0.034805	-0.135949	-0.087316
Pf3D7_07_v3	484588	486287	Pf3D7_07_v3	PF3D7_0710900	50S ribosomal protein L1, mitochondrial, putative	-0.06364	-0.029834	-0.027458	-0.25648	-0.115366
Pf3D7_07_v3	487031	491220	Pf3D7_07_v3	PF3D7_0711000	AAA family ATPase, CDC48 subfamily	0.015903	-0.069643	-0.017629	-0.20565	-0.124993
Pf3D7_07_v3	492269	493482	Pf3D7_07_v3	PF3D7_0711100	conserved protein, unknown function	0.026832	0.013873	-0.00622	-0.099599	-0.037986
Pf3D7_07_v3	494988	498490	Pf3D7_07_v3	PF3D7_0711200	conserved Plasmodium protein, unknown function	-0.211508	-0.190876	-0.144453	-0.378609	-0.29846
Pf3D7_07_v3	499086	499945	Pf3D7_07_v3	PF3D7_0711300	conserved Plasmodium protein, unknown function	-0.039704	-0.118776	-0.08457	-0.086805	-0.100694
Pf3D7_07_v3	500158	502844	Pf3D7_07_v3	PF3D7_0711400	histone deacetylase complex subunit SAP18, putative	-0.177705	-0.101143	-0.102986	-0.458516	-0.245624
Pf3D7_07_v3	504995	507561	Pf3D7_07_v3	PF3D7_0711500	regulator of chromosome condensation, putative	0.043356	-0.0362	-0.049717	0.097267	-0.02048
Pf3D7_07_v3	511700	519675	Pf3D7_07_v3	PF3D7_0711700	erythrocyte membrane protein 1, PfEMP1	0.051272	0.013313	0.073149	0.001979	-0.044525
Pf3D7_07_v3	527088	535381	Pf3D7_07_v3	PF3D7_0712000	erythrocyte membrane protein 1, PfEMP1	0.093979	0.028325	0.023911	0.142075	0.136552
Pf3D7_07_v3	542656	550770	Pf3D7_07_v3	PF3D7_0712300	erythrocyte membrane protein 1, PfEMP1	0.005627	-0.147975	-0.178636	0.095489	-0.102171
Pf3D7_07_v3	551908	559328	Pf3D7_07_v3	PF3D7_0712400	erythrocyte membrane protein 1, PfEMP1	0.052783	-0.00061	-0.008783	0.18548	0.178148
Pf3D7_07_v3	562656	564410	Pf3D7_07_v3	PF3D7_0712500	rifin, pseudogene	-0.140148	-0.159959	-0.123602	0.154191	0.105923
Pf3D7_07_v3	566476	574558	Pf3D7_07_v3	PF3D7_0712600	erythrocyte membrane protein 1, PfEMP1	0.103847	0.005219	0.044024	0.239896	0.247235
Pf3D7_07_v3	581136	589173	Pf3D7_07_v3	PF3D7_0712800	erythrocyte membrane protein 1, PfEMP1	0.016089	-0.036728	-0.041073	0.079861	0.098235
Pf3D7_07_v3	590076	597983	Pf3D7_07_v3	PF3D7_0712900	erythrocyte membrane protein 1, PfEMP1	-0.154138	-0.113811	-0.093178	-0.119923	-0.020293
Pf3D7_07_v3	601891	603631	Pf3D7_07_v3	PF3D7_0713000	rifin	0.074763	0.056588	0.032617	0.150008	0.388753
Pf3D7_07_v3	605403	606690	Pf3D7_07_v3	PF3D7_0713100	Pfmc-2TM Maurer's cleft two transmembrane protein	0.049136	0.0465	0.0332	0.092091	0.981135
Pf3D7_07_v3	606861	608035	Pf3D7_07_v3	PF3D7_0713200	exported protein family 1	0.153498	0.069824	0.027029	0.194613	0.898442
Pf3D7_07_v3	609047	610772	Pf3D7_07_v3	PF3D7_0713300	erythrocyte membrane protein 1 (PfEMP1), pseudogene	-0.110933	-0.024179	-0.066295	-0.050099	0.000406
Pf3D7_07_v3	612208	613990	Pf3D7_07_v3	PF3D7_0713400	GPCR-like receptor SR25	-0.077956	-0.024614	0.041645	0.031373	-0.015778
Pf3D7_07_v3	614135	617499	Pf3D7_07_v3	PF3D7_0713500	conserved Plasmodium protein, unknown function	-0.063239	-0.046648	-0.007159	0.021362	0.006497
Pf3D7_07_v3	617683	621117	Pf3D7_07_v3	PF3D7_0713600	mitochondrial ribosomal protein S5 precursor, putative	-0.049418	-0.061435	-0.013031	0.112005	0.048929
Pf3D7_07_v3	621213	623771	Pf3D7_07_v3	PF3D7_0713700	conserved Plasmodium protein, unknown function	-0.07149	-0.022373	0.0051	-0.161802	-0.082007
Pf3D7_07_v3	624129	625550	Pf3D7_07_v3	PF3D7_0713800	negative elongation factor A, putative	0.008188	-0.01852	0.010545	-0.064331	-0.01092
Pf3D7_07_v3	626817	638026	Pf3D7_07_v3	PF3D7_0713900	conserved Plasmodium protein, unknown function	-0.001457	0.016286	0.03029	-0.041036	-0.011094
Pf3D7_07_v3	642851	643722	Pf3D7_07_v3	PF3D7_0714000	histone H2B variant	0.013671	-0.009398	-0.048868	-0.106816	-0.054747
Pf3D7_07_v3	646469	649017	Pf3D7_07_v3	PF3D7_0714100	MAATS1 domain-containing protein, putative	-0.02073	-0.022241	-0.059877	0.010194	-0.037774
Pf3D7_07_v3	650584	655169	Pf3D7_07_v3	PF3D7_0714200	conserved Plasmodium protein, unknown function	0.001139	-0.041676	-0.031847	-0.101194	-0.068725
Pf3D7_07_v3	656621	661919	Pf3D7_07_v3	PF3D7_0714300	palmitoyltransferase DHHC4, putative	0.077985	0.055972	0.047857	0.059814	-0.033328
Pf3D7_07_v3	662034	663657	Pf3D7_07_v3	PF3D7_0714400	calmodulin, putative	0.06755	-0.051478	-0.121379	-0.100604	-0.018497
Pf3D7_07_v3	664706	666417	Pf3D7_07_v3	PF3D7_0714500	transcription elongation factor s-II, putative	0.05669	-0.070915	0.016314	-0.122273	-0.107915
Pf3D7_07_v3	667735	669962	Pf3D7_07_v3	PF3D7_0714600	conserved protein, unknown function	-0.074077	-0.047153	-0.080835	-0.059662	-0.061117
Pf3D7_07_v3	673201	674514	Pf3D7_07_v3	PF3D7_0715000	4-nitrophenylphosphatase	-0.015999	-0.049156	-0.085793	-0.166934	-0.119087
Pf3D7_07_v3	674515	675380	Pf3D7_07_v3	PF3D7_0715100	C-Myc-binding protein, putative	0.121325	0.009137	-7.8e-05	-0.018623	0.000647
Pf3D7_07_v3	675811	682931	Pf3D7_07_v3	PF3D7_0715200	conserved Plasmodium protein, unknown function	0.075304	-0.051056	0.030265	0.190496	-0.020096
Pf3D7_07_v3	684289	686941	Pf3D7_07_v3	PF3D7_0715300	calcium/calmodulin-dependent protein kinase, putative	0.133134	0.009551	0.02808	-0.036361	-0.018705
Pf3D7_07_v3	687641	689098	Pf3D7_07_v3	PF3D7_0715400	secreted ookinete protein, putative	0.010165	0.023717	0.056783	-0.046159	0.011823
Pf3D7_07_v3	689293	690307	Pf3D7_07_v3	PF3D7_0715500	ATP synthase subunit epsilon, mitochondrial, putative	0.061293	-0.009578	-0.014034	0.023678	-0.008712
Pf3D7_07_v3	690818	693582	Pf3D7_07_v3	PF3D7_0715600	GTP-binding translation elongation factor tu family protein, putative	-0.000277	-0.043782	-0.041742	-0.088229	-0.112131
Pf3D7_07_v3	694273	695132	Pf3D7_07_v3	PF3D7_0715700	conserved protein, unknown function	0.02398	0.065208	0.0558	0.270899	0.101845
Pf3D7_07_v3	695350	697154	Pf3D7_07_v3	PF3D7_0715800	drug/metabolite transporter DMT1, putative	0.017628	0.003072	0.052377	0.345683	0.222084
Pf3D7_07_v3	698989	701159	Pf3D7_07_v3	PF3D7_0715900	cation diffusion facilitator family protein, putative	0.052166	0.007964	0.005963	0.004764	0.024247
Pf3D7_07_v3	702957	706834	Pf3D7_07_v3	PF3D7_0716000	RNA-binding protein, putative	0.104596	-0.032056	0.051532	0.177338	0.0757
Pf3D7_07_v3	707449	711158	Pf3D7_07_v3	PF3D7_0716100	protein SDA1, putative	-0.038537	-0.040276	0.001055	0.108116	0.013673
Pf3D7_07_v3	712219	715217	Pf3D7_07_v3	PF3D7_0716200	PDCD2 domain-containing protein, putative	0.080185	0.009157	-0.047335	-0.032771	-0.015164
Pf3D7_07_v3	717031	719218	Pf3D7_07_v3	PF3D7_0716300	conserved protein, unknown function	0.017436	-0.038876	-0.074054	0.011747	-0.044746
Pf3D7_07_v3	719760	721592	Pf3D7_07_v3	PF3D7_0716400	transcription initiation factor IIA subunit 1, putative	0.012787	-0.069475	-0.075769	-0.014374	-0.105124
Pf3D7_07_v3	721593	724965	Pf3D7_07_v3	PF3D7_0716500	conserved Plasmodium protein, unknown function	0.005143	0.051365	-0.007695	0.095811	-0.024287
Pf3D7_07_v3	725046	727469	Pf3D7_07_v3	PF3D7_0716600	cysteine desulfurase	-0.006973	-0.011679	-0.07306	-0.11054	-0.106218
Pf3D7_07_v3	727859	731376	Pf3D7_07_v3	PF3D7_0716700	conserved Plasmodium protein, unknown function	0.054882	0.062234	0.075115	0.316927	0.063688
Pf3D7_07_v3	731820	733746	Pf3D7_07_v3	PF3D7_0716800	eukaryotic translation initiation factor 3 subunit I, putative	0.006245	0.044067	-0.033355	0.005084	-0.054715
Pf3D7_07_v3	736120	737588	Pf3D7_07_v3	PF3D7_0716900	drug/metabolite transporter DMT2	-0.018151	0.050999	0.076343	-0.10638	-0.12905
Pf3D7_07_v3	738328	741459	Pf3D7_07_v3	PF3D7_0717000	conserved Plasmodium membrane protein, unknown function	0.0319	0.032609	0.010342	0.071107	0.013058
Pf3D7_07_v3	741760	745046	Pf3D7_07_v3	PF3D7_0717100	conserved Plasmodium protein, unknown function	-0.027223	0.022047	-0.062847	0.116263	0.025534
Pf3D7_07_v3	745047	746913	Pf3D7_07_v3	PF3D7_0717200	conserved Plasmodium protein, unknown function	-0.109991	0.000911	-0.001497	0.071802	-0.077903
Pf3D7_07_v3	748740	750949	Pf3D7_07_v3	PF3D7_0717300	transcription initiation factor IIE subunit alpha, putative	0.018041	-0.029286	0.045665	0.042562	0.024481
Pf3D7_07_v3	751627	754382	Pf3D7_07_v3	PF3D7_0717400	queuine tRNA-ribosyltransferase, putative	-0.001116	-0.032096	0.012806	-0.141996	-0.034976
Pf3D7_07_v3	755513	757946	Pf3D7_07_v3	PF3D7_0717500	calcium-dependent protein kinase 4	0.063473	-0.060076	-0.042931	0.223453	0.007351
Pf3D7_07_v3	758470	763127	Pf3D7_07_v3	PF3D7_0717600	conserved Plasmodium protein, unknown function	0.161478	-0.041819	-0.008417	0.075284	0.081331
Pf3D7_07_v3	764544	766663	Pf3D7_07_v3	PF3D7_0717700	serine--tRNA ligase, putative	0.104294	-0.020223	0.037012	0.162368	0.086411
Pf3D7_07_v3	767107	772199	Pf3D7_07_v3	PF3D7_0717800	conserved Plasmodium protein, unknown function	0.0263	-0.002855	0.00832	0.133738	0.025443
Pf3D7_07_v3	772701	775514	Pf3D7_07_v3	PF3D7_0717900	thioredoxin-like protein	0.046937	0.004269	0.029454	0.138736	0.086524
Pf3D7_07_v3	775891	795887	Pf3D7_07_v3	PF3D7_0718000	dynein heavy chain, putative	0.067529	0.089713	0.129726	0.223033	0.133448
Pf3D7_07_v3	796264	804989	Pf3D7_07_v3	PF3D7_0718100	exported serine/threonine protein kinase	0.037932	0.050061	0.062698	0.167456	0.136162
Pf3D7_07_v3	812051	820885	Pf3D7_07_v3	PF3D7_0718300	cysteine repeat modular protein 2	0.049589	0.038887	0.085238	-0.102159	-0.012857
Pf3D7_07_v3	822188	823265	Pf3D7_07_v3	PF3D7_0718400	mitochondrial ribosomal protein S8 precursor, putative	0.008067	0.01142	0.042572	0.036004	0.043146
Pf3D7_07_v3	824195	826134	Pf3D7_07_v3	PF3D7_0718500	prefoldin subunit 3, putative	0.012315	0.037179	0.036393	0.180962	0.159187
Pf3D7_07_v3	826587	831427	Pf3D7_07_v3	PF3D7_0718600	conserved Plasmodium protein, unknown function	0.019268	0.061068	0.040977	0.133653	0.092059
Pf3D7_07_v3	831428	833172	Pf3D7_07_v3	PF3D7_0718700	conserved Plasmodium membrane protein, unknown function	0.134504	0.142292	0.101697	8e-05	0.051699
Pf3D7_07_v3	833380	835301	Pf3D7_07_v3	PF3D7_0718800	conserved protein, unknown function	-0.005211	0.053763	0.046803	0.023128	0.133478
Pf3D7_07_v3	835707	837111	Pf3D7_07_v3	PF3D7_0718900	conserved Plasmodium protein, unknown function	0.025563	0.051844	0.039714	-0.089558	0.050815
Pf3D7_07_v3	837885	838793	Pf3D7_07_v3	PF3D7_0719000	conserved protein, unknown function	0.013984	0.065779	0.102754	0.041345	0.100962
Pf3D7_07_v3	838794	840274	Pf3D7_07_v3	PF3D7_0719100	ATP synthase F0 subunit a-like protein, putative	0.08686	0.067368	-0.037679	0.131713	0.114731
Pf3D7_07_v3	840858	843080	Pf3D7_07_v3	PF3D7_0719200	NIMA related kinase 4	0.009071	-0.008797	0.079577	-0.220647	-0.051559
Pf3D7_07_v3	844245	847843	Pf3D7_07_v3	PF3D7_0719300	actin-related protein, putative	-0.006954	-0.03542	0.048212	-0.022908	-0.091109
Pf3D7_07_v3	848148	853843	Pf3D7_07_v3	PF3D7_0719400	conserved Plasmodium protein, unknown function	0.107088	0.067337	0.038647	0.119908	0.074248
Pf3D7_07_v3	854402	856904	Pf3D7_07_v3	PF3D7_0719500	LEM3/CDC50 family protein, putative	0.068135	0.094903	0.053365	0.162386	0.062953
Pf3D7_07_v3	858492	859742	Pf3D7_07_v3	PF3D7_0719600	60S ribosomal protein L11a, putative	0.007382	0.010583	0.001562	0.102471	0.028707
Pf3D7_07_v3	861333	862737	Pf3D7_07_v3	PF3D7_0719700	40S ribosomal protein S10, putative	0.044073	0.007643	-0.073816	0.13325	-0.024743
Pf3D7_07_v3	863202	865063	Pf3D7_07_v3	PF3D7_0719800	conserved protein, unknown function	-0.079286	-0.000552	-0.057454	0.168865	0.104599
Pf3D7_07_v3	865677	876382	Pf3D7_07_v3	PF3D7_0719900	conserved Plasmodium membrane protein, unknown function	0.108065	0.098887	0.139495	0.294676	0.125485
Pf3D7_07_v3	876545	877682	Pf3D7_07_v3	PF3D7_0720000	exosome complex component CSL4, putative	0.038143	0.058644	0.108055	0.190808	0.173652
Pf3D7_07_v3	877683	878882	Pf3D7_07_v3	PF3D7_0720100	pre-rRNA-processing protein ESF2, putative	0.001272	0.017324	0.029405	0.145704	0.096442
Pf3D7_07_v3	879204	880196	Pf3D7_07_v3	PF3D7_0720200	conserved protein, unknown function	-0.04016	0.071375	0.059426	0.292328	0.164937
Pf3D7_07_v3	880215	881113	Pf3D7_07_v3	PF3D7_0720300	conserved Plasmodium protein, unknown function	0.023478	0.006558	0.037635	-0.067368	-0.047116
Pf3D7_07_v3	882686	885238	Pf3D7_07_v3	PF3D7_0720400	apoptosis-inducing factor, putative	0.050746	0.01022	0.114922	0.102947	0.1952
Pf3D7_07_v3	886096	887651	Pf3D7_07_v3	PF3D7_0720500	conserved Plasmodium protein, unknown function	-0.028937	0.032315	0.059196	0.166588	0.018143
Pf3D7_07_v3	887652	889628	Pf3D7_07_v3	PF3D7_0720600	conserved protein, unknown function	0.113301	0.097128	0.121294	0.110396	0.105985
Pf3D7_07_v3	891433	899301	Pf3D7_07_v3	PF3D7_0720700	phosphoinositide-binding protein, putative	0.116934	0.116249	0.155148	0.236302	0.169315
Pf3D7_07_v3	899501	901343	Pf3D7_07_v3	PF3D7_0720800	Ham1-like protein, putative	-0.029861	-0.040375	-0.000848	0.051083	-0.007319
Pf3D7_07_v3	901344	903037	Pf3D7_07_v3	PF3D7_0720900	tetratricopeptide repeat protein, putative	0.199945	0.08942	0.173664	-0.024614	-0.018426
Pf3D7_07_v3	903893	914921	Pf3D7_07_v3	PF3D7_0721000	conserved Plasmodium membrane protein, unknown function	0.057567	0.021008	0.06392	0.326151	0.240836
Pf3D7_07_v3	916184	917418	Pf3D7_07_v3	PF3D7_0721100	conserved protein, unknown function	-0.020724	0.008935	0.039354	0.045354	0.025206
Pf3D7_07_v3	917708	921066	Pf3D7_07_v3	PF3D7_0721200	conserved Plasmodium protein, unknown function	-0.00882	-0.019162	0.025285	-0.203025	-0.117137
Pf3D7_07_v3	922035	925234	Pf3D7_07_v3	PF3D7_0721300	ATP-dependent RNA helicase DBP7, putative	-0.085467	0.008222	0.057247	-0.08178	-0.032243
Pf3D7_07_v3	926442	928271	Pf3D7_07_v3	PF3D7_0721400	rhoptry protein, putative	-0.041628	0.025754	0.068329	0.029921	0.024266
Pf3D7_07_v3	928272	931103	Pf3D7_07_v3	PF3D7_0721500	conserved Plasmodium membrane protein, unknown function	0.029866	0.023245	0.098212	0.026656	0.040991
Pf3D7_07_v3	931209	932414	Pf3D7_07_v3	PF3D7_0721600	40S ribosomal protein S5, putative	-0.092673	-0.039834	-0.016955	-0.118776	-0.150064
Pf3D7_07_v3	935247	937150	Pf3D7_07_v3	PF3D7_0721700	secreted ookinete protein, putative	-0.00506	0.011475	0.014151	0.061575	-0.0416
Pf3D7_07_v3	938029	939145	Pf3D7_07_v3	PF3D7_0721800	conserved Plasmodium protein, unknown function	-0.01453	-0.016209	0.036695	0.343919	0.155082
Pf3D7_07_v3	939465	940500	Pf3D7_07_v3	PF3D7_0721900	V-type ATPase V0 subunit e, putative	0.048981	0.0133	0.107728	-0.194186	0.034272
Pf3D7_07_v3	941526	942763	Pf3D7_07_v3	PF3D7_0722000	conserved Plasmodium protein, unknown function	-0.014593	0.021303	0.075079	-0.108328	-0.052708
Pf3D7_07_v3	943773	945484	Pf3D7_07_v3	PF3D7_0722100	protein pelota homolog, putative	0.054105	0.01975	-0.06744	-0.070193	-0.029179
Pf3D7_07_v3	946113	948862	Pf3D7_07_v3	PF3D7_0722200	rhoptry-associated leucine zipper-like protein 1	-0.133587	-0.031128	-0.047542	-0.089217	0.00138
Pf3D7_07_v3	949199	953364	Pf3D7_07_v3	PF3D7_0722300	ubiquitin carboxyl-terminal hydrolase, putative	0.068174	0.058842	0.051269	0.012803	0.046658
Pf3D7_07_v3	954534	956593	Pf3D7_07_v3	PF3D7_0722400	Obg-like ATPase 1, putative	0.030708	0.034134	0.009499	0.109442	0.09826
Pf3D7_07_v3	956670	958267	Pf3D7_07_v3	PF3D7_0722500	pre-mRNA-splicing factor CWC15, putative	-0.000306	0.006231	0.009777	-0.219211	-0.054854
Pf3D7_07_v3	958636	960944	Pf3D7_07_v3	PF3D7_0722600	U3 small nucleolar RNA-associated protein 7, putative	0.198752	0.163204	0.065512	0.128214	0.112839
Pf3D7_07_v3	961781	962697	Pf3D7_07_v3	PF3D7_0722700	conserved protein, unknown function	-0.000599	0.005368	-0.019068	0.051676	0.000101
Pf3D7_07_v3	963120	965359	Pf3D7_07_v3	PF3D7_0722800	conserved protein, unknown function	0.101818	0.139894	0.126688	-0.020422	0.046681
Pf3D7_07_v3	965414	968032	Pf3D7_07_v3	PF3D7_0722900	conserved protein, unknown function	0.020467	-0.01013	0.042149	0.230106	0.101481
Pf3D7_07_v3	968586	969985	Pf3D7_07_v3	PF3D7_0723000	tRNAHis guanylyltransferase, putative	0.129249	0.003839	0.090828	0.019574	0.068877
Pf3D7_07_v3	970242	972127	Pf3D7_07_v3	PF3D7_0723100	protein CPH1, putative	-0.061031	0.03816	-0.039422	0.008848	-0.065826
Pf3D7_07_v3	972408	974522	Pf3D7_07_v3	PF3D7_0723200	conserved Plasmodium protein, unknown function	0.033428	0.003997	0.054409	-0.111052	-0.053145
Pf3D7_07_v3	975516	978658	Pf3D7_07_v3	PF3D7_0723300	conserved protein, unknown function	-0.027877	-0.02075	-0.034875	0.112346	0.075415
Pf3D7_07_v3	978670	983438	Pf3D7_07_v3	PF3D7_0723400	conserved Plasmodium protein, unknown function	0.087763	0.024481	0.029189	-0.132028	-0.000234
Pf3D7_07_v3	984528	985708	Pf3D7_07_v3	PF3D7_0723500	dynactin subunit 5, putative	-0.057219	0.008534	-0.025719	0.042587	0.013673
Pf3D7_07_v3	986348	987615	Pf3D7_07_v3	PF3D7_0723600	proteasome assembly chaperone 4, putative	-0.135064	-0.009132	-0.019057	0.257744	0.100888
Pf3D7_07_v3	987895	991493	Pf3D7_07_v3	PF3D7_0723700	metallo-hydrolase/oxidoreductase, putative	-0.079154	0.094865	0.063558	0.18106	0.222413
Pf3D7_07_v3	992982	1000467	Pf3D7_07_v3	PF3D7_0723800	conserved Plasmodium protein, unknown function	0.018118	-0.014696	0.03565	-0.091833	-0.021279
Pf3D7_07_v3	1000468	1004996	Pf3D7_07_v3	PF3D7_0723900	RNA-binding protein, putative	0.011927	-0.00327	0.00871	0.112375	0.061313
Pf3D7_07_v3	1006085	1012395	Pf3D7_07_v3	PF3D7_0724000	Rab GTPase activator and protein kinase, putative	-0.027879	0.002916	0.051586	0.075121	0.068225
Pf3D7_07_v3	1013045	1016699	Pf3D7_07_v3	PF3D7_0724100	conserved Plasmodium protein, unknown function	-0.037959	0.042401	0.019903	-0.011743	0.011865
Pf3D7_07_v3	1019134	1020917	Pf3D7_07_v3	PF3D7_0724200	type 2A phosphatase-associated protein 42, putative	0.006213	0.073101	0.043836	0.194382	0.134776
Pf3D7_07_v3	1021258	1022880	Pf3D7_07_v3	PF3D7_0724300	ubiquinone biosynthesis O-methyltransferase, putative	-0.068903	0.054387	-0.004514	0.024612	0.007749
Pf3D7_07_v3	1023401	1024371	Pf3D7_07_v3	PF3D7_0724400	mitochondrial import inner membrane translocase subunit TIM14, putative	0.008042	-0.003557	-0.030652	-0.102623	-0.079143
Pf3D7_07_v3	1024422	1026305	Pf3D7_07_v3	PF3D7_0724500	conserved Plasmodium protein, unknown function	0.189789	0.089824	0.168838	0.043292	0.181189
Pf3D7_07_v3	1026306	1033327	Pf3D7_07_v3	PF3D7_0724600	protein kinase, putative	-0.045129	0.028863	0.092004	0.204882	-0.015353
Pf3D7_07_v3	1034719	1046359	Pf3D7_07_v3	PF3D7_0724700	conserved Plasmodium protein, unknown function	-0.053639	0.035684	0.054168	0.006699	0.052578
Pf3D7_07_v3	1047177	1049612	Pf3D7_07_v3	PF3D7_0724800	kelch domain-containing protein, putative	-0.039858	0.038524	0.006468	0.071633	0.054344
Pf3D7_07_v3	1052215	1058408	Pf3D7_07_v3	PF3D7_0724900	kinesin-19, putative	-0.124396	-0.055627	-0.006603	0.019839	-0.032735
Pf3D7_07_v3	1058683	1063226	Pf3D7_07_v3	PF3D7_0725000	exonuclease I, putative	-0.000313	0.044309	0.097216	0.119229	0.081027
Pf3D7_07_v3	1065002	1070490	Pf3D7_07_v3	PF3D7_0725100	conserved Plasmodium membrane protein, unknown function	-0.072803	-0.01652	-0.000562	0.046206	0.001109
Pf3D7_07_v3	1070730	1071969	Pf3D7_07_v3	PF3D7_0725200	mago nashi protein homologue, putative	-0.040165	0.003575	-0.026867	0.064303	-0.007395
Pf3D7_07_v3	1071970	1075004	Pf3D7_07_v3	PF3D7_0725300	conserved protein, unknown function	-0.016169	0.056709	0.078138	0.018324	0.011625
Pf3D7_07_v3	1078765	1080305	Pf3D7_07_v3	PF3D7_0725400	conserved Plasmodium protein, unknown function	-0.02292	0.083841	0.020115	-0.115406	-0.04388
Pf3D7_07_v3	1080392	1082593	NA	FALSE	NA	-0.191405	-0.096905	-0.073841	-0.275599	-0.197945
Pf3D7_07_v3	1083511	1085847	Pf3D7_07_v3	PF3D7_0725600	18S ribosomal RNA	-0.210193	-0.145279	-0.12037	-0.150427	-0.181251
Pf3D7_07_v3	1086570	1090607	Pf3D7_07_v3	PF3D7_0726000	28S ribosomal RNA	-0.395016	-0.046245	0.011057	-0.016666	-0.156679
Pf3D7_07_v3	1093316	1096372	Pf3D7_07_v3	PF3D7_0726100	Plasmodium exported protein, unknown function	-0.122926	0.085621	0.077817	-0.040862	0.027937
Pf3D7_07_v3	1099884	1103217	Pf3D7_07_v3	PF3D7_0726200	serine/threonine protein kinase, FIKK family	0.010262	0.051543	-0.006434	0.078504	0.048057
Pf3D7_07_v3	1103906	1108597	Pf3D7_07_v3	PF3D7_0726300	DNA mismatch repair protein PMS1, putative	0.010695	-0.013412	-0.014599	0.07775	0.056039
Pf3D7_07_v3	1108598	1124742	Pf3D7_07_v3	PF3D7_0726400	conserved Plasmodium membrane protein, unknown function	-0.046896	-0.014851	0.008848	-0.07696	-0.036891
Pf3D7_07_v3	1126306	1136827	Pf3D7_07_v3	PF3D7_0726500	ubiquitin carboxyl-terminal hydrolase, putative	-0.0192	0.005881	0.023141	0.105494	0.043801
Pf3D7_07_v3	1140229	1143004	Pf3D7_07_v3	PF3D7_0726600	conserved Plasmodium protein, unknown function	-0.058637	-0.064399	-0.010412	-0.048865	-0.059706
Pf3D7_07_v3	1145398	1147388	Pf3D7_07_v3	PF3D7_0726900	mitochondrial import inner membrane translocase subunit TIM50, putative	-0.056574	0.054036	-0.124149	-0.06822	-0.125947
Pf3D7_07_v3	1147389	1151308	Pf3D7_07_v3	PF3D7_0727000	vacuolar protein sorting-associated protein 53, putative	-0.024013	-0.035053	0.008487	-0.029923	-0.029577
Pf3D7_07_v3	1151905	1155605	Pf3D7_07_v3	PF3D7_0727100	conserved protein, unknown function	-0.062066	-0.010561	-0.063166	-0.219315	-0.12181
Pf3D7_07_v3	1156498	1158659	Pf3D7_07_v3	PF3D7_0727200	cysteine desulfurase, putative	0.019144	-0.011911	-0.03751	-0.135163	-0.094022
Pf3D7_07_v3	1159450	1162070	Pf3D7_07_v3	PF3D7_0727300	DNA (cytosine-5)-methyltransferase	-0.029836	-0.056585	-0.037145	-0.033578	-0.044637
Pf3D7_07_v3	1162460	1164081	Pf3D7_07_v3	PF3D7_0727400	proteasome subunit alpha type-5, putative	-0.054605	-0.070339	-0.049098	-0.199558	-0.045418
Pf3D7_07_v3	1164205	1166828	Pf3D7_07_v3	PF3D7_0727500	mTERF domain-containing protein, putative	0.032885	-0.036968	-0.085151	0.019152	-0.016964
Pf3D7_07_v3	1167191	1171051	Pf3D7_07_v3	PF3D7_0727600	conserved Plasmodium protein, unknown function	-0.052238	-0.04987	-0.015489	-0.020171	0.008239
Pf3D7_07_v3	1171052	1174406	Pf3D7_07_v3	PF3D7_0727700	conserved Plasmodium protein, unknown function	-0.050717	-0.072888	-0.034563	-0.028269	-0.05884
Pf3D7_07_v3	1175694	1181950	Pf3D7_07_v3	PF3D7_0727800	cation transporting ATPase, putative	-0.04129	-0.089861	-0.123623	0.084307	-0.019942
Pf3D7_07_v3	1184151	1190422	Pf3D7_07_v3	PF3D7_0727900	conserved Plasmodium protein, unknown function	-0.066484	-0.095357	-0.140228	-0.144513	-0.125339
Pf3D7_07_v3	1190929	1192539	Pf3D7_07_v3	PF3D7_0728000	eukaryotic translation initiation factor 2 subunit alpha	-0.104569	-0.075663	-0.08842	-0.048615	-0.036258
Pf3D7_07_v3	1193366	1210551	Pf3D7_07_v3	PF3D7_0728100	conserved Plasmodium membrane protein, unknown function	-0.055559	-0.048165	-0.043897	-0.018478	-0.033267
Pf3D7_07_v3	1211407	1213679	Pf3D7_07_v3	PF3D7_0728200	actin-like protein, putative	-0.182554	-0.137859	-0.071773	0.066393	-0.036937
Pf3D7_07_v3	1213680	1214726	Pf3D7_07_v3	PF3D7_0728300	conserved protein, unknown function	-0.046723	0.034243	0.021322	0.056119	0.016565
Pf3D7_07_v3	1215926	1217451	Pf3D7_07_v3	PF3D7_0728500	conserved Plasmodium protein, unknown function	0.195501	-0.057995	0.101313	0.222324	0.126796
Pf3D7_07_v3	1218176	1225723	Pf3D7_07_v3	PF3D7_0728600	RING zinc finger protein, putative	-0.036428	-0.106457	-0.10236	0.143149	0.0442
Pf3D7_07_v3	1225779	1228964	Pf3D7_07_v3	PF3D7_0728700	alpha/beta hydrolase, putative	0.030904	-0.044643	-0.025857	0.166019	0.097609
Pf3D7_07_v3	1230339	1232226	Pf3D7_07_v3	PF3D7_0728800	conserved Plasmodium protein, unknown function	-0.050944	-0.137811	-0.117018	-0.052034	-0.068076
Pf3D7_07_v3	1232227	1234922	Pf3D7_07_v3	PF3D7_0728900	RNA-binding protein, putative	-0.018737	-0.033931	-0.057462	-0.04563	-0.050029
Pf3D7_07_v3	1235449	1236957	Pf3D7_07_v3	PF3D7_0729000	signal recognition particle subunit SRP9	0.064666	-0.022959	0.025792	0.158026	-0.00159
Pf3D7_07_v3	1238196	1246438	Pf3D7_07_v3	PF3D7_0729100	conserved Plasmodium protein, unknown function	-0.010325	-0.040339	-0.041109	0.015537	-0.002289
Pf3D7_07_v3	1247148	1248514	Pf3D7_07_v3	PF3D7_0729200	1-cys peroxiredoxin	-0.124424	-0.108959	-0.036158	-0.083864	-0.126533
Pf3D7_07_v3	1248587	1251753	Pf3D7_07_v3	PF3D7_0729300	60S ribosomal export protein NMD3, putative	-0.140765	0.034681	0.02945	0.015042	-0.012063
Pf3D7_07_v3	1252597	1254347	Pf3D7_07_v3	PF3D7_0729400	ribosome biogenesis protein BRX1, putative	-0.211837	-0.074816	-0.085621	-0.119234	-0.161815
Pf3D7_07_v3	1255121	1257903	Pf3D7_07_v3	PF3D7_0729500	mRNA (N6-adenosine)-methyltransferase, putative	0.034932	0.000327	-0.022274	0.170349	0.066578
Pf3D7_07_v3	1258537	1259942	Pf3D7_07_v3	PF3D7_0729600	conserved Plasmodium protein, unknown function	-0.006838	-0.082038	-0.029279	0.187603	0.082234
Pf3D7_07_v3	1259943	1263030	Pf3D7_07_v3	PF3D7_0729700	conserved protein, unknown function	-0.120055	-0.11285	-0.040687	0.022288	-0.016256
Pf3D7_07_v3	1265660	1281566	Pf3D7_07_v3	PF3D7_0729900	dynein heavy chain, putative	0.073196	0.023769	0.055538	0.217418	0.152375
Pf3D7_07_v3	1282663	1285769	Pf3D7_07_v3	PF3D7_0730100	tRNA pseudouridine synthase D, putative	-0.092267	-0.056981	0.012868	-0.116661	-0.111238
Pf3D7_07_v3	1285807	1289649	Pf3D7_07_v3	PF3D7_0730200	AP-4 complex subunit beta, putative	-0.088642	-0.032484	-0.06272	-0.122827	-0.035989
Pf3D7_07_v3	1297209	1301704	Pf3D7_07_v3	PF3D7_0730300	AP2 domain transcription factor AP2-L, putative	0.029138	-0.035384	-0.033996	0.075057	0.001422
Pf3D7_07_v3	1304097	1305346	Pf3D7_07_v3	PF3D7_0730400	IMP1-like protein, putative	0.089712	0.125364	0.043277	-0.128141	-0.046655
Pf3D7_07_v3	1305644	1314465	Pf3D7_07_v3	PF3D7_0730500	conserved Plasmodium protein, unknown function	-0.12143	-0.052739	-0.076718	0.053641	-0.004799
Pf3D7_07_v3	1321056	1322617	Pf3D7_07_v3	PF3D7_0730800	Plasmodium exported protein, unknown function, unspecified product	-0.22906	-0.202432	-0.162807	0.076721	-0.060296
Pf3D7_07_v3	1325125	1332063	Pf3D7_07_v3	PF3D7_0730900	EMP1-trafficking protein	-0.129738	-0.114927	-0.050721	0.172342	0.075124
Pf3D7_07_v3	1332925	1335188	Pf3D7_07_v3	PF3D7_0731000	unspecified product	-0.190767	-0.152773	-0.055203	-0.019095	-0.12795
Pf3D7_07_v3	1338709	1342040	Pf3D7_07_v3	PF3D7_0731100	EMP1-trafficking protein	-0.052818	-0.016781	-0.043279	0.141633	0.047342
Pf3D7_07_v3	1342592	1344246	Pf3D7_07_v3	PF3D7_0731200	Plasmodium exported protein, unknown function	-0.119192	0.017685	0.017777	0.15113	-0.010862
Pf3D7_07_v3	1349782	1351399	Pf3D7_07_v3	PF3D7_0731300	Plasmodium exported protein (PHISTb), unknown function	-0.251353	-0.134012	-0.108713	0.143146	-0.022581
Pf3D7_07_v3	1353508	1355732	Pf3D7_07_v3	PF3D7_0731400	serine/threonine protein kinase, FIKK family, pseudogene	0.013318	0.060741	0.013509	0.206381	0.015984
Pf3D7_07_v3	1357805	1363179	Pf3D7_07_v3	PF3D7_0731500	erythrocyte binding antigen-175	-0.017464	-0.041947	-0.01264	0.233943	0.110426
Pf3D7_07_v3	1367911	1370846	Pf3D7_07_v3	PF3D7_0731600	acyl-CoA synthetase	-0.080725	-0.110235	-0.090406	0.099258	-0.068766
Pf3D7_07_v3	1371813	1373010	Pf3D7_07_v3	PF3D7_0731700	Plasmodium exported protein (hyp9), unknown function	-0.026563	-0.050313	0.011215	0.07163	0.006875
Pf3D7_07_v3	1378368	1381019	Pf3D7_07_v3	PF3D7_0731800	alpha/beta hydrolase, putative	-0.09045	-0.084724	-0.025182	0.163785	0.104568
Pf3D7_07_v3	1382160	1383774	Pf3D7_07_v3	PF3D7_0731900	rifin, pseudogene	-0.083454	-0.113103	-0.114533	-0.116366	-0.069231
Pf3D7_07_v3	1385385	1386876	Pf3D7_07_v3	PF3D7_0732000	stevor	-0.212706	-0.15248	-0.228511	-0.130479	-0.159767
Pf3D7_07_v3	1390461	1392293	Pf3D7_07_v3	PF3D7_0732200	rifin	-0.048658	0.051607	-0.083375	0.354028	0.172856
Pf3D7_07_v3	1402373	1404228	Pf3D7_07_v3	PF3D7_0732500	rifin	-0.049888	-0.035687	-0.112902	0.10612	-0.059608
Pf3D7_07_v3	1410206	1412481	Pf3D7_07_v3	PF3D7_0732800	erythrocyte membrane protein 1 (PfEMP1), exon 2	-0.124011	-0.127722	-0.017717	0.289832	0.108496
Pf3D7_07_v3	1414184	1415933	Pf3D7_07_v3	PF3D7_0732900	rifin	-0.138606	-0.018205	-0.023275	0.202743	0.099924
Pf3D7_07_v3	1417338	1426484	Pf3D7_07_v3	PF3D7_0733000	erythrocyte membrane protein 1, PfEMP1	-0.141729	-0.093095	-0.076775	0.11617	0.038948
Pf3D7_08_v3	21111	28903	Pf3D7_08_v3	PF3D7_0800100	erythrocyte membrane protein 1, PfEMP1	-0.063214	-0.033528	-0.062067	0.13394	0.112614
Pf3D7_08_v3	29450	39283	Pf3D7_08_v3	PF3D7_0800200	erythrocyte membrane protein 1, PfEMP1	-0.232876	-0.173055	-0.143907	0.428273	0.179947
Pf3D7_08_v3	40698	51189	Pf3D7_08_v3	PF3D7_0800300	erythrocyte membrane protein 1, PfEMP1	-0.185488	-0.08766	-0.040852	0.269689	0.016222
Pf3D7_08_v3	56102	57953	Pf3D7_08_v3	PF3D7_0800500	rifin	0.128572	0.080324	0.046591	0.456578	0.289275
Pf3D7_08_v3	65466	72035	Pf3D7_08_v3	PF3D7_0800700	surface-associated interspersed protein 8.3 (SURFIN 8.3)	0.000556	0.148835	0.082017	0.358266	0.27137
Pf3D7_08_v3	79573	80892	Pf3D7_08_v3	PF3D7_0800800	Plasmodium exported protein (hyp7), unknown function	-0.003655	0.052293	0.034224	0.270394	0.155024
Pf3D7_08_v3	82878	84154	Pf3D7_08_v3	PF3D7_0800900	Plasmodium exported protein (hyp7), unknown function, pseudogene	0.078112	0.060445	0.036815	0.306163	0.229309
Pf3D7_08_v3	84318	88672	Pf3D7_08_v3	PF3D7_0801000	Plasmodium exported protein (PHISTc), unknown function	-0.105322	0.075809	0.055258	0.042272	0.029173
Pf3D7_08_v3	91147	97821	Pf3D7_08_v3	PF3D7_0801100	28S ribosomal RNA	-0.168302	-0.051991	-0.096466	0.05155	-0.043145
Pf3D7_08_v3	98640	99301	Pf3D7_08_v3	PF3D7_0801200	5.8S ribosomal RNA	-0.041168	-0.020806	0.020201	0.066191	0.012581
Pf3D7_08_v3	101704	103076	Pf3D7_08_v3	PF3D7_0801300	von Willebrand factor A domain-related protein	-0.305117	-0.038598	-0.084201	-0.098304	-0.024825
Pf3D7_08_v3	104275	105138	Pf3D7_08_v3	PF3D7_0801400	conserved Plasmodium protein, unknown function	-0.225411	-0.112942	-0.096968	-0.099038	-0.105653
Pf3D7_08_v3	106343	108492	Pf3D7_08_v3	PF3D7_0801500	nucleolar protein 10, putative	-0.107811	-0.014749	-0.006347	0.075365	0.025706
Pf3D7_08_v3	108930	109807	Pf3D7_08_v3	PF3D7_0801600	conserved protein, unknown function	-0.103528	0.038986	0.021802	0.272911	0.164627
Pf3D7_08_v3	112049	118127	Pf3D7_08_v3	PF3D7_0801700	sentrin-specific protease 2, putative	0.044386	0.103946	0.176545	0.476691	0.181783
Pf3D7_08_v3	118782	122317	Pf3D7_08_v3	PF3D7_0801800	mannose-6-phosphate isomerase, putative	-0.044167	0.024713	0.053296	0.064519	0.050584
Pf3D7_08_v3	128599	143087	Pf3D7_08_v3	PF3D7_0801900	lysine-specific histone demethylase, putative	0.202245	0.145262	0.098066	0.184371	0.180947
Pf3D7_08_v3	145839	150532	Pf3D7_08_v3	PF3D7_0802000	glutamate dehydrogenase, putative	-0.092775	-0.083201	0.03138	0.207566	0.087016
Pf3D7_08_v3	151558	159918	Pf3D7_08_v3	PF3D7_0802100	AP2 domain transcription factor, putative	-0.203173	-0.038236	0.004344	0.150165	0.03849
Pf3D7_08_v3	165166	166328	Pf3D7_08_v3	PF3D7_0802200	1-cys peroxiredoxin	-0.194925	0.023288	0.035488	0.081341	0.031251
Pf3D7_08_v3	166819	170684	Pf3D7_08_v3	PF3D7_0802300	periodic tryptophan protein 2, putative	-0.134906	0.017555	-0.010216	0.121727	0.033294
Pf3D7_08_v3	171615	174516	Pf3D7_08_v3	PF3D7_0802400	conserved Plasmodium protein, unknown function	0.007546	0.047635	0.026293	0.236916	0.132781
Pf3D7_08_v3	174517	179156	Pf3D7_08_v3	PF3D7_0802500	inositol 5-phosphatase, putative	-0.075906	0.024763	0.009049	0.241245	0.133521
Pf3D7_08_v3	180313	188339	Pf3D7_08_v3	PF3D7_0802600	adenylyl cyclase beta	-0.003663	0.100218	0.094924	0.221028	0.151193
Pf3D7_08_v3	188340	190566	Pf3D7_08_v3	PF3D7_0802700	conserved Plasmodium protein, unknown function	-0.066559	0.030759	-0.000652	0.071146	0.104449
Pf3D7_08_v3	191726	194353	Pf3D7_08_v3	PF3D7_0802800	serine/threonine protein phosphatase 2B catalytic subunit A	-0.054677	0.036768	0.025384	-0.04303	-0.000776
Pf3D7_08_v3	194898	195928	Pf3D7_08_v3	PF3D7_0802900	conserved Plasmodium protein, unknown function	-0.006678	0.078124	0.063379	0.022733	0.010483
Pf3D7_08_v3	196331	198864	Pf3D7_08_v3	PF3D7_0803000	peptidyl-prolyl cis-trans isomerase	-0.065942	0.022794	0.035363	0.081761	0.060004
Pf3D7_08_v3	198931	203168	Pf3D7_08_v3	PF3D7_0803100	U3 small nucleolar RNA-associated protein 14, putative	-0.091742	-0.072	-0.069994	0.001297	-0.039419
Pf3D7_08_v3	203991	206911	Pf3D7_08_v3	PF3D7_0803200	filament assembling protein, putative	-0.068253	0.053402	0.072088	0.178008	0.139577
Pf3D7_08_v3	208201	210541	Pf3D7_08_v3	PF3D7_0803300	mitogen-activated protein kinase organizer 1, putative	-0.121589	-0.153515	-0.122376	-0.25861	-0.262875
Pf3D7_08_v3	212002	216221	Pf3D7_08_v3	PF3D7_0803400	DNA repair and recombination protein RAD54, putative	-0.077438	-0.059007	-0.035582	0.025829	0.050301
Pf3D7_08_v3	217638	222541	Pf3D7_08_v3	PF3D7_0803500	AAA family ATPase, putative	-0.124166	-0.054006	-0.065956	0.129818	-0.000139
Pf3D7_08_v3	223512	230459	Pf3D7_08_v3	PF3D7_0803600	conserved Plasmodium protein, unknown function	-0.10454	0.014653	-0.022674	0.405793	0.08783
Pf3D7_08_v3	231148	233006	Pf3D7_08_v3	PF3D7_0803700	tubulin gamma chain	0.094452	0.168146	0.113118	0.486198	0.260375
Pf3D7_08_v3	233217	234676	Pf3D7_08_v3	PF3D7_0803800	proteasome subunit beta type-4	-0.02093	0.008524	0.01775	0.175284	0.073556
Pf3D7_08_v3	237603	241298	Pf3D7_08_v3	PF3D7_0804000	cactin homolog, putative	-0.072757	-0.010497	-0.061664	0.13145	0.022288
Pf3D7_08_v3	241853	245025	Pf3D7_08_v3	PF3D7_0804300	zinc finger protein, putative	-0.058549	0.053732	0.036369	0.125058	0.092177
Pf3D7_08_v3	245461	248183	Pf3D7_08_v3	PF3D7_0804400	methionine aminopeptidase 1c, putative	-0.138604	0.072453	0.070156	0.253803	0.188786
Pf3D7_08_v3	249833	268646	Pf3D7_08_v3	PF3D7_0804500	conserved Plasmodium membrane protein, unknown function	-0.088641	0.042414	0.025405	0.267489	0.083548
Pf3D7_08_v3	268647	270946	Pf3D7_08_v3	PF3D7_0804600	tRNA pseudouridine synthase, putative	-0.138416	-0.016371	0.00556	0.161523	0.028212
Pf3D7_08_v3	271167	277663	Pf3D7_08_v3	PF3D7_0804700	conserved Plasmodium protein, unknown function	-0.040358	-0.078328	-0.040757	0.0405	0.027899
Pf3D7_08_v3	278131	279284	Pf3D7_08_v3	PF3D7_0804800	peptidyl-prolyl cis-trans isomerase	0.063714	0.099878	0.088352	0.266551	0.144584
Pf3D7_08_v3	279461	281436	Pf3D7_08_v3	PF3D7_0804900	GTPase-activating protein, putative	-0.030947	0.02633	0.03623	0.157291	0.106476
Pf3D7_08_v3	282816	284772	Pf3D7_08_v3	PF3D7_0805000	alpha/beta hydrolase, putative	-0.11302	-0.030518	0.044923	0.016054	-0.019487
Pf3D7_08_v3	286709	288870	Pf3D7_08_v3	PF3D7_0805100	conserved protein, unknown function	-0.071209	0.052784	0.039631	0.198561	0.044743
Pf3D7_08_v3	290652	291433	Pf3D7_08_v3	PF3D7_0805200	gamete release protein, putative	-0.171749	-0.000172	0.013762	-0.024694	0.019447
Pf3D7_08_v3	292863	297121	Pf3D7_08_v3	PF3D7_0805300	conserved Plasmodium protein, unknown function	-0.062856	0.004825	-0.003127	0.134171	0.020768
Pf3D7_08_v3	303120	304846	Pf3D7_08_v3	PF3D7_0805400	N-acetyltransferase, GNAT family, putative	-0.128186	-0.008446	0.114398	-0.127089	-0.042174
Pf3D7_08_v3	305045	308799	Pf3D7_08_v3	PF3D7_0805500	conserved Plasmodium protein, unknown function	0.025122	-0.003708	0.013619	0.049182	0.005357
Pf3D7_08_v3	311784	313210	Pf3D7_08_v3	PF3D7_0805600	PAP2-like protein, putative	0.159788	-0.024031	-0.02897	0.026832	-0.031382
Pf3D7_08_v3	313922	318976	Pf3D7_08_v3	PF3D7_0805700	serine/threonine protein kinase, FIKK family	-0.021139	-0.114927	-0.029996	0.052434	0.018742
Pf3D7_08_v3	322117	323927	Pf3D7_08_v3	PF3D7_0805800	conserved Plasmodium protein, unknown function	-0.016288	0.041632	0.008898	0.078858	-0.008467
Pf3D7_08_v3	324029	325905	Pf3D7_08_v3	PF3D7_0805900	conserved protein, unknown function	-0.045551	0.007201	-0.00958	-0.074276	-0.050493
Pf3D7_08_v3	325965	330254	Pf3D7_08_v3	PF3D7_0806000	AAA family ATPase, putative	-0.043826	0.016677	0.072079	-0.014163	0.060999
Pf3D7_08_v3	330401	332928	Pf3D7_08_v3	PF3D7_0806100	conserved Plasmodium protein, unknown function	-0.063563	0.052147	0.046761	-0.043529	0.023442
Pf3D7_08_v3	333129	337814	Pf3D7_08_v3	PF3D7_0806200	Dpy-19-like C-mannosyltransferase, putative	0.044429	0.077278	-0.011747	0.043228	0.060732
Pf3D7_08_v3	337815	343504	Pf3D7_08_v3	PF3D7_0806300	ferlin-like protein, putative	0.037773	-0.002044	0.07696	0.090147	0.158097
Pf3D7_08_v3	344038	345071	Pf3D7_08_v3	PF3D7_0806400	UDP-N-acetylglucosamine transferase subunit ALG13, putative	-0.070429	-0.056358	-0.010423	-0.047977	0.037884
Pf3D7_08_v3	345177	347704	Pf3D7_08_v3	PF3D7_0806500	DnaJ protein, putative	-0.037464	0.001615	0.093789	0.059875	0.05026
Pf3D7_08_v3	349067	353612	Pf3D7_08_v3	PF3D7_0806600	kinesin-like protein, putative	0.068708	0.084986	0.078177	0.217016	0.188557
Pf3D7_08_v3	354222	362646	Pf3D7_08_v3	PF3D7_0806700	conserved Plasmodium membrane protein, unknown function	0.016925	0.012356	0.023134	0.203676	0.165215
Pf3D7_08_v3	363010	366671	Pf3D7_08_v3	PF3D7_0806800	V-type proton ATPase subunit a, putative	0.025319	0.109625	-0.000369	0.210675	0.25162
Pf3D7_08_v3	368357	369996	Pf3D7_08_v3	PF3D7_0806900	conserved protein, unknown function	0.077211	0.052605	0.04846	0.180489	0.09576
Pf3D7_08_v3	370534	372762	Pf3D7_08_v3	PF3D7_0807000	YEATS domain-containing protein, putative	0.086101	0.088585	0.068696	0.162033	0.132064
Pf3D7_08_v3	372763	377117	Pf3D7_08_v3	PF3D7_0807100	DNA helicase PSH3	0.004723	-0.047565	0.006958	0.093616	0.03558
Pf3D7_08_v3	377774	379696	Pf3D7_08_v3	PF3D7_0807200	conserved Plasmodium membrane protein, unknown function	0.059228	0.058222	0.07118	0.029453	0.012217
Pf3D7_08_v3	381314	383097	Pf3D7_08_v3	PF3D7_0807300	ras-related protein Rab-18	-0.137534	-0.113604	-0.020303	0.137246	0.016405
Pf3D7_08_v3	384048	386047	Pf3D7_08_v3	PF3D7_0807400	coenzyme Q-binding protein COQ10 homolog, mitochondrial	0.155039	0.11058	0.130773	0.358772	0.194615
Pf3D7_08_v3	386969	388614	Pf3D7_08_v3	PF3D7_0807500	proteasome subunit alpha type-6, putative	-0.04577	-0.108538	-0.113082	-0.093	-0.060022
Pf3D7_08_v3	389346	394509	Pf3D7_08_v3	PF3D7_0807600	conserved Plasmodium protein, unknown function	0.006403	0.037087	-0.076988	0.143366	0.127529
Pf3D7_08_v3	395398	399037	Pf3D7_08_v3	PF3D7_0807700	serine protease DegP	0.395622	0.141409	0.131438	0.00826	0.025855
Pf3D7_08_v3	399341	401610	Pf3D7_08_v3	PF3D7_0807800	26S proteasome regulatory subunit RPN10, putative	0.062587	-0.084935	-0.132386	-0.121997	-0.121229
Pf3D7_08_v3	402345	404391	Pf3D7_08_v3	PF3D7_0807900	tyrosine--tRNA ligase	0.073468	-0.009149	0.005989	-0.1449	-0.035707
Pf3D7_08_v3	404746	409334	Pf3D7_08_v3	PF3D7_0808000	conserved Plasmodium protein, unknown function	0.008922	-0.050477	-0.060473	-0.010406	0.011257
Pf3D7_08_v3	409686	415418	Pf3D7_08_v3	PF3D7_0808100	AP-3 complex subunit delta, putative	0.021836	0.053634	0.041896	0.095662	0.081708
Pf3D7_08_v3	416094	418315	Pf3D7_08_v3	PF3D7_0808200	plasmepsin X	-0.102972	-0.001484	0.017883	-0.089628	-0.003487
Pf3D7_08_v3	421243	422890	Pf3D7_08_v3	PF3D7_0808300	ubiquitin regulatory protein, putative	0.011353	0.044088	0.03775	0.170686	0.085387
Pf3D7_08_v3	423277	424786	Pf3D7_08_v3	PF3D7_0808400	coatomer subunit epsilon, putative	-0.066305	-0.010005	-0.059165	-0.086107	-0.05109
Pf3D7_08_v3	430915	439301	Pf3D7_08_v3	PF3D7_0808600	erythrocyte membrane protein 1, PfEMP1	0.090496	0.040899	0.013566	0.008095	0.025743
Pf3D7_08_v3	440158	448312	Pf3D7_08_v3	PF3D7_0808700	erythrocyte membrane protein 1, PfEMP1	-0.019795	0.068751	0.078773	0.015248	-0.016455
Pf3D7_08_v3	450365	452149	Pf3D7_08_v3	PF3D7_0808800	rifin	-0.217605	0.091357	0.049285	0.039245	0.076879
Pf3D7_08_v3	453553	455169	Pf3D7_08_v3	PF3D7_0808900	rifin	0.008147	0.024711	-0.016549	0.146201	0.037404
Pf3D7_08_v3	459062	466817	Pf3D7_08_v3	PF3D7_0809100	erythrocyte membrane protein 1, PfEMP1	0.066785	0.058438	0.052672	0.200415	0.175965
Pf3D7_08_v3	467693	472143	Pf3D7_08_v3	PF3D7_0809200	asparagine-rich antigen Pfa55-14	0.072307	0.057948	0.072495	0.176586	0.209669
Pf3D7_08_v3	474003	475429	Pf3D7_08_v3	PF3D7_0809300	unspecified product	-0.122024	-0.028383	0.021175	-0.300487	-0.184172
Pf3D7_08_v3	475430	478318	Pf3D7_08_v3	PF3D7_0809400	conserved protein, unknown function	-0.305441	-0.102605	-0.048337	-0.399855	-0.291821
Pf3D7_08_v3	478319	479076	Pf3D7_08_v3	PF3D7_0809500	histone acetyltransferase subunit NuA4, putative	0.127259	0.074264	0.063292	0.122596	0.181346
Pf3D7_08_v3	479730	497632	Pf3D7_08_v3	PF3D7_0809600	peptidase family C50, putative	-0.055636	-0.016265	-0.02039	-0.09907	-0.088463
Pf3D7_08_v3	499213	501819	Pf3D7_08_v3	PF3D7_0809700	RuvB-like helicase 1	0.02756	0.038952	0.033906	0.213782	0.005643
Pf3D7_08_v3	502088	506948	Pf3D7_08_v3	PF3D7_0809800	conserved Plasmodium protein, unknown function	-0.056391	-0.043831	-0.107159	-0.275567	-0.151607
Pf3D7_08_v3	507974	512678	Pf3D7_08_v3	PF3D7_0809900	JmjC domain-containing protein, putative	-0.065127	0.135376	0.039798	0.021459	0.037055
Pf3D7_08_v3	519081	520241	Pf3D7_08_v3	PF3D7_0810100	apicoplast ribosomal protein L33 precursor, putative	0.043596	-0.028842	-0.015329	-0.069265	-0.018661
Pf3D7_08_v3	520937	524259	Pf3D7_08_v3	PF3D7_0810200	ABC1 family, putative	0.042778	0.088798	0.057954	-0.023711	0.108306
Pf3D7_08_v3	524808	527854	Pf3D7_08_v3	PF3D7_0810300	protein phosphatase PPM5, putative	0.03655	-0.004795	-0.036081	0.036281	0.052536
Pf3D7_08_v3	531970	534250	Pf3D7_08_v3	PF3D7_0810400	aquaporin, putative	-0.002274	0.007433	0.003146	-0.179467	-0.090864
Pf3D7_08_v3	534251	536869	Pf3D7_08_v3	PF3D7_0810500	protein phosphatase PPM7, putative	0.127697	0.092324	0.119268	0.043673	0.095432
Pf3D7_08_v3	541721	545046	Pf3D7_08_v3	PF3D7_0810600	ATP-dependent RNA helicase DBP1, putative	0.013473	-0.057817	-0.007692	-0.180449	-0.10961
Pf3D7_08_v3	545913	547615	Pf3D7_08_v3	PF3D7_0810700	conserved Plasmodium protein, unknown function	0.004846	-0.024297	-0.023491	-0.1436	-0.084708
Pf3D7_08_v3	547950	550866	Pf3D7_08_v3	PF3D7_0810800	hydroxymethyldihydropterin pyrophosphokinase-dihydropteroate synthase	-0.056675	-0.152343	-0.079372	-0.124003	-0.109926
Pf3D7_08_v3	550949	552678	Pf3D7_08_v3	PF3D7_0810900	conserved Plasmodium protein, unknown function	-0.028191	0.032746	0.065106	-0.129119	-0.005041
Pf3D7_08_v3	554187	557455	Pf3D7_08_v3	PF3D7_0811000	cullin-1, putative	0.034306	0.001329	0.003338	-0.080202	-0.064502
Pf3D7_08_v3	557634	559756	Pf3D7_08_v3	PF3D7_0811100	mitochondrial carrier protein, putative	-0.004181	-0.033424	0.058553	-0.146411	-0.01066
Pf3D7_08_v3	560494	564526	Pf3D7_08_v3	PF3D7_0811200	ER membrane protein complex subunit 1, putative	-0.031157	-0.03289	-0.016839	0.070244	0.012912
Pf3D7_08_v3	567574	573398	Pf3D7_08_v3	PF3D7_0811300	CCR4-associated factor 1	0.163291	-0.023573	-0.021776	0.176793	0.112033
Pf3D7_08_v3	575736	578620	Pf3D7_08_v3	PF3D7_0811400	conserved protein, unknown function	-0.010364	-0.075423	-0.093655	0.089361	0.041926
Pf3D7_08_v3	579233	582471	Pf3D7_08_v3	PF3D7_0811500	histone-arginine methyltransferase CARM1, putative	0.010952	-0.067399	0.009509	0.029094	-0.026586
Pf3D7_08_v3	582733	587203	Pf3D7_08_v3	PF3D7_0811600	conserved protein, unknown function	0.050422	-0.028443	0.048779	-0.13475	-0.027782
Pf3D7_08_v3	589571	593569	Pf3D7_08_v3	PF3D7_0811700	conserved Plasmodium protein, unknown function	0.015913	-0.050584	-0.044709	-0.082123	-0.012832
Pf3D7_08_v3	593570	595662	Pf3D7_08_v3	PF3D7_0811800	conserved Plasmodium protein, unknown function	0.023587	-0.034157	-0.066078	-0.007959	-0.018197
Pf3D7_08_v3	595940	600426	Pf3D7_08_v3	PF3D7_0811900	RNA-binding protein, putative	0.012653	-0.051195	-0.014056	-0.112811	-0.065129
Pf3D7_08_v3	600427	602497	Pf3D7_08_v3	PF3D7_0812000	conserved protein, unknown function	0.059487	-0.002138	0.053333	0.112636	0.066055
Pf3D7_08_v3	604673	613101	Pf3D7_08_v3	PF3D7_0812100	proteasome activator complex subunit 4, putative	-0.05432	-0.083505	-0.057132	-0.015285	0.011397
Pf3D7_08_v3	613102	614890	Pf3D7_08_v3	PF3D7_0812220	GTPase, putative	-0.009774	-0.134101	-0.053242	-0.310545	-0.166526
Pf3D7_08_v3	614891	618071	Pf3D7_08_v3	PF3D7_0812200	trypsin-like serine protease, putative	-0.018769	-0.039076	0.024372	-0.09973	-0.012218
Pf3D7_08_v3	618593	620478	Pf3D7_08_v3	PF3D7_0812300	sporozoite surface protein 3, putative	-0.026768	0.028545	0.082654	0.010852	0.078003
Pf3D7_08_v3	621555	623692	Pf3D7_08_v3	PF3D7_0812400	karyopherin alpha	0.049856	0.051277	0.015944	0.021029	0.052305
Pf3D7_08_v3	625819	629195	Pf3D7_08_v3	PF3D7_0812500	RNA-binding protein, putative	0.253842	-0.034701	-0.015689	-0.161995	-0.070076
Pf3D7_08_v3	631334	632479	Pf3D7_08_v3	PF3D7_0812600	ubiquitin-conjugating enzyme E2, putative	0.100192	0.056204	0.04202	-0.057639	0.037178
Pf3D7_08_v3	633740	634947	Pf3D7_08_v3	PF3D7_0812700	U1 small nuclear ribonucleoprotein C, putative	0.103094	-0.06867	-0.095428	-0.028577	-0.017608
Pf3D7_08_v3	636378	641708	Pf3D7_08_v3	PF3D7_0812900	conserved Plasmodium protein, unknown function	0.169871	0.018366	0.058323	0.053064	0.103974
Pf3D7_08_v3	642836	645135	Pf3D7_08_v3	PF3D7_0813000	conserved protein, unknown function	0.042665	-0.063033	-0.036735	-0.136399	-0.1098
Pf3D7_08_v3	647066	649554	Pf3D7_08_v3	PF3D7_0813100	conserved Plasmodium protein, unknown function	-0.057795	-0.014929	-0.033217	-0.280408	-0.067344
Pf3D7_08_v3	651167	653054	Pf3D7_08_v3	PF3D7_0813200	CS domain protein, putative	0.024434	0.059825	0.068396	-0.066168	-0.061952
Pf3D7_08_v3	655828	657880	Pf3D7_08_v3	PF3D7_0813300	conserved protein, unknown function	0.031412	-0.028932	-0.024027	-0.133655	-0.084106
Pf3D7_08_v3	658243	662345	Pf3D7_08_v3	PF3D7_0813400	conserved protein, unknown function	-0.037475	0.028846	-0.013553	0.04094	-0.097903
Pf3D7_08_v3	665298	667345	Pf3D7_08_v3	PF3D7_0813500	PUB domain-containing protein, putative	-0.006099	-0.014092	-0.023849	-0.050322	-0.087853
Pf3D7_08_v3	669291	670945	Pf3D7_08_v3	PF3D7_0813600	translation initiation factor SUI1, putative	-0.023479	0.028206	-0.063512	-0.200996	-0.156236
Pf3D7_08_v3	670946	675666	Pf3D7_08_v3	PF3D7_0813700	ABC transporter F family member 1	-0.032215	-0.01132	-0.137485	-0.1499	-0.138972
Pf3D7_08_v3	676141	677714	Pf3D7_08_v3	PF3D7_0813800	GDP-mannose 4,6-dehydratase	-0.042664	-0.095506	-0.070409	-0.160007	-0.076164
Pf3D7_08_v3	677739	678975	Pf3D7_08_v3	PF3D7_0813900	40S ribosomal protein S16, putative	0.200353	0.095431	0.052037	-0.094708	-0.078777
Pf3D7_08_v3	680707	682059	Pf3D7_08_v3	PF3D7_0814000	60S ribosomal protein L13-2, putative	0.131988	-0.018119	-0.01517	0.187126	0.043278
Pf3D7_08_v3	682268	683822	Pf3D7_08_v3	PF3D7_0814100	conserved Plasmodium protein, unknown function	0.033949	-0.092924	-0.094973	-0.069051	-0.058056
Pf3D7_08_v3	687090	688336	Pf3D7_08_v3	PF3D7_0814200	DNA/RNA-binding protein Alba 1	-0.014641	0.010489	-0.006472	-0.057033	0.041944
Pf3D7_08_v3	690291	694393	Pf3D7_08_v3	PF3D7_0814300	AAA family ATPase, putative	-0.091678	-0.047467	-0.105894	-0.261355	-0.103055
Pf3D7_08_v3	694965	697772	Pf3D7_08_v3	PF3D7_0814400	phospholipase DDHD1, putative	-9.8e-05	-0.033983	-4.9e-05	0.06905	0.070822
Pf3D7_08_v3	700126	702902	Pf3D7_08_v3	PF3D7_0814500	conserved protein, unknown function	0.02455	-0.063485	0.011962	0.031232	-0.113163
Pf3D7_08_v3	703252	704933	Pf3D7_08_v3	PF3D7_0814600	conserved protein, unknown function	0.010828	-0.080651	-0.084946	-0.221267	-0.123213
Pf3D7_08_v3	705826	707246	Pf3D7_08_v3	PF3D7_0814700	conserved Plasmodium protein, unknown function	0.057549	-0.072286	-0.014749	-0.050822	-0.023474
Pf3D7_08_v3	707978	709074	Pf3D7_08_v3	PF3D7_0814900	superoxide dismutase [Fe]	-0.015084	-0.092835	-0.084282	0.06139	0.047131
Pf3D7_08_v3	709083	710850	Pf3D7_08_v3	PF3D7_0815000	selenoprotein	-0.012853	-0.058597	-0.028563	-0.076782	-0.072294
Pf3D7_08_v3	710989	714416	Pf3D7_08_v3	PF3D7_0815100	heptatricopeptide repeat and RAP domain-containing protein, putative	-0.02287	0.064104	0.032553	-0.037514	-0.013844
Pf3D7_08_v3	716863	719996	Pf3D7_08_v3	PF3D7_0815200	importin subunit beta, putative	0.028559	-0.039064	-0.047419	0.173254	0.033796
Pf3D7_08_v3	721678	725628	Pf3D7_08_v3	PF3D7_0815300	FAD-dependent monooxygenase, putative	0.033916	0.012792	0.054902	-0.081553	0.012227
Pf3D7_08_v3	725629	726752	Pf3D7_08_v3	PF3D7_0815400	ATP synthase-associated protein, putative	-0.104189	-0.015729	-0.054745	0.008116	0.037501
Pf3D7_08_v3	727412	729822	Pf3D7_08_v3	PF3D7_0815500	conserved Plasmodium protein, unknown function	-0.017287	0.006593	-0.026689	-0.216262	-0.099304
Pf3D7_08_v3	729823	732437	Pf3D7_08_v3	PF3D7_0815600	eukaryotic translation initiation factor 3 subunit G, putative	0.074696	-0.008952	0.041655	-0.192653	-0.034769
Pf3D7_08_v3	733029	734823	Pf3D7_08_v3	PF3D7_0815700	ubiquitin	0.001159	0.03046	0.039428	-0.074855	0.027941
Pf3D7_08_v3	735430	741431	Pf3D7_08_v3	PF3D7_0815800	vacuolar protein sorting-associated protein 9, putative	0.163081	0.082134	0.095295	-0.167204	0.031911
Pf3D7_08_v3	743255	745755	Pf3D7_08_v3	PF3D7_0815900	dihydrolipoyl dehydrogenase, apicoplast	0.139062	0.016805	-0.016882	0.046645	0.134018
Pf3D7_08_v3	745763	747738	Pf3D7_08_v3	PF3D7_0816000	ribosome assembly protein RRB1, putative	0.130848	0.032326	0.059444	-0.099458	-0.00908
Pf3D7_08_v3	748403	749852	Pf3D7_08_v3	PF3D7_0816100	phosphopantothenoylcysteine decarboxylase, putative	-0.011196	-0.023106	-0.029527	-0.339061	-0.297031
Pf3D7_08_v3	749853	750961	Pf3D7_08_v3	PF3D7_0816200	vacuolar protein sorting-associated protein 2, putative	0.062486	-0.009915	-0.022969	-0.058896	-0.010735
Pf3D7_08_v3	751692	756423	Pf3D7_08_v3	PF3D7_0816300	conserved Plasmodium protein, unknown function	0.087592	-0.025591	0.005614	-0.022972	0.021991
Pf3D7_08_v3	756974	758457	Pf3D7_08_v3	PF3D7_0816400	EF-hand calcium-binding domain-containing protein, putative	-0.024201	0.029457	0.045023	0.015086	-0.037722
Pf3D7_08_v3	759888	761281	Pf3D7_08_v3	PF3D7_0816500	small heat shock protein HSP20, putative	0.021473	0.079313	0.075954	-0.077303	-0.016846
Pf3D7_08_v3	761868	765580	Pf3D7_08_v3	PF3D7_0816600	chaperone protein ClpB1	0.030429	0.002241	-0.05627	0.030701	-0.044472
Pf3D7_08_v3	767899	770042	Pf3D7_08_v3	PF3D7_0816800	meiotic recombination protein DMC1, putative	0.020791	-0.00835	-0.003621	0.012757	-0.003513
Pf3D7_08_v3	770696	772023	Pf3D7_08_v3	PF3D7_0816900	adenylate kinase 2	0.113361	0.107945	0.109685	0.094029	0.051503
Pf3D7_08_v3	772318	773987	Pf3D7_08_v3	PF3D7_0817000	NEDD8-activating enzyme E1 catalytic subunit, putative	0.069171	0.121094	0.035757	-0.013297	0.036658
Pf3D7_08_v3	774049	777024	Pf3D7_08_v3	PF3D7_0817100	tRNA modification GTPase, putative	0.028478	0.002157	-0.032344	-0.084634	-0.061267
Pf3D7_08_v3	777025	779897	Pf3D7_08_v3	PF3D7_0817200	conserved protein, unknown function	0.029704	0.10319	0.046595	-0.038063	0.024349
Pf3D7_08_v3	782659	789866	Pf3D7_08_v3	PF3D7_0817300	conserved Plasmodium protein, unknown function	0.068003	0.030924	0.159585	0.161286	0.111387
Pf3D7_08_v3	794037	798056	Pf3D7_08_v3	PF3D7_0817400	phosphatase, putative	-0.105003	0.00422	-0.021838	0.113595	-0.048087
Pf3D7_08_v3	798527	800455	Pf3D7_08_v3	PF3D7_0817500	histidine triad nucleotide-binding protein 1	0.025626	0.050447	0.016616	0.024328	0.027139
Pf3D7_08_v3	800670	804284	Pf3D7_08_v3	PF3D7_0817600	conserved protein, unknown function	0.005226	-0.02455	-0.017252	-0.082727	-0.013837
Pf3D7_08_v3	805547	813715	Pf3D7_08_v3	PF3D7_0817700	rhoptry neck protein 5	-0.015301	-0.054597	-0.068035	0.102904	0.033857
Pf3D7_08_v3	816553	817352	Pf3D7_08_v3	PF3D7_0817900	high mobility group protein B2	-0.106522	-0.053302	-0.059661	0.056283	-0.03532
Pf3D7_08_v3	821084	822702	Pf3D7_08_v3	PF3D7_0818000	U4/U6.U5 small nuclear ribonucleoprotein, putative	0.078047	-0.046599	-0.036465	-0.146369	-0.071367
Pf3D7_08_v3	824314	826768	Pf3D7_08_v3	PF3D7_0818100	zinc finger protein, putative	0.097676	0.033303	0.013204	0.160119	0.117205
Pf3D7_08_v3	829756	831704	Pf3D7_08_v3	PF3D7_0818200	14-3-3 protein	0.138529	0.04419	0.011197	-0.07005	0.003106
Pf3D7_08_v3	832935	835584	Pf3D7_08_v3	PF3D7_0818300	dynactin subunit 6, putative	0.14001	-0.11485	-0.113439	-0.11174	-0.036433
Pf3D7_08_v3	835728	837098	Pf3D7_08_v3	PF3D7_0818400	rRNA-processing protein FCF1, putative	-0.030132	-0.102876	-0.086473	-0.016039	0.019961
Pf3D7_08_v3	842067	843465	Pf3D7_08_v3	PF3D7_0818500	zinc finger protein, putative	0.042994	-0.060641	-0.063515	-0.074624	-0.076184
Pf3D7_08_v3	845003	847630	Pf3D7_08_v3	PF3D7_0818600	BEM46-like protein, putative	0.006242	-0.076683	-0.131221	-0.177369	-0.122702
Pf3D7_08_v3	848027	853197	Pf3D7_08_v3	PF3D7_0818700	DNA helicase, putative	0.03661	-0.126737	-0.124598	0.123482	-0.089176
Pf3D7_08_v3	855404	856992	Pf3D7_08_v3	PF3D7_0818800	U3 small nucleolar ribonucleoprotein protein IMP4, putative	-0.112093	-0.176518	-0.086561	-0.094301	-0.201935
Pf3D7_08_v3	860134	862667	Pf3D7_08_v3	PF3D7_0818900	heat shock protein 70	-0.002911	0.007648	0.032562	0.025897	0.012135
Pf3D7_08_v3	863255	868387	Pf3D7_08_v3	PF3D7_0819000	conserved Plasmodium protein, unknown function	0.063145	-0.051358	-0.043703	-0.045248	-0.117123
Pf3D7_08_v3	869312	870824	Pf3D7_08_v3	PF3D7_0819100	BRIX domain, putative	0.220244	0.04088	0.031947	-0.132303	-0.113667
Pf3D7_08_v3	871160	873690	Pf3D7_08_v3	PF3D7_0819200	perforin-like protein 5	0.1215	-0.000653	-0.002386	0.018358	0.029014
Pf3D7_08_v3	874117	877748	Pf3D7_08_v3	PF3D7_0819300	conserved Plasmodium protein, unknown function	0.02445	-0.059036	-0.084157	-0.053734	0.00132
Pf3D7_08_v3	878245	880709	Pf3D7_08_v3	PF3D7_0819400	perforin-like protein 4	-0.023732	0.066989	0.072398	0.261829	0.146204
Pf3D7_08_v3	881340	884640	Pf3D7_08_v3	PF3D7_0819500	conserved protein, unknown function	0.151338	0.082504	0.034676	0.028286	0.067258
Pf3D7_08_v3	884948	886386	Pf3D7_08_v3	PF3D7_0819600	conserved protein, unknown function	0.067831	-0.042629	-0.045333	0.051855	0.061449
Pf3D7_08_v3	887876	890721	Pf3D7_08_v3	PF3D7_0819700	conserved Plasmodium protein, unknown function	-0.006406	-0.078441	-0.042103	-0.006743	-0.026162
Pf3D7_08_v3	891408	898752	Pf3D7_08_v3	PF3D7_0819800	conserved Plasmodium protein, unknown function	0.005705	-0.024578	0.035748	-0.081233	0.000605
Pf3D7_08_v3	900492	907964	Pf3D7_08_v3	PF3D7_0820000	Snf2-related CBP activator, putative	0.00619	0.049774	0.13091	-0.055291	-0.061628
Pf3D7_08_v3	908957	910966	Pf3D7_08_v3	PF3D7_0820100	RNA-binding protein, putative	0.020757	-0.071315	-0.009862	0.0524	-0.068834
Pf3D7_08_v3	912014	914499	Pf3D7_08_v3	PF3D7_0820200	phosphatidylglycerophosphate synthase	0.00899	-0.022658	-0.00418	0.015061	-0.011666
Pf3D7_08_v3	918805	921146	Pf3D7_08_v3	PF3D7_0820300	conserved Plasmodium protein, unknown function	0.019802	-0.018171	-0.032058	-0.025999	-0.012284
Pf3D7_08_v3	921958	924182	Pf3D7_08_v3	PF3D7_0820400	conserved Plasmodium protein, unknown function	0.110428	0.151185	-0.00155	0.135122	0.11332
Pf3D7_08_v3	924863	927921	Pf3D7_08_v3	PF3D7_0820500	protein transport protein YIF1, putative	-0.061248	0.008983	0.013341	-0.171546	-0.097167
Pf3D7_08_v3	928895	931111	Pf3D7_08_v3	PF3D7_0820600	conserved protein, unknown function	-0.122445	-0.037132	-0.08745	-0.158222	-0.036065
Pf3D7_08_v3	932071	935876	Pf3D7_08_v3	PF3D7_0820700	2-oxoglutarate dehydrogenase E1 component	-0.08685	-0.019472	-0.016174	-0.095758	-0.05174
Pf3D7_08_v3	936176	939126	Pf3D7_08_v3	PF3D7_0820800	conserved Plasmodium protein, unknown function	-0.133895	-0.058966	-0.064572	-0.11642	-0.085758
Pf3D7_08_v3	939333	944895	Pf3D7_08_v3	PF3D7_0820900	conserved Plasmodium protein, unknown function	0.065009	0.073646	0.06024	-0.082068	-0.106979
Pf3D7_08_v3	948495	951149	Pf3D7_08_v3	PF3D7_0821000	conserved Plasmodium protein, unknown function	0.075373	-0.02629	-0.018029	0.040877	0.062517
Pf3D7_08_v3	953198	956564	Pf3D7_08_v3	PF3D7_0821100	protein kinase 1	0.0775	-0.124176	-0.039864	-0.134074	-0.003499
Pf3D7_08_v3	957248	958302	Pf3D7_08_v3	PF3D7_0821200	conserved protein, unknown function	-0.055721	-0.042506	-0.041279	-0.140224	-0.151118
Pf3D7_08_v3	958303	961990	Pf3D7_08_v3	PF3D7_0821300	ATP-dependent RNA helicase DHX36, putative	0.098864	-0.087907	0.000555	-0.100739	-0.140417
Pf3D7_08_v3	965572	966907	Pf3D7_08_v3	PF3D7_0821400	conserved Plasmodium protein, unknown function	0.046839	-0.004963	-0.013107	-0.070524	-0.062584
Pf3D7_08_v3	967651	968990	Pf3D7_08_v3	PF3D7_0821500	ribosomal RNA small subunit methyltransferase NEP1, putative	-0.064004	-0.09149	-0.042184	-0.086885	-0.11578
Pf3D7_08_v3	969440	971964	Pf3D7_08_v3	PF3D7_0821600	polyribonucleotide 5'-hydroxyl-kinase Clp1, putative	0.017673	0.012449	-0.011063	-0.132606	-0.082482
Pf3D7_08_v3	973336	974517	Pf3D7_08_v3	PF3D7_0821700	60S ribosomal protein L22, putative	0.016915	-0.039381	-0.092984	-0.474289	-0.261658
Pf3D7_08_v3	975824	976894	Pf3D7_08_v3	PF3D7_0821800	protein transport protein SEC61 subunit beta, putative	0.220883	-0.040823	0.156249	0.034775	0.026606
Pf3D7_08_v3	977182	978438	Pf3D7_08_v3	PF3D7_0821900	conserved protein, unknown function	-0.007199	-0.143039	-0.05572	-0.103821	-0.151256
Pf3D7_08_v3	978548	980826	Pf3D7_08_v3	PF3D7_0822000	ribosomal protein L4, mitochondrial, putative	0.175309	0.01719	-0.032881	-0.000829	-0.011093
Pf3D7_08_v3	980827	981972	Pf3D7_08_v3	PF3D7_0822100	mediator of RNA polymerase II transcription subunit 7, putative	0.043479	-0.003845	-0.049652	-0.136266	-0.059348
Pf3D7_08_v3	982320	987946	Pf3D7_08_v3	PF3D7_0822200	phosphorylated CTD interacting factor 1 WW domain-containing protein, putative	0.057029	-0.233877	-0.034521	-0.179982	-0.123322
Pf3D7_08_v3	990000	992631	Pf3D7_08_v3	PF3D7_0822400	conserved Plasmodium protein, unknown function	0.027681	0.022819	0.048783	0.079292	0.052646
Pf3D7_08_v3	992632	994215	Pf3D7_08_v3	PF3D7_0822500	dynein light chain 1	-0.041686	-0.090847	-0.202836	-0.054254	-0.053931
Pf3D7_08_v3	996805	999779	Pf3D7_08_v3	PF3D7_0822600	protein transport protein SEC23	-0.037327	-0.027041	-0.04718	-0.051409	-0.111273
Pf3D7_08_v3	1000731	1004005	Pf3D7_08_v3	PF3D7_0822700	thrombospondin-related protein 1, putative	0.092863	-0.015066	-0.003235	-0.030246	-0.100843
Pf3D7_08_v3	1005586	1007060	Pf3D7_08_v3	PF3D7_0822800	U5 small nuclear ribonucleoprotein 40 kDa protein, putative	0.078954	0.012293	-0.047988	-0.199629	-0.116557
Pf3D7_08_v3	1007527	1011557	Pf3D7_08_v3	PF3D7_0822900	conserved Plasmodium protein, unknown function	0.030309	-0.050268	-0.06777	-0.025202	-0.024313
Pf3D7_08_v3	1012677	1017626	Pf3D7_08_v3	PF3D7_0823000	serine/threonine protein kinase VPS15, putative	0.008765	-0.017869	-0.08445	-0.007471	-0.027258
Pf3D7_08_v3	1017839	1019518	Pf3D7_08_v3	PF3D7_0823100	RWD domain-containing protein, putative	-0.079754	-0.026661	-0.079213	0.02262	-0.064749
Pf3D7_08_v3	1022379	1024096	Pf3D7_08_v3	PF3D7_0823200	RNA-binding protein, putative	0.094737	0.035624	0.045458	0.035178	0.013707
Pf3D7_08_v3	1028502	1033764	Pf3D7_08_v3	PF3D7_0823300	histone acetyltransferase GCN5	0.023279	-0.005841	-0.027168	-0.002584	0.025643
Pf3D7_08_v3	1034167	1036678	Pf3D7_08_v3	PF3D7_0823400	alpha/beta hydrolase, putative	0.035132	-0.040369	-0.082031	0.192342	0.152185
Pf3D7_08_v3	1036850	1038858	Pf3D7_08_v3	PF3D7_0823500	inner membrane complex protein 1i, putative	-0.157315	-0.102482	-0.147564	-0.079593	-0.107739
Pf3D7_08_v3	1039657	1041461	Pf3D7_08_v3	PF3D7_0823600	lipoate-protein ligase B	-0.040411	-0.038028	-0.059375	-0.15768	-0.051964
Pf3D7_08_v3	1043563	1046030	Pf3D7_08_v3	PF3D7_0823800	DnaJ protein, putative	-0.006895	0.044735	-0.026163	0.050218	0.092236
Pf3D7_08_v3	1047301	1048757	Pf3D7_08_v3	PF3D7_0823900	dicarboxylate/tricarboxylate carrier	-0.02069	0.043168	-0.009952	0.01734	0.032385
Pf3D7_08_v3	1049032	1051955	Pf3D7_08_v3	PF3D7_0824000	conserved Plasmodium protein, unknown function	-0.186357	-0.145814	-0.116137	-0.081355	-0.140455
Pf3D7_08_v3	1052521	1054241	Pf3D7_08_v3	PF3D7_0824100	exonuclease, putative	-0.099766	-0.050618	-0.12202	-0.092174	0.013536
Pf3D7_08_v3	1054885	1059124	Pf3D7_08_v3	PF3D7_0824200	conserved Plasmodium protein, unknown function	0.017102	0.097516	0.03129	-0.097986	-0.003447
Pf3D7_08_v3	1059125	1061817	Pf3D7_08_v3	PF3D7_0824300	GTP-binding protein Obg2, putative	-0.000527	0.021529	0.032558	-0.017338	0.03032
Pf3D7_08_v3	1062054	1064311	Pf3D7_08_v3	PF3D7_0824400	nucleoside transporter 2	-0.137028	-0.058868	-0.010692	-0.092113	-0.043009
Pf3D7_08_v3	1065904	1067722	Pf3D7_08_v3	PF3D7_0824500	conserved protein, unknown function	0.08269	-0.017664	-0.002789	-0.119684	-0.035089
Pf3D7_08_v3	1068313	1070152	Pf3D7_08_v3	PF3D7_0824600	Fe-S cluster assembly protein DRE2, putative	0.070609	0.038063	0.05049	-0.16488	-0.037744
Pf3D7_08_v3	1070738	1074667	Pf3D7_08_v3	PF3D7_0824700	lipase maturation factor, putative	0.029725	0.045764	0.037705	-0.098027	-0.037349
Pf3D7_08_v3	1075550	1079842	Pf3D7_08_v3	PF3D7_0824800	conserved Plasmodium membrane protein, unknown function	-0.144546	0.007191	0.029829	0.011487	0.008402
Pf3D7_08_v3	1079843	1083241	Pf3D7_08_v3	PF3D7_0824900	conserved Plasmodium protein, unknown function	-0.031643	-0.140826	-0.064792	-0.185866	-0.184717
Pf3D7_08_v3	1085798	1091498	Pf3D7_08_v3	PF3D7_0825000	conserved Plasmodium protein, unknown function	-0.027201	0.000327	0.039207	-0.061026	0.030963
Pf3D7_08_v3	1091748	1093455	Pf3D7_08_v3	PF3D7_0825100	ankyrin-repeat protein, putative	-0.017455	-0.09635	-0.040745	-0.167834	-0.0474
Pf3D7_08_v3	1093456	1094739	Pf3D7_08_v3	PF3D7_0825200	translation initiation factor IF-3	0.027361	-0.089777	0.008875	-0.090496	-0.07005
Pf3D7_08_v3	1096173	1097613	Pf3D7_08_v3	PF3D7_0825400	ATP synthase-associated protein, putative	0.01272	-0.017955	-0.047289	-0.109553	-0.046336
Pf3D7_08_v3	1098234	1100596	Pf3D7_08_v3	PF3D7_0825500	protein KRI1, putative	-0.039142	0.100567	0.023065	-0.138918	-0.041506
Pf3D7_08_v3	1101637	1103054	Pf3D7_08_v3	PF3D7_0825700	crystalloid-specific PH domain-containing protein, putative	0.025288	-0.040266	0.027751	-0.207605	-0.046605
Pf3D7_08_v3	1103518	1105358	Pf3D7_08_v3	PF3D7_0825800	conserved protein, unknown function	-0.033811	0.02319	0.032352	0.000562	-0.030015
Pf3D7_08_v3	1105798	1108211	Pf3D7_08_v3	PF3D7_0825900	conserved Plasmodium protein, unknown function	0.035576	-0.092073	-0.142792	-0.14751	-0.064223
Pf3D7_08_v3	1109026	1113044	Pf3D7_08_v3	PF3D7_0826000	conserved Plasmodium protein, unknown function	0.023436	0.114885	0.02863	-0.253584	-0.055234
Pf3D7_08_v3	1113119	1139394	Pf3D7_08_v3	PF3D7_0826100	HECT-like E3 ubiquitin ligase, putative	0.167852	0.064152	0.099613	0.022108	0.151584
Pf3D7_08_v3	1142249	1144557	Pf3D7_08_v3	PF3D7_0826200	alpha/beta hydrolase, putative	0.099077	0.047172	0.092369	0.185473	0.161367
Pf3D7_08_v3	1145917	1147754	Pf3D7_08_v3	PF3D7_0826300	SPRY domain, putative	-0.137248	-0.09692	-0.20864	-0.228999	-0.084179
Pf3D7_08_v3	1147760	1150080	Pf3D7_08_v3	PF3D7_0826400	dehydrodolichyl diphosphate synthetase, putative	-0.001706	0.022259	-0.014636	-0.022618	-0.003218
Pf3D7_08_v3	1152052	1156532	Pf3D7_08_v3	PF3D7_0826500	ubiquitin conjugation factor E4 B, putative	0.067335	0.013598	-0.02287	-0.19598	-0.117938
Pf3D7_08_v3	1157071	1158401	Pf3D7_08_v3	PF3D7_0826600	SNARE protein, putative	0.080267	0.075969	0.010431	0.004773	0.029189
Pf3D7_08_v3	1159914	1161958	Pf3D7_08_v3	PF3D7_0826700	receptor for activated c kinase	-0.024441	0.032199	0.012201	-0.150209	0.009454
Pf3D7_08_v3	1164405	1167392	Pf3D7_08_v3	PF3D7_0826900	conserved Plasmodium protein, unknown function	0.017069	-0.016403	0.026581	-0.050512	-0.014815
Pf3D7_08_v3	1167393	1171698	Pf3D7_08_v3	PF3D7_0827000	ATP-dependent RNA helicase DBP10, putative	-0.132314	-0.087009	-0.075447	-0.167317	-0.123986
Pf3D7_08_v3	1172144	1176837	Pf3D7_08_v3	PF3D7_0827100	translation initiation factor IF-2, putative	0.002212	-0.0561	-0.058075	-0.0293	-0.04845
Pf3D7_08_v3	1177060	1180574	Pf3D7_08_v3	PF3D7_0827200	conserved Plasmodium protein, unknown function	-0.046407	-0.016642	-0.058824	-0.040242	0.007156
Pf3D7_08_v3	1181045	1184046	Pf3D7_08_v3	PF3D7_0827300	conserved Plasmodium protein, unknown function	0.065292	-0.088866	-0.061657	0.027774	0.067676
Pf3D7_08_v3	1184345	1185501	Pf3D7_08_v3	PF3D7_0827400	conserved Plasmodium protein, unknown function	-0.002865	0.006383	-0.08603	-0.020144	-0.012469
Pf3D7_08_v3	1185925	1187374	Pf3D7_08_v3	PF3D7_0827500	ribosomal protein L21, apicoplast, putative	-0.098577	-0.078021	-0.047207	0.077624	-0.092573
Pf3D7_08_v3	1187375	1193175	Pf3D7_08_v3	PF3D7_0827600	conserved Plasmodium protein, unknown function	-0.044808	-0.055769	0.017275	-0.172837	-0.090284
Pf3D7_08_v3	1193597	1196928	Pf3D7_08_v3	PF3D7_0827700	magnesium transporter, putative	-0.080741	0.039049	-0.019211	-0.337826	-0.113684
Pf3D7_08_v3	1198608	1206307	Pf3D7_08_v3	PF3D7_0827800	SET domain protein, putative	-0.100483	-0.049782	-0.036809	0.029918	-0.005628
Pf3D7_08_v3	1206538	1208644	Pf3D7_08_v3	PF3D7_0827900	protein disulfide isomerase	0.002634	-0.025815	-0.01091	0.027516	-0.001301
Pf3D7_08_v3	1210442	1212098	Pf3D7_08_v3	PF3D7_0828000	rhomboid protease ROM3	-0.027197	0.007989	0.050885	0.087502	0.00514
Pf3D7_08_v3	1212099	1215880	Pf3D7_08_v3	PF3D7_0828100	conserved Plasmodium protein, unknown function	-0.036683	0.002369	0.029002	0.141587	0.032556
Pf3D7_08_v3	1216021	1220870	Pf3D7_08_v3	PF3D7_0828200	leucine--tRNA ligase, putative	0.091962	0.015981	0.012114	0.284358	0.12853
Pf3D7_08_v3	1220871	1222933	Pf3D7_08_v3	PF3D7_0828300	conserved protein, unknown function	-0.097829	0.054403	0.028095	-0.06397	0.088633
Pf3D7_08_v3	1223844	1226113	Pf3D7_08_v3	PF3D7_0828400	mitochondrial inner membrane protein OXA1, putative	-0.099634	0.006432	0.004043	-0.045429	-0.049193
Pf3D7_08_v3	1226500	1228659	Pf3D7_08_v3	PF3D7_0828500	translation initiation factor eIF-2B subunit alpha, putative	0.027976	-0.014146	0.004431	0.01416	-0.014112
Pf3D7_08_v3	1229649	1232382	Pf3D7_08_v3	PF3D7_0828600	folate transporter 1	-0.048151	-0.050631	-0.020078	-0.068319	-0.005392
Pf3D7_08_v3	1233122	1236723	Pf3D7_08_v3	PF3D7_0828700	conserved protein, unknown function	-0.070702	-0.022666	-0.040947	-0.024819	-0.00106
Pf3D7_08_v3	1237035	1239751	Pf3D7_08_v3	PF3D7_0828800	GPI-anchored micronemal antigen	-0.017078	0.040081	0.031001	0.169191	0.075427
Pf3D7_08_v3	1241716	1243145	Pf3D7_08_v3	PF3D7_0828900	conserved protein, unknown function	-0.102895	0.065444	-0.001487	-0.083998	-0.028552
Pf3D7_08_v3	1244961	1251328	Pf3D7_08_v3	PF3D7_0829000	conserved Plasmodium membrane protein, unknown function	-0.186331	-0.070062	-0.112488	-0.041048	0.006602
Pf3D7_08_v3	1252099	1254046	Pf3D7_08_v3	PF3D7_0829100	coiled-coil domain-containing protein 124, putative	-0.03547	0.009528	-0.009783	-0.079302	-0.0437
Pf3D7_08_v3	1254308	1255626	Pf3D7_08_v3	PF3D7_0829200	prohibitin 1, putative	-0.058824	-0.01056	0.003059	0.115976	0.031125
Pf3D7_08_v3	1256305	1257383	Pf3D7_08_v3	PF3D7_0829300	U6 snRNA-associated Sm-like protein LSm8, putative	-0.063817	-0.059046	-0.031458	0.007426	-0.029208
Pf3D7_08_v3	1257466	1259291	Pf3D7_08_v3	PF3D7_0829400	prolyl 4-hydroxylase subunit alpha, putative	0.097578	-0.067363	-0.063339	0.120929	0.118451
Pf3D7_08_v3	1259798	1266948	Pf3D7_08_v3	PF3D7_0829500	conserved Plasmodium protein, unknown function	0.017084	-0.126603	-0.123335	0.064964	0.021984
Pf3D7_08_v3	1268885	1269897	Pf3D7_08_v3	PF3D7_0829600	early transcribed membrane protein 8	-0.154641	-0.051817	-0.003818	0.001283	-0.002871
Pf3D7_08_v3	1271028	1272340	Pf3D7_08_v3	PF3D7_0829700	unspecified product	-0.184925	-0.0737	-0.108927	-0.056107	-0.077338
Pf3D7_08_v3	1272468	1275540	Pf3D7_08_v3	PF3D7_0829800	unspecified product	-0.043356	0.059378	0.022456	0.159525	0.060731
Pf3D7_08_v3	1275541	1279045	Pf3D7_08_v3	PF3D7_0829900	unspecified product	-0.145046	-0.076643	-0.017789	0.107731	0.020336
Pf3D7_08_v3	1280685	1284011	Pf3D7_08_v3	PF3D7_0830100	unspecified product	-0.110864	0.008208	-0.085181	0.109642	0.04028
Pf3D7_08_v3	1284328	1288005	Pf3D7_08_v3	PF3D7_0830200	28S ribosomal RNA	-0.073756	-0.04955	-0.028132	0.057621	0.068343
Pf3D7_08_v3	1289990	1291656	Pf3D7_08_v3	PF3D7_0830300	sporozoite invasion-associated protein 2	-0.208084	-0.090441	-0.088306	0.14619	-0.032787
Pf3D7_08_v3	1293772	1294972	Pf3D7_08_v3	PF3D7_0830400	CRA domain-containing protein, putative	-0.093262	0.018339	0.019639	-0.082114	0.004549
Pf3D7_08_v3	1295884	1298578	Pf3D7_08_v3	PF3D7_0830500	sporozoite and liver stage tryptophan-rich protein, putative	-0.061649	-0.127714	-0.044797	-0.128455	-0.140649
Pf3D7_08_v3	1303073	1305063	Pf3D7_08_v3	PF3D7_0830600	Plasmodium exported protein (PHISTc), unknown function	-0.124762	-0.052683	0.067591	-0.088772	0.022635
Pf3D7_08_v3	1306803	1308174	Pf3D7_08_v3	PF3D7_0830700	Plasmodium exported protein (hyp9), unknown function	0.067796	-0.005216	-0.015942	0.001893	0.05809
Pf3D7_08_v3	1310387	1317205	Pf3D7_08_v3	PF3D7_0830800	surface-associated interspersed protein 8.2 (SURFIN 8.2)	-0.003801	-0.004641	0.04468	-0.004707	-0.001126
Pf3D7_08_v3	1317350	1318591	Pf3D7_08_v3	PF3D7_0830900	Plasmodium exported protein, unknown function	-0.096512	-0.066571	0.018946	0.00044	0.070309
Pf3D7_08_v3	1321167	1323075	Pf3D7_08_v3	PF3D7_0831000	Plasmodium exported protein (PHISTb), unknown function	-0.102394	-0.090378	-0.080441	0.00118	-0.046734
Pf3D7_08_v3	1324894	1331437	Pf3D7_08_v3	PF3D7_0831100	surface-associated interspersed protein 8.1 (SURFIN 8.1)	-0.143356	-0.041082	-0.12219	0.069384	0.024804
Pf3D7_08_v3	1333038	1336549	Pf3D7_08_v3	PF3D7_0831200	DnaJ protein, putative	-0.110721	-0.046612	-0.089766	0.115672	0.03392
Pf3D7_08_v3	1339409	1342556	Pf3D7_08_v3	PF3D7_0831300	Plasmodium exported protein, unknown function	-0.056777	0.04344	-0.009526	0.089898	0.036664
Pf3D7_08_v3	1344155	1345737	Pf3D7_08_v3	PF3D7_0831400	Plasmodium exported protein, unknown function	0.023709	0.106499	0.037855	0.083043	0.053269
Pf3D7_08_v3	1353206	1354919	Pf3D7_08_v3	PF3D7_0831500	Plasmodium exported protein (PHIST), unknown function	-0.082938	-0.027666	-0.043966	0.075159	0.020747
Pf3D7_08_v3	1358064	1363868	Pf3D7_08_v3	PF3D7_0831600	cytoadherence linked asexual protein 8	-0.130634	-0.007298	0.064123	0.143911	0.075381
Pf3D7_08_v3	1365217	1367756	Pf3D7_08_v3	PF3D7_0831700	heat shock protein 70	-0.182826	-0.054918	-0.112843	-0.321562	-0.190584
Pf3D7_08_v3	1405585	1407249	Pf3D7_08_v3	PF3D7_0832600	stevor	-0.119202	-0.029443	-0.040542	-0.042308	-0.035029
Pf3D7_08_v3	1414033	1415543	Pf3D7_08_v3	PF3D7_0832900	stevor	-0.042136	-0.016403	-0.017681	0.205211	0.139656
Pf3D7_08_v3	1417188	1418875	Pf3D7_08_v3	PF3D7_0833000	rifin	-0.069224	-0.159055	0.002265	-0.18001	-0.142865
Pf3D7_08_v3	1420568	1422327	Pf3D7_08_v3	PF3D7_0833100	rifin	0.194885	-0.033691	0.057084	-0.237135	0.022649
Pf3D7_08_v3	1429080	1430764	Pf3D7_08_v3	PF3D7_0833300	erythrocyte membrane protein 1 (PfEMP1), exon 2, pseudogene	0.036815	-0.096052	-0.169834	0.133904	-0.035412
Pf3D7_08_v3	1435544	1443699	Pf3D7_08_v3	PF3D7_0833500	erythrocyte membrane protein 1, PfEMP1	-0.041681	-0.032637	-0.053213	0.100903	-0.033906
Pf3D7_09_v3	19830	28135	Pf3D7_09_v3	PF3D7_0900100	erythrocyte membrane protein 1, PfEMP1	0.031343	-0.06179	-0.041373	0.565257	0.330877
Pf3D7_09_v3	33303	35045	Pf3D7_09_v3	PF3D7_0900300	rifin	0.118471	-0.025457	-0.01115	0.408328	0.279074
Pf3D7_09_v3	39304	40990	Pf3D7_09_v3	PF3D7_0900400	rifin	-0.170354	-0.186159	-0.094418	-0.019599	-0.028318
Pf3D7_09_v3	45652	47486	Pf3D7_09_v3	PF3D7_0900600	rifin	-0.046343	-0.095897	-0.043719	0.479963	0.209326
Pf3D7_09_v3	49362	51221	Pf3D7_09_v3	PF3D7_0900700	rifin	0.024291	-0.041792	-0.040899	0.232321	0.172048
Pf3D7_09_v3	54824	56331	Pf3D7_09_v3	PF3D7_0900900	stevor	-0.141261	-0.103649	-0.11059	0.201855	0.117675
Pf3D7_09_v3	57912	59490	Pf3D7_09_v3	PF3D7_0901000	rifin	0.038122	-0.00794	0.101982	0.472478	0.281267
Pf3D7_09_v3	63966	64678	Pf3D7_09_v3	PF3D7_0901200	Plasmodium exported protein, unknown function, fragment	-0.045723	-0.145716	-0.058961	0.22829	0.03713
Pf3D7_09_v3	67084	68875	Pf3D7_09_v3	PF3D7_0901300	rifin	-0.085975	-0.138048	-0.067423	0.192302	0.082973
Pf3D7_09_v3	74159	75996	Pf3D7_09_v3	PF3D7_0901500	rifin	0.013591	-0.058446	-0.086071	0.101159	0.082058
Pf3D7_09_v3	77611	79124	Pf3D7_09_v3	PF3D7_0901600	stevor	-0.029406	-0.029373	-0.053296	0.208405	0.142446
Pf3D7_09_v3	81752	83248	Pf3D7_09_v3	PF3D7_0901700	Plasmodium exported protein (hyp5), unknown function	-0.060513	-0.050029	-0.015695	0.462118	0.165376
Pf3D7_09_v3	84374	85860	Pf3D7_09_v3	PF3D7_0901800	Plasmodium exported protein, unknown function	-0.185524	-0.203233	-0.172323	0.449419	0.145308
Pf3D7_09_v3	86134	88325	Pf3D7_09_v3	PF3D7_0901900	probable protein, unknown function	-0.106099	-0.065941	0.016525	0.23232	0.15683
Pf3D7_09_v3	89111	91545	Pf3D7_09_v3	PF3D7_0902000	serine/threonine protein kinase, FIKK family	0.17849	0.059171	0.086206	0.266079	0.24657
Pf3D7_09_v3	93580	95863	Pf3D7_09_v3	PF3D7_0902100	serine/threonine protein kinase, FIKK family	-0.267454	-0.369876	-0.361955	-0.75341	-0.472122
Pf3D7_09_v3	97925	100589	Pf3D7_09_v3	PF3D7_0902200	serine/threonine protein kinase, FIKK family	-0.125833	-0.071852	-0.05532	0.008171	-0.060762
Pf3D7_09_v3	102242	104843	Pf3D7_09_v3	PF3D7_0902300	serine/threonine protein kinase, FIKK family	-0.079408	-0.001346	-0.02358	0.016986	-0.040119
Pf3D7_09_v3	106264	108656	Pf3D7_09_v3	PF3D7_0902400	serine/threonine protein kinase, FIKK family	-0.143642	-0.027302	0.005907	0.098283	0.075782
Pf3D7_09_v3	109084	111579	Pf3D7_09_v3	PF3D7_0902500	serine/threonine protein kinase, FIKK family	-0.08556	-0.127628	-0.15053	0.297013	0.106829
Pf3D7_09_v3	113159	115799	Pf3D7_09_v3	PF3D7_0902600	serine/threonine protein kinase, FIKK family	-0.086835	-0.05564	-0.085136	0.073446	-0.005899
Pf3D7_09_v3	119011	120999	Pf3D7_09_v3	PF3D7_0902700	Plasmodium exported protein (PHISTb), unknown function, pseudogene	-0.036475	-0.057194	-0.020314	0.023053	-0.005251
Pf3D7_09_v3	121371	125256	Pf3D7_09_v3	PF3D7_0902800	serine repeat antigen 9	0.204049	0.024338	0.039941	0.516032	0.23227
Pf3D7_09_v3	127166	127974	Pf3D7_09_v3	PF3D7_0902900	conserved Plasmodium protein, unknown function	-0.115838	-0.031335	-0.027783	0.089134	0.025076
Pf3D7_09_v3	129921	131187	Pf3D7_09_v3	PF3D7_0903100	protein RER1, putative	-0.140216	-0.114	-0.139054	-0.036039	-0.069406
Pf3D7_09_v3	133512	135837	Pf3D7_09_v3	PF3D7_0903200	ras-related protein RAB7	0.117201	-0.049069	-0.108258	-0.151931	-0.08782
Pf3D7_09_v3	140727	150838	Pf3D7_09_v3	PF3D7_0903300	conserved protein, unknown function	-0.189193	-0.019019	-0.05518	0.086183	-0.048994
Pf3D7_09_v3	151450	159791	Pf3D7_09_v3	PF3D7_0903400	ATP-dependent RNA helicase DDX60, putative	-0.099441	-0.009008	-0.03746	0.194945	0.138929
Pf3D7_09_v3	162519	167173	Pf3D7_09_v3	PF3D7_0903500	nucleoporin NUP138, putative	-0.082341	-0.013877	-0.026386	0.167365	0.160935
Pf3D7_09_v3	168243	173137	Pf3D7_09_v3	PF3D7_0903600	conserved protein, unknown function, unspecified product	-0.040765	-0.04009	0.011041	0.049866	0.011617
Pf3D7_09_v3	175292	177692	Pf3D7_09_v3	PF3D7_0903700	alpha tubulin 1	-0.110309	-0.167374	-0.10145	0.030843	-0.111141
Pf3D7_09_v3	178937	184241	Pf3D7_09_v3	PF3D7_0903800	LCCL domain-containing protein	0.029295	-0.080579	-0.053652	0.091725	0.01746
Pf3D7_09_v3	185571	186633	Pf3D7_09_v3	PF3D7_0903900	60S ribosomal protein L32	-0.098828	-0.049548	-0.113544	0.032227	0.006863
Pf3D7_09_v3	187092	188872	Pf3D7_09_v3	PF3D7_0904000	GTPase-activating protein, putative	-0.216742	-0.050833	-0.056632	0.01915	-0.062086
Pf3D7_09_v3	190608	196077	Pf3D7_09_v3	PF3D7_0904100	AP-4 complex subunit epsilon, putative	-0.057779	-0.054806	0.014097	0.014491	-0.012296
[truncated: 3,089 more rows]
