# Supplementary material for: Diverse evolutionary pathways challenge the use of collateral sensitivity as a strategy to suppress resistance
Source: eLife. 2023 Sep 22;12:e85023. doi: 10.7554/eLife.85023 (PMC10695565; doi:10.7554/eLife.85023)
Supplement: Table 4—source data 3. — Each entry represents a single clonal mutation that is present in the drug-selected clone but not in the matched parent line (i.e. arose during the drug selection process). Note we conducted whole-genome sequencing for two representative clones from each flask. The others were characterized via Sanger sequencing of the dhodh locus (see Source Data 4). [file elife-85023-table4-data3.xlsx]

## Sheet: Sheet1
Table 4- Source Data 3: Homozygous variants identified from in vitro selections by whole-genome sequencing. Each entry represents a single clonal mutation that is present in the drug-selected clone but not in the matched parent line (i.e. arose during the drug selection process). Note we conducted Sanger sequencing for only two clones from each flask. The others were characterizec via Sanger sequ…
Sample Name	Parent Line	Chromosome	Position	Gene_Name	Gene_Description	Quality	Ref_Base	Alt_Base	Type	Effect	Impact	Codon_Change	Amino_Acid_Change
TCMDC125334-DT-F1-C1	3D7 A10 Parent	Pf3D7_09_v3	1137311	PF3D7_0928100	conserved Plasmodium protein, unknown function	8425.14	T	A	SNP	missense_variant	MISSENSE	aaA/aaT	p.Lys291Asn/c.873A>T
TCMDC125334-DT-F1-C1	3D7 A10 Parent	Pf3D7_03_v3	969291			669.86	C	CT	INDEL	intergenic_region			n.969291_969292insT
TCMDC125334-DT-F1-C1	3D7 A10 Parent	Pf3D7_14_v3	1673572	PF3D7_1441100	conserved Plasmodium protein, unknown function	16661.1	T	TTCATCATCA	INDEL	disruptive_inframe_insertion		gaa/gaTGATGATGAa	p.Asp163_Asp165dup/c.489_497dupTGATGATGA
TCMDC125334-DT-F1-C3	3D7 A10 Parent	Pf3D7_09_v3	1137311	PF3D7_0928100	conserved Plasmodium protein, unknown function	8425.14	T	A	SNP	missense_variant	MISSENSE	aaA/aaT	p.Lys291Asn/c.873A>T
TCMDC125334-DT-F1-C3	3D7 A10 Parent	Pf3D7_08_v3	10445			7037.1	T	TACTAACATCATCACA	INDEL	intergenic_region			n.10445_10446insACTAACATCATCACA
TCMDC125334-DT-F1-C3	3D7 A10 Parent	Pf3D7_10_v3	1351723	PF3D7_1033800	plasmepsin VII	527.51	TTATATA	T	INDEL	intron_variant			c.505+23_505+28delTATATA
TCMDC125334-DT-F2-C1	3D7 A10 Parent	Pf3D7_06_v3	130444	PF3D7_0603300	dihydroorotate dehydrogenase, mitochondrial precursor (DHODH)	22542.1	A	G	SNP	missense_variant	MISSENSE	gTt/gCt	p.Val532Ala/c.1595T>C
TCMDC125334-DT-F2-C1	3D7 A10 Parent	Pf3D7_08_v3	1472693			513.35	C	T	SNP	intergenic_region
TCMDC125334-DT-F2-C1	3D7 A10 Parent	Pf3D7_07_v3	382259	PF3D7_0708400	heat shock protein 90 (HSP90)	1858.1	A	AAGAAGG	INDEL	inframe_insertion		aga/GGAGAAaga	p.Gly229_Glu230dup/c.685_690dupGGAGAA
TCMDC125334-DT-F2-C2	3D7 A10 Parent	Pf3D7_06_v3	130444	PF3D7_0603300	dihydroorotate dehydrogenase, mitochondrial precursor (DHODH)	22542.1	A	G	SNP	missense_variant	MISSENSE	gTt/gCt	p.Val532Ala/c.1595T>C
TCMDC125334-DT-F2-C2	3D7 A10 Parent	Pf3D7_07_v3	595948	PF3D7_0712900	erythrocyte membrane protein 1, PfEMP1 (VAR)	18045.1	T	C	SNP	missense_variant	MISSENSE	Agt/Ggt	p.Ser596Gly/c.1786A>G
TCMDC125334-DT-F2-C2	3D7 A10 Parent	Pf3D7_07_v3	595953	PF3D7_0712900	erythrocyte membrane protein 1, PfEMP1 (VAR)	11842.1	C	T	SNP	missense_variant	MISSENSE	aGt/aAt	p.Ser594Asn/c.1781G>A
TCMDC125334-DT-F2-C2	3D7 A10 Parent	Pf3D7_07_v3	595947	PF3D7_0712900	erythrocyte membrane protein 1, PfEMP1 (VAR)	17090.1	C	CCACCAG	INDEL	inframe_insertion		agt/aCTGGTGgt	p.Ser596delinsThrGlyGly/c.1786_1787insCTGGTG
TCMDC125334-DT-F2-C2	3D7 A10 Parent	Pf3D7_07_v3	595963	PF3D7_0712900	erythrocyte membrane protein 1, PfEMP1 (VAR)	10213.1	TACG	T	INDEL	inframe_deletion		cgt/	p.Arg590del/c.1768_1770delCGT
TCMDC125334-DT-F2-C2	3D7 A10 Parent	Pf3D7_07_v3	595970	PF3D7_0712900	erythrocyte membrane protein 1, PfEMP1 (VAR)	10663.1	T	TAA	INDEL	frameshift_variant		caa/caTTa	p.Gln588fs/c.1763_1764insTT
TCMDC125334-DT-F2-C2	3D7 A10 Parent	Pf3D7_07_v3	595973	PF3D7_0712900	erythrocyte membrane protein 1, PfEMP1 (VAR)	10123.1	T	TA	INDEL	frameshift_variant		gaa/gaTa	p.Glu587fs/c.1760_1761insT
TCMDC125334-DT-F2-C2	3D7 A10 Parent	Pf3D7_07_v3	595975	PF3D7_0712900	erythrocyte membrane protein 1, PfEMP1 (VAR)	10708.1	C	CAAGATTTAT	INDEL	inframe_insertion		caa/caaATAAATCTT	p.Gln586_Glu587insIleAsnLeu/c.1758_1759insATAAATCTT
TCMDC125334-DT-F2-C2	3D7 A10 Parent	Pf3D7_07_v3	595978	PF3D7_0712900	erythrocyte membrane protein 1, PfEMP1 (VAR)	8743.1	G	GATC	INDEL	inframe_insertion		tgc/tgcGAT	p.Cys585_Gln586insAsp/c.1755_1756insGAT
